# Supplementary material for: The Parasporal Body of Bacillus thuringiensis subsp. israelensis: A Unique Phage Capsid-Associated Prokaryotic Insecticidal Organelle
Source: MDPI journal article supplement (doi:10.3390/biology12111421), 2023-11-11
Supplement: s1 [file s1]

1. WP\_103592558.1 hypothetical protein [Bacillus thuringiensis]
2. WP\_001196891.1 hypothetical protein [Bacillus thuringiensis]
3. WP\_043936493.1 MULTISPECIES: hypothetical protein [unclassified Bacillus (in: Bacteria)]
4. WP\_214931495.1 hypothetical protein [Bacillus sp. ISL-8]
5. WP\_098223856.1 hypothetical protein [Bacillus thuringiensis]
6. WP\_198130194.1 hypothetical protein [Bacillus thuringiensis]
7. WP\_150159506.1 hypothetical protein [Bacillus cereus]
8. WP\_001196890.1 MULTISPECIES: hypothetical protein [Bacillaceae]
9. WP\_151619209.1 hypothetical protein [Bacillus cereus]
10. WP\_087876301.1 hypothetical protein [Bacillus thuringiensis]
11. WP\_242555206.1 hypothetical protein [Bacillus cereus]
12. WP\_118415087.1 hypothetical protein [Bacillus thuringiensis]
13. WP\_153599337.1 hypothetical protein [Bacillus thuringiensis]
14. WP\_093290892.1 hypothetical protein [Thermoactinomyces sp. DSM 45892]
15. WP\_090719323.1 hypothetical protein [Nitrosomonas sp. Nm166]
16. WP\_090657007.1 hypothetical protein [Nitrosomonas marina]
17. WP\_090629228.1 hypothetical protein [Nitrosomonas marina]
18. WP\_090698829.1 hypothetical protein [Nitrosomonas aestuarii]
19. MCB1985445.1 hypothetical protein [Nitrosomonas sp.]
20. MCO6429124.1 hypothetical protein [Nitrosomonas communis]
21. SER17553.1 hypothetical protein SAMN05421690\_10118 [Nitrosomonas sp. Nm51]
22. WP\_143058755.1 hypothetical protein [Nitrosomonas marina]
23. WP\_143057368.1 hypothetical protein [Nitrosomonas sp. Nm51]
24. MCP5243701.1 hypothetical protein [Burkholderiales bacterium]
25. WP\_090698296.1 hypothetical protein [Nitrosomonas aestuarii]
26. WP\_090634528.1 hypothetical protein [Nitrosomonas marina]
27. WP\_090331542.1 hypothetical protein [Nitrosomonas sp. Nm51]
28. MCB1948730.1 hypothetical protein [Nitrosomonas sp.]
29. MBV6516776.1 hypothetical protein [Planctomycetes bacterium]
30. NUO17800.1 hypothetical protein [Planctomycetaceae bacterium]
31. MCC6151602.1 hypothetical protein [Planctomycetes bacterium]
32. MCC6149736.1 hypothetical protein [Planctomycetes bacterium]
33. MBP9893028.1 hypothetical protein [Planctomycetes bacterium]
34. MCA8919643.1 hypothetical protein [Planctomycetes bacterium]
35. MCQ3948913.1 hypothetical protein [Planctomycetes bacterium]
36. WP\_254705115.1 hypothetical protein [Bacillus thuringiensis]
37. MCC7510907.1 hypothetical protein [Planctomycetes bacterium]
38. KAA0216165.1 hypothetical protein EDM80\_04610 [bacterium]
39. WP\_199019276.1 hypothetical protein [Paenibacillus roseus]
40. MBK8207208.1 hypothetical protein [Planctomycetes bacterium]
41. WP\_199019274.1 hypothetical protein [Paenibacillus roseus]
42. MCC7507738.1 hypothetical protein [Planctomycetes bacterium]
43. MCC7508108.1 hypothetical protein [Planctomycetes bacterium]
44. MBK8206537.1 hypothetical protein [Planctomycetes bacterium]
45. MBP9891346.1 hypothetical protein [Planctomycetes bacterium]
46. MBK8206605.1 hypothetical protein [Planctomycetes bacterium]
47. MBE7490899.1 hypothetical protein [Planctomycetes bacterium]
48. MBK8207622.1 hypothetical protein [Planctomycetes bacterium]
49. MBK8205278.1 hypothetical protein [Planctomycetes bacterium]
50. MCC7509103.1 hypothetical protein [Planctomycetes bacterium]
51. MCB9934236.1 hypothetical protein [Planctomycetes bacterium]
52. KAA0210941.1 hypothetical protein EDM80\_12875 [bacterium]
53. MCC6742171.1 hypothetical protein [Planctomycetia bacterium]
54. MCB9894499.1 hypothetical protein [Planctomycetes bacterium]
55. MCC6742172.1 hypothetical protein [Planctomycetia bacterium]
56. MCQ3951076.1 hypothetical protein [Planctomycetes bacterium]
57. MCC6687398.1 hypothetical protein [Fimbriimonadaceae bacterium]
58. MCB9935966.1 hypothetical protein [Planctomycetes bacterium]
59. NUN50366.1 hypothetical protein [Candidatus Brocadiae bacterium]
60. MBX3458745.1 hypothetical protein [Planctomycetes bacterium]
61. MCE9583168.1 hypothetical protein [Planctomycetes bacterium]
62. MCC7510851.1 hypothetical protein [Planctomycetes bacterium]
63. MBP9891054.1 hypothetical protein [Planctomycetes bacterium]
64. MCE9583169.1 phage major capsid protein [Planctomycetes bacterium]
65. NUN50365.1 hypothetical protein [Candidatus Brocadiae bacterium]
66. MCA8918287.1 hypothetical protein [Planctomycetes bacterium]
67. MBX3461049.1 hypothetical protein [Planctomycetes bacterium]
68. KAF0245036.1 hypothetical protein FD180\_1973 [Planctomycetes bacterium]
69. MCC6738530.1 hypothetical protein [Planctomycetia bacterium]
70. MCC6149762.1 hypothetical protein [Planctomycetes bacterium]
71. MCQ3949629.1 hypothetical protein [Planctomycetes bacterium]
72. NUO16364.1 hypothetical protein [Planctomycetaceae bacterium]
73. CAG0962046.1 hypothetical protein PLCT2\_00815 [Planctomycetaceae bacterium]
74. WP\_002731357.1 hypothetical protein [Magnetospirillum molischianum]
75. MBX3459031.1 hypothetical protein [Planctomycetes bacterium]
76. MCQ3948721.1 hypothetical protein [Planctomycetes bacterium]
77. MCB9933912.1 hypothetical protein [Planctomycetes bacterium]
78. MBO6507501.1 phage major capsid protein [Roseibium sp.]

**79.** KAA0209033.1 hypothetical protein EDM80\_15205, partial [bacterium]  
**80.** WP\_238616883.1 phage major capsid protein [Ectothiorhodospira shaposhnikovii]  
**81.** NQZ53225.1 phage major capsid protein [Piscirickettsiaceae bacterium]  
**82.** WP\_199153549.1 hypothetical protein [Chromobacterium sp. ASV23]  
**83.** TDW20413.1 hypothetical protein EV128\_12543 [Rhizobium azibense]  
**84.** WP\_221103340.1 phage major capsid protein [Rhizobium bangladeshense]  
**85.** WP\_221122355.1 phage major capsid protein [Rhizobium lentis]  
**86.** QIG69072.1 major capsid protein [Rhizobium phage RHph\_N1\_10]  
**87.** MBP9891731.1 hypothetical protein [Planctomycetes bacterium]  
**88.** MCA8917006.1 hypothetical protein [Planctomycetes bacterium]  
**89.** QIG75611.1 major capsid protein [Rhizobium phage RHph\_Y2\_11]  
**90.** WP\_092498438.1 phage major capsid protein [Chelativorans sp. A52C2]  
**91.** MCB9936365.1 hypothetical protein [Planctomycetes bacterium]  
**92.** CAG0968390.1 hypothetical protein PLCT2\_01190 [Planctomycetaceae bacterium]  
**93.** MCC6150886.1 hypothetical protein [Planctomycetes bacterium]  
**94.** WP\_045991564.1 phage capsid protein [Halomonas sp. S2151]  
**95.** WP\_065784019.1 MULTISPECIES: phage capsid protein [unclassified Ensifer]  
**96.** WP\_144196640.1 phage major capsid protein [Cupriavidus campinensis]  
**97.** WP\_253399773.1 hypothetical protein [Methylobacterium extorquens]  
**98.** YP\_009620683.1 major capsid protein [Pseudomonas phage nickie]  
**99.** AMB48270.1 phage capsid protein [Methylobacterium sp. AMS5]  
**100.** UKL14918.1 major capsid protein [Pseudomonas phage hairong]  
**101.** WP\_026610715.1 hypothetical protein [Methylocaldum szegediense]  
**102.** MCC6152092.1 hypothetical protein [Planctomycetes bacterium]  
**103.** UIS24576.1 major capsid protein [Pseudomonas phage ZY21]  
**104.** WP\_247125312.1 phage major capsid protein [Acinetobacter baumannii]  
**105.** WP\_031986190.1 phage capsid protein [Acinetobacter baumannii]  
**106.** MBP4651980.1 phage major capsid protein [Acinetobacter baumannii]  
**107.** MCL2874769.1 phage major capsid protein [Betaproteobacteria bacterium]  
**108.** WP\_176966547.1 phage major capsid protein, partial [Acinetobacter baumannii]  
**109.** HAV4743116.1 phage major capsid protein [Acinetobacter baumannii]  
**110.** WP\_001130341.1 MULTISPECIES: hypothetical protein [Acinetobacter]  
**111.** WP\_224446258.1 hypothetical protein [Cupriavidus metallidurans]  
**112.** WP\_252429529.1 hypothetical protein, partial [Acinetobacter baumannii]  
**113.** MBQ0662298.1 phage major capsid protein [Acinetobacter baumannii]  
**114.** EUU0976857.1 phage major capsid protein [Acinetobacter baumannii]  
**115.** WP\_115292648.1 phage major capsid protein [Pseudomonas mendocina]  
**116.** DAP19794.1 TPA: MAG TPA: major capsid protein [Siphoviridae sp.]  
**117.** WP\_161289910.1 phage major capsid protein [Acinetobacter baumannii]  
**118.** WP\_001130337.1 hypothetical protein [Acinetobacter baumannii]  
**119.** DAM63278.1 TPA: MAG TPA: major capsid protein [Siphoviridae sp.]  
**120.** WP\_063664455.1 phage major capsid protein [Comamonas thiooxydans]  
**121.** WP\_252436504.1 phage major capsid protein, partial [Acinetobacter baumannii]  
**122.** WP\_104915983.1 phage major capsid protein [Acinetobacter baumannii]  
**123.** WP\_151708812.1 phage major capsid protein [Acinetobacter brisouii]  
**124.** WP\_031980863.1 phage capsid protein [Acinetobacter baumannii]  
**125.** WP\_023897583.1 hypothetical protein [Acinetobacter baumannii]  
**126.** HAV4899581.1 phage major capsid protein [Acinetobacter baumannii]  
**127.** WP\_042670060.1 phage capsid protein [Methylobacterium sp. B34]  
**128.** WP\_209651035.1 MULTISPECIES: hypothetical protein [Methylobacterium]  
**129.** WP\_124618513.1 phage major capsid protein [Burkholderia contaminans]  
**130.** WP\_059608968.1 hypothetical protein [Burkholderia anthina]  
**131.** WP\_059789217.1 hypothetical protein [Burkholderia sp. MSMB1072]  
**132.** EGY2841718.1 phage major capsid protein [Acinetobacter baumannii]  
**133.** MCK9569022.1 phage major capsid protein [Candidatus Pacearchaeota archaeon]  
**134.** WP\_059858205.1 hypothetical protein [Burkholderia cepacia]  
**135.** WP\_252414503.1 phage major capsid protein, partial [Acinetobacter baumannii]  
**136.** DAS20049.1 TPA: MAG TPA: major capsid protein [Siphoviridae sp.]  
**137.** WP\_093294920.1 phage major capsid protein [Sphingomonas sp. NFR04]  
**138.** WP\_102064968.1 phage major capsid protein [Ralstonia pickettii]  
**139.** WP\_247300523.1 hypothetical protein [Bradyrhizobium sp. 179]  
**140.** WP\_047884360.1 hypothetical protein [Photobacterium ganghwense]  
**141.** WP\_187057131.1 phage major capsid protein [Dyella telluris]  
**142.** WP\_155041137.1 phage major capsid protein [Paracoccus litorisediminis]  
**143.** WP\_207104130.1 phage major capsid protein [Photobacterium ganghwense]  
**144.** RWB95541.1 phage major capsid protein [Mesorhizobium sp.]  
**145.** WP\_150063515.1 phage major capsid protein [Roseospora marina]  
**146.** HIV77377.1 hypothetical protein [Candidatus Sphingomonas excrementigallinarum]  
**147.** WP\_097566451.1 phage major capsid protein [Cronobacter sakazakii]  
**148.** WP\_166500133.1 phage major capsid protein [Cronobacter sakazakii]  
**149.** WP\_216296239.1 phage major capsid protein [Cronobacter sakazakii]  
**150.** WP\_080953189.1 phage capsid protein [Cronobacter sakazakii]  
**151.** HAV7489798.1 phage major capsid protein [Escherichia coli]  
**152.** WP\_161580717.1 phage major capsid protein [Cronobacter muytjensii]  
**153.** RWI35418.1 phage major capsid protein [Mesorhizobium sp.]  
**154.** WP\_130097775.1 MULTISPECIES: phage major capsid protein [Citrobacter]  
**155.** EFG0346231.1 phage major capsid protein [Escherichia coli]  
**156.** WP\_029590302.1 MULTISPECIES: hypothetical protein [Cronobacter]  
**157.** WP\_085044976.1 phage capsid protein [Cronobacter sakazakii]  
**158.** WP\_052904762.1 MULTISPECIES: hypothetical protein [Enterobacteriaceae]

**159.** WP\_014962239.1 MULTISPECIES: hypothetical protein [Enterobacteriaceae]  
**160.** WP\_052904335.1 hypothetical protein [Escherichia coli]  
**161.** WP\_059296125.1 phage capsid protein, partial [Acinetobacter baumannii]  
**162.** MBE0438045.1 phage major capsid protein [Methylobacterium sp.]  
**163.** WP\_052983289.1 hypothetical protein [Shigella sonnei]  
**164.** WP\_105875125.1 phage major capsid protein [Cronobacter malonaticus]  
**165.** WP\_080817813.1 phage capsid protein [Cronobacter sakazakii]  
**166.** WP\_029463964.1 MULTISPECIES: hypothetical protein [Cronobacter]  
**167.** WP\_209732192.1 phage major capsid protein [Cronobacter sakazakii]  
**168.** WP\_032969640.1 hypothetical protein [Cronobacter malonaticus]  
**169.** WP\_080781210.1 phage capsid protein [Cronobacter sakazakii]  
**170.** WP\_096095769.1 phage major capsid protein [Escherichia coli]  
**171.** WP\_076734789.1 phage capsid protein [Cronobacter sakazakii]  
**172.** EFF6507864.1 phage major capsid protein [Escherichia coli]  
**173.** HAL3311757.1 phage major capsid protein [Escherichia coli]  
**174.** UTU32364.1 phage major capsid protein [Escherichia coli]  
**175.** MCK2723972.1 phage major capsid protein [Escherichia coli]  
**176.** EGS6838749.1 phage major capsid protein [Salmonella enterica subsp. enterica serovar Agona]  
**177.** WP\_244079899.1 phage major capsid protein [Escherichia coli]  
**178.** EHC2975283.1 phage major capsid protein [Shigella sonnei]  
**179.** WP\_069127011.1 phage capsid protein [Klebsiella pneumoniae]  
**180.** EDZ1273658.1 phage major capsid protein [Salmonella enterica]  
**181.** WP\_193125375.1 phage major capsid protein [Escherichia coli]  
**182.** EJJF8070929.1 phage major capsid protein [Escherichia coli]  
**183.** WP\_161620577.1 phage major capsid protein [Escherichia coli]  
**184.** EFJ2838014.1 phage major capsid protein [Escherichia coli]  
**185.** EJK5757188.1 phage major capsid protein [Escherichia coli]  
**186.** EIH9371074.1 phage major capsid protein [Escherichia coli]  
**187.** WP\_001130339.1 MULTISPECIES: hypothetical protein [Enterobacteriaceae]  
**188.** MHX32748.1 phage major capsid protein [Escherichia coli]  
**189.** WP\_072644904.1 phage capsid protein [Escherichia coli]  
**190.** MBC7264957.1 phage major capsid protein [Chloroflexi bacterium]  
**191.** HBL6848639.1 phage major capsid protein [Escherichia coli]  
**192.** WP\_062120516.1 phage major capsid protein [Aureimonas sp. AU40]  
**193.** HAH5045117.1 phage major capsid protein [Escherichia coli]  
**194.** WP\_243540855.1 phage major capsid protein [Escherichia coli]  
**195.** WP\_112901748.1 phage major capsid protein [Escherichia coli]  
**196.** EIT7775743.1 phage major capsid protein [Escherichia coli]  
**197.** EFV7979351.1 phage major capsid protein [Shigella sonnei]  
**198.** WP\_042063131.1 hypothetical protein [Escherichia coli]  
**199.** EEZ8393064.1 phage major capsid protein [Escherichia coli]  
**200.** EEY7369300.1 phage major capsid protein [Escherichia coli]  
**201.** EFG0309418.1 phage major capsid protein [Escherichia coli]  
**202.** WP\_182552267.1 phage major capsid protein [Phyllobacterium myrsinacearum]  
**203.** WP\_063091425.1 hypothetical protein [Escherichia coli]  
**204.** CAB4122113.1 hypothetical protein UFOVP26\_79 [uncultured Caudovirales phage]  
**205.** WP\_112043712.1 phage major capsid protein [Escherichia coli]  
**206.** HBB7811611.1 phage major capsid protein [Escherichia coli]  
**207.** WP\_001130338.1 MULTISPECIES: hypothetical protein [Enterobacteriaceae]  
**208.** HAJ7535281.1 phage major capsid protein [Escherichia coli]  
**209.** WP\_096165287.1 phage major capsid protein [Escherichia coli]  
**210.** WP\_085457360.1 phage capsid protein [Escherichia coli]  
**211.** WP\_032328869.1 hypothetical protein [Escherichia coli]  
**212.** WP\_053904528.1 MULTISPECIES: hypothetical protein [Escherichia]  
**213.** MBB0544530.1 phage major capsid protein [Escherichia coli]  
**214.** EFK7891705.1 phage major capsid protein [Escherichia coli]  
**215.** EAB8604575.1 phage major capsid protein [Shigella sonnei]  
**216.** WP\_149556591.1 phage major capsid protein [Escherichia coli]  
**217.** WP\_149540218.1 phage major capsid protein [Escherichia albertii]  
**218.** EFH9124402.1 phage major capsid protein [Escherichia coli]  
**219.** WP\_052988632.1 MULTISPECIES: hypothetical protein [Enterobacteriaceae]  
**220.** WP\_247150342.1 phage major capsid protein [Escherichia coli]  
**221.** WP\_094259633.1 phage major capsid protein [Escherichia coli]  
**222.** WP\_061158051.1 hypothetical protein [Escherichia coli]  
**223.** WP\_033803025.1 hypothetical protein [Escherichia coli]  
**224.** MBZ8365671.1 phage major capsid protein [Escherichia coli]  
**225.** WP\_203054096.1 phage major capsid protein [Escherichia coli]  
**226.** EFC1505940.1 phage major capsid protein [Escherichia coli]  
**227.** WP\_134894003.1 phage major capsid protein [Escherichia coli]  
**228.** WP\_251569595.1 hypothetical protein [Parasutterella sp. DSM 108034]  
**229.** HBU8289600.1 phage major capsid protein [Escherichia coli]  
**230.** WP\_160334835.1 phage major capsid protein [Parasutterella sp. NM82\_D38]  
**231.** HBH5230159.1 phage major capsid protein [Escherichia coli]  
**232.** WP\_106889102.1 phage major capsid protein [Escherichia coli]  
**233.** HAM5980914.1 phage major capsid protein [Escherichia coli]  
**234.** WP\_161623763.1 phage major capsid protein [Escherichia coli]  
**235.** EFF1057382.1 phage major capsid protein [Escherichia coli]  
**236.** EFZ7197477.1 phage major capsid protein [Shigella sonnei]  
**237.** WP\_231351989.1 phage major capsid protein [Escherichia coli]  
**238.** WP\_193119742.1 phage major capsid protein [Escherichia coli]



**239.** WP\_252127766.1 phage major capsid protein [Thermomicrobium sp. CFH 73360]  
**240.** EFW0034188.1 phage major capsid protein [Shigella sonnei]  
**241.** EJE3861318.1 phage major capsid protein [Escherichia coli]  
**242.** WP\_085458157.1 MULTISPECIES: phage capsid protein [Escherichia]  
**243.** WP\_094337983.1 MULTISPECIES: phage major capsid protein [Escherichia]  
**244.** WP\_053886737.1 MULTISPECIES: hypothetical protein [Enterobacteriaceae]  
**245.** MCN1174709.1 phage major capsid protein [Escherichia coli]  
**246.** WP\_152935148.1 phage major capsid protein [Escherichia coli]  
**247.** EFX2756071.1 phage major capsid protein [Shigella sonnei]  
**248.** EFC0466466.1 phage major capsid protein [Escherichia coli]  
**249.** MCN4038342.1 phage major capsid protein [Escherichia coli]  
**250.** EFD9355743.1 phage major capsid protein [Escherichia coli]  
**251.** WP\_097497792.1 phage major capsid protein [Escherichia coli]  
**252.** EFA9209962.1 phage major capsid protein [Escherichia coli]  
**253.** HBB1414416.1 phage major capsid protein [Escherichia coli]  
**254.** HAO7436534.1 phage major capsid protein [Escherichia coli]  
**255.** HAW3037422.1 phage major capsid protein [Escherichia coli]  
**256.** HAW1565627.1 phage major capsid protein [Escherichia coli]  
**257.** WP\_032187309.1 MULTISPECIES: hypothetical protein [Enterobacteriaceae]  
**258.** EEQ2490861.1 phage major capsid protein [Escherichia coli]  
**259.** WP\_053900371.1 hypothetical protein [Escherichia coli]  
**260.** WP\_109949435.1 phage major capsid protein [Escherichia coli]  
**261.** HCC6220448.1 phage major capsid protein [Klebsiella pneumoniae]  
**262.** HAN9820645.1 phage major capsid protein [Escherichia coli]  
**263.** WP\_046622184.1 MULTISPECIES: hypothetical protein [Enterobacter cloacae complex]  
**264.** WP\_039264878.1 MULTISPECIES: hypothetical protein [Enterobacteriaceae]  
**265.** WP\_113613520.1 phage major capsid protein [Klebsiella pneumoniae]  
**266.** EEV7694734.1 phage major capsid protein [Escherichia coli]  
**267.** WP\_072124166.1 phage capsid protein [Klebsiella variicola]  
**268.** WP\_048292500.1 hypothetical protein [Klebsiella pneumoniae]  
**269.** WP\_247188155.1 phage major capsid protein [Escherichia coli]  
**270.** DAE04111.1 TPA: MAG TPA: major capsid protein [Siphoviridae sp. ctmpG14]  
**271.** WP\_001405040.1 hypothetical protein [Escherichia coli]  
**272.** WP\_065304476.1 phage capsid protein [Escherichia coli]  
**273.** HBZ3184842.1 phage major capsid protein [Klebsiella pneumoniae]  
**274.** WP\_119127007.1 phage major capsid protein [Klebsiella pneumoniae]  
**275.** EIM7866883.1 phage major capsid protein [Escherichia coli]  
**276.** WP\_001130340.1 MULTISPECIES: hypothetical protein [Enterobacteriaceae]  
**277.** WP\_202979481.1 phage major capsid protein [Escherichia coli]  
**278.** HAT3636238.1 phage major capsid protein [Raoultella ornithinolytica]  
**279.** EFI9420290.1 phage major capsid protein [Escherichia coli]  
**280.** WP\_126646421.1 phage major capsid protein [Escherichia coli]  
**281.** WP\_252461054.1 phage major capsid protein, partial [Acinetobacter baumannii]  
**282.** WP\_221016063.1 phage major capsid protein [Klebsiella pneumoniae]  
**283.** EFK0326126.1 phage major capsid protein [Escherichia coli]  
**284.** HAJ7861025.1 phage major capsid protein [Escherichia coli]  
**285.** EHH5028748.1 phage major capsid protein [Escherichia coli]  
**286.** HAU5664456.1 phage major capsid protein [Citrobacter freundii]  
**287.** EAB6775759.1 phage major capsid protein [Escherichia coli]  
**288.** EBZ0832066.1 phage major capsid protein [Salmonella enterica subsp. enterica serovar Java]  
**289.** WP\_064343494.1 MULTISPECIES: hypothetical protein [Klebsiella]  
**290.** WP\_087507360.1 phage capsid protein [Escherichia coli]  
**291.** WP\_236525880.1 phage major capsid protein [Escherichia coli]  
**292.** WP\_096178288.1 phage major capsid protein [Escherichia coli]  
**293.** WP\_104074192.1 phage major capsid protein [Escherichia coli]  
**294.** HAL2790855.1 phage major capsid protein [Escherichia coli]  
**295.** HBR7729850.1 phage major capsid protein [Klebsiella pneumoniae]  
**296.** WP\_221012288.1 phage major capsid protein [Klebsiella pneumoniae]  
**297.** HBV4481339.1 phage major capsid protein [Klebsiella pneumoniae]  
**298.** EFF2501934.1 phage major capsid protein [Escherichia coli]  
**299.** EIW9109236.1 phage major capsid protein [Klebsiella pneumoniae]  
**300.** HAO3297438.1 phage major capsid protein [Escherichia coli]  
**301.** WP\_064165097.1 hypothetical protein [Klebsiella pneumoniae]  
**302.** QJJ61945.1 phage major capsid protein [Klebsiella pneumoniae]  
**303.** WP\_089075232.1 phage major capsid protein [Escherichia coli]  
**304.** WP\_097307300.1 phage major capsid protein [Escherichia coli]  
**305.** HBR4262047.1 phage major capsid protein [Klebsiella pneumoniae]  
**306.** WP\_004109857.1 MULTISPECIES: hypothetical protein [Enterobacteriaceae]  
**307.** EEO4716749.1 phage major capsid protein [Salmonella enterica subsp. enterica serovar Tennessee]  
**308.** HBT8335443.1 phage major capsid protein [Klebsiella pneumoniae]  
**309.** EHK0743263.1 phage major capsid protein [Salmonella enterica]  
**310.** WP\_006812514.1 MULTISPECIES: hypothetical protein [Enterobacteriaceae]  
**311.** WP\_054625182.1 MULTISPECIES: hypothetical protein [Enterobacteriaceae]  
**312.** WP\_032217427.1 hypothetical protein [Escherichia coli]  
**313.** EET8203310.1 phage major capsid protein [Escherichia coli]  
**314.** WP\_045339225.1 MULTISPECIES: hypothetical protein [Enterobacteriaceae]  
**315.** EIH0829516.1 phage major capsid protein [Escherichia coli]  
**316.** CAF2811462.1 hypothetical protein AI2925V1\_5194 [Klebsiella pneumoniae]  
**317.** EIG5508613.1 phage major capsid protein [Salmonella enterica]  
**318.** WP\_194797343.1 phage major capsid protein [Klebsiella pneumoniae]

**319.** WP\_078207497.1 phage capsid protein [Escherichia coli]  
**320.** WP\_016607444.1 hypothetical protein [Yersinia pestis]  
**321.** WP\_204363305.1 phage major capsid protein [Klebsiella pneumoniae]  
**322.** EBK5293162.1 phage major capsid protein [Salmonella enterica]  
**323.** WP\_063929200.1 hypothetical protein [Enterobacter hormaechei]  
**324.** EEZ8608344.1 phage major capsid protein [Escherichia coli]  
**325.** WP\_096842503.1 phage major capsid protein [Escherichia coli]  
**326.** HBX2495344.1 phage major capsid protein [Klebsiella pneumoniae]  
**327.** WP\_065519942.1 phage capsid protein [Klebsiella pneumoniae]  
**328.** WP\_086910796.1 MULTISPECIES: phage capsid protein [Klebsiella]  
**329.** WP\_040110313.1 MULTISPECIES: hypothetical protein [Enterobacteriaceae]  
**330.** WP\_194304202.1 phage major capsid protein [Enterobacter hormaechei]  
**331.** WP\_116431201.1 phage major capsid protein [Klebsiella pneumoniae]  
**332.** WP\_001130336.1 MULTISPECIES: hypothetical protein [Enterobacteriaceae]  
**333.** WP\_250209263.1 phage major capsid protein [Enterobacter cloacae]  
**334.** WP\_023316010.1 MULTISPECIES: hypothetical protein [Enterobacteriaceae]  
**335.** ECB7446470.1 phage major capsid protein [Salmonella enterica subsp. enterica serovar Braenderup]  
**336.** HAM5174158.1 phage major capsid protein [Escherichia coli]  
**337.** EHR3333785.1 phage major capsid protein [Salmonella enterica subsp. enterica serovar Senftenberg]  
**338.** HBV3788408.1 phage major capsid protein [Klebsiella pneumoniae]  
**339.** EBS8359733.1 phage major capsid protein [Salmonella enterica]  
**340.** WP\_159115294.1 phage major capsid protein [Klebsiella pneumoniae]  
**341.** WP\_060458874.1 MULTISPECIES: hypothetical protein [Enterobacter cloacae complex]  
**342.** EET8285689.1 phage major capsid protein [Escherichia coli]  
**343.** WP\_002211784.1 MULTISPECIES: hypothetical protein [Gammaproteobacteria]  
**344.** WP\_072105584.1 phage capsid protein [Enterobacter cloacae]  
**345.** WP\_150006605.1 phage major capsid protein, partial [Klebsiella pneumoniae]  
**346.** WP\_175617232.1 phage major capsid protein [Escherichia coli]  
**347.** WP\_192856648.1 phage major capsid protein, partial [Escherichia coli]  
**348.** EHJ4216072.1 phage major capsid protein [Salmonella enterica]  
**349.** WP\_227899545.1 phage major capsid protein [Escherichia coli]  
**350.** HCD2326535.1 phage major capsid protein [Enterobacter hormaechei]  
**351.** WP\_086374674.1 phage capsid protein, partial [Acinetobacter baumannii]  
**352.** EDQ0380811.1 phage major capsid protein [Salmonella enterica subsp. enterica serovar Oslo]  
**353.** BDD45295.1 hypothetical protein 17 [bacterium]  
**354.** HBT7858040.1 phage major capsid protein [Klebsiella pneumoniae]  
**355.** WP\_060453932.1 MULTISPECIES: hypothetical protein [Enterobacteriaceae]  
**356.** EAA4173638.1 phage major capsid protein [Salmonella enterica subsp. enterica]  
**357.** HBQ8554378.1 phage major capsid protein [Klebsiella pneumoniae]  
**358.** WP\_247156820.1 phage major capsid protein [Escherichia coli]  
**359.** HBV0452233.1 phage major capsid protein [Escherichia coli]  
**360.** EDW0215574.1 phage major capsid protein [Salmonella enterica subsp. enterica]  
**361.** WP\_046083837.1 hypothetical protein [Escherichia fergusonii]  
**362.** EIW8542850.1 phage major capsid protein [Klebsiella pneumoniae]  
**363.** HAK0268282.1 phage major capsid protein [Salmonella enterica]  
**364.** EGK6915180.1 phage major capsid protein [Salmonella enterica subsp. enterica serovar Enteritidis]  
**365.** WP\_071692149.1 phage capsid protein [Citrobacter portucalensis]  
**366.** EBN2282108.1 phage major capsid protein [Salmonella enterica]  
**367.** EDQ3388105.1 phage major capsid protein [Salmonella enterica subsp. houtenae]  
**368.** ECT3984105.1 phage major capsid protein [Salmonella enterica subsp. houtenae serovar 53:z4,z23:-]  
**369.** EBV1651518.1 phage major capsid protein [Salmonella enterica subsp. enterica serovar Bareilly]  
**370.** WP\_042863544.1 hypothetical protein [Enterobacter hormaechei]  
**371.** WP\_048231968.1 MULTISPECIES: hypothetical protein [Citrobacter freundii complex]  
**372.** EEP8077587.1 phage major capsid protein [Salmonella enterica subsp. enterica serovar Braenderup]  
**373.** WP\_016587721.1 hypothetical protein [Yersinia pestis]  
**374.** HAX9983652.1 phage major capsid protein [Escherichia coli]  
**375.** WP\_075191900.1 MULTISPECIES: phage capsid protein [Cronobacter]  
**376.** HAY3994692.1 phage major capsid protein [Escherichia coli]  
**377.** MBO9360510.1 phage major capsid protein [Thermomicrobium sp.]  
**378.** HAD4280041.1 phage major capsid protein [Salmonella enterica subsp. enterica serovar Typhi str. CT18]  
**379.** HBY0825155.1 phage major capsid protein [Klebsiella pneumoniae]  
**380.** EBH6160155.1 phage major capsid protein [Salmonella enterica]  
**381.** WP\_023221754.1 hypothetical protein [Salmonella enterica]  
**382.** MCK5604243.1 phage major capsid protein [Candidatus Pacearchaeota archaeon]  
**383.** EHD3174008.1 phage major capsid protein [Salmonella enterica]  
**384.** ECQ3861573.1 phage major capsid protein [Salmonella enterica]  
**385.** EGQ6262282.1 phage major capsid protein [Salmonella enterica subsp. enterica serovar Enteritidis]  
**386.** WP\_114569653.1 phage major capsid protein [Escherichia coli]  
**387.** WP\_028449712.1 phage major capsid protein [Chitinibacter tainanensis]  
**388.** ECC6545565.1 phage major capsid protein [Salmonella enterica]  
**389.** MCM6396231.1 phage major capsid protein [Klebsiella pneumoniae]  
**390.** RPJ40005.1 phage major capsid protein [Planctomycetaceae bacterium]  
**391.** EAB0133809.1 phage major capsid protein [Salmonella enterica]  
**392.** HCH9832956.1 phage major capsid protein [Salmonella enterica]  
**393.** WP\_169724898.1 phage major capsid protein [Enterobacter hormaechei]  
**394.** ECG2845924.1 phage major capsid protein [Salmonella enterica subsp. enterica serovar Manhattan]  
**395.** EBX1374166.1 phage major capsid protein [Salmonella enterica subsp. enterica serovar Newport]  
**396.** HAX2345276.1 phage major capsid protein [Escherichia coli]  
**397.** UQM93941.1 major head protein [Stenotrophomonas phage vB\_Sm\_QDWS359]  
**398.** EEU2445140.1 phage major capsid protein [Escherichia coli]

**399.** EBS5432372.1 phage major capsid protein [Salmonella enterica subsp. enterica serovar Alachua]  
**400.** EAX1817979.1 phage major capsid protein [Salmonella enterica]  
**401.** EBR9946236.1 phage major capsid protein [Salmonella enterica subsp. enterica serovar Krefeld]  
**402.** HBC0308464.1 phage major capsid protein [Salmonella enterica subsp. enterica serovar Napoli]  
**403.** HBZ3547779.1 phage major capsid protein [Klebsiella pneumoniae]  
**404.** MCB2982456.1 phage major capsid protein [Klebsiella pneumoniae]  
**405.** EER4805513.1 phage major capsid protein [Escherichia coli]  
**406.** EGO4917944.1 phage major capsid protein [Salmonella enterica]  
**407.** HBV9739600.1 phage major capsid protein [Klebsiella pneumoniae]  
**408.** HAD4904499.1 phage major capsid protein [Salmonella enterica subsp. enterica serovar Typhi str. CT18]  
**409.** EAB5862671.1 phage major capsid protein [Salmonella enterica subsp. enterica]  
**410.** WP\_079825253.1 phage capsid protein [Salmonella enterica]  
**411.** EBE2364545.1 phage major capsid protein [Salmonella enterica]  
**412.** EBR8005981.1 phage major capsid protein [Salmonella enterica subsp. enterica serovar Saintpaul]  
**413.** EFO0755060.1 phage major capsid protein [Escherichia coli]  
**414.** WP\_063592850.1 hypothetical protein [Salmonella enterica]  
**415.** EDK9786262.1 phage major capsid protein [Salmonella enterica subsp. enterica serovar Give]  
**416.** ECD3753536.1 phage major capsid protein [Salmonella enterica subsp. enterica serovar Orion]  
**417.** HBN7443553.1 phage major capsid protein [Escherichia coli]  
**418.** WP\_252044140.1 phage major capsid protein [Enterobacter asburiae]  
**419.** QHJ78809.1 hypothetical protein [Bacteriophage sp.]  
**420.** EBC2961021.1 phage major capsid protein [Salmonella enterica]  
**421.** EGS7371949.1 phage major capsid protein [Escherichia coli]  
**422.** EEW0868939.1 phage major capsid protein [Escherichia coli]  
**423.** HBQ4879992.1 phage major capsid protein [Escherichia coli]  
**424.** EDZ5493145.1 phage major capsid protein [Salmonella enterica]  
**425.** EFV9537430.1 phage major capsid protein [Shigella sonnei]  
**426.** EFH0306860.1 phage major capsid protein [Escherichia coli]  
**427.** EFW4078867.1 phage major capsid protein [Shigella sonnei]  
**428.** EDU5118278.1 phage major capsid protein [Salmonella enterica subsp. enterica serovar Anatum]  
**429.** EEV7166997.1 phage major capsid protein [Escherichia coli]  
**430.** HBE0118361.1 phage major capsid protein [Shigella sonnei]  
**431.** EAQ8609054.1 phage major capsid protein [Salmonella enterica]  
**432.** QXN72400.1 major capsid protein [Rhodobacter phage RcSimone-Hastad]  
**433.** EFO1692251.1 phage major capsid protein [Escherichia coli]  
**434.** MBD7755531.1 phage major capsid protein [Klebsiella pneumoniae]  
**435.** WP\_102003656.1 phage major capsid protein [Klebsiella pneumoniae]  
**436.** EEA1371212.1 phage major capsid protein [Salmonella enterica]  
**437.** MBA8354127.1 phage major capsid protein [Escherichia coli]  
**438.** EGI1978062.1 phage major capsid protein [Salmonella enterica]  
**439.** DAJ05229.1 TPA: MAG TPA: major capsid protein [Siphoviridae sp.]  
**440.** EJJF9244945.1 phage major capsid protein [Escherichia coli]  
**441.** WP\_015922589.1 phage major capsid protein [Thermomicrobium roseum]  
**442.** WP\_181374643.1 phage major capsid protein [Pectobacterium carotovorum]  
**443.** HCH7946627.1 phage major capsid protein [Escherichia coli]  
**444.** WP\_223762983.1 phage major capsid protein [Corallococcus sp. AS-1-6]  
**445.** MBW2636049.1 phage major capsid protein [Deltaproteobacteria bacterium]  
**446.** EET1013303.1 phage major capsid protein [Escherichia coli]  
**447.** EIQ1087120.1 phage major capsid protein [Escherichia coli]  
**448.** MCM8749459.1 phage major capsid protein [Thermomicrobiaceae bacterium CFH 74404]  
**449.** EJA7649394.1 phage major capsid protein [Escherichia coli]  
**450.** EIT1058465.1 phage major capsid protein [Escherichia coli]  
**451.** GBD19714.1 hypothetical protein HRbin28\_00148 [bacterium HR28]  
**452.** MBX5446219.1 phage major capsid protein [Sphaerobacter sp.]  
**453.** EJA5029925.1 phage major capsid protein [Salmonella enterica]  
**454.** YP\_009996955.1 major head protein [Xanthomonas phage Xoo-sp2]  
**455.** WP\_224020286.1 hypothetical protein [Burkholderia vietnamiensis]  
**456.** HBQ7547743.1 phage major capsid protein [Klebsiella pneumoniae]  
**457.** EFC1758968.1 phage major capsid protein [Escherichia coli]  
**458.** EDU4451998.1 phage major capsid protein [Salmonella enterica subsp. enterica serovar Anatum]  
**459.** WP\_153283238.1 phage major capsid protein [Variovorax paradoxus]  
**460.** HBB2595907.1 phage major capsid protein [Escherichia coli]  
**461.** YP\_009997022.1 hypothetical protein JTY56\_gp20 [Xanthomonas phage Bosa]  
**462.** EEZ6802210.1 phage major capsid protein [Escherichia coli]  
**463.** MBX3473679.1 hypothetical protein [Planctomycetes bacterium]  
**464.** EFW0729459.1 phage major capsid protein [Shigella sonnei]  
**465.** EHL0287849.1 phage major capsid protein [Escherichia coli]  
**466.** EER8844980.1 phage major capsid protein [Escherichia coli]  
**467.** EFN9767071.1 phage major capsid protein [Escherichia coli]  
**468.** WP\_137447163.1 phage major capsid protein, partial [Escherichia coli]  
**469.** MCJ8600995.1 phage major capsid protein [Klebsiella pneumoniae]  
**470.** EFH8846498.1 phage major capsid protein [Escherichia coli]  
**471.** UAW07626.1 major head protein [Pseudomonas phage AIIMS-Plu-RaNi]  
**472.** WP\_152881049.1 phage major capsid protein [Duganella sp. FT27W]  
**473.** YP\_009196268.1 major head protein [Pseudomonas phage PaMx11]  
**474.** EIB9668287.1 phage major capsid protein [Escherichia coli]  
**475.** HBL5398680.1 phage major capsid protein [Escherichia coli]  
**476.** UIS24744.1 major head protein [Stenotrophomonas phage vB\_SmaS-AXL\_1]  
**477.** CAH1069075.1 Uncharacterised protein [Acinetobacter phage MD-2021a]  
**478.** WP\_163998672.1 phage major capsid protein [Pyxidicoccus caerfyrdinensis]

**479.** URA07134.1 major capsid protein [Xanthomonas phage Mallos]  
**480.** YP\_009996845.1 major head protein [Pseudomonas phage Epa5]  
**481.** EFC2304030.1 phage major capsid protein [Escherichia coli]  
**482.** EHH4005454.1 phage major capsid protein [Escherichia coli]  
**483.** WP\_067370658.1 phage capsid protein [Morganella psychrotolerans]  
**484.** EHW0876436.1 phage major capsid protein [Escherichia coli]  
**485.** WP\_012870511.1 phage major capsid protein [Sphaerobacter thermophilus]  
**486.** WP\_136134600.1 phage major capsid protein [Providencia sp. MGF014]  
**487.** EDS1306404.1 phage major capsid protein [Salmonella enterica]  
**488.** WP\_099110294.1 phage major capsid protein [Xenorhabdus sp. KJ12.1]  
**489.** WP\_038234216.1 hypothetical protein [Xenorhabdus szentirmaii]  
**490.** UGL62843.1 major head protein [Xanthomonas phage MET13-T1]  
**491.** EIH9254667.1 phage major capsid protein [Escherichia coli]  
**492.** WP\_121762769.1 phage major capsid protein [Corallococcus sp. AB038B]  
**493.** EFH8389121.1 phage major capsid protein [Escherichia coli]  
**494.** WP\_038038123.1 phage major capsid protein [Thermorudis peleae]  
**495.** HBZ3723017.1 phage major capsid protein [Klebsiella pneumoniae]  
**496.** WP\_064173653.1 hypothetical protein, partial [Klebsiella pneumoniae]  
**497.** MCA1800049.1 phage major capsid protein [Actinomyces bacterium]  
**498.** EFH8991876.1 phage major capsid protein [Escherichia coli]  
**499.** WP\_047963505.1 hypothetical protein [Xenorhabdus khoisanus]  
**500.** QNN97178.1 hypothetical protein [Xanthomonas phage Xp12]

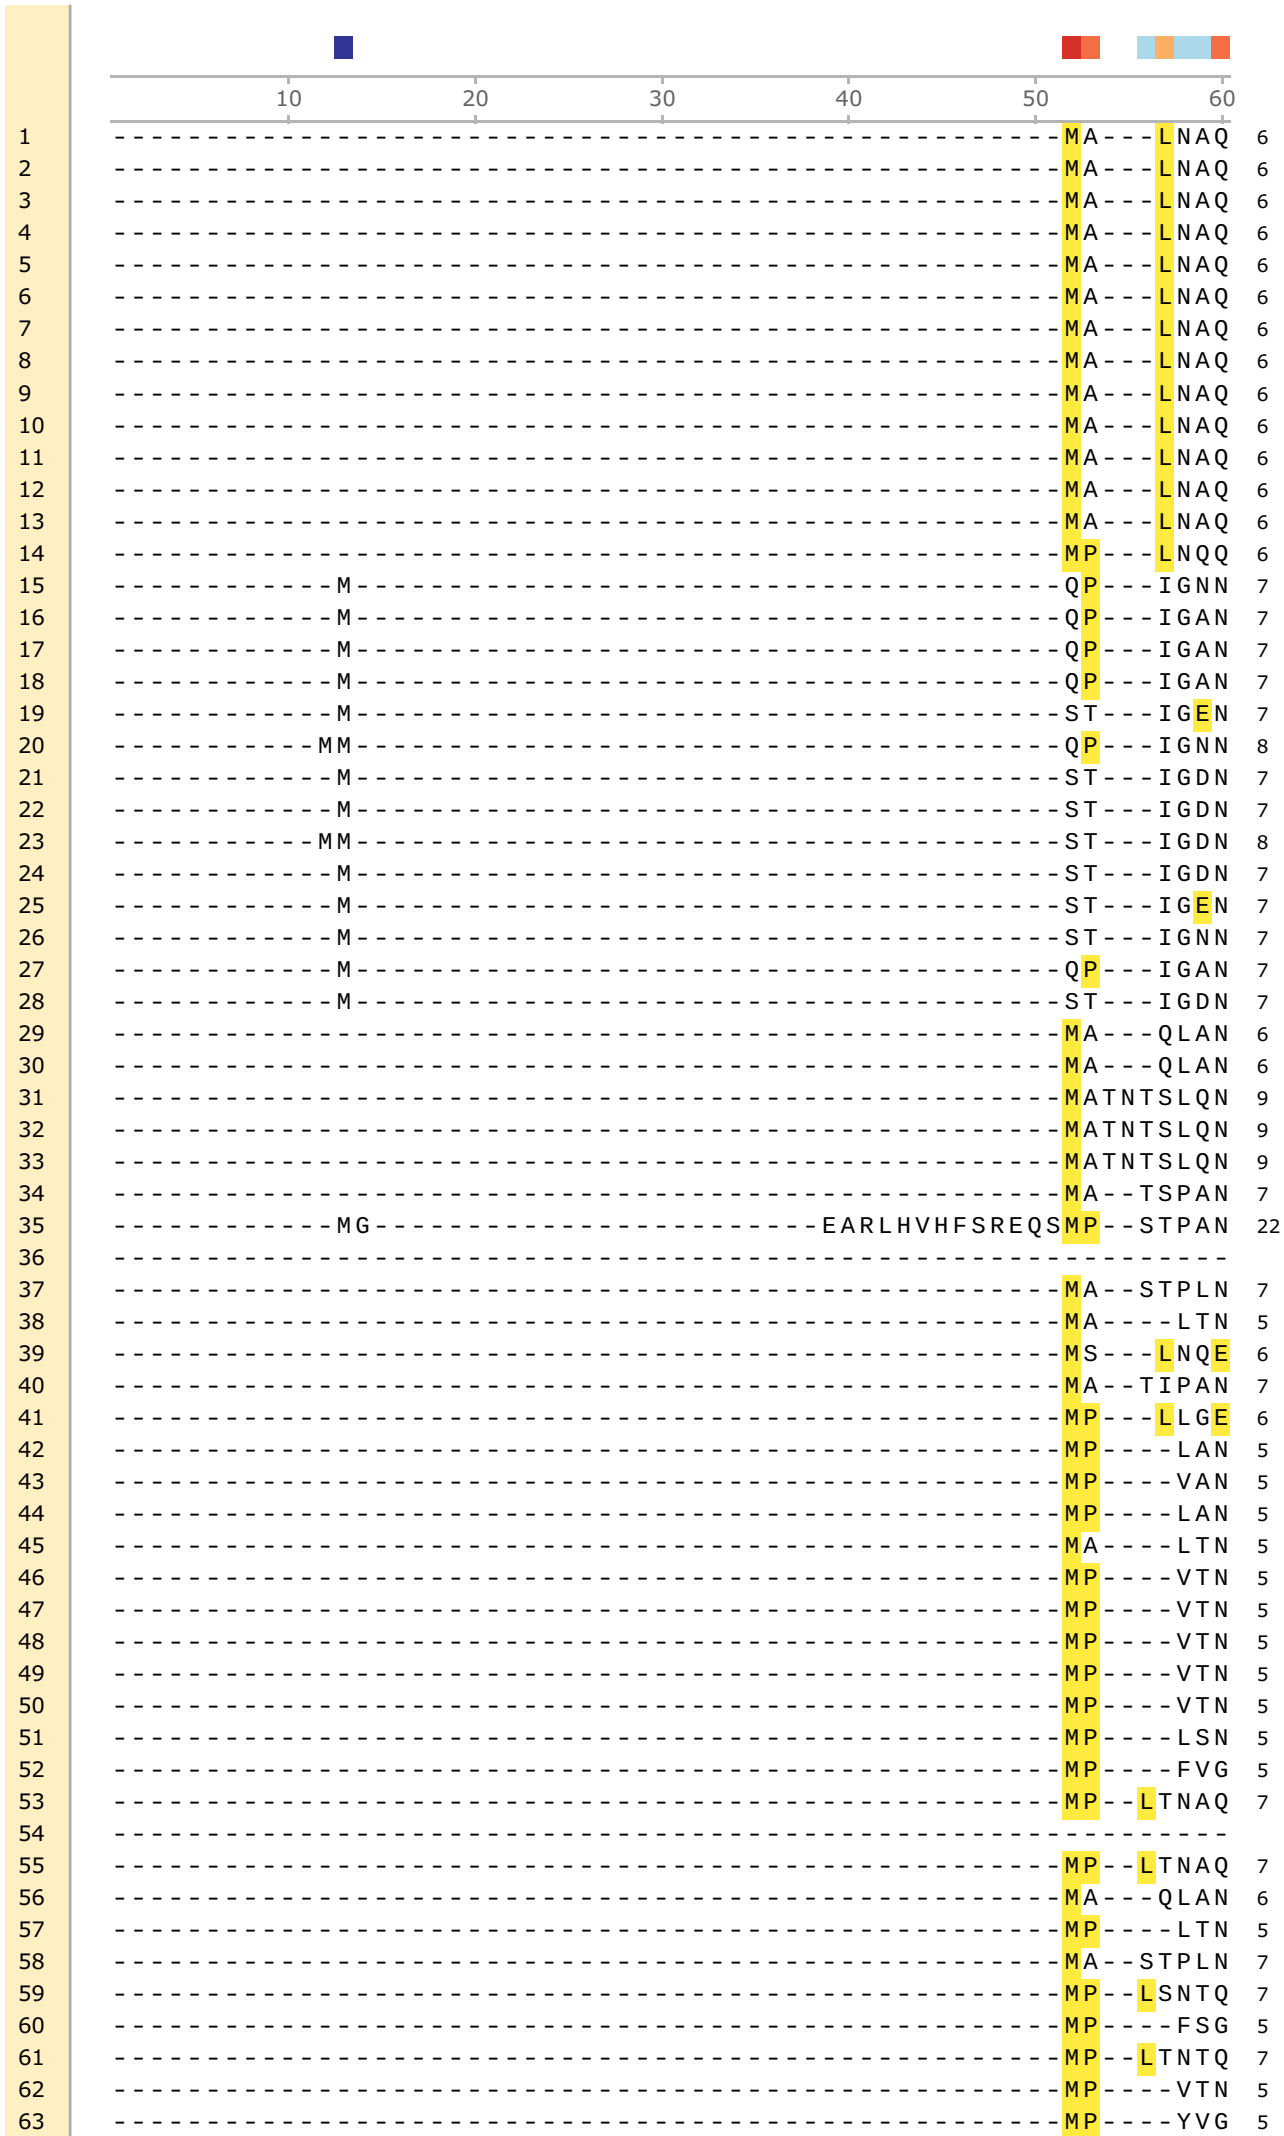



|     |                                                     |    |       |    |
|-----|-----------------------------------------------------|----|-------|----|
| 64  | -----                                               | MP | LTNTQ | 7  |
| 65  | -----                                               | MP | LTNTQ | 7  |
| 66  | -----                                               | MS | LSN   | 5  |
| 67  | -----                                               | MP | AQN   | 5  |
| 68  | -----                                               | MP | LSPAQ | 7  |
| 69  | -----MAN-----WQFRKENIEERER                          | MP | LSPAQ | 23 |
| 70  | -----                                               | MS | LGSF  | 6  |
| 71  | MRLHNLRMVAKMMRNVFMILVMNQVDIFFLGGVDFYHIESPALSTFFVGVM | MS | LGSF  | 57 |
| 72  | -----MRMVAKMMRNVFMILVMNQVDIFFLGGVDFYHIESPALSTFFVGVM | MS | LGSF  | 52 |
| 73  | -----                                               | MS | LGGF  | 6  |
| 74  | -----                                               | MP | LLRTT | 7  |
| 75  | -----                                               | MP | VTN   | 5  |
| 76  | -----                                               |    |       |    |
| 77  | -----                                               | ML | FSG   | 5  |
| 78  | -----                                               | MP | LLVTE | 7  |
| 79  | -----                                               | MA | QLAN  | 6  |
| 80  | -----                                               | MP | LLKEE | 7  |
| 81  | -----                                               | MA | LLRVE | 7  |
| 82  | -----                                               | MP | LLREV | 7  |
| 83  | -----                                               | MP | LLMDE | 7  |
| 84  | -----                                               | MP | LLIEE | 7  |
| 85  | -----                                               | MP | LLIEE | 7  |
| 86  | -----                                               | MP | LLIDE | 7  |
| 87  | -----                                               | MP | TSG   | 5  |
| 88  | -----                                               |    |       |    |
| 89  | -----                                               | MP | LLIEE | 7  |
| 90  | -----                                               | MP | LLVEE | 7  |
| 91  | -----                                               |    |       |    |
| 92  | -----                                               | MP | TSG   | 5  |
| 93  | -----                                               | MP | TSG   | 5  |
| 94  | -----                                               | MP | LLVQE | 7  |
| 95  | -----                                               | MP | LLITE | 7  |
| 96  | -----                                               | MP | LLRVE | 7  |
| 97  | -----                                               | MP | LLVEE | 7  |
| 98  | -----                                               | MP | LLREV | 7  |
| 99  | -----                                               | MP | LLREE | 7  |
| 100 | -----                                               | MP | LLRTV | 7  |
| 101 | -----                                               | MG | LLRAD | 7  |
| 102 | -----                                               | MA | TLGSA | 7  |
| 103 | -----                                               | MP | LLREV | 7  |
| 104 | -----                                               | MP | LLREE | 7  |
| 105 | -----                                               | MP | LLREE | 7  |
| 106 | -----                                               |    | LLREE | 5  |
| 107 | -----                                               | MP | LLKVE | 7  |
| 108 | -----                                               | MP | LLREE | 7  |
| 109 | -----                                               | MP | LLREE | 7  |
| 110 | -----                                               | MP | LLREE | 7  |
| 111 | -----                                               | MP | LLKVE | 7  |
| 112 | -----LL-----                                        | MP | LLREE | 9  |
| 113 | -----                                               | MP | LLREE | 7  |
| 114 | -----                                               | MP | LLREE | 7  |
| 115 | -----                                               | MP | LMRDI | 7  |
| 116 | -----                                               | MP | LLRAE | 7  |
| 117 | -----                                               | MP | LLREE | 7  |
| 118 | -----                                               | MP | LLREE | 7  |
| 119 | -----                                               | MP | LLRAE | 7  |
| 120 | -----                                               | MP | LLKVE | 7  |
| 121 | -----                                               | MP | LLREE | 7  |
| 122 | -----                                               | MP | LLREE | 7  |
| 123 | -----                                               | MP | LLREE | 7  |
| 124 | -----                                               | MP | LLREE | 7  |
| 125 | -----                                               | MP | LLREE | 7  |
| 126 | -----                                               | MP | LLREE | 7  |
| 127 | -----                                               | MP | LLVEE | 7  |
| 128 | -----                                               | MP | LLVEE | 7  |
| 129 | -----                                               | MP | LLQAE | 7  |
| 130 | -----                                               | MP | LLQAE | 7  |

|     |             |    |       |   |
|-----|-------------|----|-------|---|
| 131 | -----       | MP | LLQAE | 7 |
| 132 | -----       | MP | LLREE | 7 |
| 133 | -----M----- | AS | ITFVE | 8 |
| 134 | -----       | MP | LLQAE | 7 |
| 135 | -----       | MP | LLREE | 7 |
| 136 | -----       | MP | LLKEE | 7 |
| 137 | -----       | MP | LLRVE | 7 |
| 138 | -----       | MP | LLRQE | 7 |
| 139 | -----       | MP | LLETE | 7 |
| 140 | -----       | MP | LLIDE | 7 |
| 141 | -----       | MP | LLKVE | 7 |
| 142 | -----       | MP | LLAAE | 7 |
| 143 | -----       | MP | LLIDE | 7 |
| 144 | -----       | MP | LLTTE | 7 |
| 145 | -----       | MP | LLKVE | 7 |
| 146 | -----       | MP | LLRVE | 7 |
| 147 | -----       | MP | LLRDE | 7 |
| 148 | -----       | MP | LLRDE | 7 |
| 149 | -----       | MP | LLRDE | 7 |
| 150 | -----       | MP | LLRDE | 7 |
| 151 | -----       | MP | LLREE | 7 |
| 152 | -----       | MP | LLRDE | 7 |
| 153 | -----       | MP | LLTTE | 7 |
| 154 | -----       | MP | LLREE | 7 |
| 155 | -----       | MP | LLREE | 7 |
| 156 | -----       | MP | LLRDE | 7 |
| 157 | -----       | MP | LLRDE | 7 |
| 158 | -----       | MP | LLREE | 7 |
| 159 | -----       | MP | LLREE | 7 |
| 160 | -----       | MP | LLREE | 7 |
| 161 | -----       | MP | LLREE | 7 |
| 162 | -----       | MP | LLIDE | 7 |
| 163 | -----       | MP | LLREE | 7 |
| 164 | -----       | MP | LLRDE | 7 |
| 165 | -----       | MP | LLRDE | 7 |
| 166 | -----       | MP | LLRDE | 7 |
| 167 | -----       | MP | LLRDE | 7 |
| 168 | -----       | MP | LLRDE | 7 |
| 169 | -----       | MP | LLRDE | 7 |
| 170 | -----       | MP | LLREE | 7 |
| 171 | -----       | MP | LLRDE | 7 |
| 172 | -----       | MP | LLREE | 7 |
| 173 | -----       | MP | LLREE | 7 |
| 174 | -----       | MP | LLREE | 7 |
| 175 | -----       | MP | LLREE | 7 |
| 176 | -----       | MP | LLRDE | 7 |
| 177 | -----       | MP | LLREE | 7 |
| 178 | -----       | MP | LLREE | 7 |
| 179 | -----       | MP | LLREE | 7 |
| 180 | -----       | MP | LLRDE | 7 |
| 181 | -----       | MP | LLREE | 7 |
| 182 | -----       | MP | LLREE | 7 |
| 183 | -----       | MP | LLREE | 7 |
| 184 | -----       | MP | LLREE | 7 |
| 185 | -----       | MP | LLREE | 7 |
| 186 | -----       | MP | LLREE | 7 |
| 187 | -----       | MP | LLREE | 7 |
| 188 | -----       | MP | LLREE | 7 |
| 189 | -----       | MP | LLREE | 7 |
| 190 | -----       | MP | LSKTE | 7 |
| 191 | -----       | MP | LLREE | 7 |
| 192 | -----       | MP | LLVEE | 7 |
| 193 | -----       | MP | LLREE | 7 |
| 194 | -----       | MP | LLREE | 7 |
| 195 | -----       | MP | LLREE | 7 |
| 196 | -----       | MP | LLREE | 7 |
| 197 | -----       | MP | LLREE | 7 |

|     |       |    |       |   |
|-----|-------|----|-------|---|
| 198 | ----- | MP | LLREE | 7 |
| 199 | ----- | MP | LLREE | 7 |
| 200 | ----- | MP | LLREE | 7 |
| 201 | ----- | MP | LLREE | 7 |
| 202 | ----- | MP | LLVEE | 7 |
| 203 | ----- | MP | LLREE | 7 |
| 204 | ----- | MA | LLRVE | 7 |
| 205 | ----- | MP | LLREE | 7 |
| 206 | ----- | MP | LLREE | 7 |
| 207 | ----- | MP | LLREE | 7 |
| 208 | ----- | MP | LLREE | 7 |
| 209 | ----- | MP | LLREE | 7 |
| 210 | ----- | MP | LLREE | 7 |
| 211 | ----- | MP | LLREE | 7 |
| 212 | ----- | MP | LLREE | 7 |
| 213 | ----- | MP | LLREE | 7 |
| 214 | ----- | MP | LLREE | 7 |
| 215 | ----- | MP | LLREE | 7 |
| 216 | ----- | MP | LLREE | 7 |
| 217 | ----- | MP | LLREE | 7 |
| 218 | ----- | MP | LLREE | 7 |
| 219 | ----- | MP | LLREE | 7 |
| 220 | ----- | MP | LLREE | 7 |
| 221 | ----- | MP | LLREE | 7 |
| 222 | ----- | MP | LLREE | 7 |
| 223 | ----- | MP | LLREE | 7 |
| 224 | ----- | MP | LLREE | 7 |
| 225 | ----- | MP | LLREE | 7 |
| 226 | ----- | MP | LLREE | 7 |
| 227 | ----- | MP | LLREE | 7 |
| 228 | ----- | MP | LLRAE | 7 |
| 229 | ----- | MP | LLREE | 7 |
| 230 | ----- | MP | LLRAE | 7 |
| 231 | ----- | MP | LLREE | 7 |
| 232 | ----- | MP | LLREE | 7 |
| 233 | ----- | MP | LLREE | 7 |
| 234 | ----- | MP | LLREE | 7 |
| 235 | ----- | MP | LLREE | 7 |
| 236 | ----- | MP | LLREE | 7 |
| 237 | ----- | MP | LLREE | 7 |
| 238 | ----- | MP | LLREE | 7 |
| 239 | ----- | MA | LTKEE | 7 |
| 240 | ----- | MP | LLREE | 7 |
| 241 | ----- | MP | LLRDE | 7 |
| 242 | ----- | MP | LLREE | 7 |
| 243 | ----- | MP | LLREE | 7 |
| 244 | ----- | MP | LLREE | 7 |
| 245 | ----- | MP | VLREE | 7 |
| 246 | ----- | MP | LLREE | 7 |
| 247 | ----- | MP | LLREE | 7 |
| 248 | ----- | MP | LLREE | 7 |
| 249 | ----- | MP | LLREE | 7 |
| 250 | ----- | MP | LLREE | 7 |
| 251 | ----- | MP | LLRDE | 7 |
| 252 | ----- | MP | LLREE | 7 |
| 253 | ----- | MP | LLREE | 7 |
| 254 | ----- | MP | LLREE | 7 |
| 255 | ----- | MP | LLREE | 7 |
| 256 | ----- | MP | LLRDE | 7 |
| 257 | ----- | MP | LLRDE | 7 |
| 258 | ----- | MP | LLREE | 7 |
| 259 | ----- | MP | LLREE | 7 |
| 260 | ----- | MP | LLREE | 7 |
| 261 | ----- | MP | LLREE | 7 |
| 262 | ----- | MP | LLRDE | 7 |
| 263 | ----- | MP | LLREE | 7 |
| 264 | ----- | MP | LLRDE | 7 |

|     |       |    |       |   |
|-----|-------|----|-------|---|
| 265 | ----- | MP | LLREE | 7 |
| 266 | ----- | MP | LLREE | 7 |
| 267 | ----- | MP | LLREE | 7 |
| 268 | ----- | MP | LLREE | 7 |
| 269 | ----- | MP | LLRDE | 7 |
| 270 | ----- | MP | LLRAE | 7 |
| 271 | ----- | MP | LLREE | 7 |
| 272 | ----- | MP | LLREE | 7 |
| 273 | ----- | MP | LLREE | 7 |
| 274 | ----- | MP | LLREE | 7 |
| 275 | ----- | MP | LLRDE | 7 |
| 276 | ----- | MP | LLREE | 7 |
| 277 | ----- | MP | LLRDE | 7 |
| 278 | ----- | MP | LLREE | 7 |
| 279 | ----- | MP | LLREE | 7 |
| 280 | ----- | MP | LLREE | 7 |
| 281 | ----- | MP | LLREE | 7 |
| 282 | ----- | MP | LLREE | 7 |
| 283 | ----- | MP | LLREE | 7 |
| 284 | ----- | MP | LLREE | 7 |
| 285 | ----- | MP | LLREE | 7 |
| 286 | ----- | MP | LLRDE | 7 |
| 287 | ----- | MP | LLREE | 7 |
| 288 | ----- | MP | LLRDE | 7 |
| 289 | ----- | MP | LLREE | 7 |
| 290 | ----- | MP | LLRDE | 7 |
| 291 | ----- | MP | LLREE | 7 |
| 292 | ----- | MP | LLREE | 7 |
| 293 | ----- | MP | LLREE | 7 |
| 294 | ----- | MP | LLREE | 7 |
| 295 | ----- | MP | LLREE | 7 |
| 296 | ----- | MP | LLREE | 7 |
| 297 | ----- | MP | LLREE | 7 |
| 298 | ----- | MP | LLREE | 7 |
| 299 | ----- | MP | LLREE | 7 |
| 300 | ----- |    | -E    | 1 |
| 301 | ----- | MP | LLREE | 7 |
| 302 | ----- | MP | LLREE | 7 |
| 303 | ----- | MP | LLRDE | 7 |
| 304 | ----- | MP | LLREE | 7 |
| 305 | ----- | MP | LLREE | 7 |
| 306 | ----- | MP | LLREE | 7 |
| 307 | ----- | MP | LLRDE | 7 |
| 308 | ----- | MP | LLREE | 7 |
| 309 | ----- | MP | LLRDE | 7 |
| 310 | ----- | MP | LLRDE | 7 |
| 311 | ----- | MP | LLRDE | 7 |
| 312 | ----- | MP | LLREE | 7 |
| 313 | ----- | MP | LLREE | 7 |
| 314 | ----- | MP | LLRDE | 7 |
| 315 | ----- | MP | LLREE | 7 |
| 316 | ----- | MP | LLREE | 7 |
| 317 | ----- | MP | LLRDE | 7 |
| 318 | ----- | MP | LLREE | 7 |
| 319 | ----- | MP | LLREE | 7 |
| 320 | ----- | MP | LLRDE | 7 |
| 321 | ----- | MP | LLREE | 7 |
| 322 | ----- | MP | LLRDE | 7 |
| 323 | ----- | MP | LLRDE | 7 |
| 324 | ----- | MP | LLREE | 7 |
| 325 | ----- | MP | LLREE | 7 |
| 326 | ----- | MP | LLREE | 7 |
| 327 | ----- | MP | LLREE | 7 |
| 328 | ----- | MP | LLREE | 7 |
| 329 | ----- | MP | LLRDE | 7 |
| 330 | ----- | MP | LLRDE | 7 |
| 331 | ----- | MP | LLREE | 7 |



|     |             |    |       |   |
|-----|-------------|----|-------|---|
| 332 | -----       | MP | LLRDE | 7 |
| 333 | -----       | MP | LLRDE | 7 |
| 334 | -----       | MP | LLRDE | 7 |
| 335 | -----       | MP | LLRDE | 7 |
| 336 | -----       | MP | LLREE | 7 |
| 337 | -----       | MP | LLRDE | 7 |
| 338 | -----       | MP | LLREE | 7 |
| 339 | -----       | MP | LLRDE | 7 |
| 340 | -----       | MP | LLREE | 7 |
| 341 | -----       | MP | LLRDE | 7 |
| 342 | -----       | MP | LLREE | 7 |
| 343 | -----       | MP | LLRDE | 7 |
| 344 | -----       | MP | LLRDE | 7 |
| 345 | -----       | MP | LLREE | 7 |
| 346 | -----       | MP | LLRDE | 7 |
| 347 | -----       | MP | LLREE | 7 |
| 348 | -----       | MP | LLREE | 7 |
| 349 | -----       | MP | LLRDE | 7 |
| 350 | -----       | MP | LLRDE | 7 |
| 351 | -----       |    |       |   |
| 352 | -----       | MP | LLRDE | 7 |
| 353 | -----M----- | SS | VTLL  | 8 |
| 354 | -----       |    | LLREE | 4 |
| 355 | -----       | MP | LLRDE | 7 |
| 356 | -----       | MP | LLRDE | 7 |
| 357 | -----       | MP | LLREE | 7 |
| 358 | -----       | MP | LLRDE | 7 |
| 359 | -----       | MP | LLREE | 7 |
| 360 | -----       | MP | LLRDE | 7 |
| 361 | -----       | MP | LLREE | 7 |
| 362 | -----       | MP | LLREE | 7 |
| 363 | -----       | MP | LLRDE | 7 |
| 364 | -----       | MP | LLRDE | 7 |
| 365 | -----       | MP | LLRDE | 7 |
| 366 | -----       | MP | LLRDE | 7 |
| 367 | -----       | MP | LLREE | 7 |
| 368 | -----       | MP | LLREE | 7 |
| 369 | -----       | MP | LLRDE | 7 |
| 370 | -----       | MP | LLRDE | 7 |
| 371 | -----       | MP | LLRDE | 7 |
| 372 | -----       | MP | LLRDE | 7 |
| 373 | -----       | MP | LLRDE | 7 |
| 374 | -----       | MP | LLRDE | 7 |
| 375 | -----       | MP | LLRDE | 7 |
| 376 | -----       | MP | LLREE | 7 |
| 377 | -----       | MA | LTKE  | 7 |
| 378 | -----       | MP | LLRDE | 7 |
| 379 | -----       | MP | LLRDE | 7 |
| 380 | -----       | MP | LLREE | 7 |
| 381 | -----       | MP | LLREE | 7 |
| 382 | -----M----- | AS | VTLAE | 8 |
| 383 | -----       | MP | LLREE | 7 |
| 384 | -----       | MP | LLREE | 7 |
| 385 | -----       | MP | LLRDE | 7 |
| 386 | -----       | MP | LLREE | 7 |
| 387 | -----       | MP | LLQAV | 7 |
| 388 | -----       | MP | LLREE | 7 |
| 389 | -----       | MP | LLREE | 7 |
| 390 | -----M----- | AS | ITFAE | 8 |
| 391 | -----       | MP | LLREE | 7 |
| 392 | -----       | MP | LLRDE | 7 |
| 393 | -----       | MP | LLRDE | 7 |
| 394 | -----       | MP | LLREE | 7 |
| 395 | -----       | MP | LLREE | 7 |
| 396 | -----       | MP | LLREE | 7 |
| 397 | -----M----- | SS | VTLAE | 8 |
| 398 | -----       | MP | LLREE | 7 |

|     |             |    |       |   |
|-----|-------------|----|-------|---|
| 399 | -----       | MP | LLRDE | 7 |
| 400 | -----       | MP | LLREE | 7 |
| 401 | -----       | MP | LLREE | 7 |
| 402 | -----       | MP | LLREE | 7 |
| 403 | -----       | MP | LLREE | 7 |
| 404 | -----       | MP | LLREE | 7 |
| 405 | -----       | MP | LLREE | 7 |
| 406 | -----       | MP | LLREE | 7 |
| 407 | -----       | MP | LLREE | 7 |
| 408 | -----       | MP | LLRDE | 7 |
| 409 | -----       | MP | LLREE | 7 |
| 410 | -----       | MP | LLREE | 7 |
| 411 | -----       | MP | LLREE | 7 |
| 412 | -----       | MP | LLREE | 7 |
| 413 | -----       | MP | LLREE | 7 |
| 414 | -----       | MP | LLREE | 7 |
| 415 | -----       | MP | LLREE | 7 |
| 416 | -----       | MP | LLREE | 7 |
| 417 | -----       | MP | LLREE | 7 |
| 418 | -----       | MP | LLRDE | 7 |
| 419 | -----       | MS | LLVEE | 7 |
| 420 | -----       | MP | LLREE | 7 |
| 421 | -----       | MP | LLREE | 7 |
| 422 | -----       | MP | LLREE | 7 |
| 423 | -----       | MP | LLREE | 7 |
| 424 | -----       | MP | LLREE | 7 |
| 425 | -----       | MP | LLREE | 7 |
| 426 | -----       | MP | LLREE | 7 |
| 427 | -----       | MP | LLREE | 7 |
| 428 | -----       | MP | LLREE | 7 |
| 429 | -----       | MP | LLREE | 7 |
| 430 | -----       | MP | LLREE | 7 |
| 431 | -----       | MP | LLREE | 7 |
| 432 | -----M----- | PS | VTLTE | 8 |
| 433 | -----       | MP | LLREE | 7 |
| 434 | -----       | MP | LLREE | 7 |
| 435 | -----       | MP | LLREE | 7 |
| 436 | -----       | MP | LLREE | 7 |
| 437 | -----       | MP | LLREE | 7 |
| 438 | -----       | MP | LLREE | 7 |
| 439 | -----       | MP | LLRAE | 7 |
| 440 | -----       | MP | LLREE | 7 |
| 441 | -----       | MA | LTKVE | 7 |
| 442 | -----       | MP | LLREE | 7 |
| 443 | -----       | MP | LLREE | 7 |
| 444 | -----M----- | PS | VILSE | 8 |
| 445 | -----M----- | AS | VTLAE | 8 |
| 446 | -----       | MP | LLREE | 7 |
| 447 | -----       | MP | LLREE | 7 |
| 448 | -----       | -  | MTKVE | 5 |
| 449 | -----       | MP | LLREE | 7 |
| 450 | -----       | MP | LLREE | 7 |
| 451 | -----       | MA | LTKVE | 7 |
| 452 | -----       | MA | LTKVE | 7 |
| 453 | -----       | MP | LLREE | 7 |
| 454 | -----M----- | SS | VTLAE | 8 |
| 455 | -----       | MP | LLQAE | 7 |
| 456 | -----       | MP | LLREE | 7 |
| 457 | -----       | MP | LLREE | 7 |
| 458 | -----       | MP | LLREE | 7 |
| 459 | -----       | MP | LLKAT | 7 |
| 460 | -----       | MP | LLREE | 7 |
| 461 | -----M----- | AS | VTLAE | 8 |
| 462 | -----       | MP | LLREE | 7 |
| 463 | -----       |    |       |   |
| 464 | -----       | MP | LLREE | 7 |
| 465 | -----       | MP | LLREE | 7 |

|     |             |           |   |
|-----|-------------|-----------|---|
| 466 | -----       | MP--LLREE | 7 |
| 467 | -----       | MP--LLREE | 7 |
| 468 | -----       | MP--LLREE | 7 |
| 469 | -----       | MP--LLREE | 7 |
| 470 | -----       | MP--LLREE | 7 |
| 471 | -----M----- | AS--VTLVE | 8 |
| 472 | -----       | MP--LLRTE | 7 |
| 473 | -----M----- | AS--VTLVE | 8 |
| 474 | -----       | MP--LLREE | 7 |
| 475 | -----       | MP--LLRDE | 7 |
| 476 | -----M----- | AS--VTLAE | 8 |
| 477 | -----M----- | AT--ITLAE | 8 |
| 478 | -----M----- | PS--NPLIE | 8 |
| 479 | -----M----- | AS--VTLTE | 8 |
| 480 | -----M----- | AS--VTLAE | 8 |
| 481 | -----       | MP--LLREE | 7 |
| 482 | -----       | MP--LLREE | 7 |
| 483 | -----       | MP--LLREE | 7 |
| 484 | -----       | MP--LLREE | 7 |
| 485 | -----       | MA--LTKVE | 7 |
| 486 | -----       | MP--LLREE | 7 |
| 487 | -----       | MP--LLREE | 7 |
| 488 | -----       | MP--LLREE | 7 |
| 489 | -----       | MP--LLREE | 7 |
| 490 | -----M----- | AS--VTLAE | 8 |
| 491 | -----       | MP--LLREE | 7 |
| 492 | -----M----- | PS--VILSE | 8 |
| 493 | -----       | MP--LLREE | 7 |
| 494 | -----       | MA--LTKLE | 7 |
| 495 | -----       | MP--LLREE | 7 |
| 496 | -----       | MP--LLREE | 7 |
| 497 | -----M----- | AS--VTLAE | 8 |
| 498 | -----       | MP--LLREE | 7 |
| 499 | -----       | MP--LLREE | 7 |
| 500 | -----M----- | AS--VTLAE | 8 |



|    |              |          |               |       |               |       |        |      |     |    |
|----|--------------|----------|---------------|-------|---------------|-------|--------|------|-----|----|
| 1  | AQFLSILELTKG | LL       | ENSPKRLQHLEVF | PF    | HHVEGDSLRYVR  | ----- | TPELTP | ---- | ASI | 56 |
| 2  | AQFLSILELTKG | LL       | ENSPKRLQHLEVF | PF    | HHVEGDSLRYVR  | ----- | TPELTP | ---- | ASI | 56 |
| 3  | AQFLSILELTKG | LL       | ENSPKRLQHLEVF | PF    | HHVEGDSLRYVR  | ----- | TPALTP | ---- | ASI | 56 |
| 4  | AQFLSILELTKG | LL       | ENSPKRLQHLEIF | PF    | HHVEGDSLRYVR  | ----- | TPELTP | ---- | ASI | 56 |
| 5  | AQFLSILELTKG | LL       | ENSPKRLQHLEIF | PF    | HHVEGDSLRYVR  | ----- | TPELTP | ---- | ASI | 56 |
| 6  | AQFLSILELTKG | LL       | ENSPKRLQHLEVF | PF    | HHVEGDSLRYVR  | ----- | TPELTP | ---- | ASI | 56 |
| 7  | AQFLSILELTKG | LL       | ENSPKRLQHLEIF | PF    | HHVEGDSLRYVR  | ----- | TPELTP | ---- | ASI | 56 |
| 8  | AQFLSILELTKG | LL       | ENSPKRLQHLEVF | PF    | HHVEGDSLRYVR  | ----- | TPELTP | ---- | ASI | 56 |
| 9  | AQFLSILELTKG | LL       | ENSPKRLQHLEIF | PF    | HHVEGDSLRYVR  | ----- | TPELTP | ---- | ASI | 56 |
| 10 | AQFLSILELTKG | LL       | ENSPKRLQHLEIF | PF    | HHVEGDSLRYVR  | ----- | TPELTP | ---- | ASI | 56 |
| 11 | AQFLSILELTKG | LL       | ENSPKRLQHLEVF | PF    | HHVEGDSLRYVR  | ----- | TPELTP | ---- | ASI | 56 |
| 12 | AQFLSILELTKG | LL       | ENSPKRLQHLEVF | PF    | HHVEGDSLRYVR  | ----- | TPELTP | ---- | ASI | 56 |
| 13 | AQFLSILELTKG | LL       | ENSPKRLQHLEIF | PF    | HHVEGDSLRYVR  | ----- | TPELTP | ---- | ASI | 56 |
| 14 | VQFLSIDALALG | LI       | ENAPKRMQYLPFF | PF    | YSIKGSALRYVR  | ----- | TPELVP | ---- | AEI | 56 |
| 15 | ARLLSN       | DVLAKWLL | EDFPFRIQL     | STAF  | PLPVAGDALRYAT | ----- | TGPLIP | ---- | GIA | 57 |
| 16 | AQLLSN       | DALAKWL  | IEDFPFRIQL    | SSIF  | PIPVSGHSLRYAA | ----- | TGALTP | ---- | GNA | 57 |
| 17 | AQLLSN       | DALAKWL  | VEDFPFRIQL    | SSIF  | PIPVSGHSLRYAT | ----- | TDALMP | ---- | GNA | 57 |
| 18 | AQLLAN       | DALAKWL  | IEDFPFRIQL    | SSIF  | PLPVAGDSFRYAT | ----- | TGLLNP | ---- | GST | 57 |
| 19 | ARLLSN       | DVQAKWL  | IEDFPFRIQL    | ASVLP | PLPVAGDALRYTT | ----- | TPVLQP | ---- | GVT | 57 |
| 20 | ARLLSN       | DVLAKWLL | EDFPFRIQL     | STAF  | PLIAGDALRYAT  | ----- | TGPLTP | ---- | GVT | 58 |
| 21 | ARLLSN       | DVQAKWL  | IEDFPFRIQL    | ASVFP | YPVAGDALRYTT  | ----- | TPVLQP | ---- | GVT | 57 |
| 22 | ARLLSN       | DVQAKWL  | IEDFPFRIQL    | ASVFP | CPVAGDALRYTT  | ----- | TPILQP | ---- | GVM | 57 |
| 23 | ARLLSN       | DVQAKWL  | IEDFPFRIQL    | ASVFP | YPVAGDALRYTT  | ----- | TPVLQP | ---- | GVT | 58 |
| 24 | ARLLSN       | DVQAKWL  | IEDFPFRIQL    | ASALP | YPVAGDALRYTT  | ----- | TPVLQP | ---- | GVT | 57 |
| 25 | ARLLSN       | DVQAKWL  | IEDFPFRIQL    | ASVLP | LPVAGDALRYTT  | ----- | TSVLQP | ---- | GVT | 57 |
| 26 | ARLLSN       | DVQAKWL  | IEDFPFRIQL    | ASVFP | YPVAGDALRYTT  | ----- | TPVLQP | ---- | GVT | 57 |

|    |                |                                               |                       |                     |            |             |          |    |
|----|----------------|-----------------------------------------------|-----------------------|---------------------|------------|-------------|----------|----|
| 27 | AQLLSNDVLA     | KWLIEDFPFRIQLSSIFPFLSVSGHSLRYAT               | -----TGPLIP           | ----                | GAA        | 57          |          |    |
| 28 | ARLLSNDVQAKWL  | IEDFPFRIQLASALPFYPVAGDALRYTT                  | -----TPVLQP           | ----                | GVT        | 57          |          |    |
| 29 | ADLLTLRDLWLPWL | VENFPWKIQIAHWPFFMGIDGGFLRVAR                  | -----TARFDQ           | ----                | TDL        | 56          |          |    |
| 30 | ADLLTLRDLWLPWL | VENFPWKIQIAHWPFFMGIDGGFLRVAR                  | TARFDQTARFDQ          | ----                | TDL        | 62          |          |    |
| 31 | ADRLVLTDQWQWL  | IENFPWKLQIARFWPFMGIYGGFLRVPR                  | -----TNQFDK           | ----                | SEL        | 59          |          |    |
| 32 | ADRLVLTDQWQWL  | IENFPWKLQIARFWPFTGIHGGFLRVAR                  | -----TNLIDK           | ----                | SDL        | 59          |          |    |
| 33 | ADRLVLTDQWQWL  | IENFPWKLQIARFWPFMGIHGGFLRVAR                  | -----TNQISN           | ----                | ADL        | 59          |          |    |
| 34 | STNLTQDQLAKWL  | IEDAPYKIQIARVWPFMGIQGGKISYAR                  | -----TAALES           | LANIDDM             | 61         |             |          |    |
| 35 | AVNLTQEQLSKFLL | ETIEYKLQIMQIWPFMGMVLGGKLYER                   | -----TNQLEA           | IADINNM             | 76         |             |          |    |
| 36 |                |                                               |                       |                     |            |             |          |    |
| 37 | SINLTQDQLAKWL  | IEDMPYRIQIARIFPFMGIQGGKISYAR                  | -----TPALEA           | VADINDM             | 61         |             |          |    |
| 38 | VSLLLQKLKQSWL  | IENFPYKLQIPRAWAWKGIEGTQVSFAR                  | -----TPAFNK           | ----                | ASL        | 55          |          |    |
| 39 | ANRLSTNHLLPGL  | QENAPKRLDILKALFLLQITGNALAVVR                  | -----TPALPD           | ----                | ALA        | 56          |          |    |
| 40 | SINLTQDQLAKWL  | IEDAPYKIQIARIWPFMGIQGGKISYAR                  | -----IADLTT           | GFSDTV              | 61         |             |          |    |
| 41 | AQYLSSTD       | ELLPGLLENWSKEIPGLECFPFYEIRGNALTAVA            | -----TDALPD           | ----                | AGT        | 56          |          |    |
| 42 | VSRLQLLLRQAWL  | IENFPHKLQIPRAWVWKAIEGTQVAFAR                  | -----TNRMDP           | ----                | AEL        | 55          |          |    |
| 43 | VERFMQLLRQSWLV | ENFPHKLQIPRRWIWHGIACTRVAFPR                   | -----TNRIDK           | ----                | DNL        | 55          |          |    |
| 44 | VSRLQLLLRQAWL  | IENFPHKLQIPRAWVWKAIEGTQVAFAR                  | -----INRMDP           | ----                | AEL        | 55          |          |    |
| 45 | VSMLLQKLKQSWL  | IENFPHKLQIPRAWAWKGIEGTQVSFAR                  | -----TPQLDK           | ----                | ATL        | 55          |          |    |
| 46 | ADLLSDDL       | LALWLVENAPIKIPFFQAWSWQQVAGKSLIYPR             | -----TTALAP           | ----                | ASV        | 55          |          |    |
| 47 | ADLLADDLLALS   | LVENSPVKIPFFQAWIWQEVAGKSLTYAR                 | -----TPLLAP           | ----                | ATE        | 55          |          |    |
| 48 | ADLLSDDL       | LALWLVENAPIKIPFFQAWAWQQVAGKSLIYPR             | -----TTALAP           | ----                | AGV        | 55          |          |    |
| 49 | ADLLSDDL       | LALWLVENAPIKIPFFQAWSWQQVAGKSLIYPR             | -----TTALAP           | ----                | AGV        | 55          |          |    |
| 50 | ADLLSDDL       | LALWLVENAPIKIPFFQAWAWQQVAGKSLIYPR             | -----TTTLSP           | ----                | AGV        | 55          |          |    |
| 51 | AFLLGDSPVARWL  | ENSPVAIPFLDYAWAQGVGQSLTYPR                    | -----ATELTP           | ----                | ASV        | 55          |          |    |
| 52 | AANATTQQATRWLV | ENEPEIIQIHGHFPSQAVQGGFLTYP                    | -----VPKLI            | ----                | ASP        | 55          |          |    |
| 53 | AQLLSEEA       | LLAGLVENDPKRIQLARRLPFYAVGGDRLAVPRV            | -----TSGNLGT          | ----                | AVW        | 59          |          |    |
| 54 | -----MLSKFLL   | EELEYKLQIARIWPFMGMVVGKLYER                    | -----TDQLET           | VANIDSM             | 47         |             |          |    |
| 55 | ALLLSNDAFIKGL  | IEAEPKRIQMISHIFPFIEIDGDKLTVPRV                | -----TSANLGT          | ----                | AIF        | 59          |          |    |
| 56 | ADLLTRRD       | LWPWLVENFPWKIQIARHWPFMGIDGGFLRVAR             | -----TTRFDE           | ----                | TDL        | 56          |          |    |
| 57 | ASLLSENRRTRFIV | ENSPIKLQIARVWPWLGVGDSGNMYAR                   | -----KNAQLT           | ----                | TPV        | 56          |          |    |
| 58 | AVDLTQEQLVKTV  | IEKIIRYKVEIANFWPMRGVIGGKLYAR                  | -----TDQLSA           | -GDINAM             | 60         |             |          |    |
| 59 | ASLLSDEQLLSNL  | VENEPKRIQFALRPFYAIIGGDRLTVPRV                 | -----TAANLGT          | ----                | AVW        | 59          |          |    |
| 60 | ASGTANT        | IATPHAVENEPRLIQIHRRMATKGVPGGTLVYPR            | -----VPALKP           | ----                | ASV        | 55          |          |    |
| 61 | ALLLSNDAFLQGL  | VENDPKRIQMSNLLPFIEIDGDKLTI                    | PRV-----TNANLGT       | ----                | AIW        | 59          |          |    |
| 62 | ADLLSDDL       | LALWLVENAPIKIPFFQAWSWQQVAGKSLIYPR             | -----TTALAP           | ----                | AVM        | 55          |          |    |
| 63 | AQNAV          | NQIATPWLVENDPEIIQVHGHWAQGVPGGLTYAR            | -----VPKLIA           | ----                | ASA        | 55          |          |    |
| 64 | ALLLSNDALLAG   | LVENDPKRIQLSRRLPFYALAGDRLTVPRV                | -----TNANLGT          | ----                | ALW        | 59          |          |    |
| 65 | ALLLSNDAFLQGL  | TENEPRLIQMSHVLEFIEIDGDKLTI                    | PRV-----TSANLGT       | ----                | AIF        | 59          |          |    |
| 66 | AYMLGES        | PVARWLIENTSPINIAFYQAWAWQGVGQSLTYPR            | -----ATELSP           | ----                | AAV        | 55          |          |    |
| 67 | TQFLNSIP       | VARYAVERAPTRIQHLMLWSFQGVAGRELLYAQ             | -----VPQLVA           | ----                | SGQ        | 55          |          |    |
| 68 | GLLLSND        | FLVGRFIEDSPFVIQPAHFLPFIEVPGDSERWST            | -----TAAILP           | ----                | ASA        | 57          |          |    |
| 69 | GLLLSND        | FLVGRFIEDSPFVIQPAHFLPFIEVSGDSERWST            | -----TVAIPP           | ----                | ASP        | 73          |          |    |
| 70 | AQALAE         | EKVAKWLLLENWPVKLQFGLVCPITWVDGKSLKFNSLTD-PAGNP | PIPF----              | AYP                 | 61         |             |          |    |
| 71 | AQALAE         | EKITKWLLLENWPVKLQFGLVCPITWVDGKSLKFNSLTD-AGGNP | MPF----               | AYP                 | 112        |             |          |    |
| 72 | AQALAE         | EKITKWLLLENWPVKLQFGLVCPITWVDGKSLKFNSLTD-AGGNP | MPF----               | AYP                 | 107        |             |          |    |
| 73 | AQALAE         | EKVTRWLLLENWPVKLQFGLVCPITWVDGKSLKFNSLTD-PDGNP | PIPF----              | AYP                 | 61         |             |          |    |
| 74 | AELLSQE        | QMERGIEEIIDKDDLFAVLPFKQVVKGAYVYDR             | -----ELTLSE           | ----                | GDF        | 57          |          |    |
| 75 | ADLLADDLLALWL  | VENSPVKIPFYQAWIWQEVAGKSLTYAR                  | -----TPLLAP           | ----                | ATI        | 55          |          |    |
| 76 |                |                                               |                       |                     |            |             |          |    |
| 77 | APDTAN         | IQAAKWFEVENEPRRIQIHGVMPVFGVNGGFLVYPR          | -----VPAIKP           | ----                | AQV        | 55          |          |    |
| 78 | AAKLSRE        | QFERGVIEEIIDKDELFALFPFMKVEGKTYDYVR            | -----EGTLSE           | ----                | GDF        | 57          |          |    |
| 79 | ADLLTLRDLWLPWL | VENFPWKIQIARHWPFMGINGGFLRVAR                  | -----TARFDE           | ----                | TDL        | 56          |          |    |
| 80 | AAKLSNNDLVAG   | VIEEVIDKEDLLAVLPFTETKGKAYVYNR                 | -----ENFISE           | ----                | AVF        | 57          |          |    |
| 81 | AEKLSNQLVSG    | VIEEIIDKDELFALLPFMGVNGKAYVYNR                 | -----ENTISE           | ----                | GDF        | 57          |          |    |
| 82 | AETLT          | NNDLVAGIVEEIERDDMFAILPFVHTEGKAYVYNR           | -----EKTLAE           | ----                | GVF        | 57          |          |    |
| 83 | AAKLSQEDKARG   | VIEEIIDTESLFALMPFQHVN                         | DKTFTYVR-----EGTLSE   | ----                | GEF        | 57          |          |    |
| 84 | AAKLSQEDKARG   | VIEEIIDTESLFALMPFQHVT                         | DKTFTYVR-----EGTLSE   | ----                | GEF        | 57          |          |    |
| 85 | AAKLSQEDKARG   | VIEEIIDTESLFALMPFQHVT                         | DKTFTYVR-----EGTLSE   | ----                | GEF        | 57          |          |    |
| 86 | AAKLSQEDKARG   | VIEEIIDDES                                    | LFALMPFQHVT           | DKTFTYVR-----EGTLSE | ----       | GEF         | 57       |    |
| 87 | AENAGQN        | FLQPHIVETAPVPMQIARHMPVQFVNGRAKSF              | FAVI-----GKLEP        | ----                | GVA        | 55          |          |    |
| 88 |                |                                               |                       |                     |            |             |          |    |
| 89 | ADKLSQEDKARG   | VIEEIIDTESLFALMPFQHVS                         | DKTFTYVR-----EGTLSE   | ----                | GEF        | 57          |          |    |
| 90 | AAKLSQE        | QMERGVIEEIIDTDELFALIPFMGVNGKAYVYNR            | -----EDTLSE           | ----                | GEF        | 57          |          |    |
| 91 |                |                                               |                       |                     | -----MKYAR | -----SAVLAA | -----ATK | 14 |
| 92 | AENAGQN        | FLQPHIVETAPVPLQIARHMPVRY                      | INGRALSFAVI-----DAMAA | ----                | GVA        | 55          |          |    |
| 93 | AENAGS         | DFLQPHIVETAPVPLQIARHMPVRYVNGRAMSFAVI          | -----GKMOP            | ----                | GIA        | 55          |          |    |



|     |       |       |       |      |      |      |       |       |      |        |       |       |       |      |      |      |     |    |
|-----|-------|-------|-------|------|------|------|-------|-------|------|--------|-------|-------|-------|------|------|------|-----|----|
| 94  | AAKLS | SEADL | LQRGI | IEE  | IIDK | EDLL | AVLP  | PFVRT | DGKS | SYDY   | VR    | ----- | EKTL  | SE   | ---- | AEF  | 57  |    |
| 95  | AEKLS | QEDK  | ARGV  | IEE  | IIDT | ESLF | ALMP  | PFQHV | NDKT | FTTY   | VR    | ----- | EGTL  | SE   | ---- | GEF  | 57  |    |
| 96  | AERLS | SNNQL | VAGI  | IEE  | IIER | DDL  | FAIL  | PF    | TG   | INGK   | AYVY  | NR    | ----- | ENTL | AG   | ---- | ASW | 57 |
| 97  | AAKLS | VNQL  | ERGV  | IEE  | IIDV | DEL  | FALF  | PF    | MQV  | NGK    | AYDY  | IR    | ----- | ESTL | SE   | ---- | GDF | 57 |
| 98  | AEKLS | QEEM  | LRGV  | IEE  | IIDR | DDL  | LALL  | PF    | ARTE | GKAL   | VYIR  | ----- | ELTN  | SE   | ---- | GSF  | 57  |    |
| 99  | AEKLS | QDYLE | RGV   | IEE  | IIDQ | DEM  | FALV  | PF    | MFV  | NGK    | AYDY  | VR    | ----- | EKEL | SE   | ---- | GAF | 57 |
| 100 | AETLS | QEDM  | LRGV  | IEE  | IIHR | DDL  | LALL  | PF    | SRVD | GKAL   | VYIR  | ----- | ELTN  | SE   | ---- | GTF  | 57  |    |
| 101 | AEKLS | NNTLV | QG    | IVEE | LIDR | DEL  | FSLP  | PF    | EQVN | SKAY   | VYNR  | ----- | EKTL  | SE   | ---- | ADF  | 57  |    |
| 102 | AQYLS | RDAL  | AMWL  | LETD | PWRN | ELAA | AVFP  | YMP   | IDGP | ALKV   | AR    | ----- | QTKV  | AI   | ---- | GSL  | 57  |    |
| 103 | AEKLS | QEEM  | LRGV  | IEE  | IIDR | DDL  | LALL  | PF    | ARTE | GKAL   | VYIR  | ----- | ELTN  | SE   | ---- | GSF  | 57  |    |
| 104 | AAKLS | SNNQL | VSGV  | VEE  | IIDK | DEM  | FAFL  | PF    | VG   | VKGK   | AYVY  | NR    | ----- | EKTL | AD   | ---- | ADF | 57 |
| 105 | AEKLS | SNNQL | VQGV  | VEE  | IIDR | DDL  | FAIL  | PF    | TQV  | NGK    | AYVY  | NR    | ----- | EKTL | GG   | ---- | ANW | 57 |
| 106 | AEKLS | SNNQL | VQGV  | VEE  | IIDR | DDL  | FAIL  | PF    | TQV  | NGK    | AYVY  | NR    | ----- | EKTL | GG   | ---- | ANW | 55 |
| 107 | AEKLS | SNNQL | VSGV  | IDEI | IFRD | DM   | FAIL  | PF    | MGV  | NGK    | AYVY  | NR    | ----- | ENTL | GD   | ---- | AEF | 57 |
| 108 | AEKLS | SNNQL | VQGV  | VEE  | IIDR | DDL  | FAIL  | PF    | TQV  | NGK    | AYVY  | NR    | ----- | EKTL | GG   | ---- | ANW | 57 |
| 109 | AEKLS | SNNQL | VQGV  | VEE  | IIDR | DDL  | FAIL  | PF    | TQV  | NGK    | AYVY  | NR    | ----- | EKTL | GG   | ---- | ANW | 57 |
| 110 | AEKLS | SNNQL | VQGV  | VEE  | IIDR | DDL  | FAIL  | PF    | TQV  | NGK    | AYVY  | NR    | ----- | EKTL | GG   | ---- | ANW | 57 |
| 111 | ADKLS | SNNQL | ERGV  | IEE  | VI   | ERDE | L     | FALF  | PF   | MRV    | NSKAY | VYNR  | ----- | ENGL | SG   | ---- | AAF | 57 |
| 112 | AEKLS | SNNQL | VQGV  | VEE  | IIDR | DDL  | FAIL  | PF    | TQV  | NGK    | AYVY  | NR    | ----- | EKTL | GG   | ---- | ANW | 59 |
| 113 | AEKLS | SNNQL | VQGV  | VEE  | IIDR | DDL  | FAIL  | PF    | TQV  | NGK    | AYVY  | NR    | ----- | EKTL | GG   | ---- | ANW | 57 |
| 114 | AEKLS | SNNQL | VQGV  | VEE  | IIDR | DDL  | FAIL  | PF    | TQV  | NGK    | AYVY  | NR    | ----- | EKTL | GG   | ---- | ANW | 57 |
| 115 | AETLS | QEDM  | VRGV  | IEE  | IVHK | DDL  | MALM  | PF    | SRTD | GKAY   | VYVR  | ----- | EKTN  | SE   | ---- | GSF  | 57  |    |
| 116 | AEKLS | SNNQL | LRGV  | ITEI | IIDK | DDM  | FAIL  | PF    | TQV  | NGK    | AYVY  | NR    | ----- | EGEL | AD   | ---- | GQW | 57 |
| 117 | AAKLS | SNNQL | VSGV  | VEE  | IIDK | DEM  | FAFL  | PF    | VG   | VKGK   | AYVY  | NR    | ----- | EKTL | AD   | ---- | ADF | 57 |
| 118 | AAKLS | SNNQL | VSGV  | VEE  | IIDK | DEM  | FAFL  | PF    | VG   | VKGK   | AYVY  | NR    | ----- | EKTL | AD   | ---- | ADF | 57 |
| 119 | AEKLS | SNNQL | LRGV  | ITEI | IIDK | DDM  | FAIL  | PF    | TQV  | NGK    | AYVY  | NR    | ----- | EGEL | AD   | ---- | GQW | 57 |
| 120 | AEKLS | QDQV  | VQG   | IVEE | IFTT | NEMY | NMLP  | FT    | TKV  | SGKAY  | LYKR  | ----- | EGTL  | AT   | ---- | VDY  | 57  |    |
| 121 | AEKLS | SNNQL | VQGV  | VEE  | IIDR | DDL  | FAIL  | PF    | TQV  | NGK    | AYVY  | NR    | ----- | EKTL | GG   | ---- | ANW | 57 |
| 122 | AEKLS | SNNQL | VQGV  | VEE  | IIDR | DDL  | FAIL  | PF    | TQV  | NGK    | AYVY  | NR    | ----- | EKTL | GG   | ---- | ANW | 57 |
| 123 | AEKLS | NNTLV | VAGV  | IDEI | IIER | DDL  | F     | SVLP  | FAV  | NSKAY  | VYNR  | ----- | EATL  | AD   | ---- | ADF  | 57  |    |
| 124 | AEKLS | SNNQL | VQGV  | VEE  | IIDR | DDL  | FAVLP | PF    | VQV  | NGKAY  | VYNR  | ----- | EKTL  | GG   | ---- | ANW  | 57  |    |
| 125 | AEKLS | SNNQL | VQGV  | VEE  | IIDR | DDL  | FAIL  | PF    | TQV  | NGKAY  | VYNR  | ----- | EKTL  | GG   | ---- | ANW  | 57  |    |
| 126 | AEKLS | SNNQL | VQGV  | VEE  | IIDR | DDL  | FAIL  | PF    | TQV  | NGKAY  | VYNR  | ----- | EKTL  | GG   | ---- | ANW  | 57  |    |
| 127 | AAKLS | V     | DQL   | ERGI | IEE  | IVQ  | DDL   | FALF  | PF   | VHV    | NGKAY | DYIR  | ----- | EATL | SE   | ---- | GSF | 57 |
| 128 | AAKLS | V     | DQL   | ERGI | IEE  | IVQ  | DDL   | FALF  | PF   | VHV    | NGKAY | DYIR  | ----- | EATL | SE   | ---- | GAF | 57 |
| 129 | AEKLS | SNNQL | VAGV  | IEE  | IIER | DEL  | FALIP | PF    | IG   | INGKAY | VYDR  | ----- | ENSL  | PT   | ---- | ADF  | 57  |    |
| 130 | AEKLS | SNNQL | VAGV  | IEE  | IIER | DEL  | FALIP | PF    | IG   | INGKAY | VYDR  | ----- | ENTL  | PT   | ---- | ADF  | 57  |    |
| 131 | AEKLS | SNNQL | VAGV  | IEE  | IIER | DEL  | FALIP | PF    | IG   | INGKAY | VYDR  | ----- | ENTL  | PT   | ---- | ADF  | 57  |    |
| 132 | AEKLS | SNNQL | VQGV  | VEE  | IIDR | DDL  | FAIL  | PF    | TQV  | NGKAY  | VYNR  | ----- | EKTL  | GG   | ---- | ANW  | 57  |    |
| 133 | AAKL  | CQDEL | VSG   | LIEN | VITV | NPFY | NILP  | DS    | IDGN | GLTY   | NR    | ----- | EDVL  | GD   | ---- | VQV  | 58  |    |
| 134 | AEKLS | SNNQL | VAGV  | IEE  | IIER | DEL  | FALIP | PF    | IG   | INGKAY | VYDR  | ----- | ENSL  | PT   | ---- | ADF  | 57  |    |
| 135 | AEKLS | SNNQL | VQGV  | VEE  | IIDR | DDL  | FAIL  | PF    | TQV  | NGKAY  | VYNR  | ----- | EKTL  | GG   | ---- | ANW  | 57  |    |
| 136 | AAKLS | SNNQL | EAGV  | ITEI | YTR  | DDL  | FAVLP | PF    | TRV  | NGKAY  | VYNR  | ----- | ENEL  | AT   | ---- | ADW  | 57  |    |
| 137 | AEKLS | SNNV  | LEQGV | IEE  | IIDN | DAM  | FAMLP | PF    | KRV  | VGKAY  | MYNR  | ----- | EKTL  | SE   | ---- | GEF  | 57  |    |
| 138 | AETLS | SNNQL | VAGV  | IDQI | IIDR | DDL  | FAIL  | PF    | ERV  | NGKAY  | VYNR  | ----- | EDTL  | GG   | ---- | ADW  | 57  |    |
| 139 | ANKLS | ESLM  | ERGV  | IEE  | IIDR | EAL  | FALF  | PF    | KTVD | GKAY   | LYHR  | ----- | ENTI  | SE   | ---- | GDF  | 57  |    |
| 140 | AKKLS | NNNE  | LEQGI | IIET | IIDR | EEL  | FAVLP | PF    | MKV  | NSKAY  | LYNR  | ----- | EKEL  | SE   | ---- | ASF  | 57  |    |
| 141 | ADKLS | NNDL  | VRGV  | IEE  | VIDR | DDL  | FAVLP | PF    | TRTD | GKAY   | VYNR  | ----- | ENG   | VVE  | ---- | AEF  | 57  |    |
| 142 | AAKLS | I     | EDRQ  | RGV  | IEE  | IKDD | ALFAL | LP    | VG   | VTDE   | VSYVR | ----- | EATL  | AQ   | ---- | GAF  | 57  |    |
| 143 | AKKLS | NNNE  | LEQGI | IIET | IIDR | EEL  | FAVLP | PF    | MKV  | NSKAY  | LYNR  | ----- | EKEL  | SE   | ---- | ASF  | 57  |    |
| 144 | AEKLS | QEDM  | ERGV  | IEE  | IIDK | DEL  | FALV  | PF    | MHV  | TDKTY  | TYVR  | ----- | EGNL  | PS   | ---- | AEF  | 57  |    |
| 145 | AEKL  | SEEFM | ERGV  | IEE  | IIDR | DEL  | FQFL  | PF    | MGV  | DNKAY  | TYNR  | ----- | EGTL  | SE   | ---- | GQF  | 57  |    |
| 146 | AEKLS | NNI   | LEQGV | IEE  | IIDN | DAM  | FALL  | PF    | KRIV | GKAY   | VYNR  | ----- | EKSL  | SE   | ---- | GAF  | 57  |    |
| 147 | AEKLS | NNNE  | LEQGV | IIET | IIDR | DDL  | FAVLP | PF    | MKID | SKAY   | LYNR  | ----- | EATL  | SE   | ---- | ATF  | 57  |    |
| 148 | AEKLS | NNNE  | LEQGV | IIET | IIDR | DDL  | FAVLP | PF    | MKID | SKAY   | LYNR  | ----- | EATL  | SE   | ---- | ATF  | 57  |    |
| 149 | AEKLS | NNNE  | LEQGV | IIET | IIDR | DDL  | FAVLP | PF    | MKID | SKAY   | LYNR  | ----- | EATL  | SE   | ---- | ATF  | 57  |    |
| 150 | AEKLS | NNNE  | LEQGV | IIET | IIDR | DDL  | FAVLP | PF    | MKID | SKAY   | LYNR  | ----- | EATL  | SE   | ---- | ATF  | 57  |    |
| 151 | AEKLS | NNNE  | LEQGV | IIET | IIDR | DDL  | FAIL  | PF    | MKIN | SKAY   | LYNR  | ----- | EATL  | SE   | ---- | ATF  | 57  |    |
| 152 | AEKLS | NNNE  | LEQGV | IIET | IIDR | DDL  | FAVLP | PF    | MKID | SKAY   | LYNR  | ----- | EATL  | SE   | ---- | ATF  | 57  |    |
| 153 | AEKLS | QEDM  | ERGV  | IEE  | IIDK | DEL  | FALV  | PF    | MHV  | TDKTY  | TYVR  | ----- | EGNL  | PS   | ---- | AEF  | 57  |    |
| 154 | AEKLS | NNNE  | LEQGV | IIET | IIDR | DDL  | FAVLP | PF    | MKID | SKAY   | LYNR  | ----- | EATL  | SE   | ---- | ATF  | 57  |    |
| 155 | AEKLS | NNNE  | LEQGV | IIET | IIDR | DDL  | FAIL  | PF    | MKIN | SKAY   | LYNR  | ----- | EATL  | SE   | ---- | ATF  | 57  |    |
| 156 | AEKLS | NNNE  | LEQGV | IIET | IIDR | DDL  | FAVLP | PF    | MKID | SKAY   | LYNR  | ----- | EATL  | SE   | ---- | ATF  | 57  |    |
| 157 | AEKLS | NNNE  | LEQGV | IIET | IIDR | DDL  | FAVLP | PF    | MKID | SKAY   | LYNR  | ----- | EATL  | SE   | ---- | ATF  | 57  |    |
| 158 | AEKLS | NNNE  | LEQGV | IIET | IIDR | DDL  | FAIL  | PF    | MKIN | SKAY   | LYNR  | ----- | EATL  | SE   | ---- | ATF  | 57  |    |
| 159 | AEKLS | NNNE  | LEQGV | IIET | IIDR | DDL  | FAIL  | PF    | MKIN | SKAY   | LYNR  | ----- | EATL  | SE   | ---- | ATF  | 57  |    |
| 160 | AEKLS | NNNE  | LEQGV | IIET | IIDR | DDL  | FAIL  | PF    | MKIN | SKAY   | LYNR  | ----- | EATL  | SE   | ---- | ATF  | 57  |    |

|     |                                            |       |        |      |     |    |
|-----|--------------------------------------------|-------|--------|------|-----|----|
| 161 | AAKLSNNQLVSGVVEEIIIDKDEMFAFLPFGVGKVKAYVYNR | ----- | EKTLAD | ---- | ADF | 57 |
| 162 | AKKLSNNQLEIGVVEEIIIDKEDLFSVLPMGKNGKAYVYNR  | ----- | EKTLSE | ---- | GDF | 57 |
| 163 | AEKLSNNELEQGVIIETIIDRDDLFSILPFMKINSKAYLYNR | ----- | EATLSE | ---- | ATF | 57 |
| 164 | AEKLSNNELEQGVIIETIIDRDDLFAVLPMFKIDSKAYLYNR | ----- | EATLSE | ---- | ATF | 57 |
| 165 | AEKLSNNELEQGVIIETIIDRDDLFAVLPMFKIDSKAYLYNR | ----- | EATLSE | ---- | ATF | 57 |
| 166 | AEKLSNNELEQGVIIETIIDRDDLFAVLPMFKIDSKAYLYNR | ----- | EATLSE | ---- | ATF | 57 |
| 167 | AEKLSNNELEQGVIIETIIDRDDLFAVLPMFKIDSKAYLYNR | ----- | EATLSE | ---- | ATF | 57 |
| 168 | AEKLSNNELEQGVIIETIIDRDDLFAVLPMFKIDSKAYLYNR | ----- | EATLSE | ---- | ATF | 57 |
| 169 | AEKLSNNELEQGVIIETIIDRDDLFAVLPMFKIDSKAYLYNR | ----- | EATLSE | ---- | ATF | 57 |
| 170 | AEKLSNNELEQGVIIETIIDRDDLFAILPFMKINSKAYLYNR | ----- | EKTLSE | ---- | ATF | 57 |
| 171 | AEKLSNNELEQGVIIETIIDRDDLFAVLPMFKIDSKAYLYNR | ----- | EATLSE | ---- | ATF | 57 |
| 172 | AEKLSNNELEQGVIIETIIDRDDLFAILPFMKINSKAYLYNR | ----- | EATLSE | ---- | ATF | 57 |
| 173 | AEKLSNNELEQGVIIETIIDRDDLFAILPFMKINSKAYLYNR | ----- | EKTLSE | ---- | ATF | 57 |
| 174 | AEKLSNNELEQGVIIETIIDRDDLFAILPFMKINSKAYLYNR | ----- | EKTLSE | ---- | ATF | 57 |
| 175 | AEKLSNNELEQGVIIETIIDRDDLFAILPFMKINSKAYLYNR | ----- | EKTLSE | ---- | ATF | 57 |
| 176 | AEKLSNNELEQGVIIETIIDRDDLFAVLPMFKIDSKAYLYNR | ----- | EATLSE | ---- | ATF | 57 |
| 177 | AEKLSNNELEQGVIIETIIDRDDLFAILPFMKINSKAYLYNR | ----- | EATLSE | ---- | ATF | 57 |
| 178 | AEKLSNNELEQGVIIETIIDRDDLFAILPFMKINSKAYLYNR | ----- | EATLSE | ---- | ATF | 57 |
| 179 | AEKLSNNELEQGVIIETIIDRDDLFAILPFMKINSKAYLYNR | ----- | EKTLSE | ---- | ATF | 57 |
| 180 | AEKLSNNELEQGVIIETIIDRDDLFAVLPMFKIDSKAYLYNR | ----- | EATLSE | ---- | ATF | 57 |
| 181 | AEKLSNNELEQGVIIETIIDRDDLFAILPFMKINSKAYLYNR | ----- | EKTLSE | ---- | ATF | 57 |
| 182 | AEKLSNNELEQGVIIETIIDRDDLFAILPFMKINSKAYLYNR | ----- | EKTLSE | ---- | ATF | 57 |
| 183 | AEKLSNNELEQGVIIETIIDRDDLFAILPFMKINSKAYLYNR | ----- | EKTLSE | ---- | ATF | 57 |
| 184 | AEKLSNNELEQGVIIETIIDRDDLFAILPFMKINSKAYLYNR | ----- | EKTLSE | ---- | ATF | 57 |
| 185 | AEKLSNNELEQGVIIETIIDRDDLFAILPFMKINSKAYLYNR | ----- | EATLSE | ---- | ATF | 57 |
| 186 | AEKLSNNELEQGVIIETIIDRDDLFAILPFMKINSKAYLYNR | ----- | EKTLSE | ---- | ATF | 57 |
| 187 | AEKLSNNELEQGVIIETIIDRDDLFAILPFMKINSKAYLYNR | ----- | EKTLSE | ---- | ATF | 57 |
| 188 | AEKLSNNELEQGVIIETIIDRDDLFAILPFMKINSKAYLYNR | ----- | EKTLSE | ---- | ATF | 57 |
| 189 | AEKLSNNELEQGVIIETIIDRDDLFAILPFMKINSKAYLYNR | ----- | EKTLSE | ---- | ATF | 57 |
| 190 | AAKLTQDLLLRGVIEAIVKESAVFDYLPFMAITGSALKYNR  | ----- | EATLGD | ---- | AEF | 57 |
| 191 | AEKLSNNELEQGVIIETIIDRDDLFAILPFMKIDSKAYLYNR | ----- | EATLSE | ---- | ATF | 57 |
| 192 | AEKLSIEDLVRGVIEEIIHKDELFAALLPWVTEGKSYDYVR  | ----- | ELTISE | ---- | GEF | 57 |
| 193 | AEKLSNNELEQGVIIETIIDRDDLFAIMPFMKINSKAYLYNR | ----- | EKTLSE | ---- | ATF | 57 |
| 194 | AEKLSNNELEQGVIIETIIDRDDLFAILPFMKINSKAYLYNR | ----- | EKTLSE | ---- | ATF | 57 |
| 195 | AEKLSNNELEQGVIIETIIDRDDLFAILPFMKINSKAYLYNR | ----- | EKTLSE | ---- | ATF | 57 |
| 196 | AEKLSNNELEQGVIIETIIDRDDLFAILPFMKINSKAYLYNR | ----- | EKTLSE | ---- | ATF | 57 |
| 197 | AEKLSNNELEQGVIIETIIDRDDLFAILPFMKINSKAYLYNR | ----- | EKTLSE | ---- | ATF | 57 |
| 198 | AEKLSNNELEQGVIIETIIDRDDLFAILPFMKINSKAYLYNR | ----- | EKTLSE | ---- | ATF | 57 |
| 199 | AEKLSNNELEQGVIIETIIDRDDLFAILPFMKINSKAYLYNR | ----- | EKTLSE | ---- | ATF | 57 |
| 200 | AEKLSNNELEQGVIIETIIDRDDLFAILPFMKINSKAYLYNR | ----- | EKTLSE | ---- | ATF | 57 |
| 201 | AEKLSNNELEQGVIIETIIDRDDLFAILPFMKINSKAYLYNR | ----- | EKTLSE | ---- | ATF | 57 |
| 202 | AAKLSQEDMERGIIEEIIIDRDELFALMPFLHVNDKVYTYNR | ----- | EKELSS | ---- | ATF | 57 |
| 203 | AEKLSNNELEQGVIIETIIDRDDLFAILPFMKINSKAYLYNR | ----- | EKTLSE | ---- | ATF | 57 |
| 204 | AEKLSNNQLISGVIDQIITRDDLFAVLPMFGVNGKAYVYNR  | ----- | ENTLPS | ---- | ADF | 57 |
| 205 | AEKLSNNELEQGVIIETIIDRDDLFAILPFMKITSKAYLYNR | ----- | EKTLSE | ---- | ATF | 57 |
| 206 | AEKLSNNELEQGVIIETIIDRDDLFAILPFMKINSKAYLYNR | ----- | EKTLSE | ---- | ATF | 57 |
| 207 | AEKLSNNELEQGVIIETIIDRDDLFAILPFMKINSKAYLYNR | ----- | EKTLSE | ---- | ATF | 57 |
| 208 | AEKLSNNELEQGVIIETIIDRDDLFAILPFMKINSKAYLYNR | ----- | EKTLSE | ---- | ATF | 57 |
| 209 | AEKLSNNELEQGVIIETIIDRDDLFAILPFMKINSKAYLYNR | ----- | EKTLSE | ---- | ATF | 57 |
| 210 | AEKLSNNELEQGVIIETIIDRDDLFAILPFMKINSKAYLYNR | ----- | EKTLSE | ---- | ATF | 57 |
| 211 | AEKLSNNELEQGVIIETIIDRDDLFAILPFMKITSKAYLYNR | ----- | EKTLSE | ---- | ATF | 57 |
| 212 | AEKLSNNELEQGVIIETIIDRDDLFAILPFMKINSKAYLYNR | ----- | EKTLSE | ---- | ATF | 57 |
| 213 | AEKLSNNELEQGVIIETIIDRDDLFAILPFMKINSKAYLYNR | ----- | EKTLSE | ---- | ATF | 57 |
| 214 | AEKLSNNELEQGVIIETIIDRDDLFAILPFIKINSKAYLYNR | ----- | EATLSE | ---- | ATF | 57 |
| 215 | AEKLSNNELEQGVIIETIIDRDDLFAILPFMKINSKAYLYNR | ----- | EKTLSE | ---- | ATF | 57 |
| 216 | AEKLSNNELEQGVIIETIIDRDDLFAILPFMKINSKAYLYNR | ----- | EKTLSE | ---- | ATF | 57 |
| 217 | AEKLSNNELEQGVIIETIIDRDDLFAILPFMKINSKAYLYNR | ----- | EKTLSE | ---- | ATF | 57 |
| 218 | AEKLSNNELEQGVIIETIIDRDDLFAILPFMKINSKAYLYNR | ----- | EKTLSE | ---- | ATF | 57 |
| 219 | AEKLSNNELEQGVIIETIIDRDDLFAILPFMKINSKAYLYNR | ----- | EKTLSE | ---- | ATF | 57 |
| 220 | AEKLSNNELEQGVIIETIIDRDDLFAILPFMKINSKAYLYNR | ----- | EKTLSE | ---- | ATF | 57 |
| 221 | AEKLSNNELEQGVIIETIIDRDDLFAILPFMKINSKAYLYNR | ----- | EKTLSE | ---- | ATF | 57 |
| 222 | AEKLSNNELEQGVIIETIIDRDDLFAILPFMKINSKAYLYNR | ----- | EKTLSE | ---- | ATF | 57 |
| 223 | AEKLSNNELEQGVIIETIIDRDDLFAILPFMKITSKAYLYNR | ----- | EKTLSE | ---- | ATF | 57 |
| 224 | AEKLSNNELEQGVIIETIIDRDDLFAILPFMKINSKAYLYNR | ----- | EKTLSE | ---- | ATF | 57 |
| 225 | AEKLSNNELEQGVIIETIIDRDDLFAILPFMKINSKAYLYNR | ----- | EKTLSE | ---- | ATF | 57 |
| 226 | AEKLSNNELEQGVIIETIIDRDDLFAILPFMKINSKAYLYNR | ----- | EKTLSE | ---- | ATF | 57 |
| 227 | AEKLSNNELEQGVIIETIIDRDDLFAILPFMKINSKAYLYNR | ----- | EKTLSE | ---- | ATF | 57 |







|     |                                            |       |        |      |     |    |
|-----|--------------------------------------------|-------|--------|------|-----|----|
| 362 | AEKLSNNELEQGVIETIIDRDDLFVLPFMKINSKAYLYNR   | ----- | EKTLSE | ---- | ATF | 57 |
| 363 | AEKLSNNELEQGVIETIIDRDDLFVLPFMKINSKAYLYNR   | ----- | EATLSE | ---- | ATF | 57 |
| 364 | AEKLSNNELEQGVIETIIDRDDLFVLPFMKINSKAYLYNR   | ----- | EATLSE | ---- | ATF | 57 |
| 365 | AEKLSNNELEQGVIETIIDRDDLFVLPFMKINSKAYLYNR   | ----- | EATLSE | ---- | ATF | 57 |
| 366 | AEKLSNNELEQGVIETIIDRDDLFVLPFMKINSKAYLYNR   | ----- | EATLSE | ---- | ATF | 57 |
| 367 | AEKLSNNELEQGVIETIIDRDDLFVLPFMKIDSKAYLYNR   | ----- | EATLSE | ---- | ATF | 57 |
| 368 | AEKLSNNELEQGVIETIIDRDDLFVLPFMKIDSKAYLYNR   | ----- | EATLSE | ---- | ATF | 57 |
| 369 | AEKLSNNELEQGVIETIIDRDDLFVLPFMKINSKAYLYNR   | ----- | EATLSE | ---- | ATF | 57 |
| 370 | AEKLSNNELEQGVIETIIDRDDLFVLPFMKINSKAYLYNR   | ----- | EATLSE | ---- | ATF | 57 |
| 371 | AEKLSNNELEQGVIETIIDRDDLFVLPFMKINSKAYLYNR   | ----- | EATLSE | ---- | ATF | 57 |
| 372 | AEKLSNNELEQGVIETIIDRDDLFVLPFMKINSKAYLYNR   | ----- | EATLSE | ---- | ATF | 57 |
| 373 | AEKLSNNELEQGVIETIIDRDDLFVLPFMKINSKAYLYNR   | ----- | EATLSE | ---- | ATF | 57 |
| 374 | AEKLSNNELEQGVIETIIDRDDLFVLPFMKITSKAYLYNR   | ----- | EATLSE | ---- | ATF | 57 |
| 375 | AEKLSNNELEQGVIETIIDRDDLFVLPFMKINSKAYLYNR   | ----- | EATLSE | ---- | ATF | 57 |
| 376 | AEKLSNNELEQGVIETIIDRDDLFVLPFMKINSKAYLYNR   | ----- | EKTLSE | ---- | ATF | 57 |
| 377 | AKLTDMDMLLRGVIETI VMESPVLQRLPFMEVVGGLTYNR  | ----- | EATLPA | ---- | ASF | 57 |
| 378 | AEKLSNNELEQGVIETIIDRDDLFVLPFMKINSKAYLYNR   | ----- | EATLSE | ---- | ATF | 57 |
| 379 | AEKLSNNELEQGVIETIIDRDDLFVLPFMKINSKAYLYNR   | ----- | EATLSE | ---- | ATF | 57 |
| 380 | AEKLSNNELEQGVIETIIDRDDLFVLPFMKIDSKAYLYNR   | ----- | EATLSE | ---- | ATF | 57 |
| 381 | AEKLSNNELEQGVIETIIDRDDLFVLPFMKIDSKAYLYNR   | ----- | EATLSE | ---- | ATF | 57 |
| 382 | SAKLAQDTLITGLIESIITVNHMFQLLPFEGINGNALAYNR  | ----- | ENALGD | ---- | VES | 58 |
| 383 | AEKLSNNELEQGVIETIIDRDDLFVLPFMKIDAKAYLYNR   | ----- | EATLSE | ---- | ATF | 57 |
| 384 | AEKLSNNELEQGVIETIIDRDDLFVLPFMKIDAKAYLYNR   | ----- | EATLSE | ---- | ATF | 57 |
| 385 | AEKLSNNELEQGVIETIIDRDDLFVLPFMKINSKAHLYNR   | ----- | EATLSE | ---- | ATF | 57 |
| 386 | AEKLSNNELEQGVIETIIDRDDLFVLPFMKINSKAYLYNR   | ----- | EKTLSE | ---- | ATF | 57 |
| 387 | ADRLSATSVERGVEEVIDRDALFALLPFHRIEGKAWVYNR   | ----- | EGVLSE | ---- | GAF | 57 |
| 388 | AEKLSNNELEQGVIETIIDRDDLFVLPFMKIDSKAYLYNR   | ----- | EATLSE | ---- | ATF | 57 |
| 389 | AEKLSNNELEQGVIETIIDRDDLFVLPFMKINSKAYLYNR   | ----- | EKTLSE | ---- | ATF | 57 |
| 390 | AKLCQDELVSGLIENIITVNPFFYQVFPFDSIEGNGLTYNR  | ----- | EDVLGD | ---- | VQV | 58 |
| 391 | AEKLSNNELEQGVIETIIDRDDLFVLPFMKIDSKAYLYNR   | ----- | EATLSE | ---- | ATF | 57 |
| 392 | AEKLSNNELEQGVIETIIDRDDLFVLPFMKINSKAYLYNR   | ----- | EATLSE | ---- | ATF | 57 |
| 393 | AEKLSNNELEQGVIETIIDRDDLFVLPFMKINSKAYLYNR   | ----- | EATLSE | ---- | ATF | 57 |
| 394 | AEKLSNNELEQGVIETIIDRDDLFVLPFMKIDSKAYLYNR   | ----- | EATLSE | ---- | ATF | 57 |
| 395 | AEKLSNNELEQGVIETIIDRDDLFVLPFMKIDSKAYLYNR   | ----- | EATLSE | ---- | ATF | 57 |
| 396 | AEKLSNNELEQGVIETIIDRDDLFVLPFMKVNNKAYLYNR   | ----- | EATLSE | ---- | ATF | 57 |
| 397 | SAKLAQDELVAGVIEENVITVNELYELLPFDGIDGNALAYNR | ----- | ENALGD | ---- | VQM | 58 |
| 398 | AEKLSNNELEQGVIETIIDRDDLFVLPFMKINSKAYLYNR   | ----- | EKTLSE | ---- | ATF | 57 |
| 399 | AEKLSNNELEQGVIETIIDRDDLFVLPFMKINSKAYLYNR   | ----- | EATLSE | ---- | ATF | 57 |
| 400 | AEKLSNNELEQGVIETIIDRDDLFVLPFMKIDSKAYLYNR   | ----- | EATLSE | ---- | ATF | 57 |
| 401 | AEKLSNNELEQGVIETIIDRDDLFVLPFMKIDSKAYLYNR   | ----- | EATLSE | ---- | ATF | 57 |
| 402 | AEKLSNNELEQGVIETIIDRDDLFVLPFMKIDSKAYLYNR   | ----- | EATLSE | ---- | ATF | 57 |
| 403 | AEKLSNNELEQGVIETIIDRDDLFVLPFMKINSKAYLYNR   | ----- | EKTLSE | ---- | ATF | 57 |
| 404 | AEKLSNNELEQGVIETIIDRDDLFVLPFMKINSKAYLYNR   | ----- | EKTLSE | ---- | ATF | 57 |
| 405 | AEKLSNNELEQGVIETIIDRDDLFVLPFMKINSKAYLYNR   | ----- | EKTLSE | ---- | ATF | 57 |
| 406 | AEKLSNNELEQGVIETIIDRDDLFVLPFMKIDSKAYLYNR   | ----- | EATLSE | ---- | ATF | 57 |
| 407 | AEKLSNNELEQGVIETIIDRDDLFVLPFMKINSKAYLYNR   | ----- | EKTLSE | ---- | ATF | 57 |
| 408 | AEKLSNNELEQGVIETIIDRDDLFVLPFMKINSKAYLYNR   | ----- | EATLSE | ---- | ATF | 57 |
| 409 | AEKLSNNELEQGVIETIIDRDDLFVLPFMKIDSKAYLYNR   | ----- | EATLSE | ---- | ATF | 57 |
| 410 | AEKLSNNELEQGVIETIIDRDDLFVLPFMKIDSKAYLYNR   | ----- | EATLSE | ---- | ATF | 57 |
| 411 | AEKLSNNELEQGVIETIIDRDDLFVLPFMKIDSKAYLYNR   | ----- | EATLSE | ---- | ATF | 57 |
| 412 | AEKLSNNELEQGVIETIIDRDDLFVLPFMKIDAKAYLYNR   | ----- | EATLSE | ---- | ATF | 57 |
| 413 | AEKLSNNELEQGVIETIIDRDDLFVLPFMKINSKAYLYNR   | ----- | EKTLSE | ---- | ATF | 57 |
| 414 | AEKLSNNELEQGVIETIIDRDDLFVLPFMKIDSKAYLYNR   | ----- | EATLSE | ---- | ATF | 57 |
| 415 | AEKLSNNELEQGVIETIIDRDDLFVLPFMKIDSKAYLYNR   | ----- | EATLSE | ---- | ATF | 57 |
| 416 | AEKLSNNELEQGVIETIIDRDDLFVLPFMKIDAKAYLYNR   | ----- | EATLSE | ---- | ATF | 57 |
| 417 | AEKLSNNELEQGVIETIIDRDDLFVLPFMKVNNKAYLYNR   | ----- | EATLSE | ---- | ATF | 57 |
| 418 | AEKLSNNELEQGVIETIIDRDDLFVLPFMKINSKAYLYNR   | ----- | EATLSE | ---- | ATF | 57 |
| 419 | AKLSIEDKQRGVIEEIIDRDELFALVPFVRAKDKVYSYVR   | ----- | EGELPT | ---- | GDW | 57 |
| 420 | AEKLSNNELEQGVIETIIDRDDLFVLPFMKIDSKAYLYNR   | ----- | EATLSE | ---- | ATF | 57 |
| 421 | AEKLSNNELEQGVIETIIDRDDLFVLPFMKITSKAYLYNR   | ----- | EKTLSE | ---- | ATF | 57 |
| 422 | AEKLSNNELEQGVIETIIDRDDLFVLPFMKINSKAYLYNR   | ----- | EATLSE | ---- | ATF | 57 |
| 423 | AEKLSNNELEQGVIETIIDRDDLFVLPFMKVNNKAYLYNR   | ----- | EATLSE | ---- | ATF | 57 |
| 424 | AEKLSNNELEQGVIETIIDRDDLFVLPFMKIDSKAYLYNR   | ----- | EATLSE | ---- | ATF | 57 |
| 425 | AEKLSNNELEQGVIETIIDRDDLFVLPFMKINSKAYLYNR   | ----- | EATLSE | ---- | ATF | 57 |
| 426 | AEKLSNNELEQGVIETIIDRDDLFVLPFMKINSKAYLYNR   | ----- | EATLSE | ---- | ATF | 57 |
| 427 | AEKLSNNELEQGVIETIIDRDDLFVLPFMKINSKAYLYNR   | ----- | EATLSE | ---- | ATF | 57 |
| 428 | AEKLSNNELEQGVIETIIDRDDLFVLPFMKIDSKAYLYNR   | ----- | EATLSE | ---- | ATF | 57 |

|     |                                                |       |        |       |       |       |
|-----|------------------------------------------------|-------|--------|-------|-------|-------|
| 429 | AEKLSNNELEQGVIETIIDRDDLFAILPFMKITSKAYLYNR      | ----- | EKTLSE | ----  | ATF   | 57    |
| 430 | AEKLSNNELEQGVIETIIDRDDLFAILPFMKINSKAYLYNR      | ----- | EATLSE | ----  | ATF   | 57    |
| 431 | AEKLSNNELEQGVIETIIDRDDLFAILPFMKIDSKAYLYNR      | ----- | EATLSE | ----  | ATF   | 57    |
| 432 | SAKLAQDELVAGVIENVI TVNKM YQLLPFDGIDGNSLAYNR    | ----- | ENVLGD | ----  | VQV   | 58    |
| 433 | AEKLSNNELEQGVIETIIDRDDLFAILPFMKINSKAYLYNR      | ----- | EKTLSE | ----  | ATF   | 57    |
| 434 | AEKLSNNELEQGVIETIIDRDDLFAVL PFMKINSKAYLYNC     | ----- | EKTLSE | ----  | ATF   | 57    |
| 435 | AEKLSNNELEQGVIETIIDRDDLFAVL PFMKINSKAYLYNC     | ----- | EKTLSE | ----  | ATF   | 57    |
| 436 | AEKLSNNELEQGVIETIIDRDDLFAILPFMKIDSKAYLYNR      | ----- | EATLSE | ----  | ATF   | 57    |
| 437 | AERLSNNELEQGVIETIIDRDDLFAIMPFFKINSKAYLYNR      | ----- | EKTLSE | ----  | AEF   | 57    |
| 438 | AEKLSNNELEQGVIETI VDRDDLFAILPFMKIDSKAYLYNR     | ----- | EATLSE | ----  | ATF   | 57    |
| 439 | AERLSNNTLISGIITEIIDRDDLFSILPFFVKVNSKAYVYNR     | ----- | ENTLAG | ----  | ADW   | 57    |
| 440 | AEKLSNNELEQGVIETIIDRDDLFAILPFMKINSKAYLYNR      | ----- | EKTLSE | ----  | ATF   | 57    |
| 441 | AAKLTDDMLLRGVIETI VMESPVLQRLPFMEVVG TGLTYNR    | ----- | EATLPA | ----  | ATF   | 57    |
| 442 | AEKLSNNTLEQGVIETIIDREDLFAVL PFMKVDSKAYLYNR     | ----- | ESELSE | ----  | ASF   | 57    |
| 443 | AEKLSNNELEQGVIETIIDRDDLFAILPFFKVNSKAYLYNR      | ----- | EATLSE | ----  | AGF   | 57    |
| 444 | AAKLSNNDLVAGI IENI VTVDRFFGVL PFEVGPAAVYNR     | ----- | ENVLGD | ----  | VQM   | 58    |
| 445 | SAKLCQDVL IQGVIESI VTVDDFYWMLPFE GIDGNALSYNR   | ----- | ENALGD | ----  | VES   | 58    |
| 446 | AEKLSNNELEQGVIETIIDRDDLFAILPFMKINSKAYLYNR      | ----- | EKTLSE | ----  | ATF   | 57    |
| 447 | AEKLSNNELEQGVIETIIDRDDLFAILPFMKINSKAYLYNR      | ----- | EKTLSE | ----  | ATF   | 57    |
| 448 | AAKLTNDLLLRGVIETI VKESSVLLMLPFMEV TGTALTYNR    | ----- | EATMPQ | ----  | AQF   | 55    |
| 449 | AEKLSNNELEQGVIETIIDRDDLFAILPFMKINSKAYLYNR      | ----- | EKTLSE | ----  | ATF   | 57    |
| 450 | AEKLSNNELEQGVIETIIDRDDLFAILPFMKINSKAYLYNR      | ----- | EKTLSE | ----  | ATF   | 57    |
| 451 | AAKLTDDLLLRGVIETI VMESPVLQRLPFMEVVG TGLTYNR    | ----- | EGTLPA | ----  | TDF   | 57    |
| 452 | AAKLTNDMLLRGVIETI VMESSVLTMLPFM NVTGTALTYNR    | ----- | EKTMPA | ----  | AKF   | 57    |
| 453 | AEKLSNNELEQGVIETIIDRDDLFAILPFMKIDSKAYLYNR      | ----- | EATLSE | ----  | ATF   | 57    |
| 454 | SAKLAQDELVAGVIENVI TVNEL YELL PFDGIDGNALAYNR   | ----- | ENVLGD | ----  | VQM   | 58    |
| 455 | AEKLSNNQLVAGVIEEII ERDEL FALIPF IGINGKAYVYDR   | ----- | ENSLPT | ----  | ADF   | 57    |
| 456 | AEKLSNNELEQGVIETIIDRDDLFAVL PFMKINSKAYLYNR     | ----- | EKTLSE | ----  | ATF   | 57    |
| 457 | AEKLSNNELEQGVIETIIDRDDLFAILPFMKINSKAYLYNR      | ----- | EKTLSE | ----  | ATF   | 57    |
| 458 | AEKLSNNELEQGVIETIIDRDDLFAILPFMKIDSKAYLYNR      | ----- | EATLSE | ----  | ATF   | 57    |
| 459 | AEMLSQN DVVVG IIEEII TVNEL FGLLPF VKTEGKAYVYHR | ----- | ENTLPS | ----  | VSY   | 57    |
| 460 | AEKLSNNELEQGVIETIIDRDDLFAILPFMKINSKAYLYNR      | ----- | EKTLSE | ----  | ATF   | 57    |
| 461 | SAKLAQDELVAGVIENVI TVNEIFEQLPFDGIDGNALAYNR     | ----- | ENVLGD | ----  | VQM   | 58    |
| 462 | AEKLSNNELEQGVIETIIDRDDLFAILPFMKINSKAYLYNR      | ----- | EKTLSE | ----  | ATF   | 57    |
| 463 | -----                                          | ----- | -----  | ----- | ----- | ----- |
| 464 | AEKLSNNELEQGVIETIIDRDDLFAILPFMKINSKAYLYNR      | ----- | EATLSE | ----  | ATF   | 57    |
| 465 | AEKLSNNELEQGVIETIIDRDDLFAILPFMKINSKAYLYNR      | ----- | EKTLSE | ----  | ATF   | 57    |
| 466 | AEKLSNNELEQGVIETIIDRDDLFAILPFMKINSKAYLYNR      | ----- | EKTLSE | ----  | ATF   | 57    |
| 467 | AEKLSNNELEQGVIETIIDRDDLFAILPFMKINSKAYLYNR      | ----- | EKTLSE | ----  | ATF   | 57    |
| 468 | AEKLSNNELEQGVIETIIDRDDLFAILPFMKITSKAYLYNR      | ----- | EKTLSE | ----  | ATF   | 57    |
| 469 | AEKLSNNELEQGVIETIIDHEDLFAVL PFFHKINSKAYLYNR    | ----- | EATLSE | ----  | AQF   | 57    |
| 470 | AEKLSNNELEQGVIETIIDRDDLFAILPFMKINSKAYLYNR      | ----- | EKTLSE | ----  | ATF   | 57    |
| 471 | SAKLALDDL VAGVIENVI TVNRM YEMIPFDGIAGNALAYNR   | ----- | ENVLGD | ----  | VQV   | 58    |
| 472 | AERLSAN QMVQGVIEEII ERDDLFSILPFFVQTEGKAYLYNR   | ----- | EKTIGG | ----  | ADW   | 57    |
| 473 | SAKLALDDL VAGVIENVI TVNRM YEMIPFDGIAGNALAYNR   | ----- | ENVLGD | ----  | VQV   | 58    |
| 474 | AEKLSNNELEQGVIETIIDRDDLFAILPFMKINSKAYLYNR      | ----- | EKTLSE | ----  | ATF   | 57    |
| 475 | AEKLSNNELEQGVIETIIDRDDLFAILPFMKITSKAYLYNR      | ----- | EATLSE | ----  | ATF   | 57    |
| 476 | SAKLAQDELVAGVIENVI TVNEIFEQLPFDGIDGNALAYNR     | ----- | ENVLGD | ----  | VQM   | 58    |
| 477 | SAKLSQN LLYAGI IESI VEVNPF FEILPFFEIEGNALSYNR  | ----- | EKTLGD | ----  | IQF   | 58    |
| 478 | AAKLSQDDL VSGI IANI VTVDRFYGLLPFEVGPAAVYNR     | ----- | ENVLGD | ----  | VQM   | 58    |
| 479 | SAKLAQDELVAGVIENVI TVNEMFDLLPFDGIDGNALAYNR     | ----- | ENVLGD | ----  | VQV   | 58    |
| 480 | SAKLALDELVAGVIENVI TVNRM FEVIPFDGISGNALAYNR    | ----- | ENVLGN | ----  | VQV   | 58    |
| 481 | AEKLSNNELEQGVIETIIDRDDLFAILPFMKINSKAYLYNR      | ----- | EKTLSE | ----  | ATF   | 57    |
| 482 | AEKLSNNELEQGVIETIIDRDDLFAILPFMKINSKAYLYNR      | ----- | EKTLSE | ----  | ATF   | 57    |
| 483 | AEKLSNNTLEQGVIETIIDREDLFAVL PFMKVDSKAYLYNR     | ----- | ESELSE | ----  | AEF   | 57    |
| 484 | AEKLSNNELEQGVIETIIDRDDLFAILPFMKINSKAYLYNR      | ----- | EKTLSE | ----  | ATF   | 57    |
| 485 | AAKLTNDMLLRGVIETI VMESSVLTLLPFM NVTGTALTYNR    | ----- | EKTMPA | ----  | AQF   | 57    |
| 486 | AEKLSNNTLEQGVIETIIDREDLFAVL PFMKVDSKAYLYNR     | ----- | ESELSE | ----  | AAF   | 57    |
| 487 | AEKLSNNELEQGVIETIIDRDDLFAILPFMKIDSKAYLYNR      | ----- | EATLSE | ----  | ATF   | 57    |
| 488 | AEKLSNNTLEQGVIETIIDREDLFAVL PFMKVDSKAYLYNR     | ----- | ESELSE | ----  | AQF   | 57    |
| 489 | AEKLSNNTLEQGVIETIIDREDLFAVL PFMKVDSKAYLYNR     | ----- | ESELSE | ----  | ATF   | 57    |
| 490 | SAKLAQDELVAGVIENVI TVNEIFEQLPFDGIDGNALAYNR     | ----- | ENVLGD | ----  | VQM   | 58    |
| 491 | AEKLSNNELEQGVIETIIDRDDLFAILPFMKINSKAYLYNR      | ----- | EKTLSE | ----  | ATF   | 57    |
| 492 | AAKLSNNDLVAGI VENI VTVDRFFGVL PFEVGPAAVYNR     | ----- | ENVLGD | ----  | VQM   | 58    |
| 493 | AEKLSNNELEQGVIETIIDRDDLFAILPFMKINSKAYLYNR      | ----- | EKTLSE | ----  | ATF   | 57    |
| 494 | AAKLTNDLLLRGVETI VRESSVLALLPFT EVTGTALTYVR     | ----- | EATLPA | ----  | ASW   | 57    |
| 495 | AEKLSNNELEQGVIETIIDRDDLFAVL PFMKINSKAYLYNR     | ----- | EKTLSE | ----  | ATF   | 57    |

|     |               |                |                   |            |        |      |     |    |
|-----|---------------|----------------|-------------------|------------|--------|------|-----|----|
| 496 | AEKLSNNELEQGV | ETIIDRDDLF     | AVLPFMKINSKAYLYNR | -----      | EKTLSE | ---- | ATF | 57 |
| 497 | SAKLSQDLLLSGV | IESIVDVNPIYEV  | FPFMGIEGNSLAYNR   | -----      | ENVLGD | ---- | VQF | 58 |
| 498 | AEKLSNNELEQGV | ETIIDRDDLF     | AILPFMKINSKAYLYNR | -----      | EKTLSE | ---- | ATF | 57 |
| 499 | AEKLSNNTLEQGV | ETIIDREDLF     | AVLPFMKVDSKAYLYNR | -----      | ESELSE | ---- | AQF | 57 |
| 500 | SAKLAQDEL     | VAGVIENVITVNEI | FEQLPFDGIDGNA     | LAYNR----- | ENVLGD | ---- | VQM | 58 |

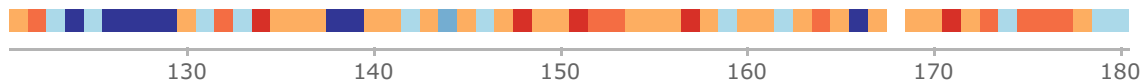

|    |   |   |   |   |   |   |   |   |   |   |   |   |   |   |   |   |   |   |   |   |   |   |   |   |   |   |   |   |   |   |   |   |   |   |   |   |   |   |   |   |   |   |   |   |   |   |   |   |   |   |   |   |   |   |   |   |   |   |   |     |
|----|---|---|---|---|---|---|---|---|---|---|---|---|---|---|---|---|---|---|---|---|---|---|---|---|---|---|---|---|---|---|---|---|---|---|---|---|---|---|---|---|---|---|---|---|---|---|---|---|---|---|---|---|---|---|---|---|---|---|---|-----|
| 1  | I | G | F | G | - | - | - | - | D | P | I | P | D | N | T | T | I | P | D | E | P | I | - | T | F | P | M | S | E | L | A | T | S | F | L | V | A | Y | K | G | Q | D | I | Y | - | S | - | Y | T | N | D | L | V | K | L | E | E | H | L | 108 |
| 2  | I | G | F | G | - | - | - | - | D | P | I | P | D | N | T | T | I | P | D | E | P | I | - | T | F | P | M | S | E | L | A | T | S | F | L | V | A | Y | K | G | Q | D | I | Y | - | S | - | Y | T | N | D | L | V | K | L | E | E | H | L | 108 |
| 3  | I | G | F | G | - | - | - | - | D | P | I | P | D | N | T | T | I | P | D | E | P | I | - | T | F | P | M | S | E | L | A | T | S | F | L | V | A | Y | K | G | Q | D | I | Y | - | S | - | Y | T | N | D | L | V | K | L | E | E | H | L | 108 |
| 4  | I | G | F | G | - | - | - | - | D | P | I | P | D | N | T | T | I | P | D | E | P | I | - | T | F | P | M | S | E | L | A | T | S | F | L | V | A | Y | K | G | Q | D | I | Y | - | S | - | Y | T | N | D | L | V | K | L | E | E | H | L | 108 |
| 5  | I | G | F | G | - | - | - | - | D | P | I | P | D | N | T | T | I | P | D | E | P | I | - | T | F | P | M | S | E | L | A | T | S | F | L | V | A | Y | K | G | Q | D | I | Y | - | S | - | Y | T | N | D | L | V | K | L | E | E | H | L | 108 |
| 6  | I | G | F | G | - | - | - | - | D | P | I | P | D | N | T | T | I | P | D | E | P | I | - | T | F | P | M | S | E | L | A | T | S | F | L | V | A | Y | K | G | Q | D | I | Y | - | S | - | Y | T | N | D | L | V | K | L | E | E | H | L | 108 |
| 7  | I | G | F | G | - | - | - | - | D | P | I | P | D | N | T | T | I | P | D | E | P | I | - | T | F | P | V | S | E | L | A | T | S | F | L | V | A | Y | K | G | Q | D | I | Y | - | S | - | Y | T | N | D | L | V | K | L | E | D | H | L | 108 |
| 8  | I | G | F | G | - | - | - | - | D | P | I | P | D | N | T | T | I | P | D | E | P | I | - | T | F | P | M | S | E | L | A | T | S | F | L | V | A | Y | K | G | Q | D | I | Y | - | S | - | Y | T | N | D | L | V | K | L | E | E | H | L | 108 |
| 9  | I | A | F | G | - | - | - | - | D | P | I | P | D | N | T | T | I | P | D | E | P | I | - | T | F | P | V | S | E | L | A | T | S | F | L | V | A | Y | K | G | Q | D | I | Y | - | S | - | Y | T | N | D | L | V | K | L | E | D | H | L | 108 |
| 10 | I | G | F | G | - | - | - | - | D | P | I | P | D | N | T | T | I | P | D | E | P | I | - | T | F | P | M | S | E | L | A | T | S | F | L | V | A | Y | K | G | Q | D | I | Y | - | S | - | Y | T | N | D | L | V | K | L | E | E | H | L | 108 |
| 11 | I | G | F | G | - | - | - | - | D | P | I | P | D | N | T | T | I | P | D | E | P | I | - | T | F | P | M | S | E | L | A | T | S | F | L | V | A | Y | K | G | Q | D | I | Y | - | S | - | Y | T | N | D | L | V | K | L | E | E | H | L | 108 |
| 12 | I | G | F | G | - | - | - | - | D | P | I | S | D | N | T | T | I | P | D | E | P | I | - | T | F | S | M | S | E | L | A | T | S | F | L | V | A | Y | K | G | Q | D | I | Y | - | S | - | Y | T | N | D | L | V | K | L | E | E | H | L | 108 |
| 13 | I | G | F | G | - | - | - | - | V | P | I | P | D | N | T | T | I | P | D | E | P | I | - | T | F | P | M | S | E | L | A | T | S | F | L | V | A | Y | K | V | Q | D | I | Y | - | S | - | Y | T | N | D | L | V | K | L |   |   |   |   |     |

```

57 NT----GC-SNVAETADTL--ASITFPVVDFVVRKQICFTDADRY-H-LPNNPDEDEYLV 107
58 ATILADGAD--ITDQTAGVDET-VTFTCGELASRYKIDYNAQDRW-R-Y-QSIDNALAI 114
59 -DEGG----SAISDTSAVPSSPNVTFFPKLVATSFKNVNDTAEALM-S-SVNDQVETQSV 112
60 VD----PC-QSADDISTSV--TPARFGMVVEYVARVPVCMADQDIF-Q-HPNDITDFNITL 106
61 -DAGG----TAVSDTPAVPTSPNATFSLKLLISAAKNTNYTAQYDM-S-NVNDQEGVQINA 112
62 MT----AC-GTVDLEQLPDL--SQAEMVFVDYATRYTICASDLDRY-R-NPLLLQAILFAV 106
63 AG----AC-LPIKDHSDA--TQVQFGMVVEYATRVVICNADEDTQ-R-GPNTPELNETVL 106
64 -DAGG----TALSDTPAVPNDPNVSFSLKLLATSFKVNYTAEYDM-S-NVNDQVEVQTV 112
65 -DAGG----TAVSDTPAVPTSPNPTFSLKLLISMVKTNQTAQYTM-S-NVNNQEKVALAA 112
66 RN----DC-GEVIEQLPTV--SQAANFLYDFIAHYSICSIDLDRV-Q-YPTQLDAAMFAI 106
67 VP----PC-DAVPDRSSVF--SQATFGMTYLNTRVRVCHANQDTF-R-TPITPEAAEYPL 106
68 LPF----C-APIADQTT--VPVARSYSFGEATSRIVCYGTQDLQ-S-NVNDQSAVQLEM 108
69 LPF----C-GPIADQTT--VPAARSYSFGEVATSRVVCYGTQDLQ-S-NVNDQAAVQIEM 124
70 LGQ----CKDYTDQSFD--SWQERVFDGAPATMYQSCESAIDKYTS-SINDVIDAQYAK 114
71 LGQ----CEDYTDQSFD--SWQERVFSFGAPATMYQSCESAIDKYTS-SINDVIDVQYAK 165
72 LGQ----CEDYTDQSFD--SWQERVFSFGAPATMYQSCESAIDKYTS-SINDVIDVQYAK 160
73 LGQ----CEDYLDQSFD--SWQERVFDGAPATLYQSCESAIDKYTS-SINDVIDVQFAK 114
74 IDV-N---DDVP EGAA--TFEEVVCRRLARLAGDVDVDKFLDETM-S-DINDQKATQIAS 108
75 FT----SC-AGVPEQEATV--SQAEFQFVDFATRYAICASDLDRF-R-NPQLLQTVLYAI 106
76 -----VTDRTSQPTDPEVVFGLANIITRYSVCFDDQDKF-S-NPNNLDRTEYVL 47
77 VA----PC-EPADDISTQV--TPARFGMVQYVARVPVCMADQAIY-R-HPTDIVDGNVAL 106
78 LDP-Y---EDVP EGAA--TFDPVSTRRLRILAGQVLLDKFLIKTQ-S-DVNDQLAEQISA 108
79 ANFNS-EC-GPVTDRTSQPANPEVVFGLANIITRYSVCFDDQDKF-S-NPNNLDHAEYVL 112
80 LDP-N---EVVP EEAS--TFEEVVARLRILIGDVDVDKFLNTTM-D-DTNNQKAIQIAQ 108
81 LDPVN---DTVNEEAS--TFTEVTANLRVLAGDVDVDKFLDATM-G-DHNSQKAIQIAQ 109
82 LDP-N---EAIPESGS--DFDEVTAKLKILAGDVDVDKFLMETM-S-DVNSQLGLQLAA 108
83 LDA-Y---EAVP EGAA--TFDEVTTKLKVLAGDVIDDKFTAAVQ-S-NLNPQVAIQLAA 108
84 LDA-Y---EAVP EGAA--TFDEVTTKLKVLAGDVIDDKFTAAVQ-S-NLNPQIAIQLAA 108
85 LDA-Y---EAVP EGAA--TFDEVTTKLKVLAGDVIDDKFTAAVQ-S-NLNPQIAIQLAA 108
86 LDA-Y---EAVP EGAA--TFDEVTTKLKVLAGDVIDDKFTAAVQ-S-NLNPQIAIQLAA 108
87 LGA----CLDYTLQDYE--I-EQATYVYGE LVSAFQTCSTTQD-ITG-GPNNLNNALRKK 106
88 AQVLGDNTPA-IADKTADADTS-VTFTVGE LATSyllDYTAKDRFSS-Y-QSIDNVESVL 57
89 LDA-Y---EAVP EGAA--TFDEVTTKLKVLAGDVIDDKFTAAVQ-S-NLNPQVAIQLAA 108
90 LDP-Y---EVVP EGAA--TFKEVMTKLRLILAGDVDL DKFLITTQ-S-DTNDQLAIQIAS 108
91 VS----DC-SLVD EQVPTI--SEAEFALQEFITRYKICTFDLDSY-Q-FPNQLETVLYAL 65
92 LGA----CLDYTLQDYE--I-EQATYIYGE LVSAFQTCSTTQD-ITG-GPNNLNNALRKK 106
93 LGA----CLDYTLQDYE--I-EQATYIYGE LVSAFQTCSTTQD-ITG-GPNNLNNALRKK 106
94 LSP-Y---DPVP EGAA--TFDEVSTKLRLILAGDVIDDKFTAETQ-S-DLNDQIAIQLQG 108
95 LDA-Y---EAVP EGAA--TFDEVTAKLKVLAGDVIDDKFTAAVQ-S-HLNPQIAIQLAA 108
96 LDP-N---DVVP EEAS--TFQEVVAKLRILAGDVIDDKFLQATM-S-DTNSQIVTQLAA 108
97 LDP-Y---EDIKEGAA--TFEEVQAKLRILAGHVDLDFLVETQ-S-DTHDQLAIQLAA 108
98 LDV-N---EVVP EGTS--DVEEVVTKLRILAGDVDVDKFLIDETM-S-DKNSQLALQIAM 108
99 LDP-Y---EDIPEGAA--TFDEVQAKLRILAGHVDLDFNFILETQ-S-ETNPQLAIQLAA 108
100 LDV-N---EIVPEGAS--DVEEVVTKLRILAGDVDVDNFLNETM-S-DTNSQLALQIAL 108
101 IDPVT---DTVPEGAA--TFESVTETLKVLIAGDVDVDNFLRETM-S-DTNNQFETQIAA 109
102 AQPL--DYNAAIADSTMAP-SANVTFTPGVVASRYRIAYSALGRF-D-ANQDLDAVEAAL 112
103 LDV-N---EVVP EGTS--DVEEVVTKLRILAGDVDVDKFLIDETM-S-DKNSQLALQIAM 108
104 LDP-N---EEIKESAS--TFEEVTAKLRILAGDVIDDKFLDSTM-D-DTNNQMIAIQVTQ 108
105 LDP-N---EVIIEEGS--TFDEVTAHLRLILAGDVDVDKFLDSTM-G-DTNAQKAIQIKQ 108
106 LDP-N---EVIIEEGS--TFDEVTAHLRLILAGDVDVDKFLDSTM-G-DTNAQKAIQIKQ 106
107 LDP-N---DPITESAA--TFTEVVAKLRILVGDVDVDKFLQATM-G-DTNDQMIAQIAK 108
108 LDP-N---EVIIEEGS--TFDEVTAHLRLILAGDVDVDKFLDSTM-G-DTNAQKAIQIKQ 108
109 LDP-N---EVIIEEGS--TFDEVTAHLRLILAGDVDVDKFLDSTM-G-DTNAQKAIQIKQ 108
110 LDP-N---EVIIEEGS--TFDEVTAHLRLILAGDVDVDKFLDSTM-G-DTNAQKAIQIKQ 108
111 LDP-N---EEVPEESAA--TFTPIVTLLKIAGDVDVDKFLIQATE-S-DTNDQKAVQIAA 108
112 LDP-N---EVIIEEGS--TFDEVTAHLRLILAGDVDVDKFLDSTM-G-DTNAQKAIQIKQ 110
113 LDP-N---EVIIEEGS--TFDEVTAHLRLILAGDVDVDKFLDSTM-G-DTNAQKAIQIKQ 108
114 LDP-N---EVIIEEGS--TFDEVTAHLRLILAGDVDVDKFLDSTM-G-DTNAQKAIQIKQ 108
115 LDV-N---EVVP EGAS--EVEEVVTKLRILAGDVDVDKFLNETM-S-DTNQQLAIQIAM 108
116 LDP-N---DEVPEESAS--KFVEVTTKLRLILAGDVDVDKFLASTM-G-DTNPQKALQIAA 108
117 LDP-N---EEIKESAS--TFEEVTAKLRILAGDVIDDKFLGSTM-D-DTNNQMIAIQVTQ 108
118 LDP-N---EEIKESAS--TFEEVTAKLRILAGDVIDDKFLDSTM-D-DTNNQMIAIQVTQ 108
119 LDP-N---DEVPEESAS--KFVEVTTKLRLILAGDVDVDKFLASTM-G-DTNPQKALQIAA 108
120 LDV-N---EVVP ENAS--TFKEVTTKLRLILIGDVDVDKFLMAETM-S-DTEDQLGVQIAL 108
121 LDP-N---EVIIEEGS--TFDEVTAHLRLILAGDVDVDKFLDSTM-G-DTNAQKAIQIKQ 108
122 LDP-N---EVIIEEGS--TFDEVTAHLRLILAGDVDVDKFLDSTM-G-DTNAQKAIQIKQ 108
123 LDP-N---DEITEGAS--TFTEVVAKLRILAGDVIDDKFLETTM-G-DTNSQMKIQISK 108

```



|     |       |      |          |    |         |           |   |   |   |   |   |   |   |   |   |   |   |   |   |   |   |   |   |   |   |   |   |   |   |   |   |     |     |     |
|-----|-------|------|----------|----|---------|-----------|---|---|---|---|---|---|---|---|---|---|---|---|---|---|---|---|---|---|---|---|---|---|---|---|---|-----|-----|-----|
| 124 | LDP-N | ---- | EVIEEEGS | -- | TFDEVT  | AHLRILAGD | V | V | D | K | F | L | D | S | T | M | - | G | - | D | T | N | A | Q | K | A | I | Q | I | K | Q | 108 |     |     |
| 125 | LDP-N | ---- | EVIEEEGS | -- | TFDEVT  | AHLRILAGD | V | V | D | K | F | L | D | S | T | M | - | G | - | D | T | N | A | Q | K | A | I | Q | I | K | Q | 108 |     |     |
| 126 | LDP-N | ---- | EVIEEEGS | -- | TFDEVT  | AHLRILAGD | V | V | D | K | F | L | D | S | T | M | - | G | - | D | T | N | A | Q | K | A | I | Q | I | K | Q | 108 |     |     |
| 127 | LDP-Y | ---- | EDITEGAA | -- | TFEEVQ  | AKLRILAGH | V | D | L | N | F | L | V | E | T | Q | - | S | - | D | T | Q | D | Q | L | A | V | Q | L | A | A | 108 |     |     |
| 128 | LDP-Y | ---- | EDITEGAA | -- | TFEEVQ  | AKLRILAGH | V | D | L | N | F | L | V | E | T | Q | - | S | - | D | T | Q | D | Q | L | A | V | Q | L | A | A | 108 |     |     |
| 129 | LSP-N | ---- | DTVNEDAG | -- | TFDEVV  | SKLRILAGD | V | V | D | K | F | L | Q | E | T | D | - | S | - | D | T | N | D | Q | R | A | T | Q | I | A | M | 108 |     |     |
| 130 | LSP-N | ---- | DTVNEDAG | -- | TFDEVV  | SKLRILAGD | V | V | D | K | F | L | Q | E | T | D | - | S | - | D | T | N | D | Q | R | A | T | Q | I | A | M | 108 |     |     |
| 131 | LSP-N | ---- | DTVNEDAG | -- | TFDEVV  | SKLRILAGD | V | V | D | K | F | L | Q | E | T | D | - | S | - | D | T | N | D | Q | R | A | T | Q | I | A | M | 108 |     |     |
| 132 | LDP-N | ---- | EVIEEEGS | -- | TFDEVT  | AHLRILAGD | V | V | D | K | F | L | D | S | T | M | - | G | - | D | T | N | A | Q | K | A | I | Q | I | K | Q | 108 |     |     |
| 133 | AGVGD | ---- | TITAKNAT | -- | TFTSVT  | SVLTSILG  | D | A | E | V | N | G | L | V | Q | A | T | Q | - | S | - | G | E | T | N | Q | T | A | Q | Q | I | A   | S   | 110 |
| 134 | LSP-N | ---- | DTVNEDAG | -- | TFDEVV  | SKLRILAGD | V | V | D | K | F | L | Q | E | T | D | - | S | - | D | T | N | D | Q | R | A | T | Q | I | A | M | 108 |     |     |
| 135 | LDP-N | ---- | EVIEEEGS | -- | TFDEVT  | AHLRILAGD | V | V | D | K | F | L | D | S | T | M | - | G | - | D | T | N | A | Q | K | A | I | Q | I | K | Q | 108 |     |     |
| 136 | LDP-N | ---- | DEIHESAS | -- | KFTEVT  | TNLRILAGD | V | V | D | K | F | L | M | A | T | M | - | G | - | D | T | N | D | Q | L | A | L | Q | L | A | Q | 108 |     |     |
| 137 | LDP-Y | ---- | DTVPEGGA | -- | EFDEVV  | AKLRILIGD | V | D | I | N | F | L | D | E | T | M | - | S | - | D | T | N | D | Q | T | A | T | Q | I | A | A | 108 |     |     |
| 138 | LDP-N | ---- | DPVNESAA | -- | TFTEVV  | AKLRILAGD | V | V | D | K | F | L | Q | S | T | M | - | G | - | D | T | N | D | Q | M | A | I | Q | I | A | K | 108 |     |     |
| 139 | LDP-Y | ---- | DPVPEGAA | -- | TFTEVT  | TRLRILAGD | V | M | D | K | F | L | L | S | T | Q | - | S | - | D | K | N | P | Q | L | A | I | Q | I | A | A | 108 |     |     |
| 140 | LDP-N | ---- | DAVPEGAA | -- | KFSEHV  | AKLRITAGD | V | V | D | K | F | L | I | Q | T | T | M | - | S | - | D | T | S | D | Q | L | A | T | Q | V | R | L   | 108 |     |
| 141 | LDP-N | ---- | EEVPEGAA | -- | KFTEVT  | TALRVLAH  | D | V | D | I | D | K | F | L | A | S | S | E | - | S | - | D | V | N | D | Q | V | A | L | Q | I | A   | A   | 108 |
| 142 | VDP-Y | ---- | EVLEESAS | -- | TFTSHS  | TKIRRFAG  | Q | V | D | I | N | F | M | D | E | V | Q | - | S | - | N | L | N | P | Q | T | A | I | Q | L | A | S   | 108 |     |
| 143 | LDP-N | ---- | DAVPEGAA | -- | KFSEHV  | AKLRITAGD | V | V | D | K | F | L | I | Q | T | T | M | - | S | - | D | T | S | D | Q | L | A | T | Q | V | R | L   | 108 |     |
| 144 | MDP-Y | ---- | DDFEESAA | -- | TFTEVST | KLKILGGD  | I | L | L | D | K | F | T | T | A | T | Q | - | S | - | A | L | N | D | Q | V | G | I | Q | L | Q | K   | 108 |     |
| 145 | LDP-Y | ---- | DVVPEGAA | -- | TFEEVV  | TRLRILAGD | V | D | L | D | K | F | L | M | S | T | M | - | S | - | D | A | N | P | Q | L | A | I | Q | L | A | A   | 108 |     |
| 146 | LDP-Y | ---- | DVVPEGGA | -- | DFDEVV  | AKLRILIGD | V | D | I | N | F | L | D | E | T | M | - | S | - | D | T | N | D | Q | T | A | I | Q | I | A | A | 108 |     |     |
| 147 | IDV-N | ---- | DTITEGAA | -- | TFTEHV  | AKLRILAGD | V | V | D | K | F | L | A | T | T | M | - | S | - | D | T | N | N | Q | L | A | I | Q | V | R | Q | 108 |     |     |
| 148 | IDV-N | ---- | DTITEGAA | -- | TFTEHV  | AKLRILAGD | V | V | D | K | F | L | A | T | T | M | - | S | - | D | T | N | N | Q | L | A | I | Q | V | R | Q | 108 |     |     |
| 149 | IDV-N | ---- | DTITEGAA | -- | TFTEHV  | AKLRILAGD | V | V | D | K | F | L | A | T | T | M | - | S | - | D | T | N | N | Q | L | A | I | Q | V | R | Q | 108 |     |     |
| 150 | IDV-N | ---- | DTITEGAA | -- | TFTEHV  | AKLRILAGD | V | V | D | K | F | L | A | T | T | M | - | S | - | D | T | N | N | Q | L | A | I | Q | V | R | Q | 108 |     |     |
| 151 | IDV-N | ---- | DTITEGAA | -- | TFSEHV  | AKLRILAGD | V | V | D | K | F | L | A | T | T | M | - | S | - | D | T | N | N | Q | L | A | V | Q | V | R | Q | 108 |     |     |
| 152 | IDV-N | ---- | DTITEGAA | -- | TFTEHV  | AKLRILAGD | V | V | D | K | F | L | A | T | T | M | - | S | - | D | T | N | N | Q | L | A | I | Q | V | R | Q | 108 |     |     |
| 153 | MDP-Y | ---- | DDFEESAA | -- | TFQEVST | KLKILGGD  | I | L | L | D | K | F | T | T | A | T | Q | - | S | - | A | L | N | D | Q | V | G | I | Q | L | Q | K   | 108 |     |
| 154 | IDV-N | ---- | DTITEGAA | -- | TFTEHV  | AKLRILAGD | V | V | D | K | F | L | A | T | T | M | - | S | - | D | T | N | N | Q | L | A | V | Q | V | R | Q | 108 |     |     |
| 155 | IDV-N | ---- | DTIAEGAA | -- | TFSEHV  | AKLRILAGD | V | V | D | K | F | L | A | T | T | M | - | S | - | D | T | N | N | Q | L | A | V | Q | V | R | Q | 108 |     |     |
| 156 | IDV-N | ---- | DTITEGAA | -- | TFTEHV  | AKLRILAGD | V | V | D | K | F | L | A | T | T | M | - | S | - | D | T | N | N | Q | L | A | I | Q | V | R | Q | 108 |     |     |
| 157 | IDV-N | ---- | DTITEGAA | -- | TFTEHV  | AKLRILAGD | V | V | D | K | F | L | A | T | T | M | - | S | - | D | T | N | N | Q | L | A | I | Q | V | R | Q | 108 |     |     |
| 158 | IDV-N | ---- | DTIAEGAA | -- | TFSEHV  | AKLRILAGD | V | V | D | K | F | L | A | T | T | M | - | S | - | D | T | N | N | Q | L | A | V | Q | V | R | Q | 108 |     |     |
| 159 | IDV-N | ---- | DTIAEGAA | -- | TFSEHV  | AKLRILAGD | V | V | D | K | F | L | A | T | T | M | - | S | - | D | T | N | N | Q | L | A | V | Q | V | R | Q | 108 |     |     |
| 160 | IDV-N | ---- | DTIAEGAA | -- | TFSEHV  | AKLRILAGD | V | V | D | K | F | L | A | T | T | M | - | S | - | D | T | N | N | Q | L | A | V | Q | V | R | Q | 108 |     |     |
| 161 | LDP-N | ---- | EEIKESAS | -- | TFEEVT  | AKLRILAGD | V | D | I | D | K | F | L | D | S | T | M | - | D | - | D | T | N | N | Q | M | A | I | Q | V | T | Q   | 108 |     |
| 162 | LDP-S | ---- | ETVNEGAA | -- | TFEEIV  | TRLRILIGD | V | V | D | K | F | L | M | Q | G | T | L | - | S | - | D | H | N | N | Q | K | A | I | Q | I | A | Q   | 108 |     |
| 163 | IDV-N | ---- | DTIAEGAA | -- | TFSEHV  | AKLRILAGD | V | V | D | K | F | L | A | T | T | M | - | S | - | D | T | N | N | Q | L | A | V | Q | V | R | Q | 108 |     |     |
| 164 | IDV-N | ---- | DTITEGAA | -- | TFTEHV  | AKLRILAGD | V | V | D | K | F | L | A | T | T | M | - | S | - | D | T | N | N | Q | L | A | I | Q | V | R | Q | 108 |     |     |
| 165 | IDV-N | ---- | DTITEGAA | -- | TFTEHV  | AKLRILAGD | V | V | D | K | F | L | T | T | T | M | - | S | - | D | T | N | N | Q | L | A | I | Q | V | R | Q | 108 |     |     |
| 166 | IDV-N | ---- | DTITEGAA | -- | TFTEHV  | AKLRILAGD | V | V | D | K | F | L | A | T | T | M | - | S | - | D | T | N | N | Q | L | A | I | Q | V | R | Q | 108 |     |     |
| 167 | IDV-N | ---- | DTITEGAA | -- | TFTEHV  | AKLRILAGD | V | V | D | K | F | L | A | T | T | M | - | S | - | D | T | N | N | Q | L | A | I | Q | V | R | Q | 108 |     |     |
| 168 | IDV-N | ---- | DTITEGAA | -- | TFTEHV  | AKLRILAGD | V | V | D | K | F | L | A | T | T | M | - | S | - | D | T | N | N | Q | L | A | I | Q | V | R | Q | 108 |     |     |
| 169 | IDV-N | ---- | DTITEGAA | -- | TFTEHV  | AKLRILAGD | V | V | D | K | F | L | A | T | T | M | - | S | - | D | T | N | N | Q | L | A | I | Q | V | R | Q | 108 |     |     |
| 170 | IDV-N | ---- | DTIPEGAA | -- | TFEECV  | AKLRILAGD | V | V | D | K | F | L | A | T | T | M | - | A | - | D | T | N | N | Q | L | A | I | Q | V | R | Q | 108 |     |     |
| 171 | IDV-N | ---- | DTITEGAA | -- | TFTEHV  | AKLRILAGD | V | V | D | K | F | L | A | T | T | M | - | S | - | D | T | N | N | Q | L | A | I | Q | V | R | Q | 108 |     |     |
| 172 | IDV-N | ---- | DTIAEGAA | -- | TFSEHV  | AKLRILAGD | V | V | D | K | F | L | A | T | T | M | - | S | - | D | T | N | N | Q | L | A | V | Q | V | R | Q | 108 |     |     |
| 173 | IDV-N | ---- | DTIPEGAA | -- | TFEECV  | AKLRILAGD | V | V | D | K | F | L | A | T | T | M | - | A | - | D | T | N | N | Q | L | A | I | Q | V | R | Q | 108 |     |     |
| 174 | IDV-N | ---- | DTIPEGAA | -- | TFEEKV  | AKLRILAGD | V | V | D | K | F | L | A | T | T | M | - | A | - | D | T | N | N | Q | L | A | I | Q | V | R | Q | 108 |     |     |
| 175 | IDV-N | ---- | DTIPEGAA | -- | TFEEKV  | AKLRILAGD | V | V | D | K | F | L | A | T | T | M | - | A | - | D | T | N | N | Q | L | A | I | Q | V | R | Q | 108 |     |     |
| 176 | IDV-N | ---- | DTIAEGAA | -- | TFTEHV  | AKLRILAGD | V | V | D | K | F | L | A | T | T | M | - | S | - | D | T | N | N | Q | L | A | I | Q | V | R | Q | 108 |     |     |
| 177 | IDV-N | ---- | DTIAEGAA | -- | TFSEHV  | AKLRILAGD | V | V | D | K | F | L | A | T | T | M | - | S | - | D | T | N | N | Q | L | A | V | Q | V | R | Q | 108 |     |     |
| 178 | IDV-N | ---- | DTIAEGAA | -- | TFSEHV  | AKLRILAGD | V | V | D | K | F | L | A | T | T | M | - | S | - | D | T | N | N | Q | L | A | V | Q | V | R | Q | 108 |     |     |
| 179 | IDV-N | ---- | DTIPEGAA | -- | TFEECV  | AKLRILAGD | V | V | D | K | F | L | A | T | T | M | - | A | - | D | T | N | N | Q | L | A | I | Q | V | R | Q | 108 |     |     |
| 180 | IDV-N | ---- | DTITEGAA | -- | TFTEHV  | AKLRILAGD | V | V | D | K | F | L | A | T | T | M | - | S | - | D | T | N | N | Q | L | A | I | Q | V | R | Q | 108 |     |     |
| 181 | IDV-N | ---- | DTIPEGAA | -- | TFEEKV  | AKLRILAGD | V | V | D | K | F | L | A | T | T | M | - | A | - | D | T | N | N | Q | L | A | I | Q | V | R | Q | 108 |     |     |
| 182 | IDV-N | ---- | DTIPEGAA | -- | TFEECV  | AKLRILAGD | V | V | D | K | F | L | A | T | T | M | - | A | - | D | T | N | N | Q | L | A | I | Q | V | R | Q | 108 |     |     |
| 183 | IDV-N | ---- | DTIPEGAA | -- | TFEEKV  | AKLRILAGD | V | V | D | K | F | L | A | T | T | M | - | A | - | D | T | N | N | Q | L | A | I | Q | V | R | Q | 108 |     |     |
| 184 | IDV-N | ---- | DTIPEGAA | -- | TFEECV  | AKLRILAGD | V | V | D | K | F | L | A | T | T | M | - | A | - | D | T | N | N | Q | L | A | I | Q | V | R | Q | 108 |     |     |
| 185 | IDV-N | ---- | DTIAEGAA | -- | TFSEHV  | AKLRILAGD | V | V | D | K | F | L | A | T | T | M | - | S | - | D | T | N | N | Q | L | A | V | Q | V | R | Q | 108 |     |     |
| 186 | IDV-N | ---- | DTIPEGAA | -- | TFEEKV  | AKLRILAGD | V | V | D | K | F | L | A | T | T | M | - | A | - | D | T | N | N | Q | L | A | I | Q | V | R | Q | 108 |     |     |
| 187 | IDV-N | ---- | DTIPEGAA | -- | TFEECV  | AKLRILAGD | V | V | D | K | F | L | A | T | T | M | - | A | - | D |   |   |   |   |   |   |   |   |   |   |   |     |     |     |

|     |     |    |     |      |       |     |      |             |           |             |           |              |              |              |     |
|-----|-----|----|-----|------|-------|-----|------|-------------|-----------|-------------|-----------|--------------|--------------|--------------|-----|
| 191 | IDV | -N | --- | DTIA | EGAA  | --- | TFSE | HVAKLRILAGD | V         | VDKFLATTM   | -A        | DTNNQLAIQVRQ | 108          |              |     |
| 192 | LSA | -Y | --- | EDV  | PEGAA | --- | TFDE | VSTKCKVLAG  | QILL      | DNFTTESM    | -S        | DLNPQLGIQIRS | 108          |              |     |
| 193 | IDV | -N | --- | DTI  | PEGAA | --- | TFEE | CVAKLRILAGD | V         | VDKFLATTM   | -A        | DTNNQLAIQVRQ | 108          |              |     |
| 194 | IDV | -N | --- | DTI  | PEGAA | --- | TFEE | CVAKLRILAGD | V         | VDKFLATTM   | -A        | DTNNQLAIQVRQ | 108          |              |     |
| 195 | IDV | -N | --- | DTI  | TEGAA | --- | TFEE | KVAKLRILAGD | V         | VDKFLATTM   | -A        | DTNNQLAIQVRQ | 108          |              |     |
| 196 | IDV | -N | --- | DTI  | PEGAA | --- | TFEE | CVAKLRILAGD | V         | VDKFLATTM   | -A        | DTNNQLAIQVRQ | 108          |              |     |
| 197 | IDV | -N | --- | DTI  | PEGAA | --- | TFEE | CVAKLRILAGD | V         | VDKFLATTM   | -A        | DTNNQLAIQVRQ | 108          |              |     |
| 198 | IDV | -N | --- | DTI  | PEGAA | --- | TFEE | CVAKLRILAGD | V         | VDKFLATTM   | -A        | DTNNQLAIQVRQ | 108          |              |     |
| 199 | IDV | -N | --- | DTI  | PEGAA | --- | TFEE | CVAKLRILAGD | V         | VDKFLSTTM   | -A        | DTNNQLAIQVRQ | 108          |              |     |
| 200 | IDV | -N | --- | DTI  | PEGAA | --- | TFEE | KVAKLRILAGD | V         | VDKFLATTM   | -A        | DTNNQLAIQVRQ | 108          |              |     |
| 201 | IDV | -N | --- | DTI  | PEGAA | --- | TFEE | CVAKLRILAGD | V         | VDKFLATTM   | -A        | DTNNQLAIQVRQ | 108          |              |     |
| 202 | LDP | -Y | --- | EDF  | TEGAA | --- | TFDP | VSTRLRV     | LGGD      | ILMDKFTTTVQ | -S        | GINDQIGIQLQL | 108          |              |     |
| 203 | IDV | -N | --- | DTI  | PEGAA | --- | TFEE | KVAKLRILAGD | V         | VDKFLATTM   | -A        | DTNNQLAIQVRQ | 108          |              |     |
| 204 | LDP | -N | --- | DTV  | NESAA | --- | TFTE | VVTKLRLAGD  | V         | IDKFLQTTM   | -G        | DTNDQMAIQIAK | 108          |              |     |
| 205 | IDV | -N | --- | DTI  | PEGAA | --- | TFEE | CVAKLRILAGD | V         | VDKFLATTM   | -A        | DTNNQLAIQVRQ | 108          |              |     |
| 206 | IDV | -N | --- | DTI  | PEGAA | --- | TFEE | CVAKL       | C         | ILAGD       | V         | VDKFLATTM    | -A           | DTNNQLAIQVRQ | 108 |
| 207 | IDV | -N | --- | DTI  | PEGAA | --- | TFEE | CVAKLRILAGD | V         | VDKFLATTM   | -A        | DTNNQLAIQVRQ | 108          |              |     |
| 208 | IDV | -N | --- | DTI  | PEGAA | --- | TFEE | KVAKLRILAGD | V         | VDKFLATTM   | -A        | DTNNQLAIQVRQ | 108          |              |     |
| 209 | IDV | -N | --- | DTI  | PEGAA | --- | TFEE | CVAKLRILAGD | V         | VDKFLATTM   | -A        | DTNNQLAIQVRQ | 108          |              |     |
| 210 | IDV | -N | --- | DTI  | TEGAA | --- | TFEE | KVAKLRILAGD | V         | VDKFLATTM   | -A        | DTNNQLAIQVRQ | 108          |              |     |
| 211 | IDV | -N | --- | DTI  | PEGAA | --- | TFEE | CVAKLRILAGD | V         | VDKFLATTM   | -A        | DTNNQLAIQVRQ | 108          |              |     |
| 212 | IDV | -N | --- | DTI  | PEGAA | --- | TFEE | CVAKLRILAGD | V         | VDKFLATTM   | -A        | DTNNQLAIQVRQ | 108          |              |     |
| 213 | IDV | -N | --- | DTI  | PEGAA | --- | TFEE | CVAKLRILAGD | V         | VDKFLATTM   | -A        | DTNNQLAIQVRQ | 108          |              |     |
| 214 | IDV | -N | --- | DTI  | AEGAA | --- | TFSE | HVAKLRILAGD | V         | VDKFLATTM   | -S        | DTNNQLAVQVRQ | 108          |              |     |
| 215 | IDV | -N | --- | DTI  | TEGAA | --- | TFEE | CVAKLRILAGD | V         | VDKFLATTM   | -A        | DTNNQLAIQVRQ | 108          |              |     |
| 216 | IDV | -N | --- | DTI  | TEGAA | --- | TFEE | KVAKLRILAGD | V         | VDKFLATTM   | -A        | DTNNQLAIQVRQ | 108          |              |     |
| 217 | IDV | -N | --- | DTI  | PEGAA | --- | TFEE | CVAKLRILAGD | V         | VDKFLATTM   | -A        | DTNNQLAIQVRQ | 108          |              |     |
| 218 | IDV | -N | --- | DTI  | PEGAA | --- | TFEE | CVAKLRILAGD | V         | VDKFLATTM   | -A        | DTNNQLAIQVRQ | 108          |              |     |
| 219 | IDV | -N | --- | DTI  | TEGAA | --- | TFEE | CVAKLRILAGD | V         | VDKFLATTM   | -A        | DTNNQLAIQVRQ | 108          |              |     |
| 220 | IDV | -N | --- | DTI  | TEGAA | --- | TFEE | CVAKLRILAGD | V         | VDKFLATTM   | -A        | DTNNQLAIQVRQ | 108          |              |     |
| 221 | IDV | -N | --- | DTI  | PEGAA | --- | TFEE | C           | IAKLRLAGD | V           | VDKFLATTM | -A           | DTNNQLAIQVRQ | 108          |     |
| 222 | IDV | -N | --- | DTI  | PEGAA | --- | TFEE | CVAKLRILAGD | V         | VDKFLATTM   | -A        | DTNNQLAIQVRQ | 108          |              |     |
| 223 | IDV | -N | --- | DTI  | PEGAA | --- | TFEE | CVAKLRILAGD | V         | VDKFLATTM   | -A        | DTNNQLAIQVRQ | 108          |              |     |
| 224 | IDV | -N | --- | DTI  | TEGAA | --- | TFEE | KVAKLRILAGD | V         | VDKFLATTM   | -A        | DTNNQLAIQVRQ | 108          |              |     |
| 225 | IDV | -N | --- | DTI  | PEGAA | --- | TFEE | CVAKLRILAGD | V         | VDKFLATTM   | -A        | DTNNQLAIQVRQ | 108          |              |     |
| 226 | IDV | -N | --- | DTI  | PEGAA | --- | TFEE | CVAKLRILAGD | V         | VDKFLATTM   | -A        | DTNNQLAIQVRQ | 108          |              |     |
| 227 | IDV | -N | --- | DTI  | PEGAA | --- | TFEE | CVAKLRILAGD | V         | VDKFLATTM   | -A        | DTNNQLAIQVRQ | 108          |              |     |
| 228 | LDP | -N | --- | EVV  | NESAS | --- | TFTE | VVAKLRIL    | I         | IGD         | V         | VDKFLQTTQ    | -S           | DHNNQLAIQIAK | 108 |
| 229 | IDV | -N | --- | DTI  | TEGAA | --- | TFEE | CVAKLRILAGD | V         | VDKFLATTM   | -A        | DTNNQLAIQVRQ | 108          |              |     |
| 230 | LDP | -N | --- | EVV  | NESAS | --- | TFTE | VVAKLRIL    | I         | IGD         | V         | VDKFLQTTQ    | -S           | DHNNQLAIQIAK | 108 |
| 231 | IDV | -N | --- | DTI  | PEGAA | --- | TFEE | CVAKLRILAGD | V         | VDKFLATTM   | -A        | DTNNQLAIQVRQ | 108          |              |     |
| 232 | IDV | -N | --- | DTI  | AEGAA | --- | TFSE | HVAKLRILAGD | V         | VDKFLATTM   | -A        | DTNNQLAIQVRQ | 108          |              |     |
| 233 | IDV | -N | --- | DTI  | TEGAA | --- | TFEE | CVAKLRILAGD | V         | VDKFLATTM   | -A        | DTNNQLAIQVRQ | 108          |              |     |
| 234 | IDV | -N | --- | DTI  | PEGAA | --- | TFEE | CVAKLRILAGD | V         | VDKFLATTM   | -A        | DTNNQLAIQVRQ | 108          |              |     |
| 235 | IDV | -N | --- | DTI  | PEGAA | --- | TFEE | KVAKLRILAGD | V         | VDKFLATTM   | -A        | DTNNQLAIQVRQ | 108          |              |     |
| 236 | IDV | -N | --- | DTI  | TEGAA | --- | TFEE | CVAKLRILAGD | V         | VDKFLATTM   | -A        | DTNNQLAIQVRQ | 108          |              |     |
| 237 | IDV | -N | --- | DTI  | PEGAA | --- | TFEE | CVAKLRILAGD | V         | VDKFLATTM   | -A        | DTNNQLAIQVRQ | 108          |              |     |
| 238 | IDV | -N | --- | DTI  | TEGAA | --- | TFEE | KVAKLRILAGD | V         | VDKFLATTM   | -A        | DTNNQLAIQVRQ | 108          |              |     |
| 239 | YDV | -G | --- | DTW  | TESTP | --- | TFEQ | VTTGLK      | I         | LGGDADIDHFL | LQTY      | -R           | DPNQLEAVVLQQ | 108          |     |
| 240 | IDV | -N | --- | DTI  | AEGAA | --- | TFSE | HVAKLRILAGD | V         | VDKFLATTM   | -S        | DTNNQLAVQVRQ | 108          |              |     |
| 241 | IDV | -N | --- | DTI  | TEGAA | --- | TFSE | HVAKLRILAGD | V         | VDKFLATTM   | -S        | DTNNQLAIQVRQ | 108          |              |     |
| 242 | IDV | -N | --- | DTI  | PEGAA | --- | TFEE | CVAKLRILAGD | V         | VDKFLATTM   | -A        | DTNNQLAIQVRQ | 108          |              |     |
| 243 | IDV | -N | --- | DTI  | TEGAA | --- | TFEE | KVAKLRILAGD | V         | VDKFLATTM   | -A        | DTNNQLAIQVRQ | 108          |              |     |
| 244 | IDV | -N | --- | DTI  | TEGAA | --- | TFEE | CVAKLRILAGD | V         | VDKFLATTM   | -A        | DTNNQLAIQVRQ | 108          |              |     |
| 245 | IDV | -N | --- | DTI  | PEGAA | --- | TFEE | CVAKLRILAGD | V         | VDKFLATTM   | -A        | DTNNQLAIQVRQ | 108          |              |     |
| 246 | IDV | -N | --- | DTI  | TEGAA | --- | TFEE | KVAKLRILAGD | V         | VDKFLATTM   | -A        | DTNNQLAIQVRQ | 108          |              |     |
| 247 | IDV | -N | --- | DTI  | TEGAA | --- | TFEE | CVAKLRILAGD | V         | VDKFLATTM   | -A        | DTNNQLAIQVRQ | 108          |              |     |
| 248 | IDV | -N | --- | DTI  | PEGAA | --- | TFEE | CVAKLRILAGD | V         | VDKFLATTM   | -A        | DTNNQLAIQVRQ | 108          |              |     |
| 249 | IDV | -N | --- | DTI  | PEGAA | --- | TFEE | CVAKLRILAGD | V         | VDKFLATTM   | -A        | DTNNQLAIQVRQ | 108          |              |     |
| 250 | IDV | -N | --- | DTI  | PEGAA | --- | TFEE | CVAKLRILAGD | V         | VDKFLATTM   | -A        | DTNNQLAIQVRQ | 108          |              |     |
| 251 | IDV | -N | --- | DTI  | TEGAA | --- | TFTE | HVAKLRILAGD | V         | VDKFLATTM   | -S        | DTNNQLAIQVRQ | 108          |              |     |
| 252 | IDV | -N | --- | DTI  | SEGAA | --- | TFEE | CVAKLRILAGD | V         | VDKFLATTM   | -A        | DTNNQLAIQVRQ | 108          |              |     |
| 253 | IDV | -N | --- | DTI  | PEGAA | --- | TFEE | CVAKLRILAGD | V         | VDKFLATTM   | -A        | DTNNQLAIQVRQ | 108          |              |     |
| 254 | IDV | -N | --- | DTI  | PEGAA | --- | TFEE | CVAKLRILAGD | V         | VDKFLATTM   | -A        | DTNNQLAIQVRQ | 108          |              |     |
| 255 | IDV | -N | --- | DTI  | PEGAA | --- | TFEE | CVAKLRILAGD | V         | VDKFLATTM   | -A        | DTNNQLAIQVRQ | 108          |              |     |
| 256 | IDV | -N | --- | DTI  | TEGAA | --- | TFSE | HVAKLRILAGD | V         | VDKFLATTM   | -S        | DTNNQLAIQVRQ | 108          |              |     |
| 257 | IDV | -N | --- | DTI  | TEGAA | --- | TFSE | HVAKLRILAGD | V         | VDKFLATTM   | -S        | DTNNQLAIQVRQ | 108          |              |     |

[illegible]

|     |       |     |     |     |       |       |      |      |            |            |           |           |              |              |     |              |    |              |     |   |   |   |   |   |   |   |    |              |              |     |              |     |
|-----|-------|-----|-----|-----|-------|-------|------|------|------------|------------|-----------|-----------|--------------|--------------|-----|--------------|----|--------------|-----|---|---|---|---|---|---|---|----|--------------|--------------|-----|--------------|-----|
| 325 | IDV   | -N  | --- | DTI | PEGAA | --    | TFEE | C    | VAKLRILAGD | V          | VDKFLATTM | -A        | DTNNQLAIQVRQ | 108          |     |              |    |              |     |   |   |   |   |   |   |   |    |              |              |     |              |     |
| 326 | IDV   | -N  | --- | DTI | TEGAA | --    | TFEE | K    | VAKLRILAGD | V          | VDKFLATTM | -A        | DTNNQLAIQVRQ | 108          |     |              |    |              |     |   |   |   |   |   |   |   |    |              |              |     |              |     |
| 327 | IDV   | -N  | --- | DTI | TEGAA | --    | TFEE | K    | VAKLRILAGD | V          | VDKFLATTM | -A        | DTNNQLAIQVRQ | 108          |     |              |    |              |     |   |   |   |   |   |   |   |    |              |              |     |              |     |
| 328 | IDV   | -N  | --- | DTI | TEGAA | --    | TFEE | K    | VAKLRILAGD | V          | VDKFLATTM | -A        | DTNNQLAIQVRQ | 108          |     |              |    |              |     |   |   |   |   |   |   |   |    |              |              |     |              |     |
| 329 | IDV   | -N  | --- | DTI | TEGAA | --    | TFTE | H    | VAKLRILAGD | V          | VDKFLATTM | -S        | DTNNQLAIQVRQ | 108          |     |              |    |              |     |   |   |   |   |   |   |   |    |              |              |     |              |     |
| 330 | IDV   | -N  | --- | DTI | TEGAA | --    | TFTE | H    | VAKLRILAGD | V          | VDKFLATTM | -S        | DTNNQLAIQVRQ | 108          |     |              |    |              |     |   |   |   |   |   |   |   |    |              |              |     |              |     |
| 331 | IDV   | -N  | --- | DTI | TEGAA | --    | TFEE | K    | VAKLRILAGD | V          | VDKFLATTM | -A        | DTNNQLAIQVRQ | 108          |     |              |    |              |     |   |   |   |   |   |   |   |    |              |              |     |              |     |
| 332 | IDV   | -N  | --- | DTI | TEGAA | --    | TFTE | H    | VAKLRILAGD | V          | VDKFLATTM | -S        | DTNNQLAIQVRQ | 108          |     |              |    |              |     |   |   |   |   |   |   |   |    |              |              |     |              |     |
| 333 | IDV   | -N  | --- | DTI | TEGAA | --    | TFTE | H    | VAKLRILAGD | V          | VDKFLATTM | -S        | DTNNQLAIQVRQ | 108          |     |              |    |              |     |   |   |   |   |   |   |   |    |              |              |     |              |     |
| 334 | IDV   | -N  | --- | DTI | TEGAA | --    | TFTE | H    | VAKLRILAGD | V          | VDKFLATTM | -S        | DTNSQLAIQVRQ | 108          |     |              |    |              |     |   |   |   |   |   |   |   |    |              |              |     |              |     |
| 335 | IDV   | -N  | --- | DTI | AEGAA | --    | TFTE | H    | VAKLRILAGD | V          | VDKFLATTM | -S        | DTNNQLAIQVRQ | 108          |     |              |    |              |     |   |   |   |   |   |   |   |    |              |              |     |              |     |
| 336 | IDV   | -N  | --- | DTI | TEGAA | --    | TFEE | K    | VAKLRILAGD | V          | VDKFLATTM | -A        | DTNNQLAIQVRQ | 108          |     |              |    |              |     |   |   |   |   |   |   |   |    |              |              |     |              |     |
| 337 | IDV   | -N  | --- | DN  | I     | TEGAA | --   | TFTE | H          | VAKLRILAGD | V         | VDKFLATTM | -S           | DTNNQLAIQVRQ | 108 |              |    |              |     |   |   |   |   |   |   |   |    |              |              |     |              |     |
| 338 | IDV   | -N  | --- | DTI | TEGAA | --    | TFEE | K    | VAKLRILAGD | V          | VDKFLATTM | -A        | DTNNQLAIQVRQ | 108          |     |              |    |              |     |   |   |   |   |   |   |   |    |              |              |     |              |     |
| 339 | IDV   | -N  | --- | DTI | AEGAA | --    | TFTE | H    | VAKLRILAGD | V          | VDKFLATTM | -S        | DTNNQLAIQVRQ | 108          |     |              |    |              |     |   |   |   |   |   |   |   |    |              |              |     |              |     |
| 340 | IDV   | -N  | --- | DTI | TEGAA | --    | TFEE | K    | VAKLRILAGD | V          | VDKFLATTM | -A        | DTNNQLAIQVRQ | 108          |     |              |    |              |     |   |   |   |   |   |   |   |    |              |              |     |              |     |
| 341 | IDV   | -N  | --- | DTI | TEGAA | --    | TFTE | H    | VAKLRILAGD | V          | VDKFLATTM | -S        | DTNNQLAIQVRQ | 108          |     |              |    |              |     |   |   |   |   |   |   |   |    |              |              |     |              |     |
| 342 | IDV   | -N  | --- | DTI | AEGAA | --    | TFSE | H    | VAKLRILAGD | V          | VDKFLATTM | -S        | DTNNQLAVQVRQ | 108          |     |              |    |              |     |   |   |   |   |   |   |   |    |              |              |     |              |     |
| 343 | IDV   | -N  | --- | DTI | TEGAA | --    | TFTE | H    | VAKLRILAGD | V          | VDKFLATTM | -S        | DTNNQLAIQVRQ | 108          |     |              |    |              |     |   |   |   |   |   |   |   |    |              |              |     |              |     |
| 344 | IDV   | -N  | --- | DTI | TEGAA | --    | TFTE | H    | VAKLRILAGD | V          | VDKFLATTM | -S        | DTNNQLAIQVRQ | 108          |     |              |    |              |     |   |   |   |   |   |   |   |    |              |              |     |              |     |
| 345 | IDV   | -N  | --- | DTI | TEGAA | --    | TFEE | K    | VAKLRILAGD | V          | VDKFLATTM | -A        | DTNNQLAIQVRQ | 108          |     |              |    |              |     |   |   |   |   |   |   |   |    |              |              |     |              |     |
| 346 | IDV   | -N  | --- | DTI | TEGAA | --    | TFEE | C    | VAKLRILAGD | V          | VDKFLATTM | -A        | DTNNQLAIQVRQ | 108          |     |              |    |              |     |   |   |   |   |   |   |   |    |              |              |     |              |     |
| 347 | IDV   | -N  | --- | DTI | PEGAA | --    | TFEE | C    | VAKLRILAGD | V          | VDKFLATTM | -A        | DTNNQLAIQVRQ | 108          |     |              |    |              |     |   |   |   |   |   |   |   |    |              |              |     |              |     |
| 348 | IDV   | -N  | --- | DTI | SEGAA | --    | TFTE | H    | VAKLRILAGD | V          | VDKFLATTM | -S        | DTNSQLAIQVRQ | 108          |     |              |    |              |     |   |   |   |   |   |   |   |    |              |              |     |              |     |
| 349 | IDV   | -N  | --- | DTI | TEGAA | --    | TFSE | H    | VAKLRILAGD | V          | VDKFLATTM | -S        | DTNNQLAIQVRQ | 108          |     |              |    |              |     |   |   |   |   |   |   |   |    |              |              |     |              |     |
| 350 | IDV   | -N  | --- | DTI | TEGAA | --    | TFTE | H    | VAKLRILAGD | V          | VDKFLATTM | -S        | DTNNQLAIQVRQ | 108          |     |              |    |              |     |   |   |   |   |   |   |   |    |              |              |     |              |     |
| 351 | LDP   | -N  | --- | EV  | I     | EEEGS | --   | TFDE | V          | TAHLRILAGD | V         | VDKFL     | DST          | M            | -G  | DTNAQKAIQIKQ | 89 |              |     |   |   |   |   |   |   |   |    |              |              |     |              |     |
| 352 | IDV   | -N  | --- | DTI | AEGAA | --    | TFTE | H    | VAKLRILAGD | V          | VDKFLATTM | -S        | DTNNQLAIQVRQ | 108          |     |              |    |              |     |   |   |   |   |   |   |   |    |              |              |     |              |     |
| 353 | AGVGT | --- | --- | TIT | AKSPA | --    | TFTQ | V    | TSS        | L          | TSL       | L         | GD           | AE           | V   | NGLIQATR     | -S | NIQDQKAIQVAS | 110 |   |   |   |   |   |   |   |    |              |              |     |              |     |
| 354 | IDV   | -N  | --- | DTI | TEGAA | --    | TFEE | K    | VAKLRILAGD | V          | VDKFLATTM | -A        | DTNNQLAIQVRQ | 105          |     |              |    |              |     |   |   |   |   |   |   |   |    |              |              |     |              |     |
| 355 | IDV   | -N  | --- | DTI | TEGAA | --    | TFTE | H    | VAKLRILAGD | V          | VDKFLATTM | -S        | DTNSQLAIQVRQ | 108          |     |              |    |              |     |   |   |   |   |   |   |   |    |              |              |     |              |     |
| 356 | IDV   | -N  | --- | DTI | AEGAA | --    | TFTE | H    | VAKLRILAGD | V          | VDKFLATTM | -S        | DTNNQLAIQVRQ | 108          |     |              |    |              |     |   |   |   |   |   |   |   |    |              |              |     |              |     |
| 357 | IDV   | -N  | --- | DTI | TEGAA | --    | TFEE | K    | VAKLRILAGD | V          | VDKFLATTM | -A        | DTNNQLAIQVRQ | 108          |     |              |    |              |     |   |   |   |   |   |   |   |    |              |              |     |              |     |
| 358 | IDV   | -N  | --- | DTI | TEGAA | --    | TFSE | H    | VAKLRILAGD | V          | VDKFLATTM | -S        | DTNNQLAIQVRQ | 108          |     |              |    |              |     |   |   |   |   |   |   |   |    |              |              |     |              |     |
| 359 | IDV   | -N  | --- | DTI | TEGAA | --    | TLEE | K    | VAKLRILAGD | V          | VDKFLATTM | -A        | DTNNQLAIQVRQ | 108          |     |              |    |              |     |   |   |   |   |   |   |   |    |              |              |     |              |     |
| 360 | IDV   | -N  | --- | DTI | TEGAA | --    | TFTE | H    | VAKLRILAGD | V          | VDKFLATTM | -S        | DTNNQLAIQVRQ | 108          |     |              |    |              |     |   |   |   |   |   |   |   |    |              |              |     |              |     |
| 361 | IDV   | -N  | --- | DTI | TEGAA | --    | TFTE | H    | VAKLRILAGD | V          | VDKFLATTM | -A        | DTNNQLAIQVRQ | 108          |     |              |    |              |     |   |   |   |   |   |   |   |    |              |              |     |              |     |
| 362 | IDV   | -N  | --- | DTI | TEGAA | --    | TFEE | K    | VAKLRILAGD | V          | VDKFLATTM | -A        | DTNNQLAIQVRQ | 108          |     |              |    |              |     |   |   |   |   |   |   |   |    |              |              |     |              |     |
| 363 | IDV   | -N  | --- | DTI | TEGAA | --    | TFTE | H    | VAKLRILAGD | V          | VDKFLATTM | -S        | DTNNQLAIQVRQ | 108          |     |              |    |              |     |   |   |   |   |   |   |   |    |              |              |     |              |     |
| 364 | IDV   | -N  | --- | DTI | TEGAA | --    | TFTE | H    | VAKLRILAGD | V          | VDKFLATTM | -S        | DTNNQLAIQVRQ | 108          |     |              |    |              |     |   |   |   |   |   |   |   |    |              |              |     |              |     |
| 365 | IDV   | -N  | --- | DTI | TEGAA | --    | TFTE | H    | VAKLRILAGD | V          | VDKFLATTM | -S        | DTNSQLAIQVRQ | 108          |     |              |    |              |     |   |   |   |   |   |   |   |    |              |              |     |              |     |
| 366 | IDV   | -N  | --- | DTI | TEGAA | --    | TFTE | H    | VAKLRILAGD | V          | VDKFLATTM | -S        | DTNNQLAIQVRQ | 108          |     |              |    |              |     |   |   |   |   |   |   |   |    |              |              |     |              |     |
| 367 | IDV   | -N  | --- | DTI | SEGAA | --    | TFTE | H    | VAKLRILAGD | V          | VDKFLATTM | -S        | DTNSQLAIQVRQ | 108          |     |              |    |              |     |   |   |   |   |   |   |   |    |              |              |     |              |     |
| 368 | IDV   | -N  | --- | DTI | AEGAA | --    | TFTE | H    | VAKLRILAGD | V          | VDKFLATTM | -S        | DTNSQLAIQVRQ | 108          |     |              |    |              |     |   |   |   |   |   |   |   |    |              |              |     |              |     |
| 369 | IDV   | -N  | --- | DTI | TEGAA | --    | TFTE | H    | VAKLRILAGD | V          | VDKFLATTM | -S        | DTNNQLAIQVRQ | 108          |     |              |    |              |     |   |   |   |   |   |   |   |    |              |              |     |              |     |
| 370 | IDV   | -N  | --- | DTI | IEGAA | --    | TFTE | H    | VAKLRILAGD | V          | VDKFLATTM | -S        | DTNNQLAIQVRQ | 108          |     |              |    |              |     |   |   |   |   |   |   |   |    |              |              |     |              |     |
| 371 | IDV   | -N  | --- | DTI | SEGAA | --    | TFTE | H    | VAKLRILAGD | V          | VDKFLATTM | -S        | DTNNQLAIQVRQ | 108          |     |              |    |              |     |   |   |   |   |   |   |   |    |              |              |     |              |     |
| 372 | IDV   | -N  | --- | DTI | AEGAA | --    | TFTE | H    | VAKLRILAGD | V          | VDKFLATTM | -S        | DTNNQLAIQVRQ | 108          |     |              |    |              |     |   |   |   |   |   |   |   |    |              |              |     |              |     |
| 373 | IDV   | -N  | --- | DTI | TEGAA | --    | TFIE | H    | VAKLRILAGD | V          | VDKFLATTM | -S        | DTNNQLAIQVRQ | 108          |     |              |    |              |     |   |   |   |   |   |   |   |    |              |              |     |              |     |
| 374 | IDV   | -N  | --- | DTI | TEGAA | --    | TFTE | H    | VAKLRILAGD | V          | VDKFLATTM | -S        | DTNNQLAIQVRQ | 108          |     |              |    |              |     |   |   |   |   |   |   |   |    |              |              |     |              |     |
| 375 | IDV   | -N  | --- | DTI | AEGAA | --    | TFTE | H    | VAKLRILAGD | V          | VDKFLATTM | -S        | DTNNQLAIQVRQ | 108          |     |              |    |              |     |   |   |   |   |   |   |   |    |              |              |     |              |     |
| 376 | IDV   | -N  | --- | DTI | TEGAA | --    | TFEE | K    | VAKLRILAGD | V          | VDKFLATTM | -A        | DTNNQLAIQVRQ | 108          |     |              |    |              |     |   |   |   |   |   |   |   |    |              |              |     |              |     |
| 377 | YEV   | -G  | --- | DTW | ESTP  | --    | TFTQ | V    | T          | TGL        | K         | I         | L            | G            | G   | D            | A  | I            | D   | H | F | L | L | Q | T | Y | -R | DPNELEAIVIQS | 108          |     |              |     |
| 378 | IDV   | -N  | --- | DTI | TEGAA | --    | TFTE | H    | VAKLRILAGD | V          | VDKFLATTM | -S        | DTNNQLAIQVRQ | 108          |     |              |    |              |     |   |   |   |   |   |   |   |    |              |              |     |              |     |
| 379 | IDV   | -N  | --- | DTI | TEGAA | --    | TFTE | H    | VAKLRILAGD | V          | VDKFLATTM | -A        | DTNNQLAIQVRQ | 108          |     |              |    |              |     |   |   |   |   |   |   |   |    |              |              |     |              |     |
| 380 | IDV   | -N  | --- | DTI | SEGAA | --    | TFTE | H    | VAKLRILAGD | V          | VDKFLATTM | -S        | DTNSQLAIQVRQ | 108          |     |              |    |              |     |   |   |   |   |   |   |   |    |              |              |     |              |     |
| 381 | IDV   | -N  | --- | DTI | SEGAA | --    | TFTE | H    | VAKLRILAGD | V          | VDKFLATTM | -S        | DTNSQLAIQVRQ | 108          |     |              |    |              |     |   |   |   |   |   |   |   |    |              |              |     |              |     |
| 382 | IGVGD | --- | --- | TIT | AKAAA | --    | TFTQ | V    | T          | S          | N         | L         | T            | K            | I   | I            | G  | D            | A   | E | V | D | G | L | I | Q | A  | T            | R            | -S  | ADNDQTGVQIAS | 110 |
| 383 | IDV   | -N  | --- | DTI | AEGAA | --    | TFTE | H    | VAKLRILAGD | V          | VDKFLATTM | -S        | DTNNQLAIQVRQ | 108          |     |              |    |              |     |   |   |   |   |   |   |   |    |              |              |     |              |     |
| 384 | IDV   | -N  | --- | DTI | SEGAA | --    | TFTE | H    | VAKLRILAGD | V          | VDKFLATTM | -S        | DTNSQLAIQVRQ | 108          |     |              |    |              |     |   |   |   |   |   |   |   |    |              |              |     |              |     |
| 385 | IDV   | -N  | --- | DTI | TEGAA | --    | TFTE | H    | VAKLRILAGD | V          | VDKFLATTM | -S        | DTNNQLAIQVRQ | 108          |     |              |    |              |     |   |   |   |   |   |   |   |    |              |              |     |              |     |
| 386 | IDV   | -N  | --- | DTI | TEGAA | --    | TFEE | K    | VAKLRILAGD | V          | VDKFLATTM | -A        | DTNNQLAIQVRQ | 108          |     |              |    |              |     |   |   |   |   |   |   |   |    |              |              |     |              |     |
| 387 | IDPYN | --- | --- | DTV | PEEAS | --    | TVTD | V    | T          | V          | T         | L         | K            | T            | L   | I            | G  | D            | V   | D | K | F | L | A | T | T | M  | -S           | DTNDQKALQIAM | 109 |              |     |
| 388 | IDV   | -N  | --- | DTI | AEGAA | --    | TFTE | H    | VAKLRILAGD | V          | VDKFLATTM | -S        | DTNSQLAIQVRQ | 108          |     |              |    |              |     |   |   |   |   |   |   |   |    |              |              |     |              |     |
| 389 | IDV   | -N  | --- | DTI | TEGAA | --    | TFEE | K    | VAKLRILAGD | V          | VDKFLATTM | -A        | DTNNQLAIQVRQ | 108          |     |              |    |              |     |   |   |   |   |   |   |   |    |              |              |     |              |     |
| 390 | AGVGA | --- | --- | TIT | AKAAT | --    | TFTS | V    | T          | S          | V         | L         | T            | S            | I   | L            | G  | D            | A   | E | V | N | G | L | V | Q | A  | T            | Q            | -S  | PDTDQTAQQIAS | 110 |
| 391 | IDV   | -N  | --- | DTI | SEGAA | --    | TFTE | H    | VAKLRILAGD | V          | VDKFLATTM | -S        | DTNSQLAIQVRQ | 108          |     |              |    |              |     |   |   |   |   |   |   |   |    |              |              |     |              |     |



|     |       |     |     |          |      |     |           |             |   |                |     |              |     |
|-----|-------|-----|-----|----------|------|-----|-----------|-------------|---|----------------|-----|--------------|-----|
| 392 | IDV   | -N  | --- | DTIT     | EGAA | --- | TFTEH     | VAKLRILAGD  | V | VDKFLATTM      | -S  | DTNNQLAIQVRQ | 108 |
| 393 | IDV   | -N  | --- | DTIT     | EGAA | --- | TFTEH     | VAKLRILAGD  | V | VDKFLATTM      | -S  | DTNNQLAIRVRQ | 108 |
| 394 | IDV   | -N  | --- | DTIS     | EGAA | --- | TFTEH     | VAKLRILAGD  | V | VDKFLATTM      | -S  | DTNSQLAIQVRQ | 108 |
| 395 | IDV   | -N  | --- | DTIA     | EGAA | --- | TFTEH     | VAKLRILAGD  | V | VDKFLATTM      | -S  | DTNSQLAIQVRQ | 108 |
| 396 | IDV   | -N  | --- | ETIA     | EGAA | --- | TFTEH     | VAKLRILAGD  | V | VDKFLATTM      | -A  | DTNNQLAIQVRQ | 108 |
| 397 | AGVGS | --- | --- | TITAKNPA | ---  | --- | TFTQVTSTL | TTIIGDAE    | V | NGLIQATR       | -SG | DGNDQTAVQVAS | 111 |
| 398 | IDV   | -N  | --- | DTIPE    | EGAA | --- | TFEEC     | VAKLRILAGD  | V | VDKFLATTM      | -A  | DTNNQLAIQVRQ | 108 |
| 399 | IDV   | -N  | --- | DTIA     | EGAA | --- | TFTEH     | VAKLRILAGD  | V | VDKFLATTM      | -S  | DTNNQLAIQVRQ | 108 |
| 400 | IDV   | -N  | --- | DTIS     | EGAA | --- | TFTEH     | VAKLRILAGD  | V | VDKFLATTM      | -S  | DTNSQLAIQVRQ | 108 |
| 401 | IDV   | -N  | --- | DTIS     | EGAA | --- | TFTEH     | VAKLRILAGD  | V | VDKFLATTM      | -S  | DTNSQLAIQVRQ | 108 |
| 402 | IDV   | -N  | --- | DTIA     | EGAA | --- | TFTEH     | VAKLRILAGD  | V | VDKFLATTM      | -S  | DTNSQLAIQVRQ | 108 |
| 403 | IDV   | -N  | --- | DTIT     | EGAA | --- | TFEEK     | VAKLRILAGD  | V | VDKFLATTM      | -A  | DTNNQLAIQVRQ | 108 |
| 404 | IDV   | -N  | --- | DTIT     | EGAA | --- | TFEEK     | VAKLRILAGD  | V | VDKFLATTM      | -A  | DTNNQLAIQVRQ | 108 |
| 405 | IDV   | -N  | --- | DTIPE    | EGAA | --- | TFEEC     | VAKLRILAGD  | V | VDKFLATTM      | -A  | DTNNQLAIQVRQ | 108 |
| 406 | IDV   | -N  | --- | DTIA     | EGAA | --- | TFTEH     | VAKLRILAGD  | V | VDKFLATTM      | -S  | DTNSQLAIQVQC | 108 |
| 407 | IDV   | -N  | --- | DTIT     | EGAA | --- | TFEEK     | VAKLRILAGD  | V | VDKFLATTM      | -A  | DTNNQLAIQVRQ | 108 |
| 408 | IDV   | -N  | --- | DTIT     | EGAA | --- | TFTEH     | VAKLRILAGD  | V | VDKFLATTM      | -S  | DTNNQLAIQVRQ | 108 |
| 409 | IDV   | -N  | --- | DTIS     | EGAA | --- | TFTEH     | VAKLRILAGD  | V | VDKFLATTM      | -S  | DTNSQLAIQVRQ | 108 |
| 410 | IDV   | -N  | --- | DTIS     | EGAA | --- | TFTEH     | VAKLRILAGD  | V | VDKFLATTM      | -S  | DTNSQLAIQVRQ | 108 |
| 411 | IDV   | -N  | --- | DTIA     | EGAA | --- | TFTEH     | VAKLRILAGD  | V | VDKFLATTM      | -S  | DTNSQLAIQVRQ | 108 |
| 412 | IDV   | -N  | --- | DTIS     | EGAA | --- | TFTEH     | VAKLRILAGD  | V | VDKFLATTM      | -S  | DTNSQLAIQVRQ | 108 |
| 413 | IDV   | -N  | --- | DTIPE    | EGAA | --- | TFEEC     | VAKLRILAGD  | V | VDKFLATTM      | -A  | DTNNQLAIQVRQ | 108 |
| 414 | IDV   | -N  | --- | DTIA     | EGAA | --- | TFTEH     | VAKLRILAGD  | V | VDKFLATTM      | -S  | DTNSQLAIQVRQ | 108 |
| 415 | IDV   | -N  | --- | DTIA     | EGAA | --- | TFTEH     | VAKLRILAGD  | V | VDKFLATTM      | -S  | DTNSQLAIQVRQ | 108 |
| 416 | IDV   | -N  | --- | DTIS     | EGAA | --- | TFTEH     | VAKLRILAGD  | V | VDKFLATTM      | -S  | DTNSQLAIQVRQ | 108 |
| 417 | IDV   | -N  | --- | ETIA     | EGAA | --- | TFTEH     | VAKLRILAGD  | V | VDKFLATTM      | -A  | DTNNQLAIQVRQ | 108 |
| 418 | IDV   | -N  | --- | DTIT     | EGAA | --- | TFTEH     | VAKLRILAGD  | V | VDKFLATTM      | -S  | DTNNQLAIQVRQ | 108 |
| 419 | YDA-Y | --- | --- | EDIE     | ESAA | --- | KYVE      | VETKLKV     | L | AGQVDIDNFTAETQ | -S  | ELNDQVALQLAA | 108 |
| 420 | IDV   | -N  | --- | DTIA     | EGAA | --- | TFTEH     | VAKLRILAGD  | V | VDKFLATTM      | -S  | DTNSQLAIQVRQ | 108 |
| 421 | IDV   | -N  | --- | DTIPE    | EGAA | --- | TFEEC     | VAKLRILAGD  | V | VDKFLATTM      | -A  | DTNNQLAIQVRQ | 108 |
| 422 | IDV   | -N  | --- | DTIA     | EGAA | --- | TFSEH     | VAKLRILAGD  | V | VDKFLATTM      | -S  | DTNNQLAVQVRQ | 108 |
| 423 | IDV   | -N  | --- | ETIA     | EGAA | --- | TFTEH     | VAKLRILAGD  | V | VDKFLATTM      | -A  | DTNNQLAIQVRQ | 108 |
| 424 | IDV   | -N  | --- | DTIS     | EGAA | --- | TFTEH     | VAKLRILAGD  | V | VDKFLATTM      | -S  | DTNSQLAIQVRQ | 108 |
| 425 | IDV   | -N  | --- | DTIA     | EGAA | --- | TFSEH     | VAKLRILAGD  | V | VDKFLATTM      | -S  | DTNNQLAVQVRQ | 108 |
| 426 | IDV   | -N  | --- | DTIA     | EGAA | --- | TFSEH     | VAKLRILAGD  | V | VDKFLATTM      | -S  | DTNNQLAVQVRQ | 108 |
| 427 | IDV   | -N  | --- | DTIA     | EGAA | --- | TFSEH     | VAKLRILAGD  | V | VDKFLATTM      | -S  | DTNNQLAVQVRQ | 108 |
| 428 | IDV   | -N  | --- | DTIS     | EGAA | --- | TFTEH     | VAKLRILAGD  | V | VDKFLATTM      | -S  | DTNSQLAIQVRQ | 108 |
| 429 | IDV   | -N  | --- | DTIPE    | EGAA | --- | TFEEC     | VAKLRILAGD  | V | VDKFLATTM      | -A  | DTNNQLAIQVRQ | 108 |
| 430 | IDV   | -N  | --- | DTIA     | EGAA | --- | TFSEH     | VAKLRILAGD  | V | VDKFLATTM      | -S  | DTNNQLAVQVRQ | 108 |
| 431 | IDV   | -N  | --- | DTIS     | EGAA | --- | TFTEH     | VAKLRILAGD  | V | VDKFLATTM      | -S  | DTNSQLAIQVRQ | 108 |
| 432 | ATVGD | --- | --- | TITAKNAA | ---  | --- | TFTKVNSNL | TTILGDAE    | V | NGLIQATR       | -S  | ATTDQEATQIAS | 110 |
| 433 | IDV   | -N  | --- | DTIT     | EGAA | --- | TFEEK     | VAKLRILAGD  | V | VDKFLATTM      | -A  | DTNNQLAIQVRQ | 108 |
| 434 | IDV   | -N  | --- | DTIT     | EGAA | --- | TFEEK     | VAKLRILAGD  | V | VDKFLATTM      | -A  | DTNNQLAIQVRQ | 108 |
| 435 | IDV   | -N  | --- | DTIT     | EGAA | --- | TFEEK     | VAKLRILAGD  | V | VDKFLATTM      | -A  | DTNNQLAIQVRQ | 108 |
| 436 | IDV   | -N  | --- | DTIA     | EGAA | --- | TFTEH     | VAKLRILAGD  | V | VDKFLATTM      | -S  | DTNSQLAIQVRQ | 108 |
| 437 | IDV   | -N  | --- | DVVPE    | EGAA | --- | TFEEC     | VAKLRILAGD  | V | VDKFLATTM      | -A  | DTNNQLAIQVRQ | 108 |
| 438 | IDV   | -N  | --- | DTIA     | EGAA | --- | TFTEH     | VAKLRILAGD  | V | VDKFLATTM      | -S  | DTNSQLAIQVRQ | 108 |
| 439 | LDP   | -N  | --- | DTVQ     | ESAS | --- | TFTEV     | VAKLRILIGD  | V | VDKFLQATM      | -S  | DHNNQLAIQIAK | 108 |
| 440 | IDV   | -N  | --- | DTIPE    | EGAA | --- | TFEEC     | VAKLRILAGD  | V | VDKFLATTM      | -A  | DTNNQLAIQVRQ | 108 |
| 441 | YEV   | -G  | --- | DTWTE    | STP  | --- | TFTQVT    | TGLKILGGDAD | I | DHFLQQTY       | -R  | DPNELEAIVIQS | 108 |
| 442 | IDV   | -N  | --- | DVIPE    | EGAA | --- | KFTEH     | VAKLRILAGD  | V | VDKFLASTM      | -G  | DTNSQLAIQIRA | 108 |
| 443 | IDV   | -N  | --- | EVIPE    | EGAA | --- | TFTEHT    | AKLRIMAGD   | V | VDKFLATTM      | -D  | DTNSQLAIQVRQ | 108 |
| 444 | LGVGG | --- | --- | TITAKAAT | ---  | --- | TFTQVTSPL | KRIVGDAE    | V | DNFVEATH       | -S  | DTTDQEAVQVAG | 110 |
| 445 | IGVGG | --- | --- | TITAKTAA | ---  | --- | TFTQINSNL | TKIIGDAE    | V | DNMIQATR       | -S  | SINDQTGQQIAS | 110 |
| 446 | IDV   | -N  | --- | DTIPE    | EGAA | --- | TFEEC     | VAKLRILAGD  | V | VDKFLATTM      | -A  | DTNNQLAIQVRQ | 108 |
| 447 | IDV   | -N  | --- | DTIPE    | EGAA | --- | TFEEC     | VAKLRILAGD  | V | VDKFLATTM      | -A  | DTNNQLAIQVRQ | 108 |
| 448 | YDV   | -G  | --- | DTWAE    | ATP  | --- | TFTQVT    | VPLRILGGDAD | I | DNFLQQTY       | -A  | NPNDLEAVVLES | 106 |
| 449 | IDV   | -N  | --- | DTIPE    | EGAA | --- | TFEEC     | VAKLRILAGD  | V | VDKFLSTTM      | -A  | DTNNQLAIQVRQ | 108 |
| 450 | IDV   | -N  | --- | DTIT     | EGAA | --- | TFEEK     | VAKLRILAGD  | V | VDKFLATTM      | -A  | DTNNQLAIQVRQ | 108 |
| 451 | YDV   | -G  | --- | DTWTE    | STP  | --- | TFEQVT    | TGLKILGGDAD | I | DHFLQQTY       | -R  | DPNQLEAVVLQQ | 108 |
| 452 | YDV   | -G  | --- | DTWEE    | ATP  | --- | EFTQVT    | VALKILGGDAD | V | DNFLQQTY       | -A  | DPNDLEAVVIES | 108 |
| 453 | IDV   | -N  | --- | DTIA     | EGAA | --- | TFTEH     | VAKLRILAGD  | V | VDKFLATTM      | -S  | DTNSQLAIQVRQ | 108 |
| 454 | AGVGS | --- | --- | TITAKAPA | ---  | --- | TFTQVTSTL | TTIIGDAE    | V | NGLIQATR       | -SG | DGNDQTAVQVAS | 111 |
| 455 | LSP   | -N  | --- | DTVN     | EDAG | --- | TFDEV     | VSKLRILAGD  | V | VDKFLQETD      | -S  | DTNDQRATQIAM | 108 |
| 456 | IDV   | -N  | --- | DTIT     | EGAA | --- | TFEEK     | VAKLRILAGD  | V | VDKFLATTM      | -A  | DTNNQLAIQVRQ | 108 |
| 457 | IDV   | -N  | --- | DTIPE    | EGAA | --- | TFEEC     | VAKLRILAGD  | V | VDKFLATTM      | -A  | DTNNQLAIQVRQ | 108 |
| 458 | IDV   | -N  | --- | DTIS     | EGAA | --- | TFTEH     | VAKLRILAGD  | V | VDKFLATTM      | -S  | DTNSQLAIQVRQ | 108 |

|     |           |            |           |            |                |           |     |     |
|-----|-----------|------------|-----------|------------|----------------|-----------|-----|-----|
| 459 | LDP-N---- | DVVPESTG-- | DFTEVVT   | TKLRILAGD  | VDVDFLAETM-S-  | DTENQLATQ | IGL | 108 |
| 460 | IDV-N---- | DTIPEGAA-- | TFEEC     | VAKLRILAGD | VDVDFLATTM-A-  | DTNNQLAIQ | VRQ | 108 |
| 461 | AGVGS---- | TITAKNPA-- | TFTQVTSTL | TTIIGDAEV  | NGLIQATR-SG    | DGNDQTAVQ | VAS | 111 |
| 462 | IDV-N---- | DTIPEGAA-- | TFEEC     | VAKLRILAGD | VDVDFLATTM-A-  | DTNNQLAIQ | VRQ | 108 |
| 463 | -----     | -----      | -----     | -----      | MASQDIF-R-     | HRNDLVDFS | VTL | 20  |
| 464 | IDV-N---- | DTIAEGAA-- | TFSEH     | VAKLRILAGD | VDVDFLATTM-S-  | DTNNQLAVQ | VRQ | 108 |
| 465 | IDV-N---- | DTIPEGAA-- | TFEEC     | VAKLRILAGD | VDVDFLATTM-A-  | DTNNQLAIQ | VRQ | 108 |
| 466 | IDV-N---- | DTIPEGAA-- | TFEEC     | VAKLRILAGD | VDVDFLATTM-A-  | DTNNQLAIQ | VRQ | 108 |
| 467 | IDV-N---- | DTITEGAA-- | TFEEK     | VAKLRILAGD | VDVDFLATTM-A-  | DTNNQLAIQ | VRQ | 108 |
| 468 | IDV-N---- | DTIPEGAA-- | TFEEC     | VAKLRILAGD | VDVDFLATTM-A-  | DTNNQLAIQ | VRQ | 108 |
| 469 | IDV-N---- | DVVPEGAA-- | TFTEH     | VAKLRILAGD | VDVDFLASTM-G-  | DTNSQLAIQ | VRQ | 108 |
| 470 | IDV-N---- | DTIPEGAA-- | TFEEC     | VAKLRILAGD | VDVDFLATTM-A-  | DTNNQLAIQ | VRQ | 108 |
| 471 | AGVDA---- | TITAKAPA-- | TFTKVTSEL | TTIIGDAEV  | NGLIQATR-SS    | DGNDQTAVQ | VAS | 111 |
| 472 | LDP-N---- | DPINESAA-- | TFEEV     | VAKLRILAGD | VDVDFLNQTM-S-  | DTNSQMATQ | IAK | 108 |
| 473 | AGVDA---- | TITAKAPA-- | TFTKVTSEL | TTIIGDAEV  | NGLIQATR-SS    | DGNDQTAVQ | VAS | 111 |
| 474 | IDV-N---- | DTIPEGAA-- | TFEEC     | VAKLRILAGD | VDVDFLATTM-A-  | DTNNQLAIQ | VRQ | 108 |
| 475 | IDV-N---- | DTITEGAA-- | TFTEH     | VAKLRILAGD | VDVDFLATTM-S-  | DTNNQLAIQ | VRQ | 108 |
| 476 | AGVGS---- | TITAKNPA-- | TFTQVTSTL | TTIIGDAEV  | NGLIQATR-SG    | DGNDQTAVQ | VAS | 111 |
| 477 | AGVGD---- | TITAKNPA-- | TFEQITSSL | TTLIGDAEV  | NGLIQATR-S-    | NINDQKTVQ | IMS | 110 |
| 478 | LGVGG---- | TITAKAPT-- | TFTQVTSAL | KRIVGDAEV  | DNFVEATH-S-    | DTTDQLAVQ | VAG | 110 |
| 479 | AGVGT---- | TITAKNPA-- | TFTHVTSTL | TTIIGDAEV  | NGLIQATR-SG    | DGNDQTAVQ | VAS | 111 |
| 480 | AGVDA---- | TITAKAPA-- | TFTKVTSEL | TTIIGDAEV  | NGLIQATR-SS    | DGNDQTAVQ | VAS | 111 |
| 481 | IDV-N---- | DTIPEGAA-- | TFEEC     | VAKLRILAGD | VDVDFLATTM-A-  | DTNNQLAIQ | VRQ | 108 |
| 482 | IDV-N---- | DTIPEGAA-- | TFEEC     | VAKLRILAGD | VDVDFLATTM-A-  | DTNNQLAIQ | VRQ | 108 |
| 483 | IDV-N---- | DVVPEGAA-- | KFTEH     | VAKLRILAGD | VDVDFLATTM-A-  | DTNSQLAIQ | IRS | 108 |
| 484 | IDV-N---- | DTIPEGAA-- | TFEEC     | VAKLRILAGD | VDVDFLATTM-A-  | DTNNQLAIQ | VRQ | 108 |
| 485 | YDV-G---- | DTWQEATP-- | EFTQVTVAL | KILGGDAD   | VDNFLQQTY-A-   | DPNDLEAIV | IES | 108 |
| 486 | IDV-N---- | DIVPEGAA-- | KFTEH     | VAKLRILAGD | VDVDFLATTM-A-  | DTNSQLAIQ | IRA | 108 |
| 487 | IDV-N---- | DTISEGAA-- | TFTEH     | VAKLRILAGD | VDVDFLATTM-S-  | DTNSQLAIQ | VRQ | 108 |
| 488 | IDV-N---- | DEVPEGAA-- | KFSEH     | VAKLRILAGD | VDVDFLASTM-G-  | DTNSQMAIQ | IRS | 108 |
| 489 | IDV-N---- | DVVPEGAA-- | KFTEH     | VAKLRILAGD | VDVDFLATTM-A-  | DTNSQLAIQ | IRA | 108 |
| 490 | AGVGS---- | TITAKNPA-- | TFTQVTSTL | TTIIGDAEV  | NGLIQATR-SG    | DGNDQTAVQ | VAS | 111 |
| 491 | IDV-N---- | DTIPEGAA-- | TFEEC     | VAKLRILAGD | VDVDFLATTM-A-  | DTNNQLAIQ | VRQ | 108 |
| 492 | LGVGS---- | SITAKAAT-- | TFTQVTSPL | KRIVGDAEV  | DNFIEATH-S-    | DTTDQLAVQ | VAG | 110 |
| 493 | IDV-N---- | DTITEGAA-- | TFEEK     | VAKLRILAGD | VDVDFLATTM-A-  | DTNNQLAIQ | VRQ | 108 |
| 494 | YDV-G---- | DTWSEATP-- | TYTQVTASL | KILGGDAD   | VDTFLQQTY-A-   | DPNDLEALV | LES | 108 |
| 495 | IDV-N---- | DTITEGAA-- | TFEEK     | VAKLRILAGD | VDVDFLATTM-A-  | DTNNQLAIQ | VRQ | 108 |
| 496 | IDV-N---- | DTITEGAA-- | TFEEK     | VAKLRILAGD | VDVDFLATTM-A-  | DTNNQLAIQ | VRQ | 108 |
| 497 | AGNDD---- | TITAKSPA-- | TFTRVSADL | TTIIGDAE   | INGLIQATR-S-   | NITDQKAVQ | IAS | 110 |
| 498 | IDV-N---- | DTIPEGAA-- | TFEEC     | VAKLRILAGD | VDVDFLATTM-A-  | DTNNQLAIQ | VRQ | 108 |
| 499 | IDV-N---- | DEVPEGAA-- | KFTEH     | VAKLRILAGD | VDVDFL SSTM-G- | DTNSQMAIQ | IRS | 108 |
| 500 | AGVGS---- | TITAKNPA-- | TFTQVTSTL | TTIIGDAEV  | NGLIQATR-SG    | DGNDQTAVQ | VAS | 111 |



|    |           |         |            |          |       |          |          |     |
|----|-----------|---------|------------|----------|-------|----------|----------|-----|
|    | 190       | 200     | 210        | 220      | 230   | 240      |          |     |
| 1  | ATRQLLYKF | FSEQLES | GTNG----   | FLGFTQL  | ----- | IQP----- | SNVTDLN- | 144 |
| 2  | ATRQLLYKF | FSEQLES | GTNG----   | FLGFTQL  | ----- | IQP----- | SNVTDLN- | 144 |
| 3  | ATRQLLYKF | FSEQLES | GTNG----   | FLGFTQL  | ----- | IQP----- | SNVTDLN- | 144 |
| 4  | ATRQLLYKF | FSEQLES | GTNG----   | FLGFTQL  | ----- | IQP----- | SNITDLN- | 144 |
| 5  | ATRQLLYKF | FSEQLES | GTNG----   | FLGFTQL  | ----- | IKP----- | SNVTDLN- | 144 |
| 6  | ATRQLLYKF | FSEQLES | GTNG----   | FLGFTQL  | ----- | IQP----- | SNVTDLN- | 144 |
| 7  | ATRQLLYKF | FSEQLES | GTNG----   | FLGFTQL  | ----- | IKP----- | SNVTNLN- | 144 |
| 8  | ATRQLLYKF | FSEQLES | GSNG----   | FLGFTQL  | ----- | IKP----- | SNVTDLN- | 144 |
| 9  | ATRQLLYKF | FSEQLES | GTNG----   | FLGFTQL  | ----- | IKP----- | SNVTNLN- | 144 |
| 10 | ATRQLLYKF | FSEQLES | GTNG----   | FLGFTQL  | ----- | VQP----- | SNITDLN- | 144 |
| 11 | ATRQLLYKF | FSEQLES | GTNG----   | FLGFTQL  | ----- | IKP----- | SNVVDLN- | 144 |
| 12 | ATRQLLYKF | FSEQLES | GTNG----   | FLGFTQL  | ----- | IKS----- | SNVTDLN- | 144 |
| 13 | ATRQLLYKF | FSEQLES | GSNG----   | FLGFKQL  | ----- | IKP----- | SNVVDVN- | 144 |
| 14 | AIRQLLYRF | FSKELQ  | NGSDG----  | FLGFKQL  | ----- | ISL----- | ENSVDLR- | 144 |
| 15 | AVRELLLYK | FWTLFES | GDSSVNPDE  | FDGLLKL  | ----- | VDP----- | SKVVDLG- | 152 |
| 16 | AVRELLLYK | FWILFER | GDASANPEE  | FDGLLSL  | ----- | VNP----- | GNTIDLQ- | 152 |
| 17 | AVRELLLYR | FWILFER | GDASTNPPEE | FDGLLSL  | ----- | VNP----- | GNTIDLQ- | 152 |
| 18 | AVRELLLYK | FWVLFES | GD TLVNPDE | FDGLLRL  | ----- | VDP----- | SNTIDLQ- | 152 |
| 19 | AIRELLLYK | FWTLFES | GD SA-NPGE | FDGLLQKL | ----- | VDP----- | SRVLDLG- | 151 |



|    |                                                          |     |
|----|----------------------------------------------------------|-----|
| 20 | AVRELLLYKFWMLFEGGDSATNPDEFDGLLKL-----VDP-----SKVVVDLE-   | 153 |
| 21 | AIRELLLYKFWTLFESGDSV-NAGEFDGLHKL-----ADP-----SRVLDLG-    | 151 |
| 22 | AIRELLLYKFWILFESGDSA-NAGEFDGLHKKI-----VDP-----SRVLDLG-   | 151 |
| 23 | AIRELLLYKFWTLFESGDSV-NAGEFDGLHKL-----ADP-----SRVLDLG-    | 152 |
| 24 | AIRELLLYKFWTLFESGDSA-NTGEFDGLYKL-----VDP-----SRVLDLG-    | 151 |
| 25 | AIRELLLYKFWMLFESGDSA-NPGEFDGLQKL-----VDP-----SRILDLG-    | 151 |
| 26 | AIRELLLYKFWTLFESGDSA-NTGEFDGLHRL-----VDS-----SRVLDLG-    | 151 |
| 27 | AVRELLLYRFWILFERGDTSTNPDEFDGLLRL-----VNP-----DNTIDLQ-    | 152 |
| 28 | AIRELLLYKFWTLFESGDSA-NTGEFDGLYKL-----VDP-----SRVLDLG-    | 151 |
| 29 | AVQRLVYRYFRQLGLGATGS--FNFPSLQDV-----VGT-----GQTIDMG-     | 151 |
| 30 | AVQRLVYRYFRQLGLGATGS--FNFPSLQDV-----VGT-----GQTIDMG-     | 157 |
| 31 | AQMRLVYRYFRRLGQAAAGT--FDFPTLQDV-----VGT-----GQTINMG-     | 153 |
| 32 | AQMRLIYRYFRRLGQAAAGT--FDFPTLQDV-----VGT-----GQTIDMG-     | 153 |
| 33 | AQMRLIYRYFRRLGQAAAGT--FDFPTLQDV-----VGT-----GQTIDMG-     | 153 |
| 34 | AIRRLMYMYFRKLDLGGTTGGN-GDFPSLADM-----AVL-----GNVVTSA-    | 159 |
| 35 | ACKRLMYMYARKLDLNNGGG-SGDFDSLADM-----CAA-----GQKVAGG-     | 170 |
| 36 | ATRQLLYKFSEQLESNGSNG----FLGFTQL-----IKP-----SNVTDLN-     | 67  |
| 37 | AIRRLTYMFYRKLDLATTGNP-GDFPSLSDM-----CAA-----GQRFNSA-     | 159 |
| 38 | AKIRLLYRYFQRLGETTGAV--TTFPGLTGM-----VGT-----GQTIAMG-     | 151 |
| 39 | ANRRLLYAFCRLLLEVGDTTANPNEFDGFLKL-----VNP-----ANVVDKA-    | 149 |
| 40 | AIRRLMYMYFRKLDLDNAGTKVGD FDSLGE L-----AT-----NITTA-      | 156 |
| 41 | AIQRLLYKFFNLLEIGNPAINPNEFAGLKKL-----VDP-----FNVVNLG-     | 149 |
| 42 | ADMRLMYRYFQRLDEVTGGI--SQFPGLQDM-----VGA-----GKTINMG-     | 151 |
| 43 | AKIRLLYGYFRRLGEATGGI--SQFPGLQDM-----VGA-----GKTINMA-     | 150 |
| 44 | ADMRLMYRYFQRLGQATGGV--SQFPGLQDI-----VGA-----GKTINMG-     | 151 |
| 45 | AKIRLLYRYFQRLGETTGAV--TTFPSLTGM-----VGA-----GQTIAMG-     | 151 |
| 46 | AKRRILYAYAQQLDSE--GS--AVGPGLPDL-----CAA-----SQLVDMG-     | 143 |
| 47 | AKRRILYAYAARLGAAT-GN--PAQGGLRDL-----ADP-----ARVINLA-     | 144 |
| 48 | AKRRILYAYAQQLDSE--GS--AVGPGLPDL-----CAA-----GQLVDMG-     | 143 |
| 49 | AKRRILYAYAQQLDSE--GS--AVGPGLPDL-----CAA-----GQLVDMG-     | 143 |
| 50 | AKRRILYAYAQQLDSE--GS--AVGPGLPDL-----CAA-----GQLVDMG-     | 143 |
| 51 | AKRQVLYAYAQWIV-----NTATGLVTL-----CDA-----SRIVDMA-        | 139 |
| 52 | AKIKLDYGYAHLDVAT-GD--PVFGGLQDI-----VAP-----GNVINVG-      | 144 |
| 53 | AVKRLYYKFWETFNTGDNANPQEFDGLRRL-----VAS-----GQTVTARD      | 154 |
| 54 | ACKRLMYMYFRKLDLDNGNTLSGDFDSLFDIANDVAPTMSVG-----ANVVDMG-  | 151 |
| 55 | AIRRMYYQFWATFNTGNEGANPQEFNGLQQ L-----VTG-----GQTIITANA   | 154 |
| 56 | AVQRLIYRYFRQLGLAATGS--FNFPSLQDV-----VGA-----GQTIDMG-     | 151 |
| 57 | ALAEILIYGYFAWLD---GT--PGTGGLRDY-----IAA-----ARIVDMG-     | 142 |
| 58 | ACTRLLLSFRKLDKVNNGGT-EGDYDSLADM-----CDA-----NQIVAGG-     | 154 |
| 59 | AIKRLYYKFWGTFTNTGNSSLNPDEFDGLRQL-----VSS-----GQTLTARD    | 154 |
| 60 | AEVQNWYGFYARMDVLT-GN--PSLGGLPDL-----VAP-----SRTLNLG-     | 144 |
| 61 | AIRRMYYQFWTTLNTGNEGTPNPQEFNGLRQL-----VVA-----GQTIITANA   | 154 |
| 62 | AKRRILYSYAAQLDSA--GV--LAAPGLPDL-----CAA-----GQLVDMG-     | 143 |
| 63 | AEIKCDYGYGYARMDTLT-GD--PVHGGLLDL-----VAP-----GNIINPG-    | 144 |
| 64 | AVKRLYYKFWETFNTGDNVNVQEFDGLRRL-----VVS-----GQTLTARD      | 154 |
| 65 | AVRRMTYQFWTAFNTGNEGTPNPQEFNGLRQL-----VVA-----GQTVTANG    | 154 |
| 66 | AKRQILYAYAEHIV-----SPTIGLPAA-----CDS-----DRNVDMG-        | 139 |
| 67 | MIRQLLYGFSERLDAAP-SP--ANPLALRNY-----IEP-----DRIVNLA-     | 144 |
| 68 | ACRQLLYGFFRLLFIGN-PVNPGEFIGFDNI-----ITGA-----AFAGQIVDAL- | 152 |
| 69 | ATRQVLYGFFRLLFVGN-PANPGEFIGFDNI-----ITGA-----PFAGQIVDAL- | 168 |
| 70 | ACRQCMYEGFRLLLESGISGND-GEFAGLRSL-----VPA-----NMTVTVG-    | 154 |
| 71 | ACRQCMYQGFRLLESGISGND-GEFAGLRSL-----VPA-----NMTVTVG-     | 205 |
| 72 | ACRQCMYQGFRLLESGISGND-GEFAGLRSL-----VPA-----NMTVTVG-     | 200 |
| 73 | ACRQCMYDGFRLLENGIAGND-GEFAGLRSL-----VPA-----NMTVTVG-     | 154 |
| 74 | KAKALGRKFKRTLATGDRSVNSKAFDGI AKL-----VAA-----GQTIISAGT   | 150 |
| 75 | AKRRILYSYAQRLGTAT-GN--PAQAGLRDL-----ADP-----ARVIDLA-     | 144 |
| 76 | AVQRLVYRYFRQLGLGATGS--FNFPSLQDV-----VGT-----GQTIDMG-     | 86  |
| 77 | GEIENWYGYGYGRMDTAT-GD--PVFGGLLDL-----VAP-----GRIVNMG-    | 144 |
| 78 | KAKAMGRKFRRTLAIIGDSGSNAKEFDGIASL-----TPA-----GQTLAAAT    | 150 |
| 79 | AVQRLIYRYFRQLGLAATGS--FNFPSLQDV-----VGA-----GQTIDMG-     | 151 |
| 80 | KAKGIARKFRRTLANGNASVNAKEFDGVHRL-----VTA-----NQTIISAGT    | 150 |
| 81 | KAKGLARKFRRTLAIIGDNGTNAKEFDGVASL-----VTG-----GQTIITAGA   | 151 |
| 82 | KAKGMARQFHRTLAMGDS SKNRKEFDGLASL-----TPA-----AQTLVAGK    | 150 |
| 83 | KAKGLGRKFKRTIVNGDS AVNAKSFDGIKKL-----TPA-----AQTLVAGA    | 150 |
| 84 | KAKGLGRKFKRTIVNGDS SVNAKSFDGIKKL-----TPA-----AQTLIAGT    | 150 |
| 85 | KAKGLGRKFKRTIVNGDS SVNAKSFDGIKKL-----TPA-----SQTLIAGT    | 150 |
| 86 | KAKGLGRKFKRTIVNGDS SVNAKSFDGIKKL-----TPS-----AQTLIAGT    | 150 |

|     |                                                          |     |
|-----|----------------------------------------------------------|-----|
| 87  | AERRLQQLFWELIDTGVAGS--GSFLGLSGL-----LPA-----GQKVVVG-     | 145 |
| 88  | ACKRLMYMYFRKLDLVNGNTLSGDFDSLFDIAGDV-----NSG-----SQIIDMS- | 102 |
| 89  | KAKALGRKFKRTIVNGDSSVNAKSFDFGVKKL-----TPA-----SQTLIAGT    | 150 |
| 90  | KSKALGRKFRRALVQGDSSVNAKEFDGIRAL-----TPA-----AQTLVAGA     | 150 |
| 91  | AKRRLLYAYATFIAD---S---NQSGSLVGI-----CDA-----ARVVNMA-     | 100 |
| 92  | AERRLQQLFWELIDTGVSGS--GSFLGLSGL-----LPA-----GQRVVVG-     | 145 |
| 93  | AERRLQQLFWELIDTGVAGS--GRFLGLAGL-----LPA-----GQRVVVG-     | 145 |
| 94  | KAKGITRKFRRLAQQGDSSVNAKEFDGIDRL-----VYN-----DQVIIVGG-    | 149 |
| 95  | KAKGLGRKFKRTIVNGDSSVNPKEFDGIAKKL-----TPA-----AQTLVAGT    | 150 |
| 96  | KAKGVAREFHRTLMLGDSATNAKEFDGLPKL-----VSG-----SQTISAGA     | 150 |
| 97  | KAKGIGRQFRRTLNVNGDSSVNRKEFDGVKKL-----VPA-----KQTLIAGK    | 150 |
| 98  | KAKGMARTFRRRAVVQGNSTDPKSFDFGIEKL-----VADT-----GNFFEAGL   | 151 |
| 99  | KAKALGRQFRRTLNVNGDSSVNRKEFDGIAKKL-----VPA-----KQTLVAGL   | 150 |
| 100 | KAKGMATTFRRRALVVGDSSTVNPKQFDGLEKL-----VTDT-----GNFIEAGV  | 151 |
| 101 | KAKGMARKFRRTLAIGDATSNPKEFNGVAKL-----VTA-----GQTIITAGT    | 151 |
| 102 | AVRNCMNGFFYLILADAAGG-TGSPPTLVSL-----CTGT-----SQMNDFN-    | 153 |
| 103 | KAKGMARTFRRRAVVQGDSTVDNKSFDGIEKL-----VKDT-----GNFFEAGV   | 151 |
| 104 | KAKGVGRKFHKTLATGDASVNPKEFDGIAKL-----VTE-----EQTISAGP     | 150 |
| 105 | KAKGVAREFHRTLARGDSKTNAKEFDGFDFKL-----VTS-----TQIVDAGA    | 150 |
| 106 | KAKGVAREFHRTLARGDSKTNAKEFDGFDFKL-----VTS-----TQIVDAGA    | 148 |
| 107 | KAKSLAMTFHKTLAQQGDASANPKAFDGLPKM-----VTP-----TQTVDVG-    | 149 |
| 108 | KAKGVAREFHRTLARGDSKTNAKEFDGFDFKL-----VTS-----TQIVDAGA    | 150 |
| 109 | KAKGVAREFHRTLARGDSKTNAKEFDGFDFKL-----VTS-----TQIVDAGA    | 150 |
| 110 | KAKGVAREFHRTLARGDSKTNAKEFDGFDFKL-----VTS-----TQIVDAGA    | 150 |
| 111 | KSKALNRLFKQTLVSGDATANPKQFDGLSKL-----VTA-----GQTMDAAP     | 150 |
| 112 | KAKGVAREFHRTLARGDSKTNAKEFDGFDFKL-----VTS-----TQIVDAGA    | 152 |
| 113 | KAKGVAREFHRTLARGDSKTNAKEFDGFDFKL-----VTS-----TQIVDAGA    | 150 |
| 114 | KAKGVAREFHRTLARGDSKTNAKEFDGFDFKL-----VTS-----TQIVDAGA    | 150 |
| 115 | KAKGLATTFRRRALIQGDSSVNPKEFDGLNKL-----VNDT-----GNYFEAGP   | 151 |
| 116 | KAKGMSRQYRAALVEGDSSTNAKQFDGLKKL-----VTT-----TQTLDAK-     | 149 |
| 117 | KAKGVGRKFHKTLATGDASVNPKEFDGIAKL-----VTE-----EQTISAGP     | 150 |
| 118 | KAKGVGRKFHKTLATGDASVNPKEFDGIAKL-----VTE-----EQTISAGP     | 150 |
| 119 | KAKGMSRQYRAALVEGDSATNAKQFDGLKKL-----VTT-----AQTLDAK-     | 149 |
| 120 | KAKSMARAFQKSVVNGDSSVNEKEFDGLKAL-----VTA-----EQTIEAGV     | 150 |
| 121 | KAKGVAREFHRTLARGDSKTNAKEFDGFDFKL-----VTS-----TQIVDAGA    | 150 |
| 122 | KAKGVAREFHRTLARGDSKTNAKEFDGFDFKL-----VTS-----TQIVDAGA    | 150 |
| 123 | KAKGVGRKFHQTLATGDATANTKAFDGLPKL-----VDA-----SQTITAGD     | 150 |
| 124 | KAKGVAREFHRTLARGDSKTNAKEFDGFDFKL-----VTS-----TQIVDAGA    | 150 |
| 125 | KAKGVAREFHRTLARGDSKTNAKEFDGFDFKL-----VTS-----TQIVDAGA    | 150 |
| 126 | KAKGVAREFHRTLARGDSKTNAKEFDGFDFKL-----VTS-----TQIVDAGA    | 150 |
| 127 | KAKALGMQFRRTLNVNGDSTKNRKEFDGVKML-----VPA-----KQTLIAGA    | 150 |
| 128 | KAKALGMQFRRTLNVNGDTTKNRKEFDGVKAL-----VPA-----KQTLIAGA    | 150 |
| 129 | KAKAVGRIFKKTIAQGNASKNPKEFDGLPQL-----VTS-----AMTLDADT     | 150 |
| 130 | KAKAVGRIFKKTIAQGNAAKNPKEFDGLPQL-----VTS-----AMTLDADT     | 150 |
| 131 | KAKAVGRIFKKTIAQGNAAKNPKEFDGLPQL-----VTS-----AMTLDADA     | 150 |
| 132 | KAKGVAREFHRTLARGDSKTNAKEFDGFDFKL-----VTS-----TQIVDAGA    | 150 |
| 133 | KTKTASRKYQDMLINGTGAGN--EFLGLLGL-----VPS-----AQKVPTGA     | 150 |
| 134 | KAKAVGRIFKKTIAQGNASKNPKEFDGLPQL-----VTS-----AMTLDADT     | 150 |
| 135 | KAKGVAREFHRTLARGDSKTNAKEFDGFDFKL-----VTS-----TQIVDAGA    | 150 |
| 136 | KAKAVGREFRKVLAEGDHDTNAKQFDGISKL-----VTT-----TQKIDAG-     | 149 |
| 137 | KAKGMARKFQRTLATGNSGTDPKSFDFGISEL-----CAD-----NQVLPTSG    | 150 |
| 138 | KAKAVAREFHRTLAKGNATANPKEFDGLPQL-----AAAA-----PNSQVQVAGA  | 153 |
| 139 | KAKALTRKLRKRTLNVGNNAVNAKEFDGLKVL-----TPA-----EQTLIAGT    | 150 |
| 140 | KVKGLARSFKRALVLGDETSNSKSFDFGLGRL-----TAS-----DQIIDAA-    | 149 |
| 141 | KAKGLRTKFQKTLINGDRSVHSKEFDGIAAI-----SNG-----LGSSQVQVGA   | 153 |
| 142 | KAKGMSLQFRSELVNGDTAVNAKSFDFGLRKL-----TPA-----GQTLGAGT    | 150 |
| 143 | KVKGLARSFKRALVLGDETSNSKSFDFGLGRL-----TAS-----EQIIDAA-    | 149 |
| 144 | KAKAINRTFRNTLVNGDSSVNAKAFDFGVKKL-----TPA-----GQTLVAGA    | 150 |
| 145 | KAKALGRALRRTIINGDNSVNAKEFDGLKKL-----MPA-----NQTLVAGN     | 150 |
| 146 | KAKGMSRKFRRTLATGNSGTDPKSFDFGIAEL-----CAD-----NQVISADG    | 150 |
| 147 | KVKGLARAFRRNLILGDSSTNSKAFDFGIPKL-----MHK-----DQKVDIA-    | 149 |
| 148 | KVKGLARAFRRNLILGDSSTNSKAFDFGIPKL-----MHN-----DQKIDIA-    | 149 |
| 149 | KVKGLARAFRRNLILGDSSTNSKAFDFGIPKL-----MHK-----DQKVDIA-    | 149 |
| 150 | KVKGLARAFRRNLILGDSSTNSKAFDFGIPKL-----MHD-----DQKIDIA-    | 149 |
| 151 | KVKGLARAFRRNLILGNSSETNTKAFDFGIPRL-----MHK-----DQKIDIA-   | 149 |
| 152 | KVKGLARAFRRNLILGDSSTNSKAFDFGIPKL-----MHD-----DQKIDIA-    | 149 |
| 153 | KAKAINRTFRNTLVNGDSSVNAKAFDFGVKKL-----TPA-----GQTLVAGA    | 150 |

|     |                    |            |                |      |     |       |                |     |
|-----|--------------------|------------|----------------|------|-----|-------|----------------|-----|
| 154 | KVKGLARAFRRNLILGDS | TTNTKAFDGI | PKL            | ---- | MID | ----- | DQKIDIA        | 149 |
| 155 | KVKGLARAFRRNLILGNS | ETNTKAFDGI | PR             | ---- | MHK | ----- | DQNIDIA        | 149 |
| 156 | KVKGLARAFRRNLILGDS | TTNSKAFDGI | PKL            | ---- | MHD | ----- | DQKIDIA        | 149 |
| 157 | KVKGLARAFRRNLILGDS | TTNSKAFDGI | PKL            | ---- | MHD | ----- | DQKIDIA        | 149 |
| 158 | KVKGLARAFRRNLILGNS | ETNTKAFDGI | PR             | ---- | MHK | ----- | DQKIDIA        | 149 |
| 159 | KVKGLARAFRRNLILGNS | ETNTKAFDGI | PR             | ---- | MHK | ----- | DQKIDIA        | 149 |
| 160 | KVKGLARAFRRNLILGNS | ETNTKAFDGI | PR             | ---- | MHK | ----- | DQNIDIA        | 149 |
| 161 | KAKGVGRKFHKTL      | ATGDASVNP  | KEFDGIAKL      | ---- | VTE | ----- | EQTISAGP       | 150 |
| 162 | KAKGLARKFKRTL      | VVGDATSSPK | EFDGLGKI       | ---- | AEA | ----- | ITAGDASRTVVAGT | 156 |
| 163 | KVKGLARAFRRNLILGNS | ETNTKAFDGI | PR             | ---- | MHK | ----- | DQKIDIA        | 149 |
| 164 | KVKGLARAFRRNLILGDS | TTNSKAFDGI | PKL            | ---- | MHD | ----- | DQKIDIA        | 149 |
| 165 | KVKGLARAFRRNLILGDS | SANSKAFDGI | PKL            | ---- | MHN | ----- | DQKIDIA        | 149 |
| 166 | KVKGLARAFRRNLILGDS | TTNSKAFDGI | PKL            | ---- | MHD | ----- | DQKIDIA        | 149 |
| 167 | KVKGLARAFRRNLILGDS | TTNSKAFDGI | PKL            | ---- | MHK | ----- | DQNV           | 149 |
| 168 | KVKGLARAFRRNLILGDS | TTNSKAFDGI | PKL            | ---- | MHN | ----- | DQKIDIA        | 149 |
| 169 | KVKGLARAFRRNLILGDS | TTNSKAFDGI | PKL            | ---- | MHK | ----- | DQNV           | 149 |
| 170 | KVKGLARAFRRNLILGDS | SSNNKAFDGI | PR             | ---- | IHA | ----- | DQKIDIA        | 149 |
| 171 | KVKGLARAFRRNLILGDS | TANSKAFDGI | PKL            | ---- | MHN | ----- | DQKIDIA        | 149 |
| 172 | KVKGLARAFRRNLILGNS | ETNTKAFDGI | PR             | ---- | MHK | ----- | DQNIDIA        | 149 |
| 173 | KVKGLARAFRRNLILGDS | SSNNKAFDGI | PR             | ---- | MHA | ----- | DQKIDIA        | 149 |
| 174 | KVKGLARAFRRNLIVGDS | SSNNKAFDGI | PR             | ---- | MHA | ----- | DQKIDIA        | 149 |
| 175 | KVKGLARAFRRNLILGDS | SSNNKAFDGI | PR             | ---- | MHA | ----- | DQKIDIA        | 149 |
| 176 | KVKGLARAFRRNLILGDS | TTNSKAFDGI | PKL            | ---- | MHK | ----- | DQKV           | 149 |
| 177 | KVKGLARAFRRNLILGNS | ETNTKAFDGI | PR             | ---- | MHK | ----- | DQKIDIA        | 149 |
| 178 | KVKGLARAFRRNLILGNS | ETNTKAFDGI | PR             | ---- | MHK | ----- | DQKIDIA        | 149 |
| 179 | KVKGLARAFRRNLILGDS | SSNNKAFDGI | PR             | ---- | MHA | ----- | DQKIDIA        | 149 |
| 180 | KVKGLARAFRRNLILGDS | TTNSKAFDGI | PKL            | ---- | MHK | ----- | DQNV           | 149 |
| 181 | KVKGLARAFRRNLIVGDS | SSNNKAFDGI | PR             | ---- | MHA | ----- | DQKIDIA        | 149 |
| 182 | KVKGLARAFRRNLILGDS | SSNNKAFDGI | PR             | ---- | MHA | ----- | DQKIDIA        | 149 |
| 183 | KVKGLARAFRRNLILGDS | SSNNKAFDGI | PR             | ---- | MHA | ----- | DQKIDIA        | 149 |
| 184 | KVKGLARAFRRNLILGDS | SSNNKAFDGI | PR             | ---- | MHA | ----- | DQKIDIA        | 149 |
| 185 | KVKGLARAFRRNLILGNS | ETNTKAFDGI | PR             | ---- | MHK | ----- | DQKIDIA        | 149 |
| 186 | KVKGLARAFRRNLIVGDS | SSNNKAFDGI | PR             | ---- | MHA | ----- | DQKIDIA        | 149 |
| 187 | KVKGLARAFRRNLILGDS | SSNNKAFDGI | PR             | ---- | MHA | ----- | DQKIDIA        | 149 |
| 188 | KVKGLARAFRRNLILGDS | SSNNKAFDGI | PR             | ---- | MHA | ----- | DQKIDIA        | 149 |
| 189 | KVKGLARAFRRNLILGDS | SSNTKAFDGI | PR             | ---- | MHA | ----- | DQKIDIA        | 149 |
| 190 | KAKAVAHKFMETFY     | YGD        | TAEDENAFDGLAKL | ---- | VDA | ----- | GQEVSMGT       | 150 |
| 191 | KVKGLARAFRRNLILGNS | ETNTKAFDGI | PR             | ---- | MHK | ----- | DQKIDIA        | 149 |
| 192 | KAKGLGIKFRRTL      | VNGDS      | SSQNKKSFDGIKTL | ---- | TPA | ----- | GQTLVAGA       | 150 |
| 193 | KVKGLARAFRRNLILGDS | SSNNKAFDGI | PR             | ---- | MHA | ----- | DQKIDIA        | 149 |
| 194 | KVKGLARAFRRNLILGDS | STNNKAFDGI | PR             | ---- | MHA | ----- | DQKIDIA        | 149 |
| 195 | KVKGLARAFRRNLILGDS | SSNNKAFDGI | PR             | ---- | MHA | ----- | DQKIDIA        | 149 |
| 196 | KVKGLARAFRRNLILGDS | ISNNKAFDGI | PR             | ---- | MHA | ----- | DQKIDIA        | 149 |
| 197 | KVKGLARAFRRNLILGDS | SSNNKAFDGI | PR             | ---- | MHA | ----- | DQKIDIA        | 149 |
| 198 | KVKGLARAFRRNLILGDS | SSNSKAFDGI | PR             | ---- | MHA | ----- | DQKIDIA        | 149 |
| 199 | KVKGLARAFRRNLILGDS | SSNNKAFDGI | PR             | ---- | MHA | ----- | DQKIDIA        | 149 |
| 200 | KVKGLARAFRRNLIVGDS | SSNNKAFDGI | PR             | ---- | MHA | ----- | DQKIDIA        | 149 |
| 201 | KVKGLARAFRRNLILGDS | SSNNKAFDGI | PR             | ---- | MHA | ----- | DQKIDIA        | 149 |
| 202 | KAKSINRVFRNAIV     | NGDS       | DVNAKSFDGIKKL  | ---- | TPA | ----- | SQTLVAGA       | 150 |
| 203 | KVKGLARAFRRNLIVGDS | SSNNKAFDGI | PR             | ---- | MHA | ----- | DQKIDIA        | 149 |
| 204 | KAKALAYAFQQT       | VATGDS     | GSNAKQFDGLAVL  | ---- | NDN | ----- | TNQVVSAGT      | 151 |
| 205 | KVKGLARAFRRNLILGDS | SSNNKAFDGI | PR             | ---- | MHA | ----- | DQKIDIA        | 149 |
| 206 | KVKGLARAFRRNLILGDS | SSNNKAFDGI | PR             | ---- | MHA | ----- | DQKIDIA        | 149 |
| 207 | KVKGLARAFRRNLILGDS | SSNNKAFDGI | PR             | ---- | MHA | ----- | DQKIDIA        | 149 |
| 208 | KVKGLARAFRRNLILGDS | SSNNKAFDGI | PR             | ---- | MHA | ----- | DQKIDIA        | 149 |
| 209 | KVKGLARAFRRNLILGDS | SSNNKAFDGI | TR             | ---- | MHA | ----- | DQKIDIA        | 149 |
| 210 | KVKGLARAFRRNLILGDS | SSNNKAFDGI | PR             | ---- | MHA | ----- | DQKIDIA        | 149 |
| 211 | KVKGLARAFRRNLILGDS | STNNKAFDGI | PR             | ---- | MHA | ----- | DQKIDIA        | 149 |
| 212 | KVKGLARAFRRNLILGDS | STNNKAFDGI | PR             | ---- | MHA | ----- | DQKIDIA        | 149 |
| 213 | KVKGLARAFRRNLILGDS | SSNNKAFDGI | PR             | ---- | MHA | ----- | DQKIDIA        | 149 |
| 214 | KVKGLARAFRRNLILGNS | ETNTKAFDGI | PR             | ---- | MHK | ----- | DQKIDIA        | 149 |
| 215 | KVKGLARAFRRNLILGDS | SSNNKAFDGI | PR             | ---- | MHA | ----- | DQKIDIA        | 149 |
| 216 | KVKGLARAFRRNLIVGDS | TTNNKAFDGI | PR             | ---- | MHA | ----- | DQKIDIA        | 149 |
| 217 | KVKGLARAFRRNLILGDS | SSNNKAFDGI | PR             | ---- | MHA | ----- | DQKIDIA        | 149 |
| 218 | KVKGLARAFRRNLILGDS | SSNNKAFDGI | PR             | ---- | MHA | ----- | DQKIDIA        | 149 |
| 219 | KVKGLARAFRRNLILGDS | SSNTKAFDGI | PR             | ---- | MHA | ----- | DQKIDIA        | 149 |
| 220 | KVKGLARAFRRNLILGDS | SSNSKAFDGI | PR             | ---- | MHT | ----- | DQKIDIA        | 149 |

|     |                    |             |            |            |       |       |         |         |         |     |     |
|-----|--------------------|-------------|------------|------------|-------|-------|---------|---------|---------|-----|-----|
| 221 | KVKGLARAFRRNLILGDS | SSNNKAFDGI  | PRL        | -----      | MHA   | ----- | DQKIDIA | 149     |         |     |     |
| 222 | KVKGLARAFRRNLILGDS | SSNNKAFDGI  | PRL        | -----      | MHE   | ----- | DQKIDIA | 149     |         |     |     |
| 223 | KVKGLARAFRRNLILGDS | SSNNKAFDGI  | PRL        | -----      | MHA   | ----- | DQKIDIA | 149     |         |     |     |
| 224 | KVKGLARAFRRNLIVGDS | TTNNKAFDGI  | PRL        | -----      | MHA   | ----- | DQKIDIA | 149     |         |     |     |
| 225 | KVKGLARAFRRNLILGDS | SSNNKAFDGI  | PRL        | -----      | MHA   | ----- | DQKIDIA | 149     |         |     |     |
| 226 | KVKGLARAFRRNLILGDS | SSNNKAFDGI  | PRL        | -----      | MHA   | ----- | DQKIDIA | 149     |         |     |     |
| 227 | KVKGLARAFRRNLILGDS | NTNNKAFDGI  | PRL        | -----      | MHA   | ----- | DQKIDIA | 149     |         |     |     |
| 228 | KAKGMGREFSKVLIQ    | GDS         | AVNAKQFDG  | VAKL       | ----- | VTS   | -----   | DQTI    | DGK     | 149 |     |
| 229 | KVKGLARAFRRNLILGDS | STNNKAFDGI  | PRL        | -----      | MHA   | ----- | DQKIDIA | 149     |         |     |     |
| 230 | KAKGMGREFSKVLIQ    | GDS         | AVNAKQFDG  | VAKL       | ----- | VTS   | -----   | DQTI    | DGK     | 149 |     |
| 231 | KVKGLARAFRRNLILGDS | SSNNKAFDGI  | PRL        | -----      | MHA   | ----- | DQKIDIA | 149     |         |     |     |
| 232 | KVKGLARAFRRNLILGN  | SETNTKAFDGI | PRL        | -----      | MHK   | ----- | DQKIDIA | 149     |         |     |     |
| 233 | KVKGLARAFRRNLILGDS | SSNTKAFDGI  | PRL        | -----      | MHT   | ----- | DQKIDIA | 149     |         |     |     |
| 234 | KVKGLARAFRRNLILGDS | SSNNKAFDGI  | PRL        | -----      | MHA   | ----- | DQKIDIA | 149     |         |     |     |
| 235 | KVKGLARAFRRNLIVGDS | TTNNKAFDGI  | PRL        | -----      | MHA   | ----- | DQKIDIA | 149     |         |     |     |
| 236 | KVKGLARAFRRNLILGDS | SSNTKAFDGI  | PRL        | -----      | MHA   | ----- | DQKIDIA | 149     |         |     |     |
| 237 | KVKGLARAFRRNLILGDS | SSNNKAFDGI  | PRL        | -----      | MHA   | ----- | DQKIDIA | 149     |         |     |     |
| 238 | KVKGLARAFRRNLIVGDS | SSNNKAFDGI  | PRL        | -----      | MHA   | ----- | DQKIDIA | 149     |         |     |     |
| 239 | KAKAVAHAFLLQAFYR   | GN          | SVVNP      | KQFDGLRKL  | ----- | VPA   | -----   | SQTI    | QPGP    | 150 |     |
| 240 | KVKGLARAFRRNLILGN  | SETNTKAFDGI | PRL        | -----      | MHK   | ----- | DQKIDIA | 149     |         |     |     |
| 241 | KVKGLARAFRRNLILGDS | STNTKAFDGI  | PKL        | -----      | MHD   | ----- | DQKIDIE | 149     |         |     |     |
| 242 | KVKGLARAFRRNLILGDS | STNNKAFDGI  | PRL        | -----      | MHA   | ----- | DQKIDIA | 149     |         |     |     |
| 243 | KVKGLARAFRRNLIVGDS | SSNNKAFDGI  | PRL        | -----      | MHA   | ----- | DQKIDIA | 149     |         |     |     |
| 244 | KVKGLARAFRRNLILGDS | SSNNKAFDGI  | PRL        | -----      | MHA   | ----- | DQKIDIA | 149     |         |     |     |
| 245 | KVKGLARAFRRNLILGDS | STNNKAFDGI  | PRL        | -----      | MHA   | ----- | DQKIDIA | 149     |         |     |     |
| 246 | KVKGLARAFRRNLILGDS | SSNNKAFDGI  | PRL        | -----      | MHA   | ----- | DQKIDIA | 149     |         |     |     |
| 247 | KVKGLARAFRRNLILGDS | SSNTKAFDGI  | PRL        | -----      | MHA   | ----- | DQKIDIA | 149     |         |     |     |
| 248 | KVKGLARAFRRNLILGDS | SSNNKAFDGI  | PRL        | -----      | MHA   | ----- | DQKIDIA | 149     |         |     |     |
| 249 | KVKGLARAFRRNLILGDS | SSNNKAFDGI  | PRL        | -----      | MHA   | ----- | DQKIDIA | 149     |         |     |     |
| 250 | KVKGLARAFRRNLILGDS | SSNNKAFDGI  | PRL        | -----      | MHA   | ----- | DQKIDIA | 149     |         |     |     |
| 251 | KVKGLARAFRRNLILGDS | SSNSKAFDGI  | PRL        | -----      | MHE   | ----- | DQKIDIA | 149     |         |     |     |
| 252 | KVKGLARAFRRNLILGDS | SSNNKAFDGI  | PRL        | -----      | MHA   | ----- | DQKIDIA | 149     |         |     |     |
| 253 | KVKGLARAFRRNLILGDS | SSNNKAFDGI  | PRL        | -----      | MHA   | ----- | DQKIDIA | 149     |         |     |     |
| 254 | KVKGLARAFRRNLILGDS | SSNNKAFDGI  | PRL        | -----      | MHA   | ----- | DQKIDIA | 149     |         |     |     |
| 255 | KVKGLARAFRRNLILGDS | SSNNKAFDGI  | PRL        | -----      | MHA   | ----- | DQKIDIA | 149     |         |     |     |
| 256 | KVKGLARAFRRNLILGN  | S           | STNTKAFDGI | PKL        | ----- | MHD   | -----   | DQKIDIE | 149     |     |     |
| 257 | KVKGLARAFRRNLILGDS | STNTKAFDGI  | PKL        | -----      | MHD   | ----- | DQKIDIE | 149     |         |     |     |
| 258 | KVKGLARAFRRNLILGDS | SSNNKAFDGI  | PRL        | -----      | MHA   | ----- | DQKIDIA | 149     |         |     |     |
| 259 | KVKGLARAFRRNLILGDS | STNNKAFDGI  | PRL        | -----      | MHA   | ----- | DQKIDIA | 149     |         |     |     |
| 260 | KVKGLARAFRRNLIVGDS | TTNNKAFDGI  | PKL        | -----      | MHD   | ----- | DQKIDIA | 149     |         |     |     |
| 261 | KVKGLARAFRRNLIVGDS | STNNKAFDGI  | PKL        | -----      | MHD   | ----- | DQKIDIS | 149     |         |     |     |
| 262 | KVKGLARAFRRNLILGDS | SSNNKAFDGI  | PRL        | -----      | MHA   | ----- | DQKIDIA | 149     |         |     |     |
| 263 | KVKGLARAFRRNLILGN  | S           | TENTKAFDGI | PKL        | ----- | MHD   | -----   | DQKIDIA | 149     |     |     |
| 264 | KVKGLARAFRRNLILGDS | STNNKAFDGI  | PKL        | -----      | MHD   | ----- | DQKIDIA | 149     |         |     |     |
| 265 | KVKGLARAFRRNLIVGDS | ITNNKAFDGI  | PKL        | -----      | MHD   | ----- | DQKIDIS | 149     |         |     |     |
| 266 | KVKGLARAFRRNLILGDS | STNNKAFDGI  | PRL        | -----      | MHA   | ----- | DQKIDIA | 149     |         |     |     |
| 267 | KVKGLARAFRRNLIVGDS | TTNNKAFDGI  | PKL        | -----      | MHD   | ----- | DQKIDIS | 149     |         |     |     |
| 268 | KVKGLARAFRRNLIVGDS | TTNNKAFDGI  | PKL        | -----      | MHD   | ----- | DQKIDIS | 149     |         |     |     |
| 269 | KVKGLARAFRRNLILGDS | STNTKAFDGI  | PKL        | -----      | MHD   | ----- | DQKIDIE | 149     |         |     |     |
| 270 | KAKGMGREFSKVLIQ    | GN          | S          | TTNAKQFDGI | AKL   | ----- | VTS     | -----   | DQTI    | DGK | 149 |
| 271 | KVKGLARAFRRNLILGDS | STNNKAFDGI  | PRL        | -----      | MHA   | ----- | DQKIDIA | 149     |         |     |     |
| 272 | KVKGLARAFRRNLIVGDS | TTNNKAFDGI  | PKL        | -----      | MHD   | ----- | DQKIDIS | 149     |         |     |     |
| 273 | KVKGLARAFRRNLIVGDS | TTNSKAFDGI  | PKL        | -----      | MHD   | ----- | DQKIDIS | 149     |         |     |     |
| 274 | KVKGLARAFRRNLIVGDS | TTNNKAFDGI  | PKL        | -----      | MHD   | ----- | DQMIDIS | 149     |         |     |     |
| 275 | KVKGLARAFRRNLILGDS | SSNSKAFDGI  | PRL        | -----      | MHT   | ----- | DQKIDIA | 149     |         |     |     |
| 276 | KVKGLARAFRRNLIVGDS | TTNNKAFDGI  | PRL        | -----      | MHA   | ----- | DQKIDIA | 149     |         |     |     |
| 277 | KVKGLARAFRRNLILGDS | SSNTKAFDGI  | PRL        | -----      | MHA   | ----- | DQKIDIA | 149     |         |     |     |
| 278 | KVKGLARAFRRNLIVGDS | TTNNKAFDGI  | PKL        | -----      | MHD   | ----- | DQKIDIS | 149     |         |     |     |
| 279 | KVKGLARAFRRNLILGDS | SSNNKAFDGI  | PRL        | -----      | MHA   | ----- | DQKIDIA | 149     |         |     |     |
| 280 | KVKGLARAFRRNLIVGDS | TTDNKAFDGI  | PRL        | -----      | MHA   | ----- | DQKIDIA | 149     |         |     |     |
| 281 | KAKGVAREFHRTLARG   | DS          | KTNAKEFDG  | FDKL       | ----- | VTS   | -----   | TQIV    | DAGA    | 150 |     |
| 282 | KVKGLARAFRRNLIVGDS | TTNNKAFDGI  | PKL        | -----      | MHD   | ----- | DQKIDIS | 149     |         |     |     |
| 283 | KVKGLARAFRRNLILGDF | S           | TTNNKAFDGI | PRL        | ----- | MHA   | -----   | DQKIDIA | 149     |     |     |
| 284 | KVKGLARAFRRNLILGDS | SSNNKAFDGI  | PRL        | -----      | MHA   | ----- | DQKIDIA | 149     |         |     |     |
| 285 | KVKGLARAFRRNLILGDS | STNNKAFDGI  | PRL        | -----      | MHA   | ----- | DQKIDIA | 149     |         |     |     |
| 286 | KVKGLARAFRRNLILGDS | STNNK       | S          | FDGI       | PKL   | ----- | MHD     | -----   | DQKIDIE | 149 |     |
| 287 | KVKGLARAFRRNLILGDS | SSNNKAFDGI  | PRL        | -----      | MHA   | ----- | DQKIDIA | 149     |         |     |     |



|     |                |          |        |         |          |      |        |       |       |       |       |       |   |     |     |     |
|-----|----------------|----------|--------|---------|----------|------|--------|-------|-------|-------|-------|-------|---|-----|-----|-----|
| 288 | KVKGLARAFRRNLI | LGDS     | STNN   | KAFD    | GIP      | KL   | -----  | MHD   | ----- | DQKID | I     | E     | - | 149 |     |     |
| 289 | KVKGLARAFRRNLI | V        | LGDS   | STNN    | KAFD     | GIP  | KL     | ----- | MHD   | ----- | DQKID | I     | S | -   | 149 |     |
| 290 | KVKGLARAFRRNLI | LGDS     | SSNT   | KAFD    | GIP      | RL   | -----  | MHT   | ----- | DQKID | I     | A     | - | 149 |     |     |
| 291 | KVKGLARAFRRNLI | LGDS     | STNN   | KAFD    | GIP      | RL   | -----  | MHA   | ----- | DQKID | I     | A     | - | 149 |     |     |
| 292 | KVKGLARAFRRNLI | LGDS     | SSNN   | KAFD    | GIP      | RL   | -----  | MHA   | ----- | DQKID | I     | A     | - | 149 |     |     |
| 293 | KVKGLARAFRRNLI | V        | LGDS   | TTNN    | KAFD     | GIP  | KL     | ----- | MHD   | ----- | DQKID | I     | S | -   | 149 |     |
| 294 | KVKGLARAFRRNLI | V        | LGDS   | SSNN    | KAFD     | GIP  | RL     | ----- | MHE   | ----- | DQKID | I     | A | -   | 149 |     |
| 295 | KVKGLARAFRRNLI | V        | LGDS   | TTNN    | KAFD     | GIP  | KL     | ----- | MHD   | ----- | DQKID | I     | S | -   | 149 |     |
| 296 | KVKGLARAFRRNLI | V        | LGDS   | TTNS    | KAFD     | GIP  | KL     | ----- | MHD   | ----- | DQKID | I     | S | -   | 149 |     |
| 297 | KVKGLARAFRRNLI | V        | LGDS   | TTNN    | KAFD     | GIP  | KL     | ----- | MHD   | ----- | DQKID | I     | S | -   | 149 |     |
| 298 | KVKGLARAFRRNLI | LGDS     | SSNN   | KAFD    | GIP      | RL   | -----  | MHE   | ----- | DQKID | I     | A     | - | 149 |     |     |
| 299 | KVKGLARAFRRNLI | V        | LGDS   | TTNN    | KAFD     | GIP  | KL     | ----- | MHD   | ----- | DQKID | I     | S | -   | 149 |     |
| 300 | KVKGLARAFRRNLI | LGDS     | SSNN   | KAFD    | GIP      | RL   | -----  | MHA   | ----- | DQKID | I     | A     | - | 143 |     |     |
| 301 | KVKGLARAFRRNLI | V        | LGDS   | TTNN    | KAFD     | GIP  | KL     | ----- | MHD   | ----- | DQKID | I     | S | -   | 149 |     |
| 302 | KVKGLARAFRRNLI | V        | LGDS   | ITNN    | KAFD     | GIP  | KL     | ----- | MHD   | ----- | DQKID | I     | S | -   | 149 |     |
| 303 | KVKGLARAFRRNLI | LGDS     | STNT   | KAFD    | GIP      | KL   | -----  | MHD   | ----- | DQKID | I     | E     | - | 149 |     |     |
| 304 | KVKGLARAFRRNLI | V        | LGDS   | TTNN    | KAFD     | GIP  | KL     | ----- | MHD   | ----- | DQKID | I     | S | -   | 149 |     |
| 305 | KVKGLARAFRRNLI | V        | LGDS   | TTNN    | KAFD     | GIP  | KL     | ----- | MHD   | ----- | DQKID | I     | S | -   | 149 |     |
| 306 | KVKGLARAFRRNLI | V        | LGDS   | TTNN    | KAFD     | GIP  | KL     | ----- | MHD   | ----- | DQKID | I     | S | -   | 149 |     |
| 307 | KVKGLARAFRRNLI | LGDS     | STNN   | KAFD    | GIP      | KL   | -----  | MHD   | ----- | DQKID | I     | E     | - | 149 |     |     |
| 308 | KVKGLARAFRRNLI | V        | LGDS   | TTNN    | KAFD     | GIP  | KL     | ----- | MHD   | ----- | DQKID | I     | S | -   | 149 |     |
| 309 | KVKGLARAFRRNLI | LGDS     | STNT   | KAFD    | GIP      | KL   | -----  | MHD   | ----- | DQKID | I     | E     | - | 149 |     |     |
| 310 | KVKGLARAFRRNLI | LGDS     | STNN   | KAFD    | GIP      | KL   | -----  | MHD   | ----- | DQKID | I     | E     | - | 149 |     |     |
| 311 | KVKGLARAFRRNLI | LGDS     | STNT   | KAFD    | GIP      | KL   | -----  | MHD   | ----- | DQKID | I     | E     | - | 149 |     |     |
| 312 | KVKGLARAFRRNLI | V        | LGDS   | TTNN    | KAFD     | GIP  | KL     | ----- | MHD   | ----- | DQKID | I     | S | -   | 149 |     |
| 313 | KVKGLARAFRRNLI | LGDS     | SSNN   | KAFD    | GIP      | RL   | -----  | MHA   | ----- | DQKID | I     | A     | - | 149 |     |     |
| 314 | KVKGLARAFRRNLI | LGDS     | STNT   | KAFD    | GIP      | KL   | -----  | MHD   | ----- | DQKID | I     | E     | - | 149 |     |     |
| 315 | KVKGLARAFRRNLI | LGDS     | SSNN   | KAFD    | GIP      | RL   | -----  | MHT   | ----- | DQKID | I     | A     | - | 149 |     |     |
| 316 | KVKGLARAFRRNLI | V        | LGDS   | TANN    | KAFD     | GIP  | KL     | ----- | MHD   | ----- | DQKID | I     | S | -   | 149 |     |
| 317 | KVKGLARAFRRNLI | LGDS     | STNN   | KAFD    | GIP      | KL   | -----  | MHD   | ----- | DQKID | I     | A     | - | 149 |     |     |
| 318 | KVKGLARAFRRNLI | V        | LGDS   | ASTNN   | KAFD     | GIP  | KL     | ----- | MHD   | ----- | DQKID | I     | S | -   | 149 |     |
| 319 | KVKGLARAFRRNLI | V        | LGDS   | TTNN    | KAFD     | GIP  | KL     | ----- | MHD   | ----- | DQKID | I     | S | -   | 149 |     |
| 320 | KVKGLARAF      | C        | RNLI   | LGDS    | TTNT     | KAFD | GIP    | KL    | ----- | MHD   | ----- | DQKID | I | E   | -   | 149 |
| 321 | KVKGLARAFRRNLI | V        | LGDS   | TTNN    | KAFD     | GIP  | KL     | ----- | MHD   | ----- | DQKID | I     | S | -   | 149 |     |
| 322 | KVKGLARAFRRNLI | LGDS     | STNT   | KAFD    | GIP      | KL   | -----  | MHD   | ----- | DQKID | I     | E     | - | 149 |     |     |
| 323 | KVKGLARAFRRNLI | LGDS     | STNN   | KAFD    | GIP      | KL   | -----  | MHD   | ----- | DQKID | I     | E     | - | 149 |     |     |
| 324 | KVKGLARAFRRNLI | LGDS     | SSNN   | KAFD    | GIP      | RL   | -----  | MHA   | ----- | DQKID | I     | A     | - | 149 |     |     |
| 325 | KVKGLARAFRRNLI | LD       | DS     | STNN    | KAFD     | GIP  | RL     | ----- | MHA   | ----- | DQKID | I     | A | -   | 149 |     |
| 326 | KVKGLARAFRRNLI | V        | LGDS   | TTNN    | KAFD     | GIP  | KL     | ----- | MHD   | ----- | N     | QKID  | I | S   | -   | 149 |
| 327 | KVKGLARAFRRNLI | V        | LGDS   | TTNN    | KAFD     | GIP  | KL     | ----- | MHD   | ----- | DQKID | I     | S | -   | 149 |     |
| 328 | KVKGLARAFRRNLI | V        | LGDS   | TTNN    | KAFD     | GIP  | KL     | ----- | MHD   | ----- | DQKID | I     | S | -   | 149 |     |
| 329 | KVKGLARAFRRNLI | LGDS     | STNN   | KAFD    | GIP      | KL   | -----  | MHD   | ----- | DQKID | I     | E     | - | 149 |     |     |
| 330 | KVKGLARAFRRNLI | LGDS     | STNT   | KAFD    | GIP      | KL   | -----  | MHD   | ----- | DQKID | I     | E     | - | 149 |     |     |
| 331 | KVKGLARAFRRNLI | V        | LGDS   | TTNN    | KAFD     | GIP  | KL     | ----- | MHD   | ----- | DQKID | I     | S | -   | 149 |     |
| 332 | KVKGLARAFRRNLI | LGDS     | STNT   | KAFD    | GIP      | KL   | -----  | MHD   | ----- | DQKID | I     | E     | - | 149 |     |     |
| 333 | KVKGLARAFRRNLI | LGDS     | STD    | T       | KAFD     | GIP  | KL     | ----- | MHD   | ----- | DQKID | I     | E | -   | 149 |     |
| 334 | KVKGLARAFRRNLI | LG       | N      | STENT   | KAFD     | GIP  | KL     | ----- | MHN   | ----- | DQKID | I     | A | -   | 149 |     |
| 335 | KVKGLARAFRRNLI | LGDS     | STNN   | KAFD    | GIP      | KL   | -----  | MHD   | ----- | DQKID | I     | E     | - | 149 |     |     |
| 336 | KVKGLARAFRRNLI | V        | LGDS   | TTNN    | KAFD     | GIP  | RL     | ----- | MHA   | ----- | DQKID | I     | A | -   | 149 |     |
| 337 | KVKGLARAFRRNLI | LGDS     | STNN   | KAFD    | GIP      | KL   | -----  | MHD   | ----- | DQKID | I     | E     | - | 149 |     |     |
| 338 | KVKGLARAFRRNLI | V        | LGDS   | TTNN    | KAFD     | GIP  | RL     | ----- | MHD   | ----- | DQKID | I     | S | -   | 149 |     |
| 339 | KVKGLARAFRRNLI | LGDS     | STNT   | KAFD    | GIP      | KL   | -----  | MHD   | ----- | DQKID | I     | E     | - | 149 |     |     |
| 340 | KVKGLARAFRRNLI | V        | LGDS   | TTNN    | KAFD     | GIP  | KL     | ----- | MHD   | ----- | DQKID | I     | S | -   | 149 |     |
| 341 | KVKGLARAFRRNLI | LGDS     | STNT   | KAFD    | GIP      | KL   | -----  | MHD   | ----- | DQKID | I     | E     | - | 149 |     |     |
| 342 | KVKGLARAFRRNLI | LG       | N      | SETNT   | KAFD     | GIP  | RL     | ----- | MHK   | ----- | DQ    | N     | I | A   | -   | 149 |
| 343 | KVKGLARAFRRNLI | LGDS     | TTNT   | KAFD    | GIP      | KL   | -----  | MHD   | ----- | DQKID | I     | E     | - | 149 |     |     |
| 344 | KVKGLARAFRRNLI | LGDS     | STNN   | KAFD    | GIP      | KL   | -----  | MHD   | ----- | DQKID | I     | E     | - | 149 |     |     |
| 345 | KVKGLARAFRRNLI | V        | LGDS   | TTNN    | KAFD     | GIP  | KL     | ----- | MHD   | ----- | DQKID | I     | S | -   | 149 |     |
| 346 | KVKGLARAFRRNLI | V        | LGDS   | TTNN    | KAFD     | GIP  | KL     | ----- | MHD   | ----- | DQKID | I     | S | -   | 149 |     |
| 347 | KVKGLARAFRRNLI | LGDS     | SSNN   | KAFD    | GIP      | RL   | -----  | MHA   | ----- | DQKID | I     | A     | - | 149 |     |     |
| 348 | KVKGLARAFRRNLI | LG       | N      | STENT   | KAFD     | GIP  | KL     | ----- | MHN   | ----- | DQKID | I     | A | -   | 149 |     |
| 349 | KVKGLARAFRRNLI | LGDS     | STNT   | KAFD    | GIP      | KL   | -----  | MHD   | ----- | DQKID | I     | E     | - | 149 |     |     |
| 350 | KVKGLARAFRRNLI | LGDS     | STNN   | KAFD    | GIP      | KL   | -----  | MHD   | ----- | DQKID | I     | E     | - | 149 |     |     |
| 351 | KAKG           | VAREFHRT | LARGDS | KTNAKE  | FDGFDKL  |      |        | VTS   | ----- | TQIV  | DAGA  |       |   | 131 |     |     |
| 352 | KVKGLARAFRRNLI | LG       | N      | STENN   | KAFD     | GIP  | KL     | ----- | MHD   | ----- | DQKID | I     | E | -   | 149 |     |
| 353 | KA             | KS       | VG     | RQYQDTM | INGDGTSE | -TF  | QGLLSL | VAA   | ----- | GQTIT | GTDT  |       |   | 150 |     |     |
| 354 | KVKGLARAFRRNLI | V        | LGDS   | TTNN    | KAFD     | GIP  | KL     | ----- | MHD   | ----- | DQKID | I     | S | -   | 146 |     |

|     |                     |                  |                |     |           |     |
|-----|---------------------|------------------|----------------|-----|-----------|-----|
| 355 | KVKGLARAFRRNLILGNS  | TENTKAFDGI       | PKL            | MHN | DQKIDIA   | 149 |
| 356 | KVKGLARAFRRNLILGDS  | STNTKAFDGI       | PKL            | MHD | DQKIDIE   | 149 |
| 357 | KVKGLARAFRRNLIVGDS  | TTNNKAFDGI       | PKL            | MHD | DQKIDIS   | 149 |
| 358 | KVKGLARAFRRNLILGDS  | STNTKAFDGI       | PKL            | MHD | DQKIDIE   | 149 |
| 359 | KVKGLARAFRRNLIVGDS  | TTNNKAFDGI       | PKL            | MHD | DQKIDIS   | 149 |
| 360 | KVKGLARAFRRNLILGDS  | STNTKAFDGI       | PKL            | MHD | DQKIDIE   | 149 |
| 361 | KVKGLARAFRRNLILGDS  | SSNNKAFDGI       | PRL            | MHA | DQKIDIA   | 149 |
| 362 | KVKGLARAFRRNLIVGDS  | TTNNKAFDGI       | PKL            | MHD | DQKIDIS   | 149 |
| 363 | KVKGLARAFRRNLILGDS  | STNTKAFDGI       | PKL            | MHD | DQKIDIE   | 149 |
| 364 | KVKGLARAFRRNLILGDS  | STNTKAFDGI       | PKL            | MHD | DQKIDIE   | 149 |
| 365 | KVKGLARAFRRNLILGDS  | STNTKAFDGI       | PKL            | MHD | DQKIDIE   | 149 |
| 366 | KVKGLARAFRRNLILGDS  | STNTKAFDGI       | PKL            | MHD | DQKIDIE   | 149 |
| 367 | KVKGLARAFRRNLILGNS  | TENTKAFDGI       | PKL            | MHD | DQKIDIA   | 149 |
| 368 | KVKGLARAFRRNIIILGNS | TENTKAFDGI       | PKL            | MHN | DQKIDIA   | 149 |
| 369 | KVKGLARAFRRNLILGDS  | STNTKAFDGI       | PKL            | MHD | DQKIDIE   | 149 |
| 370 | KVKGLARAFRRNLILGDS  | STNTKAFDGI       | PKL            | MHD | DQKIDIE   | 149 |
| 371 | KVKGLARAFRRNLILGDS  | STNTKAFDGI       | PKL            | MHD | DQKIDIE   | 149 |
| 372 | KVKGLARAFRRNLILGDS  | STNNKAFDGI       | PKL            | MHD | DQKIDIE   | 149 |
| 373 | KVKGLARAFRRNLILGDS  | TTNTKAFDGI       | PKL            | MHD | DQKIDIE   | 149 |
| 374 | KVKGLARAFRRNLILGDS  | SSNSKAFDGI       | PRL            | MHE | DQKIDIA   | 149 |
| 375 | KVKGLARAFRRNLILGDS  | STNTKAFDGI       | PKL            | MHD | DQKIDIE   | 149 |
| 376 | KVKGLARAFRRNLIVGDS  | TTNNKAFDGI       | PRL            | MHA | DQKIDIA   | 149 |
| 377 | KAKAVAHAF           | LATFYTG          | ASADPKQFDGLRR  | VPA | SQTIQPGP  | 150 |
| 378 | KVKGLARAFRRNLILGDS  | STNNKAFDGI       | PKL            | MHD | DQKIDIE   | 149 |
| 379 | KVKGLARAFRRNLILGDS  | STNTKAFDGI       | PKL            | MHD | DQKIDIE   | 149 |
| 380 | KVKGLARAFRRNLILGNS  | TENTKAFDGI       | PKL            | MNN | DQKIDIA   | 149 |
| 381 | KVKGLARAFRRNLILGNS  | TENTKAFDGI       | PKL            | MHN | DQKIDIA   | 149 |
| 382 | KAKSAGRNYQNQL       | INGSGASD         | EFNGLINL       | CAS | GQKATTGG  | 150 |
| 383 | KVKGLARAFRRNIIILGNS | TENTKAFDGI       | PKL            | MHN | DQKIDIA   | 149 |
| 384 | KVKGLARAFRRNLILGNS  | TENTKAFDGI       | PKL            | MHN | DQKIDIA   | 149 |
| 385 | KVKGLARAFRRNLILGDS  | STNTKAFDGI       | PKL            | MHD | NQKIDIE   | 149 |
| 386 | KVKGLARAFRRNLIVGDS  | TTNNKAFDGI       | PRL            | MHA | DQKIDIA   | 149 |
| 387 | KAKGMGRFRRTLV       | QGD              | SAANSKEFDGLWKL | VTA | QQSIAAGA  | 151 |
| 388 | KVKGLARAFRRNLILGNS  | TENTKAFDGI       | PKL            | MHN | DQKIDIA   | 149 |
| 389 | KVKGLARAFRRNLIVGDS  | TTNNKAFDGI       | PKL            | MHD | DQKIDIS   | 149 |
| 390 | KTKTASRKYQDM        | LINGTGAGD        | EFLGLLGL       | VPV | AQKVATGA  | 150 |
| 391 | KVKGLARAFRRNLILGNS  | TENTKAFDGI       | PKL            | MHN | DQKIDIA   | 149 |
| 392 | KVKGLARAFRRNLILGDS  | STNTKAFDGI       | PKL            | MHD | DQKIDIE   | 149 |
| 393 | KVKGLARAFRRNLILGDS  | STNTKAFDGI       | PKL            | MHD | DQKIDIE   | 149 |
| 394 | KVKGLARAFRRNLILGNS  | TENTKAFDGI       | PKL            | MHN | DQKIDIA   | 149 |
| 395 | KVKGLARAFRRNLILGNS  | TENTKAFDGI       | PKL            | MHN | DQKIDIA   | 149 |
| 396 | KVKGMARAFRRNLILGNS  | ETNNKAFDGI       | PRL            | MHE | DQKIDIA   | 149 |
| 397 | KAKSCGRKYQDQMV      | NGDGTGN          | NMTGMFGL       | VAA | GQTIITANN | 151 |
| 398 | KVKGLARAFRRNLILGDS  | SSNNKAFDGI       | PRL            | MHA | DQKIDIA   | 149 |
| 399 | KVKGLARAFRRNLILGDS  | STNNKAFEGIP      | PKL            | MHD | DQKIDIA   | 149 |
| 400 | KVKGLARAFRRNLILGNS  | TANNKAFDGI       | PKL            | MHN | DQKIDIA   | 149 |
| 401 | KVKGLARAFRRNLILGNS  | TANNKAFDGI       | PKL            | MHN | DQKIDIA   | 149 |
| 402 | KVKGLARAFRRNLILGNS  | TENTKAFDGI       | PKL            | MRN | DQKIDIA   | 149 |
| 403 | KVKGLARAFRRNLIVGDS  | TTNNKAFDGI       | PKL            | MHD | DQKIDIS   | 149 |
| 404 | KVKGLARAFRRNLIVGDS  | TTNNKAFDGI       | PKL            | MHD | DQKIDIS   | 149 |
| 405 | KVKGLARAFRRNLILGDS  | SSNNKAFDGI       | PRL            | MHA | DQKIDIA   | 149 |
| 406 | KVKGLARAFRRNLILGNS  | TANTKAFDGI       | PKL            | MHN | DQKIDIA   | 149 |
| 407 | KVKGLARAFRRNLIVGDS  | TTNNKAFDGI       | PKL            | MHD | DQKIDIS   | 149 |
| 408 | KVKGLARAFRRNLILGDS  | STNTKAFDGI       | PKL            | MHD | DQKIDIE   | 149 |
| 409 | KVKGLARAFRRNLILGNS  | TANNKAFDGI       | PKL            | MHN | DQKIDIA   | 149 |
| 410 | KVKGLARAFRRNLILGNS  | TANTKAFDGI       | PKL            | MHN | DQKIDIA   | 149 |
| 411 | KVKGLARAFRRNLILGNS  | TANTKAFDGI       | PKL            | MHN | DQKIDIA   | 149 |
| 412 | KVKGLARAFRRNLILGNS  | TANNKAFDGI       | PKL            | MHN | DQKIDIA   | 149 |
| 413 | KVKGLARAFRRNLILGDS  | SSNNKAFDGI       | PRL            | MHA | DQKIDIA   | 149 |
| 414 | KVKGLARAFRRNIIILGNS | TENTKAFDGI       | PKL            | MHN | DQKIDIA   | 149 |
| 415 | KVKGLARAFRRNLILGNS  | TANTKAFDGI       | PKL            | MHN | DQKIDIA   | 149 |
| 416 | KVKGLARAFRRNLILGNS  | TANTKAFDGI       | PKL            | MHN | DQKIDIA   | 149 |
| 417 | KVKGMARAFRRNLILGNS  | ETNNKAFDGI       | PRL            | MHE | DQKIDIA   | 149 |
| 418 | KVKGLARAFRRNLILGDS  | STNNKAFDGI       | PKL            | MHD | DQKIDIE   | 149 |
| 419 | KAKGLGRKFRMNL       | VTGDTSVNSKQFDGVR | KL             | VTA | DQTLDAGV  | 150 |
| 420 | KVKGLARAFRRNIIILGNS | TENTKAFDGI       | PKL            | MHN | DQKIDIA   | 149 |
| 421 | KVKGLARAFRRNLILGDS  | STNNKAFDGI       | PRL            | MHA | DQKIDIA   | 149 |



|     |                     |             |                  |               |                |       |          |           |         |
|-----|---------------------|-------------|------------------|---------------|----------------|-------|----------|-----------|---------|
| 422 | KVKGLARAFRRNLILGNS  | ETNTKAFDGI  | PRL              | ----          | MHK            | ----- | DQNIDIA  | 149       |         |
| 423 | KVKGMARAFRRNLILGNS  | SEANNKAFDGI | PRL              | ----          | MHE            | ----- | DQKIDIA  | 149       |         |
| 424 | KVKGLARAFRRNLILGNS  | TENTKAFDGI  | PKL              | ----          | MHN            | ----- | DQKIDIA  | 149       |         |
| 425 | KVKGLARAFRRNLILGNS  | ETNTKAFDGI  | PRL              | ----          | MHK            | ----- | DQKIDIA  | 149       |         |
| 426 | KVKGLARAFRRNLILGNS  | ETNTKAFDGI  | PRL              | ----          | MHK            | ----- | DQKIDIA  | 149       |         |
| 427 | KVKGLARAFRRNLILGNS  | ETNTKAFDGI  | PRL              | ----          | MHK            | ----- | DQKIDIA  | 149       |         |
| 428 | KVKGLARAFRRNLILGNS  | TENTKAFDGI  | PKL              | ----          | MHN            | ----- | DQKIDIA  | 149       |         |
| 429 | KVKGLARAFRRNLILGDS  | STNNKAFDGI  | PRL              | ----          | MHA            | ----- | DQKIDIA  | 149       |         |
| 430 | KVKGLARAFRRNLILGNS  | ETNTKAFDGI  | PRL              | ----          | MHK            | ----- | DQKIDIA  | 149       |         |
| 431 | KVKGLARAFRRNLILGNS  | TANNKAFDGI  | PKL              | ----          | MHN            | ----- | DQKIDIA  | 149       |         |
| 432 | KAKSAGRQYQTM        | LATGDTGN    | -TFAGLPTL        | ----          | VDA            | ----- | SQKVVTGT | 150       |         |
| 433 | KVKGLARAFRRNLILGDS  | SSNNKAFDGI  | PRL              | ----          | MHA            | ----- | DQKIDIA  | 149       |         |
| 434 | KVKGLARAFRRNLIVGDS  | TTNNKAFDGI  | PKL              | ----          | MHD            | ----- | DQKIDIS  | 149       |         |
| 435 | KVKGLARAFRRNLIVGDS  | TTNNKAFDGI  | PKL              | ----          | MHD            | ----- | DQKIDIS  | 149       |         |
| 436 | KVKGLARAFRRNIIILGNS | TENTKAFDGI  | PKL              | ----          | MHN            | ----- | DQKIDIA  | 149       |         |
| 437 | KVKGLARAFRRNLILGDS  | GANSKSFDGI  | PLL              | ----          | MHA            | ----- | DQKIDIA  | 149       |         |
| 438 | KVKGLARAFRRNIIILGNS | TENTKAFDGI  | PKL              | ----          | MHN            | ----- | DQKIDIA  | 149       |         |
| 439 | KAKGMGREFSKVL       | IQGNS       | TTNAKQFDGIAKL    | ----          | VTS            | ----- | DQTIDGK  | 149       |         |
| 440 | KVKGLARAFRRNLILGDS  | SSNNKAFDGI  | PRL              | ----          | MHA            | ----- | DQKIDIA  | 149       |         |
| 441 | KAKAVAHAF           | LATFYTG     | DASADPKQFDGLRRLL | ----          | VPA            | ----- | SQTFQPGP | 150       |         |
| 442 | KVKGLARSFRRSL       | ILGDS       | TTNAKSFDGI       | PKL           | ----           | IHA   | -----    | DQKI-IA   | 148     |
| 443 | KVKGLARAFRRNLILGDS  | STNTKAFDGI  | PKL              | ----          | MHD            | ----- | DQKIDIE  | 149       |         |
| 444 | KAKAVGRKYSSLL       | INGTGANE    | -EFVGLLGL        | ----          | VSS            | ----- | GQTLTAGT | 150       |         |
| 445 | KAKSAGRNYRNQL       | INGSGAAD    | -EFNGMINL        | ----          | CAT            | ----- | SQKVD    | TGN 150   |         |
| 446 | KVKGLARAFRRNLILGDS  | SSNNKAFDGI  | PRL              | ----          | MHA            | ----- | DQKIDIA  | 149       |         |
| 447 | KVKGLARAFRRNLILGDS  | SSNNKAFDGI  | PRL              | ----          | MHA            | ----- | DQKIDIA  | 149       |         |
| 448 | RAKAVAYAF           | TESFFIG     | DS               | TANPKSFDGLRKL | ----           | VPA   | -----    | AQTISPGA  | 148     |
| 449 | KVKGLARAFRRNLILGDS  | SSNNKAFDGI  | PRL              | ----          | MHA            | ----- | DQKIDIA  | 149       |         |
| 450 | KVKGLARAFRRNLIVGDS  | TTNNKAFDGI  | PRL              | ----          | MHA            | ----- | DQKIDIA  | 149       |         |
| 451 | KAKAVAHAF           | LNAFYRG     | DS               | AVNPKQFDGLRKL | ----           | VPA   | -----    | SQTIQPGP  | 150     |
| 452 | RAKAVAHLF           | SDTFFNG     | DS               | TANPKAFDGLAKL | ----           | VPP   | -----    | SQTLLEPGP | 150     |
| 453 | KVKGLARAFRRNIIILGNS | TENTKAFDGI  | PKL              | ----          | MHN            | ----- | DQKIDIA  | 149       |         |
| 454 | KAKSCGRKYQDQ        | MVNGDGTAN   | -NMTGLFGL        | ----          | VAA            | ----- | GQTI     | TANN 151  |         |
| 455 | KAKAVGRIF           | KKTVAQGN    | NATANPKEFDGLPQL  | ----          | VTS            | ----- | PMTLAAGA | 150       |         |
| 456 | KVKGLARAFRRNLIVGDS  | TTNNKAFDGI  | PKL              | ----          | MHD            | ----- | DQKIDIS  | 149       |         |
| 457 | KVKGLARAFRRNLILGDS  | SSNNKAFDGI  | PRL              | ----          | MHA            | ----- | DQKIDIA  | 149       |         |
| 458 | KVKGLARAFRRNLILGNS  | TENTKAFDGI  | PKL              | ----          | MHN            | ----- | DQKIDIA  | 149       |         |
| 459 | KAKALARTF           | QDSVVNGD    | NVARPKEFDGLKAL   | ----          | TTA            | ----- | AQTI     | TAGA 150  |         |
| 460 | KVKGLARAFRRNLILGDS  | SSNNKAFDGI  | PRL              | ----          | MHA            | ----- | DQKIDIA  | 149       |         |
| 461 | KAKSAGRQYQS         | QMVNGDGTGN  | -NMAGLFGL        | ----          | VAG            | ----- | SQTI     | TANN 151  |         |
| 462 | KVKGLARAFRRNLILGDS  | SSNNKAFDGI  | PRL              | ----          | MHA            | ----- | DQKIDIA  | 149       |         |
| 463 | GEIQTWYGY           | YGRMDVLT    | -GN--PVFGGLPDL   | ----          | VAP            | ----- | ARTINMG  | 58        |         |
| 464 | KVKGLARAFRRNLILGNS  | ETNTKAFDGI  | PRL              | ----          | MHK            | ----- | DQKIDIA  | 149       |         |
| 465 | KVKGLARAFRRNLILGDS  | SSNNKAFDGI  | PRL              | ----          | MHA            | ----- | DQKIDIA  | 149       |         |
| 466 | KVKGLARAFRRNLILGDS  | SSNNKAFDGI  | PRL              | ----          | MHA            | ----- | DQKIDIA  | 149       |         |
| 467 | KVKGLARAFRRNLILGDS  | SSNNKAFDGI  | PRL              | ----          | MHA            | ----- | DQKIDIA  | 149       |         |
| 468 | KVKGLARAFRRNLILGDS  | STNNKAFDGI  | PRL              | ----          | MHA            | ----- | DQKIDIA  | 149       |         |
| 469 | KVKGLARAFRRNLILGDE  | SVDAKAFNGI  | PKL              | ----          | MVP            | ----- | DQSI     | -VA 148   |         |
| 470 | KVKGLARAFRRNLILGDS  | SSNNKAFDGI  | PRL              | ----          | MHE            | ----- | DQKIDIA  | 149       |         |
| 471 | KAKSCGRKFQDM        | LINGTGASD   | -QFEGLINL        | ----          | VAA            | ----- | GQTL     | DNGT 151  |         |
| 472 | KAKTVAREFHRA        | LATGDS      | SVNSKVFDGLPRL    | ----          | LKQAQDFAATAGGS |       | QIVSAGT  | 160       |         |
| 473 | KAKSCGRKFQDM        | LINGTGAND   | -QFEGLINL        | ----          | VAA            | ----- | GQTL     | DNGT 151  |         |
| 474 | KVKGLARAFRRNLILGDS  | SSNNKAFDGI  | PRL              | ----          | MHA            | ----- | DQKIDIA  | 149       |         |
| 475 | KVKGLARAFRRNLILGDS  | SSNSKAFDGI  | PRL              | ----          | MHE            | ----- | DQKIDIA  | 149       |         |
| 476 | KAKSAGRQYQS         | QMVNGDGTGN  | -NMAGLFGL        | ----          | VAG            | ----- | SQTI     | TANN 151  |         |
| 477 | KAKSLGRKFQDS        | LINGDGTGN   | -SFQGLASL        | ----          | ASA            | ----- | SQIID    | VGT 150   |         |
| 478 | KAKAVGRKYANLL       | LNGTGANE    | -EFEGLLTL        | ----          | ASA            | ----- | GQTLIAGA | 150       |         |
| 479 | KAKSAGRKYQDQ        | LINGDGTGN   | -TFTGLLGL        | ----          | AAA            | ----- | GQTI     | GANN 151  |         |
| 480 | KAKSCGRKYQDM        | LINGTGASD   | -EFEGIINL        | ----          | CAE            | ----- | GQKVATGD | 151       |         |
| 481 | KVKGLARAFRRNLILGDS  | SSNNKAFDGI  | PRL              | ----          | MHA            | ----- | DQKIDIA  | 149       |         |
| 482 | KVKGLARAFRRNLILGDS  | SSNNKAFDGI  | PRL              | ----          | MHA            | ----- | DQKIDIA  | 149       |         |
| 483 | KVKGLARAFRRNLILGDS  | ATNTKSFDGI  | PKL              | ----          | IHK            | ----- | DQKI-IA  | 148       |         |
| 484 | KVKGLARAFRRNLILGDS  | SSNNKAFDGI  | PRL              | ----          | MHA            | ----- | DQKIDIA  | 149       |         |
| 485 | RAKAVAHLF           | SDTFFNG     | DS               | TANPKAFDGLATL | ----           | VPA   | -----    | SQTLLEPGP | 150     |
| 486 | KVKGLARAFRRSL       | ILGNADENAK  | SFDGI            | PRL           | ----           | IHK   | -----    | DQKI      | -VA 148 |
| 487 | KVKGLARAFRRNLILGNS  | TENTKAFDGI  | PKL              | ----          | MHN            | ----- | DQKIDIA  | 149       |         |
| 488 | KVKGLARAFRRNLILGDS  | SANAKTFDGI  | PKL              | ----          | IHN            | ----- | DQKI     | -IA 148   |         |

|     |                                                      |     |
|-----|------------------------------------------------------|-----|
| 489 | KVKGLARAFRRNLILGDSVTNAKSFDGIPKL-----IHN-----DQKI-VA- | 148 |
| 490 | KAKSAGRQYQNQMVGNDGTGN--NVAGLFSL-----VAA-----SQTITANN | 151 |
| 491 | KVKGLARAFRRNLILGDS SSNNKAFDGIPL-----MHA-----DQKIDIA- | 149 |
| 492 | KAKAVGRKYSNLLINGTGAND--EFVGLLGL-----ASS-----GQTLTAGA | 150 |
| 493 | KVKGLARAFRRNLIVGDS TTNNKAFDGIPL-----MHD-----DQKIDIS- | 149 |
| 494 | RAKAVAHAFSDAFYNGDSAANPKQFDGLKKL-----VSA-----AQTIAPGA | 150 |
| 495 | KVKGLARAFRRNLIVGDS TTNNKAFDGIPL-----MHD-----DQKIDIS- | 149 |
| 496 | KVKGLARAFRRNLIVGDS TTNNKAFDGIPL-----MHD-----DQKIDIS- | 149 |
| 497 | KAKSIGRQFQTTMVTGDGSGN--TFEGLMSL-----VAS-----TQSFEVGT | 150 |
| 498 | KVKGLARAFRRNLILGDS SSNNKAFDGIPL-----MHA-----DQKIDIA- | 149 |
| 499 | KVKGLARAFRRNLILGDS SSNAKTFDGIPL-----IHN-----DQKI-IA- | 148 |
| 500 | KAKSAGRQYQNQMVGNDGTGN--NVAGLFSL-----VAG-----SQTITANN | 151 |

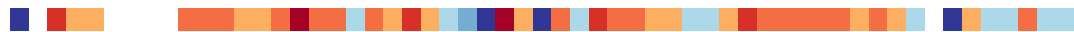

250 260 270 280 290 300

|    |                                                                 |     |
|----|-----------------------------------------------------------------|-----|
| 1  | -----GNI-----LKLEDLDRAKGQIRVKEGESGVIFTNQSGYEQIRKAYYNR--NQIP--   | 191 |
| 2  | -----GNT-----LKLEDLDHAKGQIRVKEGESGVIFTNQSGYEQIRKAYYNR--NQIP--   | 191 |
| 3  | -----GNT-----LKLEDLDRAKGQIRVKEGESGVIFTNQSGYEQIRKAYYNR--NQIP--   | 191 |
| 4  | -----GNT-----LKLEDLDRAKGQIRVKEGESGVIFTNQSGYEQIRKAYYNR--NQIP--   | 191 |
| 5  | -----GNT-----LKLEDLDRAKGQIRVKEGESGVIFTNQSGYEQIRKAYYNR--NQIP--   | 191 |
| 6  | -----GNT-----LKLEDLDRAKGQIRVKEGESGVIFTNQSGYEQIRRAYYNR--NQIP--   | 191 |
| 7  | -----GNT-----LKLEDLDRAKGQIRVKEGESGVIFTNQSGYEQIRKAYYNR--NQIP--   | 191 |
| 8  | -----GNT-----LKLEDLDRAKGQIRVKEGESGVIFTNQSGYEQIRKAYYNR--DQIP--   | 191 |
| 9  | -----GNT-----LKLEDLDRAKGQIRVKEGESGVIFTNQSGYEQIRKAYYNR--NQIP--   | 191 |
| 10 | -----GNT-----LKLEDLDRAKGQIRVKEGESGVIFTNQSGYEQIRKAYYNR--NQIP--   | 191 |
| 11 | -----GNI-----LNLEDLDRAKGQIRVKEGESGVIFTNQSGYEQIRKAYYNR--DQIP--   | 191 |
| 12 | -----GNT-----LKLEDLDRAKGQIRVKEGESGVIFTNQPGYEQIRKAYYNR--NQIP--   | 191 |
| 13 | -----GNI-----LRLEDLDRAKGQIRVKEGEYGVIFTNQSGYEQIRKAYYNR--NQIP--   | 191 |
| 14 | -----GAT-----LTLEDLDRAKGKIRIRNGESGIITNEPGYRLIRKAYYNR--NILP--    | 191 |
| 15 | -----GRE-----LTLEDMDSAKEMVRTNDGRHTVIFTSSIGKRAIHAAYWNR--AVAPEY   | 201 |
| 16 | -----GRP-----LTLEDLDRAKELVRANDGRCVVIFTSSIGKRAINASHYVR--GLRPDS   | 201 |
| 17 | -----GRP-----LTLEDLDRTKELVRANDGRCVVIFTSSIGKRAINASHYVR--GLRPDS   | 201 |
| 18 | -----GRA-----LTLEDLDRARERVRANDGRCVVIFTSSIGKRAINASHYVR--GFKPDS   | 201 |
| 19 | -----FKP-----LTLEVLEQGKELVRTNDGRGTVVFTNSIGKRAIHAAHWTR--GLTPQY   | 200 |
| 20 | -----GRE-----LTLEDMDRAKEMVRTNDGRCIVIFTSTIGKRAIHAAYWNR--GVAPEY   | 202 |
| 21 | -----FQP-----LTLEVLEQGKELVRTNDGRGTVLFTNSTGKRAIHAAHWTR--GLTPQY   | 200 |
| 22 | -----FQP-----LTLETLEQGKELVRTNDGRGTVLFTNSIGKRAIHAAHWTR--GLTPQY   | 200 |
| 23 | -----FQP-----LTLEVLEQGKELVRTNDGRGTVLFTNSTGKRAIHAAHWTR--GLTPQY   | 201 |
| 24 | -----FQP-----LTLEVLEQGKELVRTNDGRGTVLFTNSTGKRAIHAAHWTR--GLTPQY   | 200 |
| 25 | -----FRP-----LTLEVLEQGKELVRTNDGRGTVVFTNSIGKRAIHAAHWTR--GLTPQY   | 200 |
| 26 | -----FNP-----LTLEALEQGKELVRTNDGRGTVLFTNSIGKRAIHAAHWTR--GLTPQY   | 200 |
| 27 | -----GRA-----LTLEDLDSAKELVRANDGRCIVIFTSSIGKRAINASHYVR--GLRPAS   | 201 |
| 28 | -----FQP-----LTLEVLEQGKELVRTNDGRGAVLFTNSTGKRAIHAAHWTR--GLTPQY   | 200 |
| 29 | -----GAA-----LTFAALDQAYHLISENNGRPNAIMSNSRALRTYRNL FVAT-HGIEPPT  | 201 |
| 30 | -----GAA-----LTFAALDQAYHLISENNGRPNAIMSNSRALRTYRNL FVAT-HGIEPPT  | 207 |
| 31 | -----AVN-----LTFAALDQAYNLVTENEGRPNAIMSNSRALRTYQNL FVAT-HGILPPT  | 203 |
| 32 | -----GVA-----LTFAALDQTYNLVTENEGRPNAIMSNSRALRTYQNL FVAT-HGILPPT  | 203 |
| 33 | -----GVA-----LTFAALDQAYNLVTENEGRPNAIMSNSRALRTYQNL FATT-YGILPPT  | 203 |
| 34 | -----GASLDTAGQMEELQQTYNLVTANNGRPTAIMCNSRALRYIVSTFYGL--GANLEY    | 212 |
| 35 | -----SAA-----PTLAKLQETYHLVAANAGMANCIMCNTRGSRAIIKAYNDV--GMHPLY   | 219 |
| 36 | -----GNT-----LKLEDLDRAKGQIRVKEGESGVIFTNQSGYEQIRKAYYNR--DQIP--   | 114 |
| 37 | -----AAP-NAAARIDELQKAYSLITSNNGRPNAIMCNSRAYRWIMAAAYFGV--GANPEY   | 211 |
| 38 | -----GAA-----LTFAAMDQAYNLIKSNQGRPTAIMSNSRAQRTFANLYFGA-GAGEPPM   | 201 |
| 39 | -----GAT-----LTCLKDLIAKGNVRANNGAPIIITTNQHGYEAIRTAHYDA--GITPEI   | 198 |
| 40 | -----TNT-DKYTKLRSLQEAYFKITANNGRPNAIMCNSAAMRWIINAYYLA--GMNPEV    | 208 |
| 41 | -----GTP-----LTLEAVDRAKGYIRTSEMKNKII-TNTTGYYLYREAVHNA--GISFS-   | 196 |
| 42 | -----GAA-----LTFAALDQAYHLIDSNQGRANAIMSNSRALRTFRNLYFGD-GGGEPKD   | 201 |
| 43 | -----GAA-----LTFAAVDQAYHLIESNQGRPNAIMSNSRALRTFRSLYFGA-GGGEPE    | 200 |
| 44 | -----GAA-----LTFAALDQAYHLIESNQGRANAIMSNSRALRTFRNLYFGD-GGGEPKD   | 201 |
| 45 | -----GAA-----LTFAALDQAYNLIRSNGRPSAIMSNSRAQRTFASLYFGA-GGGEPPM    | 201 |
| 46 | -----GGA-----LTLDCLDDAYERITAGTGRPTLIMSHSRSRLTYRKL CRDA--GFKAER  | 192 |
| 47 | -----GGA-----LTLPCLDEAYERVITAGTGRPTLIMSHSRSRLTYRNL CRVA--GFKPER | 193 |
| 48 | -----GGA-----LTLDCLDDAYERITAGTGRPTLIMSHSRSRLTYRKL CRDS--GLVPER  | 192 |
| 49 | -----GGA-----LTLDCLDDAYERITAGTGRPTLIMSHSRSRLTYRKL CRDA--GFKAER  | 192 |

```

50  -----GGA-----LTLACLD DAYERITAGTGRPTLIMSHSRSLRITYRKL CRDA--GFKPER 192
51  -----AGA-----LTLDCLD DAYERVVAGTGRPTLIMSSKRGRLITYRSLCRAA--GFKPER 188
52  -----GAP-----LSFPCLEATFGKV TANNNRPSVIMSNLRSRESYRNLCWAA--GIEPPM 193
53  ---GAGGV---PALRELDQLVGKITTNNGRPHVLYTSRKGAESAIRRAHYRA--SVTP-E 204
54  -----SAS-----PSLAKLQETYHLVVAGGAEANCVMCNSRASRAIIAAYNAA--GMHPQR 200
55  ---GAGGV---PTLAEFDNLLDLVKASADGRATVLYSCRTGFD AWKKAHYNL--NSVPTE 205
56  -----GAA-----LTFAALDQAFHLISENNGRPNAIMSNRA LRTYRNLFVAT-HGIEPPT 201
57  -----GGA-----LTFPCLNLAYNFVVSNNGRPTVIVSSSRELRTYEQLCRDN--GFAPPQ 191
58  -----SVA-----PTLDLLQQTWHLVTAGNARANCIMCNNRASRAIIKAYNDQ--GMHPTE 203
59  ---GAGGI---PSLRELDQLVGKITANGGRPHVLYTSRKGAESIRRAYYRA--GITP-E 204
60  -----GGL-----LTFACLEEAHDLVTANQ GKPTVIMSNARSLRSYRNLCWNA--GIKPPE 193
61  ---GAGGQ---PTLAEFDQLMALVKASADGRPTVLYSSRKGFDSWKKAHYAL--STVPAE 205
62  -----GLG-----LTLDCLD DAYERITAGTGRPTLIMSHSRSLRITYRKL CRDA--GFKAE 192
63  -----GAP-----LSFPCLEAAFDKITGNNNRPSFIMSNLASRASRYRNLCWAT--GIKPPE 193
64  ---GAGGI---PALRELDQLIGKITTNNGRPHVFYTSRKGAESAIRRAYYRE--QVTP-E 204
65  ---GAGGV---PTLAEFDQLIGKVKASDGHPTVLYTSRKGLEALKKAHYNL--NSVPSE 205
66  -----LSS-----LTLDCLD DAYSRVTAGTGRPTLIMSSTKGLRTYRSLCRAA--GIPQER 188
67  -----GGA-----LNFHCLGD AWHRV DANDGRPTMIMSATPALATYELLCRMS--GFEP PK 193
68  -----GLA-----LTTRLLDRAQRRPKSGDNFDGYICTSAQGYIEIRQAFLAS--GTLPQE 201
69  -----GLA-----LTTRLLDRAQRRIKAGDNFEGMIWTSAQGYIEIRQAFLAS--GTLPQE 217
70  -----GVP-----TLQQFDDAFFSVVDNEGYPNAIMGRTGSLKRYLNL MRAA--NQDIVY 202
71  -----GVP-----TLQQFDDAFFKVVDNEGYPNAVMGRTGSLKRFLNL MRAA--NQDIVY 253
72  -----GVP-----TLQQFDDAFFKVVDNEGYPNAVMGRTGSLKRFLNL MRAA--NQDIVF 248
73  -----GVP-----TLQQFDDAFFRVVDNEGYPSVIMGRTGSLKRFLNL MRAA--NQDIKY 202
74  ---N-GNA-----LSFSMLDELLDAVPY--GA-DAIIMRSGTVRAYRALLRAT-GATGPTE 198
75  -----GGA-----LTLPCLD EAYERVAAGTGRPTLIMSHSRSLRITYRNLCRAA--GLKPER 193
76  -----GAA-----LTFAALDQAYHLISENNGRPNAIMSNRA LRTYRNLFVAT-HGIEPPT 136
77  -----AAP-----LSFPCLSRAYHLVAANN GKPTVIMSNARSL ESYENLCRLN--GQNLEY 193
78  ---N-GAA-----VTCEMLDELKDTV LN--GA-DVLM MRQGTWRAIR SILRNM-GGNDASH 198
79  -----GAA-----LTFAALDQAFHLISENNGRPNAIMSNRA LRTYRNLFVAT-HGIEPPT 201
80  ---N-GNA-----LTL SMLDELLDAVPN--GA-DVLM MRSGTIRAYRALLRAS-GGLEPAH 198
81  ---N-GAP-----ITL TMLDELLDAVPN--GA-DAIIMRSGTLRAYRALLRAM-GGTLPE 199
82  ---D-GAA-----LTL SMLDELCD AIPN--GA-DVLMVMSRGAIRAYRTLLRAT-YGTDAM 198
83  ---N-GAA-----VSAEMLDELLDAVKL--GA-DVLM MRRGTWRAIRAIMRSF-GGNTGDM 198
84  ---N-GAA-----VSAEMLDELLDAVKL--GA-DVLM MRRGTWRAIRAIMRSF-GGNTGDM 198
85  ---N-GAA-----VSAEMLDELLDAVKL--GA-DVLM MRRGTWRAIRAIMRSF-GGNTGDM 198
86  ---N-GAA-----VSAEMLDELLDAVKL--GA-DVLM MRRGTWRAIRAIMRSF-GGNTGDM 198
87  -----GVP-----TLQQFDEALSLVVDNEAHPTAIMSNWGA LKRYLALLRAA--GLKPD 193
88  -----SAA-----PTLAKLQETYHLVVAGGAEANCIMCNSRASRAIIAAYNAA--GLHPNR 151
89  ---N-GAA-----ISA EMLDELLDAVKL--GA-DVLM MRRGTWRAIRAIMRSF-GGNTGDM 198
90  ---N-GSA-----VNFGMLDELKDAVKN--GA-DVLM MRQGTWRAVRALLRAA-GGNEAAT 198
91  -----GAA-----LTLDCLD DAYERVVAGTGRPTLIMSHSRSLRITYRSLCRAA--GI-YQR 148
92  -----GVP-----TLAQFDQAYSLVVDNEAHPTAIMSNWGA LRRYLDLLRAA--GLKPD 193
93  -----GVP-----TLAQFDRALSLVVDNEAHPTAIMSNWGA LRRYLDLLRTA--GLKPD 193
94  -----GNA-----MSFTMLDELLDAVPN--GA-DAIFMTSAHIRALRAMLRAT-GGLEPAH 196
95  ---N-GAA-----VSAEMLDELLDAVKL--GA-DVLM MRRGTWRAIRAIMRSF-GGNTGDM 198
96  ---N-GGS-----LTLAMLDELCD AVPK--GA-DVLM MRRGTIRAYRNLLRAT-SGTDAM 198
97  ---D-GAA-----VSFTMLDEL RDVVKN--GC-DVLM MRRGTWRSIKALLRAM-GGNDAGT 198
98  ---N-GAA-----ISLSMLDELIDKLEG--RRPDALMMRTGT LRALKALWRLA-GGNTGGM 200
99  ---N-GSA-----VTFTMLDEL RD A VKN--GC-DVLM MRRGTWRAIKQLLRAM-GGNDATT 198
100  ---N-GGA-----VSLAILDELVDKLTG--KKPD AFV MRSGLRALKALWRAA-GGNTGGM 200
101  ---N-GAA-----LTL SMLDELLDAVPY--GA-DVIMMRAGTLRAHRALLRSL-GGTSVDN 199
102  -----GAA-----LALADYDTYYFKVSA--GRCNAIVSNSAQVIRYLTLMRAA--GLTPEF 200
103  ---N-GGA-----ISLSMLDELIDKLDG--RRPDALMMRTGT LRALKALWRLA-GGNTGGM 200
104  ---D-GGA-----ITLALLDELLDKVPH--GA-DCLVMRRGTIRAYRNLLRVT-SGTDAM 198
105  ---D-GNP-----LTL TMLDELCD AVPN--GA-DVIMVRRGTIRAYRALLRAT-YGTDAM 198
106  ---D-GNP-----LTL TMLDELCD AVPN--GA-DVIMVRRGTIRAYRALLRAT-YGTDAM 196
107  -----GQA-----LTL SMLDELCD TVPH--GA-DALVMRRGTIRAVRGLLRAT-YGTDAM 196
108  ---D-GNP-----LTL TMLDELCD AVPN--GA-DVIMVRRGTIRAYRALLRAT-YGTDAM 198
109  ---D-GNP-----LTL TMLDELCD AVPN--GA-DVIMVRRGTIRAYRALLRAT-YGTDAM 198
110  ---D-GNP-----LTL TMLDELCD AVPN--GA-DVIMVRRGTIRAYRALLRAT-YGTDAM 198
111  ---N-GGA-----LTL SMLDQLYDMVLT--GA-DAFFMRAGTIRAYRALVRAT-GGTDATQ 198
112  ---D-GNP-----LTL TMLDELCD AVPN--GA-DVIMVRRGTIRAYRALLRAT-YGTDAM 200
113  ---D-GNP-----LTL TMLDELCD AVPN--GA-DVIMVRRGTIRAYRALIRAT-YGTDAM 198
114  ---D-GNP-----LTL TMLDELCD AVPN--GA-DVIMVRRGTIRAYRALLRAT-YGTDAM 198
115  ---N-GSA-----LSLAALDELIDMVNG--RPDALMMRPGTFRALKT LWRAA-GGNTGGM 199
116  -----GSA-----LTF SMLDELVD A VPL--KP-DC LIMRSGTYRAYLQLLRAT-SGTNAPL 196

```

```

117 ---D-GGA----ITLALLDELLDKVPH--GA-DCLVMRRGTIRAYRNLLRVT-SGTDAMV 198
118 ---D-GGG----ITLALLDELLDKVPH--GA-DCLVMRRGTIRAYRNLLRVT-SGTDAMV 198
119 ----NAA----LTFSMLDELVDVAVPL--KP-DCLIMRSGTYRAYLQLLRAT-SGTNAPL 196
120 ---D-GGA----LTLSALDHLVDSVPN--GGPDFLMMRSGTRRAYVAQLRAA-GGNTGAM 199
121 ---D-GNP----LTLTMLDELCDVAVPN--GA-DVIVMRRGTIRAYRALLRAT-YGTDAMV 198
122 ---D-GNP----LTLTMLDELCDVAVPN--GA-DVIVMRRGTIRAYRALLRAT-YGTDAMV 198
123 ---N-GGA----LTLAKLDELCDLVPN--GA-DVIVMRRGTIRAFRSLLRAT-YGTDAMV 198
124 ---D-GNP----LTLTMLDELCDVAVPN--GA-DVIVMRRGTIRAYRALLRAT-YGTDAMV 198
125 ---D-GNP----LTLTMLDELCDVAVPN--GA-DVIVMRRGTIRAYRALLRAT-YGTDAMV 198
126 ---D-GNP----LTLTMLDELCDVAVPN--GA-DVIVMRRGTIRAYRALLRAT-YGTDAMV 198
127 ---D-GAA----VSFTMLDELRDVAVIG--GA-DVLMMRKGTWRRAIKALLRAM-GGNDAGT 198
128 ---D-GAA----VSFTMLDELRDVAVIG--GA-DVLMMRKGTWRSIKALLRAM-GGNDAGT 198
129 ---N-GAP----LTLSMMDELADAVIN--GA-DAFVMRPGTIRAYRALLYAT-GGVQPPAM 198
130 ---N-GAP----LTLSMMDELADAVIN--GA-DAFVMRPGTIRAYRALLYAT-GGIQPPAM 198
131 ---N-GAS----LTLSMMDELADAVIN--GA-DAFVMRPGTIRAYRALLYAT-GGIQPPAM 198
132 ---D-GNP----LTLTMLDELCDVAVPN--GA-DVIVMRRGTIRAYRALLRAT-YGTDAMV 198
133 ---T-GMN----LSFGVLDTLMHLVVSQDGGQVDYMLMPARTIRAYKALLRAL-GGAGVNE 201
134 ---N-GAP----LTLSMMDELADAVIN--GA-DAFVMRPGTIRAYRALLYAT-GGIQPPAM 198
135 ---D-GNP----LTLTMLDELCDVAVPN--GA-DVIVMRRGTIRAYRALLRAT-YGTDAMV 198
136 ----SNA----LTFSMLDELLDAIPL--GA-DCLMMRSGTYRAYLNLLRAT-SGTNAPL 196
137 ---D-GEA----LTFERLDQLLRMVPL--GA-DALVMRGGTHDAILAMLRNL-GGTTTPND 198
138 ---N-GGA----LTLSMLDELCDVAVPN--GA-DVIVMRRGTIRAFRGLLRAT-YGTDAMV 201
139 ---N-GAA----VTFSMLDELRDVAVLL--GA-DCFMMRQGTWRRAIKALLRGF-NGNTAET 198
140 ----GAA----MNWSMLDEVVDVAVNAL--GC-DAIMMRSEHKRAYLQLLRATV-GGLQPSE 197
141 ---N-GSA----LTLSMLDELVDMPN--GA-DCLVMRSGTVRAYRALLRAA-GGTSPSE 201
142 ---N-GGA----LSFAQLDELLDAVPK--GA-DCLMMRGTWRRAIRALNRAF-GGNVAED 198
143 ----GAA----MNWSMLDEVVDVAVNAL--GC-DAIMMRSEHKRAYLQLLRATV-GGLQPSE 197
144 ---N-GAA----ISPSMLDELKDAVKY--GA-DVLMMRQGTWRALREIMRQF-GGNTGDM 198
145 ---D-GGA----VSLMALDELIDAVSL--GA-DCLMMREGTWRAIRALLRAT-GGITPEY 198
146 ---D-GEA----LTFERLDQLLRVAVPL--GA-DALVMRGGTHDAILAMLRNL-GGTTTPDH 198
147 ----KAA----MTFSMFDELVDVAVKDL--GA-DCIMMRSEHLRAYRALLRTV--NIGPSE 196
148 ----KAA----MTFSMFDELVDVAVKDL--GA-DCIMMRSEHLRAYRALLRTV--NIGPSE 196
149 ----KAA----MTFSMFDELVDVAVKDL--GA-DCIMMRSEHLRAYRALLRTV--NIGPSE 196
150 ----KAA----MTFSMFDELVDVAVKDL--GA-DCIMMRSEHLRAYRALLRTV--NIGPSE 196
151 ----GAS----MTFSMFDELVDVAVKDL--GA-DCIMMRSEHLRAYRALLRTV--NVGPSE 196
152 ----KAA----MTFSMFDELVDVAVKDL--GA-DCIMMRSEHLRAYRALLRTV--NIGPSE 196
153 ---N-GAA----INPSMLDELKDAVKY--GA-DVLMMRQGTWRALREIMRQF-GGNTGDM 198
154 ----KAA----MTFSMFDELVDVAVKDL--GA-DCIMMRSEHLRAYRALLRTV--NVGPSE 196
155 ----GAS----MTFSMFDELVDVAVKDL--GA-DCIMMRSEHLRAYRALLRTV--NVGPSE 196
156 ----KAA----MTFSMFDELVDVAVKDL--GA-DCIMMRSEHLRAYRALLRTV--NIGPSE 196
157 ----KAA----MTFSMFDELVDVAVKDL--GA-DCIMMRSEHLRAYRALLRTV--NIGPSE 196
158 ----GAS----MTFSMFDELVDVAVKDL--GA-DCIMMRSEHLRAYRALLRTV--NVGPSE 196
159 ----GAS----MTFSMFDELVDVAVKDL--GA-DCIMMRSEHLRAYRALLRTV--NVGPSE 196
160 ----GAS----MTFSMFDELVDVAVKDL--GA-DCIMMRSEHLRAYRALLRTV--NVGPSE 196
161 ---D-GGG----ITLALLDELLDKVPH--GA-DCLVMRRGTIRAYRNLLRVT-SGTDAMV 198
162 ---N-GAA----LNLSLLDKLLDAVPN--GA-DALFMPSSVIRAFRALMRTTGGGTSAAE 205
163 ----GAS----MTFSMFDELVDVAVKDL--GA-DCIMMRSEHLRAYRALLRTV--NVGPSE 196
164 ----KAA----MTFSMFDELVDVAVKDL--GA-DCIMMRSEHLRAYRALLRTV--NIGPSE 196
165 ----KAA----MTFSMFDELVDVAVKDL--GA-DCIMMRSEHLRAYRALLRTV--NIGPSE 196
166 ----KAA----MTFSMFDELVDVAVKDL--GA-DCIMMRSEHLRAYRALLRTV--NIGPSE 196
167 ----KAA----MTFSMFDELVDVAVKDL--GA-DCIMMRSEHLRAYRALLRTV--NIGPSE 196
168 ----KAA----MTFSMFDELVDVAVKDL--GA-DCIMMRSEHLRAYRALLRTV--NIGPSE 196
169 ----KAA----MTFSMFDELVDVAVKDL--GA-DCIMMRSEHLRAYRALLRTV--NIGPSE 196
170 ----GAS----MTFSMFDELVDVAVKDL--GA-DCIMMRSEHLRAYRALLRTV--NVGPSE 196
171 ----KAA----MTFSMFDELVDVAVKDL--GA-DCIMMRSEHLRAYRALLRTV--NIGPSE 196
172 ----GAS----MTFSMFDELVDVAVKDL--GA-DCIMMRSEHLRAYRALLRTV--NVGPSE 196
173 ----GAS----MTFSMFDELVDVAVKDL--GA-DCIMMRSEHLRAYRALLRTV--NVGPSE 196
174 ----GAS----MTFSMFDELVDVAVKDL--GA-DCIMMRSEHLRAYRALLRTV--NVGPSE 196
175 ----GAS----MTFSMFDELVDVAVKDL--GA-DCIMMRSEHLRAYRALLRTV--NVGPSE 196
176 ----KAA----MTFSMFDELVDVAVKDL--GA-DCIMMRSEHLRAYRALLRTV--NIGPSE 196
177 ----GAS----MTFSMFDELVDVAVKDL--GA-DCIMMRSEHLRAYRALLRTV--NVGPSE 196
178 ----GAS----MTFSMFDELVDVAVKDL--GA-DCIMMRSEHLRAYRALLRTV--NVGPSE 196
179 ----GAS----MTFSMFDELVDVAVKDL--GA-DCIMMRSEHLRAYRALLRTV--NVGPSE 196
180 ----KAA----MTFSMFDELVDVAVKDL--GA-DCIMMRSEHLRAYRALLRTV--NIGPSE 196
181 ----GAS----MTFSMFDELVDVAVKDL--GA-DCIMMRSEHLRAYRALLRTV--NVGPSE 196
182 ----GAS----MTFSMFDELVDVAVKDL--GA-DCIMMRSEHLRAYRALLRTV--NVGPSE 196
183 ----GAS----MTFSMFDELVDVAVKDL--GA-DCIMMRSEHLRAYRALLRTV--NVGPSE 196

```



|     |       |     |      |             |           |           |            |            |            |            |         |         |      |     |      |     |     |
|-----|-------|-----|------|-------------|-----------|-----------|------------|------------|------------|------------|---------|---------|------|-----|------|-----|-----|
| 184 | ----  | GAS | ---- | MTFSMFDELVD | AVKDL     | -GA-      | DCIMMRSEHL | RAYRALLRTV | -          | NVGPSE     | 196     |         |      |     |      |     |     |
| 185 | ----  | GAS | ---- | MTFSMFDELVD | AVKDL     | -GA-      | DCIMMRSEHL | RAYRALLRTV | -          | NVGPSE     | 196     |         |      |     |      |     |     |
| 186 | ----  | GAS | ---- | MTFSMFDELVD | AVKDL     | -GA-      | DCIMMRSEHL | RAYRALLRTV | -          | NVGPSE     | 196     |         |      |     |      |     |     |
| 187 | ----  | GAS | ---- | MTFSMFDELVD | AVKDL     | -GA-      | DCIMMRSEHL | RAYRALLRTV | -          | NVGPSE     | 196     |         |      |     |      |     |     |
| 188 | ----  | GAS | ---- | MTFSMFDELVD | AVKDL     | -GA-      | DCIMMRSEHL | RAYRALLRTV | -          | NVGPSE     | 196     |         |      |     |      |     |     |
| 189 | ----  | GAS | ---- | MTFSMFDELVD | AVKDL     | -GA-      | DCIMMRSEHL | RAYRALLRTV | -          | NVGPSE     | 196     |         |      |     |      |     |     |
| 190 | ---N- | GAK | ---- | LT          | LAKFDEALD | LVAP-     | GRPDLIC    | MSKRTL     | RELKTL     | LRRAA      | GVSEEAH | 199     |      |     |      |     |     |
| 191 | ----  | GAS | ---- | MTFSMFDELVD | AVKDL     | -GA-      | DCIMMRSEHL | RAYRALLRTV | -          | NVGPSE     | 196     |         |      |     |      |     |     |
| 192 | ---N- | GGA | ---- | VS          | LEALDELK  | DAVLL-    | GA-        | DAFMMR     | EGTW       | RGLKSI     | LRTF    | GGNTAPM | 198  |     |      |     |     |
| 193 | ----  | GAS | ---- | MTFSMFDELVD | AVKDL     | -GA-      | DCIMMRSEHL | RAYRALLRTV | -          | NVGPSE     | 196     |         |      |     |      |     |     |
| 194 | ----  | GAS | ---- | MTFSMFDELVD | AVKDL     | -GA-      | DCIMMRSEHL | RAYRALLRTV | -          | NVGPSE     | 196     |         |      |     |      |     |     |
| 195 | ----  | GAS | ---- | MTFSMFDELVD | AVKDL     | -GA-      | DCIMMRSEHL | RAYRALLRTV | -          | NVGPSE     | 196     |         |      |     |      |     |     |
| 196 | ----  | GAS | ---- | MTFSMFDELVD | AVKDL     | -GA-      | DCIMMRSEHL | RAYRALLRTV | -          | NVGPSE     | 196     |         |      |     |      |     |     |
| 197 | ----  | GAS | ---- | MTFSMFDELVD | AVKDL     | -GA-      | DCIMMRSEHL | RS         | SYRALLRTV  | -          | NVGPSE  | 196     |      |     |      |     |     |
| 198 | ----  | GAS | ---- | MTFSMFDELVD | AVKDL     | -GA-      | DCIMMRSEHL | RAYRALLRTV | -          | NVGPSE     | 196     |         |      |     |      |     |     |
| 199 | ----  | GAS | ---- | MTFSMFDELVD | AVKDL     | -GA-      | DCIMMRSEHL | RAYRALLRTV | -          | NVGPSE     | 196     |         |      |     |      |     |     |
| 200 | ----  | GAS | ---- | MTFSMFDELVD | AVKDL     | -GA-      | DCIMMRSEHL | RAYRALLRTV | -          | NVGPSE     | 196     |         |      |     |      |     |     |
| 201 | ----  | GAS | ---- | MTFSMFDELVD | AVKDL     | -GA-      | DCIMMRSEHL | RAYRALLRTV | -          | NVGPSE     | 196     |         |      |     |      |     |     |
| 202 | ---N- | GAA | ---- | VS          | PEMLDELK  | DAVKY-    | GA-        | DVLM       | MKQATW     | RAIRAI     | LRGM    | PGNAADS | 198  |     |      |     |     |
| 203 | ----  | GAS | ---- | MTFSMFDELVD | AVKDL     | -GA-      | DCIMMRSEHL | RAYRALLRTV | -          | NVGPSE     | 196     |         |      |     |      |     |     |
| 204 | ---N- | GGA | ---- | LT          | LTMLD     | QLCD      | AVPN-      | GP-        | DVI        | VMRRTI     | RAFRALL | RAT     | YGTD | AVM | 199  |     |     |
| 205 | ----  | GAS | ---- | MTFSMFDELVD | AVKDL     | -GA-      | DCIMMRSEHL | RAYRALLRTV | -          | NVGPSE     | 196     |         |      |     |      |     |     |
| 206 | ----  | GAS | ---- | MTFSMFDELVD | AVKDL     | -GA-      | DCIMMRSEHL | RAYRALLRTV | -          | NVGPSE     | 196     |         |      |     |      |     |     |
| 207 | ----  | GAS | ---- | MTFSMFDELVD | AVKDL     | -GA-      | DCIMMRSEHL | RAYRALLRTV | -          | NVGPSE     | 196     |         |      |     |      |     |     |
| 208 | ----  | GAS | ---- | MTFSMFDELVD | AVKDL     | -GA-      | DCIMMRSEHL | RAYRALLRTV | -          | NVGPSE     | 196     |         |      |     |      |     |     |
| 209 | ----  | GAS | ---- | MTFSMFDELVD | AVKDL     | -GA-      | DCIMMRSEHL | RAYRALLRTV | -          | NVGPSE     | 196     |         |      |     |      |     |     |
| 210 | ----  | GAS | ---- | MTFSMFDELVD | AVKDL     | -GA-      | DCIMMRSEHL | RAYRALLRTV | -          | NVGPSE     | 196     |         |      |     |      |     |     |
| 211 | ----  | GAS | ---- | MTFSMFDELVD | AVKDL     | -GA-      | DCIMMRSEHL | RAYRALLRTV | -          | NVGPSE     | 196     |         |      |     |      |     |     |
| 212 | ----  | GAS | ---- | MTFSMFDELVD | AVKDL     | -GA-      | DCIMMRSEHL | RAYRALLRTV | -          | NVGPSE     | 196     |         |      |     |      |     |     |
| 213 | ----  | GAS | ---- | MTFSMFDELVD | AVKDL     | -GA-      | DCIMMRSEHL | RAYRALLRTV | -          | NVGPSE     | 196     |         |      |     |      |     |     |
| 214 | ----  | GAS | ---- | MTFSMFDELVD | AVKDL     | -GA-      | DCIMMRSEHL | RAYRALLRTV | -          | NVGPSE     | 196     |         |      |     |      |     |     |
| 215 | ----  | GAS | ---- | MTFSMFDELVD | AVKDL     | -GA-      | DCIMMRSEHL | RAYRALLRTV | -          | NVGPSE     | 196     |         |      |     |      |     |     |
| 216 | ----  | GAS | ---- | MTFSMFDELVD | AVKDL     | -GA-      | DCIMMRSEHL | RAYRALLRTV | -          | NVGPSE     | 196     |         |      |     |      |     |     |
| 217 | ----  | GAS | ---- | MTFSMFDELVD | AVKDL     | -GA-      | DCIMMRSEHL | RAYRALLRTV | -          | NVGPSE     | 196     |         |      |     |      |     |     |
| 218 | ----  | GAS | ---- | MTFSMFDELVD | AVKDL     | -GA-      | DCIMMRSEHL | RAYRALLR   | I          | V          | -       | NVGPSE  | 196  |     |      |     |     |
| 219 | ----  | GAS | ---- | MTFSMFDELVD | AVKDL     | -GA-      | DCIMMRSEHL | RAYRALLRTV | -          | NVGPSE     | 196     |         |      |     |      |     |     |
| 220 | ----  | GAS | ---- | MTFSMFDELVD | AVKDL     | -GA-      | DCIMMRSEHL | RAYRALLRTV | -          | NVGPSE     | 196     |         |      |     |      |     |     |
| 221 | ----  | GAS | ---- | MTFSMFDELVD | AVKDL     | -GA-      | DCIMMRSEHL | RAYRALLRTV | -          | NVGPSE     | 196     |         |      |     |      |     |     |
| 222 | ----  | GAS | ---- | MTFSMFDELVD | AVKDL     | -GA-      | DCIMMRSEHL | RAYRALLRTV | -          | NVGPSE     | 196     |         |      |     |      |     |     |
| 223 | ----  | GAS | ---- | MTFSMFDELVD | AVKDL     | -GA-      | DCIMMRSEHL | RAYRALLRTV | -          | NVGPSE     | 196     |         |      |     |      |     |     |
| 224 | ----  | GAS | ---- | MTFSMFDELVD | AVKDL     | -GA-      | DCIMMRSEHL | RAYRALLRTV | -          | NVGPSE     | 196     |         |      |     |      |     |     |
| 225 | ----  | GAS | ---- | MTFSMFDELVD | AVKDL     | -GA-      | DCIMMRSEHL | RAYRALLRTV | -          | NVGPSE     | 196     |         |      |     |      |     |     |
| 226 | ----  | GAS | ---- | MTFSMFDELVD | AVKDL     | -GA-      | DCIMMRSEHL | RAYRALLRTV | -          | NVGPSE     | 196     |         |      |     |      |     |     |
| 227 | ----  | GAS | ---- | MTFSMFDELVD | AVKDL     | -GA-      | DCIMMRSEHL | RAYRALLRTV | -          | NVGPSE     | 196     |         |      |     |      |     |     |
| 228 | ----  | ASA | ---- | LN          | FAMLD     | ELL       | D          | KVPN-      | GA-        | DILV       | MNRPTI  | RAYR    | QIL  | RAT | SGTD | AVM | 196 |
| 229 | ----  | GAS | ---- | MTFSMFDELVD | AVKDL     | -GA-      | DCIMMRSEHL | RAYRALLRTV | -          | NVGPSE     | 196     |         |      |     |      |     |     |
| 230 | ----  | ASA | ---- | LN          | FAMLD     | ELL       | D          | KVPN-      | GA-        | DILV       | MNRPTI  | RAYR    | QIL  | RAT | SGTD | AVM | 196 |
| 231 | ----  | GAS | ---- | MTFSMFDELVD | AVKDL     | -GA-      | DCIMMRSEHL | RAYRALLRTV | -          | NVGPSE     | 196     |         |      |     |      |     |     |
| 232 | ----  | GAS | ---- | MTFSMFDELVD | AVKDL     | -GA-      | DCIMMRSEHL | RAYRALLRTV | -          | NVGPSE     | 196     |         |      |     |      |     |     |
| 233 | ----  | GAS | ---- | MTFSMFDELVD | AVKDL     | -GA-      | DCIMMRSEHL | RAYRALLRTV | -          | NVGPSE     | 196     |         |      |     |      |     |     |
| 234 | ----  | GAS | ---- | MTFSMFDELVD | AVKDL     | -GA-      | DCIMMRSEHL | RAYRALLRTV | -          | NVGPSE     | 196     |         |      |     |      |     |     |
| 235 | ----  | GAS | ---- | MTFSMFDELVD | AVKDL     | -GA-      | DCIMMRSEHL | RAYRALLRTV | -          | NVGPSE     | 196     |         |      |     |      |     |     |
| 236 | ----  | GAS | ---- | MTFSMFDELVD | AVKDL     | -GA-      | DCIMMRSEHL | RS         | SYRALLRTV  | -          | NVGPSE  | 196     |      |     |      |     |     |
| 237 | ----  | GAS | ---- | MTFSMFDELVD | AVKDL     | -GA-      | DCIMMRSEHL | RAYRALLRTV | -          | NVGPSE     | 196     |         |      |     |      |     |     |
| 238 | ----  | GAS | ---- | MTFSMFDELVD | AVKDL     | -GA-      | DCIMMRSEHL | RAYRALLRTV | -          | NVGPSE     | 196     |         |      |     |      |     |     |
| 239 | ---N- | GG  | ---- | LT          | LELLD     | QLID      | LVKP-      | GKPD       | ALL        | MSKRT      | RRKLAQ  | LRRSS   | GT   | VLE | SE   | 199 |     |
| 240 | ----  | GAS | ---- | MTFSMFDELVD | AVKDL     | -GA-      | DCIMMRSEHL | RAYRALLRTV | -          | NVGPSE     | 196     |         |      |     |      |     |     |
| 241 | ----  | GAS | ---- | MTFSMFDELVD | AVKDL     | -GA-      | DCIMMRSEHL | RAYRALLRTV | -          | N          | I       | GPSE    | 196  |     |      |     |     |
| 242 | ----  | GAS | ---- | MTFSMFDELVD | AVKDL     | -GA-      | DCIMMRSEHL | RAYRALLRTV | -          | NVGPSE     | 196     |         |      |     |      |     |     |
| 243 | ----  | GAS | ---- | MTFSMFDELVD | AVKDL     | -GA-      | DCIMMRSEHL | RAYRALLRTV | -          | NVGPSE     | 196     |         |      |     |      |     |     |
| 244 | ----  | GAS | ---- | MTFSMFDELVD | AVKDL     | -GA-      | DCIMMRSEHL | RAYRALLRTV | -          | NVGPSE     | 196     |         |      |     |      |     |     |
| 245 | ----  | GAS | ---- | MTFSMFDELVD | AVKDL     | -GA-      | DCIMMRSEHL | RAYRALLRTV | -          | NVGPSE     | 196     |         |      |     |      |     |     |
| 246 | ----  | GAS | ---- | MTFSMFDELVD | AVKDL     | -GA-      | DCIMMRSEHL | RAYRALLRTV | -          | NVGPSE     | 196     |         |      |     |      |     |     |
| 247 | ----  | GAS | ---- | MTFSMFDELVD | AVKDL     | -GA-      | DCIMMRSEHL | RAYRALLRTV | -          | NVGPSE     | 196     |         |      |     |      |     |     |
| 248 | ----  | GAS | ---- | MTFSMFDELVD | AVKDL     | -GA-      | DCIMMRSEHL | RAYRALLRTV | -          | NVGPSE     | 196     |         |      |     |      |     |     |
| 249 | ----  | GAS | ---- | M           | S         | FSMFDELVD | AVKDL      | -GA-       | DCIMMRSEHL | RAYRALLRTV | -       | NVGPSE  | 196  |     |      |     |     |
| 250 | ----  | GAS | ---- | MTFSMFDELVD | AVKDL     | -GA-      | DCIMMRSEHL | RAYRALLRTV | -          | NVGPSE     | 196     |         |      |     |      |     |     |





|     |      |     |      |             |             |        |            |            |            |            |          |     |   |   |   |   |   |   |   |   |   |   |   |   |   |   |   |   |   |   |   |   |   |   |   |   |   |   |   |   |   |   |   |   |   |   |   |   |   |   |   |   |   |     |   |     |     |
|-----|------|-----|------|-------------|-------------|--------|------------|------------|------------|------------|----------|-----|---|---|---|---|---|---|---|---|---|---|---|---|---|---|---|---|---|---|---|---|---|---|---|---|---|---|---|---|---|---|---|---|---|---|---|---|---|---|---|---|---|-----|---|-----|-----|
| 318 | ---- | GAS | ---- | MTFSMFDELVD | AVKDL       | -GA-   | DCIMMRSEHL | RAYRALLRTV | --NVGPSE   | 196        |          |     |   |   |   |   |   |   |   |   |   |   |   |   |   |   |   |   |   |   |   |   |   |   |   |   |   |   |   |   |   |   |   |   |   |   |   |   |   |   |   |   |   |     |   |     |     |
| 319 | ---- | GAS | ---- | MTFSMFDELVD | AVKDL       | -GA-   | DCIMMRSEHL | RAYRALLRTV | --NVGPSE   | 196        |          |     |   |   |   |   |   |   |   |   |   |   |   |   |   |   |   |   |   |   |   |   |   |   |   |   |   |   |   |   |   |   |   |   |   |   |   |   |   |   |   |   |   |     |   |     |     |
| 320 | ---- | GAS | ---- | MTFSMFDELVD | AVKDL       | -GA-   | DCIMMRSEHL | RAYRALLRTV | --SLGPSE   | 196        |          |     |   |   |   |   |   |   |   |   |   |   |   |   |   |   |   |   |   |   |   |   |   |   |   |   |   |   |   |   |   |   |   |   |   |   |   |   |   |   |   |   |   |     |   |     |     |
| 321 | ---- | GAS | ---- | MTFSMFDELVD | AVKDL       | -GA-   | DCIMMRSEHL | RAYRALLRTV | --NVGPSE   | 196        |          |     |   |   |   |   |   |   |   |   |   |   |   |   |   |   |   |   |   |   |   |   |   |   |   |   |   |   |   |   |   |   |   |   |   |   |   |   |   |   |   |   |   |     |   |     |     |
| 322 | ---- | GAS | ---- | MTFSMFDEL   | I           | DAVKDL | -GA-       | DCIMMRSEHL | RAYRALLRTV | --SLGPSE   | 196      |     |   |   |   |   |   |   |   |   |   |   |   |   |   |   |   |   |   |   |   |   |   |   |   |   |   |   |   |   |   |   |   |   |   |   |   |   |   |   |   |   |   |     |   |     |     |
| 323 | ---- | GAS | ---- | MTFSMFDELVD | AVKDL       | -GA-   | DCIMM      | CSEHL      | RAYRALLRTV | --SLGPSE   | 196      |     |   |   |   |   |   |   |   |   |   |   |   |   |   |   |   |   |   |   |   |   |   |   |   |   |   |   |   |   |   |   |   |   |   |   |   |   |   |   |   |   |   |     |   |     |     |
| 324 | ---- | GAS | ---- | MTFSMFDELVD | AVKDL       | -GA-   | DCIMMRSEHL | RAYRALLRTV | --NVGPSE   | 196        |          |     |   |   |   |   |   |   |   |   |   |   |   |   |   |   |   |   |   |   |   |   |   |   |   |   |   |   |   |   |   |   |   |   |   |   |   |   |   |   |   |   |   |     |   |     |     |
| 325 | ---- | GAS | ---- | MTFSMFDELVD | AVKDL       | -GA-   | DCIMMRSEHL | RAYRALLRTV | --NVGPSE   | 196        |          |     |   |   |   |   |   |   |   |   |   |   |   |   |   |   |   |   |   |   |   |   |   |   |   |   |   |   |   |   |   |   |   |   |   |   |   |   |   |   |   |   |   |     |   |     |     |
| 326 | ---- | GAS | ---- | MTFSMFDELVD | AVKDL       | -GA-   | DCIMMRSEHL | RAYRALLRTV | --NVGPSE   | 196        |          |     |   |   |   |   |   |   |   |   |   |   |   |   |   |   |   |   |   |   |   |   |   |   |   |   |   |   |   |   |   |   |   |   |   |   |   |   |   |   |   |   |   |     |   |     |     |
| 327 | ---- | GAS | ---- | MTFSMFDELVD | AVKDL       | -GA-   | DCIMMRSEHL | RAYRALLRTV | --NVGPSE   | 196        |          |     |   |   |   |   |   |   |   |   |   |   |   |   |   |   |   |   |   |   |   |   |   |   |   |   |   |   |   |   |   |   |   |   |   |   |   |   |   |   |   |   |   |     |   |     |     |
| 328 | ---- | G   | S    | ----        | MTFSMFDELVD | AVKDL  | -GA-       | DCIMMRSEHL | RAYRALLRTV | --NVGPSE   | 196      |     |   |   |   |   |   |   |   |   |   |   |   |   |   |   |   |   |   |   |   |   |   |   |   |   |   |   |   |   |   |   |   |   |   |   |   |   |   |   |   |   |   |     |   |     |     |
| 329 | ---- | GAS | ---- | MTFSMFDELVD | AVKDL       | -GA-   | DCIMMRSEHL | RAYRALLRTV | --SLGPSE   | 196        |          |     |   |   |   |   |   |   |   |   |   |   |   |   |   |   |   |   |   |   |   |   |   |   |   |   |   |   |   |   |   |   |   |   |   |   |   |   |   |   |   |   |   |     |   |     |     |
| 330 | ---- | GAS | ---- | MTFSMFDELVD | AVKDL       | -GA-   | DCIMMRSEHL | RAYRALLRTV | --SLGPSE   | 196        |          |     |   |   |   |   |   |   |   |   |   |   |   |   |   |   |   |   |   |   |   |   |   |   |   |   |   |   |   |   |   |   |   |   |   |   |   |   |   |   |   |   |   |     |   |     |     |
| 331 | ---- | GAS | ---- | MTFSMFDELVD | AVKDL       | -GA-   | DCIMMRSEHL | RAYRALLRTV | --NVGPSE   | 196        |          |     |   |   |   |   |   |   |   |   |   |   |   |   |   |   |   |   |   |   |   |   |   |   |   |   |   |   |   |   |   |   |   |   |   |   |   |   |   |   |   |   |   |     |   |     |     |
| 332 | ---- | GAS | ---- | MTFSMFDELVD | AVKDL       | -GA-   | DCIMMRSEHL | RAYRALLRTV | --SLGPSE   | 196        |          |     |   |   |   |   |   |   |   |   |   |   |   |   |   |   |   |   |   |   |   |   |   |   |   |   |   |   |   |   |   |   |   |   |   |   |   |   |   |   |   |   |   |     |   |     |     |
| 333 | ---- | GAS | ---- | MTFSMFDELVD | AVKDL       | -GA-   | DCIMMRSEHL | RAYRALLRTV | --SLGPSE   | 196        |          |     |   |   |   |   |   |   |   |   |   |   |   |   |   |   |   |   |   |   |   |   |   |   |   |   |   |   |   |   |   |   |   |   |   |   |   |   |   |   |   |   |   |     |   |     |     |
| 334 | ---- | KAS | ---- | MTFSMFDELVD | AVKDL       | -GA-   | DCIMMRSEHL | RAYRALLRTV | --NVGPSE   | 196        |          |     |   |   |   |   |   |   |   |   |   |   |   |   |   |   |   |   |   |   |   |   |   |   |   |   |   |   |   |   |   |   |   |   |   |   |   |   |   |   |   |   |   |     |   |     |     |
| 335 | ---- | GAS | ---- | MTFSMFDELVD | AVKDL       | -GA-   | DCIMMRSEHL | RAYRALLRTV | --SLGPSE   | 196        |          |     |   |   |   |   |   |   |   |   |   |   |   |   |   |   |   |   |   |   |   |   |   |   |   |   |   |   |   |   |   |   |   |   |   |   |   |   |   |   |   |   |   |     |   |     |     |
| 336 | ---- | GAS | ---- | MTFSMFDELVD | AVKDL       | -GA-   | DCIMMRSEHL | RAYRALLRTV | --NVGPSE   | 196        |          |     |   |   |   |   |   |   |   |   |   |   |   |   |   |   |   |   |   |   |   |   |   |   |   |   |   |   |   |   |   |   |   |   |   |   |   |   |   |   |   |   |   |     |   |     |     |
| 337 | ---- | GAS | ---- | MTFSMFDELVD | AVKDL       | -GA-   | DCIMMRSEHL | RAYRALLRTV | --SLGPSE   | 196        |          |     |   |   |   |   |   |   |   |   |   |   |   |   |   |   |   |   |   |   |   |   |   |   |   |   |   |   |   |   |   |   |   |   |   |   |   |   |   |   |   |   |   |     |   |     |     |
| 338 | ---- | GAS | ---- | MTFSMFDELVD | AVKDL       | -GA-   | DCIMMRSEHL | RAYRALLRTV | --NVGPSE   | 196        |          |     |   |   |   |   |   |   |   |   |   |   |   |   |   |   |   |   |   |   |   |   |   |   |   |   |   |   |   |   |   |   |   |   |   |   |   |   |   |   |   |   |   |     |   |     |     |
| 339 | ---- | GAS | ---- | MTFSMFDELVD | AVKDL       | -GA-   | DCIMMRSEHL | RAYRALLRTV | --NIGPSE   | 196        |          |     |   |   |   |   |   |   |   |   |   |   |   |   |   |   |   |   |   |   |   |   |   |   |   |   |   |   |   |   |   |   |   |   |   |   |   |   |   |   |   |   |   |     |   |     |     |
| 340 | ---- | GAS | ---- | MTFSMFDELVD | AVKDL       | -GA-   | DCIMMRSEHL | RAYRALLRTV | --NVGPSE   | 196        |          |     |   |   |   |   |   |   |   |   |   |   |   |   |   |   |   |   |   |   |   |   |   |   |   |   |   |   |   |   |   |   |   |   |   |   |   |   |   |   |   |   |   |     |   |     |     |
| 341 | ---- | GAS | ---- | MTFSMFDELVD | AVKDL       | -GA-   | DCIMMRSEHL | RAYRALLRTV | --SLGPSE   | 196        |          |     |   |   |   |   |   |   |   |   |   |   |   |   |   |   |   |   |   |   |   |   |   |   |   |   |   |   |   |   |   |   |   |   |   |   |   |   |   |   |   |   |   |     |   |     |     |
| 342 | ---- | GAS | ---- | MTFSMFDELVD | AVKDL       | -GA-   | DCIMMRSEHL | RAYRALLRTV | --NVGPSE   | 196        |          |     |   |   |   |   |   |   |   |   |   |   |   |   |   |   |   |   |   |   |   |   |   |   |   |   |   |   |   |   |   |   |   |   |   |   |   |   |   |   |   |   |   |     |   |     |     |
| 343 | ---- | GAS | ---- | MTFSMFDELVD | AVKDL       | -GA-   | DCIMMRSEHL | RAYRALLRTV | --SLGPSE   | 196        |          |     |   |   |   |   |   |   |   |   |   |   |   |   |   |   |   |   |   |   |   |   |   |   |   |   |   |   |   |   |   |   |   |   |   |   |   |   |   |   |   |   |   |     |   |     |     |
| 344 | ---- | GAS | ---- | MTFSMFDELVD | AVKDL       | -GA-   | DCIMMRSEHL | RAYRALLRTV | --SLGPSE   | 196        |          |     |   |   |   |   |   |   |   |   |   |   |   |   |   |   |   |   |   |   |   |   |   |   |   |   |   |   |   |   |   |   |   |   |   |   |   |   |   |   |   |   |   |     |   |     |     |
| 345 | ---- | GAS | ---- | MTFSMFDELVD | AVKDL       | -GA-   | DCIMMRSEHL | RAYRALLRTV | --NVGPSE   | 196        |          |     |   |   |   |   |   |   |   |   |   |   |   |   |   |   |   |   |   |   |   |   |   |   |   |   |   |   |   |   |   |   |   |   |   |   |   |   |   |   |   |   |   |     |   |     |     |
| 346 | ---- | GAS | ---- | MTFSMFDELVD | AVKDL       | -GA-   | DCIMMRSEHL | RAYRALLRTV | --NVGPSE   | 196        |          |     |   |   |   |   |   |   |   |   |   |   |   |   |   |   |   |   |   |   |   |   |   |   |   |   |   |   |   |   |   |   |   |   |   |   |   |   |   |   |   |   |   |     |   |     |     |
| 347 | ---- | GAS | ---- | MTFSMFDELVD | AVKDL       | -GA-   | DCIMMRSEHL | RAYRALLRTV | --NVGPSE   | 196        |          |     |   |   |   |   |   |   |   |   |   |   |   |   |   |   |   |   |   |   |   |   |   |   |   |   |   |   |   |   |   |   |   |   |   |   |   |   |   |   |   |   |   |     |   |     |     |
| 348 | ---- | KAS | ---- | MTFSMFDELVD | A           | I      | KDL        | -GA-       | DCIMMRSEHL | RAYRALLRTV | --NVGPSE | 196 |   |   |   |   |   |   |   |   |   |   |   |   |   |   |   |   |   |   |   |   |   |   |   |   |   |   |   |   |   |   |   |   |   |   |   |   |   |   |   |   |   |     |   |     |     |
| 349 | ---- | GAS | ---- | MTFSMFDELVD | AVKDL       | -GA-   | DCIMMRSEHL | RAYRALLRTV | --NIGPSE   | 196        |          |     |   |   |   |   |   |   |   |   |   |   |   |   |   |   |   |   |   |   |   |   |   |   |   |   |   |   |   |   |   |   |   |   |   |   |   |   |   |   |   |   |   |     |   |     |     |
| 350 | ---- | GAS | ---- | MTFSMFDELVD | AVKDL       | -GA-   | DCIMMRSEHL | RAYRALLRTV | --SLGPSE   | 196        |          |     |   |   |   |   |   |   |   |   |   |   |   |   |   |   |   |   |   |   |   |   |   |   |   |   |   |   |   |   |   |   |   |   |   |   |   |   |   |   |   |   |   |     |   |     |     |
| 351 | ---  | D   | G    | N           | P           | ----   | L          | T          | L          | T          | M        | L   | D | E | L | C | D | A | V | P | N | - | G | A | - | D | V | I | V | M | R | R | G | T | I | R | A | Y | R | A | L | L | R | A | T | - | Y | G | T | D | A | V | M | 179 |   |     |     |
| 352 | ---- | GAS | ---- | MTFSMFDELVD | AVKDL       | -GA-   | DCIMMRSEHL | RAYRALLRTV | --SLGPSE   | 196        |          |     |   |   |   |   |   |   |   |   |   |   |   |   |   |   |   |   |   |   |   |   |   |   |   |   |   |   |   |   |   |   |   |   |   |   |   |   |   |   |   |   |   |     |   |     |     |
| 353 | --   | A   | D    | -           | G           | D      | A          | ----       | L          | S          | F        | G   | L | L | D | E | L | L | D | K | V | D | D | K | D | G | E | V | D | Y | I | L | M | N | S | R | T | L | R | S | Y | L | G | L | L | R | G | L | - | G | G | A | S | I   | G | D   | 202 |
| 354 | ---- | GAS | ---- | MTFSMFDELVD | AVKDL       | -GA-   | DCIMMRSEHL | RAYRALLRTV | --NVGPSE   | 193        |          |     |   |   |   |   |   |   |   |   |   |   |   |   |   |   |   |   |   |   |   |   |   |   |   |   |   |   |   |   |   |   |   |   |   |   |   |   |   |   |   |   |   |     |   |     |     |
| 355 | ---- | KAS | ---- | MTFSMFDELVD | AVKDL       | -GA-   | DCIMMRSEHL | RAYRALLRTV | --NVGPSE   | 196        |          |     |   |   |   |   |   |   |   |   |   |   |   |   |   |   |   |   |   |   |   |   |   |   |   |   |   |   |   |   |   |   |   |   |   |   |   |   |   |   |   |   |   |     |   |     |     |
| 356 | ---- | GAS | ---- | MTFSMFDELVD | AVKDL       | -GA-   | DCIMMRSEHL | RAYRALLRTV | --SLGPSE   | 196        |          |     |   |   |   |   |   |   |   |   |   |   |   |   |   |   |   |   |   |   |   |   |   |   |   |   |   |   |   |   |   |   |   |   |   |   |   |   |   |   |   |   |   |     |   |     |     |
| 357 | ---- | GAS | ---- | MTFSMFDELVD | AVKDL       | -GA-   | DCIMMRSEHL | RAYRALLRTV | --NVGPSE   | 196        |          |     |   |   |   |   |   |   |   |   |   |   |   |   |   |   |   |   |   |   |   |   |   |   |   |   |   |   |   |   |   |   |   |   |   |   |   |   |   |   |   |   |   |     |   |     |     |
| 358 | ---- | GAS | ---- | MTFSMFDELVD | AVKDL       | -GA-   | DCIMMRSEHL | RAYRALLRTV | --NIGPSE   | 196        |          |     |   |   |   |   |   |   |   |   |   |   |   |   |   |   |   |   |   |   |   |   |   |   |   |   |   |   |   |   |   |   |   |   |   |   |   |   |   |   |   |   |   |     |   |     |     |
| 359 | ---- | GAS | ---- | MTFSMFDELVD | AVKDL       | -GA-   | DCIMMRSEHL | RAYRALLRTV | --NVGPSE   | 196        |          |     |   |   |   |   |   |   |   |   |   |   |   |   |   |   |   |   |   |   |   |   |   |   |   |   |   |   |   |   |   |   |   |   |   |   |   |   |   |   |   |   |   |     |   |     |     |
| 360 | ---- | GAS | ---- | MTFSMFDELVD | AVKDL       | -GA-   | DCIMMRSEHL | RAYRALLRTV | --SLGPSE   | 196        |          |     |   |   |   |   |   |   |   |   |   |   |   |   |   |   |   |   |   |   |   |   |   |   |   |   |   |   |   |   |   |   |   |   |   |   |   |   |   |   |   |   |   |     |   |     |     |
| 361 | ---- | KAA | ---- | MTFSMFDELVD | AVKDL       | -GA-   | DCIMMRSEHL | RAYRALLRTV | --NVGPSE   | 196        |          |     |   |   |   |   |   |   |   |   |   |   |   |   |   |   |   |   |   |   |   |   |   |   |   |   |   |   |   |   |   |   |   |   |   |   |   |   |   |   |   |   |   |     |   |     |     |
| 362 | ---- | SAS | ---- | MTFSMFDELVD | AVKDL       | -GA-   | DCIMMRSEHL | RAYRALLRTV | --NVGPSE   | 196        |          |     |   |   |   |   |   |   |   |   |   |   |   |   |   |   |   |   |   |   |   |   |   |   |   |   |   |   |   |   |   |   |   |   |   |   |   |   |   |   |   |   |   |     |   |     |     |
| 363 | ---- | GAS | ---- | MTFSMFDELVD | AVKDL       | -GA-   | DCIMMRSEHL | RAYRALLRTV | --SLGPSE   | 196        |          |     |   |   |   |   |   |   |   |   |   |   |   |   |   |   |   |   |   |   |   |   |   |   |   |   |   |   |   |   |   |   |   |   |   |   |   |   |   |   |   |   |   |     |   |     |     |
| 364 | ---- | GAS | ---- | MTFSMFDELVD | AVKDL       | -GA-   | DCIMMRSEHL | RAYRALLRTV | --SLGPSE   | 196        |          |     |   |   |   |   |   |   |   |   |   |   |   |   |   |   |   |   |   |   |   |   |   |   |   |   |   |   |   |   |   |   |   |   |   |   |   |   |   |   |   |   |   |     |   |     |     |
| 365 | ---- | GAS | ---- | MTFSMFDELVD | AVKDL       | -GA-   | DCIMMRSEHL | RAYRALLRTV | --SLGPSE   | 196        |          |     |   |   |   |   |   |   |   |   |   |   |   |   |   |   |   |   |   |   |   |   |   |   |   |   |   |   |   |   |   |   |   |   |   |   |   |   |   |   |   |   |   |     |   |     |     |
| 366 | ---- | GAS | ---- | MTFSMFDELVD | AVKDL       | -GA-   | DCIMMRSEHL | RAYRALLRTV | --SLGPSE   | 196        |          |     |   |   |   |   |   |   |   |   |   |   |   |   |   |   |   |   |   |   |   |   |   |   |   |   |   |   |   |   |   |   |   |   |   |   |   |   |   |   |   |   |   |     |   |     |     |
| 367 | ---- | KAS | ---- | MTFSMFDELVD | AVKDL       | -GA-   | DCIMMRSEHL | RAYRALLRTV | --NVGPSE   | 196        |          |     |   |   |   |   |   |   |   |   |   |   |   |   |   |   |   |   |   |   |   |   |   |   |   |   |   |   |   |   |   |   |   |   |   |   |   |   |   |   |   |   |   |     |   |     |     |
| 368 | ---- | KAS | ---- | MTFSMFDELVD | A           | I      | KDL        | -GA-       | DCIMMRSEHL | RAYRALLRTV | --NVGPSE | 196 |   |   |   |   |   |   |   |   |   |   |   |   |   |   |   |   |   |   |   |   |   |   |   |   |   |   |   |   |   |   |   |   |   |   |   |   |   |   |   |   |   |     |   |     |     |
| 369 | ---- | GAS | ---- | MTFSMFDELVD | AVKDL       | -G     | T          | -          | DCIMMRSEHL | RAYRALLRTV | --SLGPSE | 196 |   |   |   |   |   |   |   |   |   |   |   |   |   |   |   |   |   |   |   |   |   |   |   |   |   |   |   |   |   |   |   |   |   |   |   |   |   |   |   |   |   |     |   |     |     |
| 370 | ---- | GAS | ---- | MTFSMFDELVD | AVKDL       | -GA-   | DCIMMRSEHL | RAYRALLRTV | --SLGPSE   | 196        |          |     |   |   |   |   |   |   |   |   |   |   |   |   |   |   |   |   |   |   |   |   |   |   |   |   |   |   |   |   |   |   |   |   |   |   |   |   |   |   |   |   |   |     |   |     |     |
| 371 | ---- | GAS | ---- | MTFSMFDELVD | AVKDL       | -GA-   | DCIMMRSEHL | RAYRALLRTV | --SLGPSE   | 196        |          |     |   |   |   |   |   |   |   |   |   |   |   |   |   |   |   |   |   |   |   |   |   |   |   |   |   |   |   |   |   |   |   |   |   |   |   |   |   |   |   |   |   |     |   |     |     |
| 372 | ---- | GAS | ---- | MTFSMFDELVD | AVKDL       | -GA-   | DCIMMRSEHL | RAYRALLRTV | --SLGPSE   | 196        |          |     |   |   |   |   |   |   |   |   |   |   |   |   |   |   |   |   |   |   |   |   |   |   |   |   |   |   |   |   |   |   |   |   |   |   |   |   |   |   |   |   |   |     |   |     |     |
| 373 | ---- | GAS | ---- | MTFSMFDELVD | AVKDL       | -GA-   | DCIMMRSEHL | RAYRALLRTV | --SLGPSE   | 196        |          |     |   |   |   |   |   |   |   |   |   |   |   |   |   |   |   |   |   |   |   |   |   |   |   |   |   |   |   |   |   |   |   |   |   |   |   |   |   |   |   |   |   |     |   |     |     |
| 374 | ---- | CAS | ---- | MTFSMFDELVD | AVKDL       | -GA-   | DCIMMRSEHL | RAYRALLRTV | --NVGPSE   | 196        |          |     |   |   |   |   |   |   |   |   |   |   |   |   |   |   |   |   |   |   |   |   |   |   |   |   |   |   |   |   |   |   |   |   |   |   |   |   |   |   |   |   |   |     |   |     |     |
| 375 | ---- | GAS | ---- | MTFSMFDELVD | AVKDL       | -GA-   | DCIMMRSEHL | RAYRALLRTV | --SLGPSE   | 196        |          |     |   |   |   |   |   |   |   |   |   |   |   |   |   |   |   |   |   |   |   |   |   |   |   |   |   |   |   |   |   |   |   |   |   |   |   |   |   |   |   |   |   |     |   |     |     |
| 376 | ---- | GAS | ---- | MTFSMFDELVD | AVKDL       | -GA-   | DCIMMRSEHL | RAYRALLRTV | --NVGPSE   | 196        |          |     |   |   |   |   |   |   |   |   |   |   |   |   |   |   |   |   |   |   |   |   |   |   |   |   |   |   |   |   |   |   |   |   |   |   |   |   |   |   |   |   |   |     |   |     |     |
| 377 | ---  | N   | -    | G           | G           | S      | ----       | L          | T          | L          | E        | L   | L | D | Q | L | V | D | L | V | K | P | - | G | K | P | D | A | L | L | M | S | K | R | T | R | K | L | S | Q | L | R | R | Q | S | - | G | T | V | L | E | S | D | 199 |   |     |     |
| 378 | ---- | GAS | ---- | MTFFMFDELVD | AVKDL       | -GA-   | DCIMMRSEHL | RAYRALLRTV | --SLGPSE   | 196        |          |     |   |   |   |   |   |   |   |   |   |   |   |   |   |   |   |   |   |   |   |   |   |   |   |   |   |   |   |   |   |   |   |   |   |   |   |   |   |   |   |   |   |     |   |     |     |
| 379 | ---- | GAS | ---- | MTFSMFDELVD | AVKDL       | -GA-   | DCIMMRSEHL | RAYRALLRTV | --SLGPSE   | 196        |          |     |   |   |   |   |   |   |   |   |   |   |   |   |   |   |   |   |   |   |   |   |   |   |   |   |   |   |   |   |   |   |   |   |   |   |   |   |   |   |   |   |   |     |   |     |     |
| 380 | ---- | KAS | ---- | MTFSMFDELVD | A           | I      | KDL        | -GA-       | DCIMMRSEHL | RAYRALLRTV | --NVGPSE | 196 |   |   |   |   |   |   |   |   |   |   |   |   |   |   |   |   |   |   |   |   |   |   |   |   |   |   |   |   |   |   |   |   |   |   |   |   |   |   |   |   |   |     |   |     |     |
| 381 | ---- | KAS | ---- | MTFSMFDELVD | A           | I      | KDL        | -GA-       | DCIMMRSEHL | RAYRALLRTV | --NVGPSE | 196 |   |   |   |   |   |   |   |   |   |   |   |   |   |   |   |   |   |   |   |   |   |   |   |   |   |   |   |   |   |   |   |   |   |   |   |   |   |   |   |   |   |     |   |     |     |
| 382 | ---  | N   | -    | G           | S           | N      | ----       | L          | S          | F          | E        | I   | L | D | E | M | L | D | L | V | T | A | K | D | G | E | V | D | Y | L | V | M | H | A | R | T | I | R | S | Y | K | T | L | L | R | A | L | - | G | G | V | T | M | Q   | E | 201 |     |
| 383 | ---- | KAS | ---- | MTFSMFDELVD | A           | I      | KDL        | -GA-       | DCIMMRSEHL | RAYRALLRTV | --NVGPSE | 196 |   |   |   |   |   |   |   |   |   |   |   |   |   |   |   |   |   |   |   |   |   |   |   |   |   |   |   |   |   |   |   |   |   |   |   |   |   |   |   |   |   |     |   |     |     |
| 384 | ---- | KAS | ---- | MTFSMFDELVD | A           | I      | KDL        | -GA-       | DCIMMRSEHL | RAYRALLRTV | --NVGPSE | 196 |   |   |   |   |   |   |   |   |   |   |   |   |   |   |   |   |   |   |   |   |   |   |   |   |   |   |   |   |   |   |   |   |   |   |   |   |   |   |   |   |   |     |   |     |     |

|     |       |       |      |             |           |            |              |                |                  |           |          |     |
|-----|-------|-------|------|-------------|-----------|------------|--------------|----------------|------------------|-----------|----------|-----|
| 385 | ----  | GAS   | ---- | MTFSMFDELVD | AVKDL     | -GA-       | DCIMMRSEHL   | RAYRALLRTV     | --SLGPSE         | 196       |          |     |
| 386 | ----  | GAS   | ---- | MTFSMFDELVD | AVKDL     | -GA-       | DCIMMRSEHL   | RAYRALLRTV     | --NVGPSE         | 196       |          |     |
| 387 | ---   | GPTNN | ---- | LTFSML      | DDLVD     | RVPN-      | -GA-         | DAIMMHSSTLR    | YYRALCRAQ        | -NGTDAAQ  | 200      |     |
| 388 | ----  | KAS   | ---- | MTFSMFDELVD | AIKDL     | -GA-       | DCIMMRSEHL   | RAYRALLRTV     | --NVGPSE         | 196       |          |     |
| 389 | ----  | DAS   | ---- | MTFSMFDELVD | AVKDL     | -GA-       | DCIMMRSEHL   | RAYRALLRTV     | --NVGPSE         | 196       |          |     |
| 390 | ---   | T     | GKN  | ----        | LG        | FEDLDTLLHL | VVSKD        | GQVDYMLFPARTI  | RSFKALLRGL       | -GGASVNE  | 201      |     |
| 391 | ----  | KAS   | ---- | MTFSMFDELVD | AIKDL     | -GA-       | DCIMMRSEHL   | RAYRALLRTV     | --NVGPSE         | 196       |          |     |
| 392 | ----  | GAS   | ---- | MTFSMFDELVD | AVKDL     | -GA-       | DCIMMRSEHL   | RAYRALLRTV     | --SLGPSE         | 196       |          |     |
| 393 | ----  | GAS   | ---- | MTFSMFDELVD | AVKDL     | -GA-       | DCIMMRSEHL   | RAYRALLRTV     | --SLGPSE         | 196       |          |     |
| 394 | ----  | KAS   | ---- | MTFSMFDELVD | AIKDL     | -GA-       | DCIMMRSEHL   | RAYRALLRTV     | --NVGPSE         | 196       |          |     |
| 395 | ----  | KAS   | ---- | MTFSMFDELVD | AIKDL     | -GA-       | DCIMMRSEHL   | RAYRALLRTV     | --NVGPSE         | 196       |          |     |
| 396 | ----  | AAS   | ---- | MTFSMFDELVD | AVKDL     | -GA-       | DCIMMRSEHL   | RAYRALLRTV     | --NVGPSE         | 196       |          |     |
| 397 | GAAN- | GAV   | ---- | LS          | FEDLDALID | LVTDKD     | GQVDYLMHGRTR | RKYLALLRSL     | -GGTSPAD         | 205       |          |     |
| 398 | ----  | GAS   | ---- | MTFSMFDELVD | AVKDL     | -GA-       | DCIMMRSEHL   | RAYRALLRTV     | --NVGPSE         | 196       |          |     |
| 399 | ----  | NAS   | ---- | ITFSMFDELVD | AVKDL     | -GA-       | DCIMMRSEHL   | RAYRALLRTV     | --NVGPSE         | 196       |          |     |
| 400 | ----  | KAS   | ---- | MTFSMFDELVD | AIKDL     | -GA-       | DCIMMRSEHL   | RAYRALLRTV     | --NVGPSE         | 196       |          |     |
| 401 | ----  | KAS   | ---- | MTFSMFDELVD | AIKDL     | -GA-       | DCIMMRSEHL   | RAYRALLRTV     | --NVGPSE         | 196       |          |     |
| 402 | ----  | KAS   | ---- | MTFSMFDELVD | AIKDL     | -GA-       | DCIMMRSEHL   | RAYRALLRTV     | --NVGPSE         | 196       |          |     |
| 403 | ----  | GAS   | ---- | MTFSMFDELVD | AVKDL     | -GA-       | DCIMMRSEHL   | RAYRALLRTV     | --NVGPSE         | 196       |          |     |
| 404 | ----  | GAS   | ---- | MTFSMFDELVD | AVKDL     | -GA-       | DCIMMRSEHL   | RAYRALLRTV     | --NVGPSE         | 196       |          |     |
| 405 | ----  | GAS   | ---- | MTFSMFDELVD | AVKDL     | -GA-       | DCIMMRSEHL   | RAYRALLRTV     | --NVGPSE         | 196       |          |     |
| 406 | ----  | KAS   | ---- | MTFSMFDELVD | AIKDL     | -GA-       | DCIMMRSEHL   | RAYRALLRTV     | --NVGPSE         | 196       |          |     |
| 407 | ----  | SAS   | ---- | MTFSMFDELVD | AVKDL     | -GA-       | DCIMMRSEHL   | RAYRALLRTV     | --NVGPSE         | 196       |          |     |
| 408 | ----  | GAS   | ---- | MTFSMFDELVD | AVKDL     | -GA-       | DCIMMRSEHL   | RAYRALLRTV     | --SLGPSE         | 196       |          |     |
| 409 | ----  | KAS   | ---- | MTFSMFDELVD | AIKDL     | -GA-       | DCIMMRSEHL   | RAYRALLRTV     | --NVGPSE         | 196       |          |     |
| 410 | ----  | KAS   | ---- | MTFSMFDELVD | AIKDL     | -GA-       | DCIMMRSEHL   | RAYRALLRTV     | --NVGPSE         | 196       |          |     |
| 411 | ----  | KAS   | ---- | MTFSMFDELVD | AIKDL     | -GA-       | DCIMMRSEHL   | RAYRALLRTV     | --NVGPSE         | 196       |          |     |
| 412 | ----  | KAS   | ---- | MTFSMFDELVD | AIKDL     | -GA-       | DCIMMRSEHL   | RAYRALLRTV     | --NVGPSE         | 196       |          |     |
| 413 | ----  | GAS   | ---- | MTFSMFDELVD | AVKDL     | -GA-       | DCIMMRSEHL   | RAYRALLRTV     | --NVGPSE         | 196       |          |     |
| 414 | ----  | KAS   | ---- | MTFSMFDELVD | AIKDL     | -GA-       | DCIMMRSEHL   | RAYRALLRTV     | --NVGPSE         | 196       |          |     |
| 415 | ----  | KAS   | ---- | MTFSMFDELVD | AIKDL     | -GA-       | DCIMMRSEHL   | RAYRALLRTV     | --NVGPSE         | 196       |          |     |
| 416 | ----  | KAS   | ---- | MTFSMFDELVD | AIKDL     | -GA-       | DCIMMRSEHL   | RAYRALLRTV     | --NVGPSE         | 196       |          |     |
| 417 | ----  | AAS   | ---- | MTFSMFDELVD | AVKDL     | -GA-       | DCIMMRSEHL   | RAYRALLRTV     | --NVGPSE         | 196       |          |     |
| 418 | ----  | GAS   | ---- | MTFSMFDELVD | AVKDL     | -GA-       | DCIMMRSEHL   | RAYRALLRTV     | --SLGPSE         | 196       |          |     |
| 419 | ---   | D     | GNP  | ----        | ISYAAL    | DELKDMVKL  | -GA-         | DVFMMSRSGTWRAI | RELNR            | IHGGNTAET | 198      |     |
| 420 | ----  | KAS   | ---- | MTFSMFDELVD | AIKDL     | -GA-       | DCIMMRSEHL   | RAYRALLRTV     | --NVGPSE         | 196       |          |     |
| 421 | ----  | GAS   | ---- | MTFSMFDELVD | AVKDL     | -GA-       | DCIMMRSEHL   | RAYRALLRTV     | --NVGPSE         | 196       |          |     |
| 422 | ----  | GAS   | ---- | MTFSMFDELVD | AVKDL     | -GA-       | DCIMMRSEHL   | RAYRALLRTV     | --NVGPSE         | 196       |          |     |
| 423 | ----  | AAS   | ---- | MTFSMFDELVD | AVKDL     | -GA-       | DCIMMRSEHL   | RAYRALLRTV     | --NVGPSE         | 196       |          |     |
| 424 | ----  | KAS   | ---- | MTFSMFDELVD | AIKDL     | -GA-       | DCIMMRSEHL   | RAYRALLRTV     | --NVGPSE         | 196       |          |     |
| 425 | ----  | GAS   | ---- | MTFSMFDELVD | AVKDL     | -GA-       | DCIMMRSEHL   | RAYRALLRTV     | --NVGPSE         | 196       |          |     |
| 426 | ----  | GAS   | ---- | MTFSMFDELVD | AVKDL     | -GA-       | DCIMMRSEHL   | RAYRALLRTV     | --NVGPSE         | 196       |          |     |
| 427 | ----  | GAS   | ---- | MTFSMFDELVD | AVKDL     | -GA-       | DCIMMRSEHL   | RAYRALLRTV     | --NVGPSE         | 196       |          |     |
| 428 | ----  | KAS   | ---- | MTFSMFDELVD | AIKDL     | -GA-       | DCIMMRSEHL   | RAYRALLRTV     | --NVGPSE         | 196       |          |     |
| 429 | ----  | GAS   | ---- | MTFSMFDELVD | AVKDL     | -GA-       | DCIMMRSEHL   | RAYRALLRTV     | --NVGPSE         | 196       |          |     |
| 430 | ----  | GAS   | ---- | MTFSMFDELVD | AVKDL     | -GA-       | DCIMMRSEHL   | RAYRALLRTV     | --NVGPSE         | 196       |          |     |
| 431 | ----  | KAS   | ---- | MTFSMFDELVD | AIKDL     | -GA-       | DCIMMRSEHL   | RAYRALLRTV     | --NVGPSE         | 196       |          |     |
| 432 | ---   | N     | GGA  | ----        | LSFAFL    | DELLDL     | LVVDKD       | GNVDYITMHSRTI  | RSYKALIRAL       | -GGVTADD  | 201      |     |
| 433 | ----  | GAS   | ---- | MTFSMFDELVD | AVKDL     | -GA-       | DCIMMRSEHL   | RAYRALLRTV     | --NVGPSE         | 196       |          |     |
| 434 | ----  | GAS   | ---- | MTFSMFDELVD | AVKDL     | -GA-       | DCIMMRSEHL   | RAYRALLRTV     | --NVGPSE         | 196       |          |     |
| 435 | ----  | GAS   | ---- | MTFSMFDELVD | AVKDL     | -GA-       | DCIMMRSEHL   | RAYRALLRTV     | --NVGPSE         | 196       |          |     |
| 436 | ----  | KAS   | ---- | MTFSMFDELVD | AIKDL     | -GA-       | DCIMMRSEHL   | RAYRALLRTV     | --NVGPSE         | 196       |          |     |
| 437 | ----  | GAS   | ---- | MTFSMFDELVD | AVKDL     | -GA-       | DCIMMRSEHL   | RAYRALLRTV     | --SVGPSE         | 196       |          |     |
| 438 | ----  | KAS   | ---- | MTFSMFDELVD | AIKDL     | -GA-       | DCIMMRSEHL   | RAYRALLRTV     | --NVGPSE         | 196       |          |     |
| 439 | ----  | ASA   | ---- | LN          | FAMLD     | ELLDKVPN-  | -GA-         | DVLVMNRPTIRAYR | QILRAT           | -SGTDAVM  | 196      |     |
| 440 | ----  | GVS   | ---- | MTFSMFDELVD | AVKDL     | -GA-       | DCIMMRSEHL   | RAYRALLRTV     | --NVGPSE         | 196       |          |     |
| 441 | ---   | N     | GGG  | ----        | LTLELLD   | QLVDLVKP-  | -GKPD        | ALLMSKRTRRKLS  | QLRRQS           | -GTVLESD  | 199      |     |
| 442 | ----  | NSA   | ---- | MTFSML      | DELVD     | AVKDL      | -GA-         | DAIMMRSEH      | IRAYRALLRTV      | --NVGPQ   | 195      |     |
| 443 | ----  | GAS   | ---- | MTFSMFDELVD | AVKDL     | -GA-       | DCIMMRSEHL   | RAYRALLRTV     | --SLGPSE         | 196       |          |     |
| 444 | ---   | N     | GAD  | ----        | VSFSL     | LLDELLDAV  | KAKD         | GKVDFLMMHARTI  | RSVKTLLRGQ       | -SGAGIIE  | 201      |     |
| 445 | ---   | N     | GGA  | ----        | LSFEWL    | DNLLDL     | LVVSKD       | GDVDYLI        | MHARTRRSYKTLLRAL | -GGVPMEE  | 201      |     |
| 446 | ----  | GAS   | ---- | MTFSMFDELVD | AVKDL     | -GA-       | DCIMMRSEHL   | RAYRALLRTV     | --NVGPSE         | 196       |          |     |
| 447 | ----  | GAS   | ---- | MTFSMFDELVD | AVKDL     | -GA-       | DCIMMRSEHL   | RAYRALLRTV     | --NVGPSE         | 196       |          |     |
| 448 | ---   | N     | GGG  | ----        | LTLDLMD   | QLIDL      | LVKP-        | -GKPD          | ALLMSKRTRRKLS    | ALRRAS    | -GNLLET  | 197 |
| 449 | ----  | GAS   | ---- | MTFSMFDELVD | AVKDL     | -GA-       | DCIMMRSEHL   | RAYRALLRTV     | --NVGPSE         | 196       |          |     |
| 450 | ----  | GAS   | ---- | MTFSMFDELVD | AVKDL     | -GA-       | DCIMMRSEHL   | RAYRALLRTV     | --NVGPSE         | 196       |          |     |
| 451 | ---   | N     | GGG  | ----        | LTLELLE   | QLIDL      | LVKP-        | -GKPD          | ALLMAKRTTRKLA    | QLRRSS    | -GSVLETE | 199 |

|     |      |     |     |        |         |         |         |       |        |       |         |        |        |        |        |        |      |     |     |
|-----|------|-----|-----|--------|---------|---------|---------|-------|--------|-------|---------|--------|--------|--------|--------|--------|------|-----|-----|
| 452 | ---  | D   | GGA | ---    | LTLDLMD | DELID   | LVRP    | ---   | GRP    | DALLM | HKRTRR  | KLSQL  | LRRTS  | ---    | GNLLET | TD     | 199  |     |     |
| 453 | ---  | KAS | --- | MTFSMF | DELVD   | AIKDL   | ---     | GA    | DCIMMR | SEHL  | RAYRALL | RTV    | ---    | NVGP   | SE     | 196    |      |     |     |
| 454 | GAAN | GAA | --- | LSFEDL | DALID   | LVTDKD  | ---     | GQV   | DYLM   | MHGRT | RRKY    | LALLR  | SL     | ---    | GGTSP  | AD     | 205  |     |     |
| 455 | ---  | N   | GAA | ---    | LTLSMM  | DELADQ  | VIN     | ---   | GA     | DAFIM | RP      | GTIRAY | RALLY  | AS     | ---    | GGIQ   | PAM  | 198 |     |
| 456 | ---  | GAS | --- | MTFSMF | DELVD   | AVKDL   | ---     | GA    | DCIMMR | SEHL  | RAYRALL | RTV    | ---    | NVGP   | SE     | 196    |      |     |     |
| 457 | ---  | GAS | --- | MTFSMF | DELVD   | AVKDL   | ---     | GA    | DCIMMR | SEHL  | RAYRALL | RTV    | ---    | NVGP   | SE     | 196    |      |     |     |
| 458 | ---  | KAS | --- | MTFSMF | DELVD   | AIKDL   | ---     | GA    | DCIMMR | SEHL  | RAYRALL | RTV    | ---    | NVGP   | SE     | 196    |      |     |     |
| 459 | ---  | N   | GAA | ---    | MTLGM   | LDQLID  | AVPN    | ---   | GA     | DFLM  | MRS     | GT     | RRAY   | TALV   | RAA    | ---    | GGNT | ASM | 198 |
| 460 | ---  | GAS | --- | MTFSMF | DELVD   | AVKDL   | ---     | GA    | DCIMMR | SEHL  | RAYRALL | RTV    | ---    | NVGP   | SE     | 196    |      |     |     |
| 461 | GAAN | GAG | --- | LSFEDL | DALID   | LVTDKD  | ---     | GQV   | DYLM   | MHSR  | TRRKY   | LALLR  | RAL    | ---    | GGTSP  | GD     | 205  |     |     |
| 462 | ---  | GAS | --- | MTFSMF | DELVD   | AVKDL   | ---     | GA    | DCIMMR | SEHL  | RAYRALL | RTV    | ---    | NVGP   | SE     | 196    |      |     |     |
| 463 | ---  | GAP | --- | LSFPCL | SKAWHL  | VKAN    | ---     | NGK   | PTVIM  | SNAR  | SLE     | SYEN   | LCRL   | ---    | S      | ---    | 107  |     |     |
| 464 | ---  | GAS | --- | MTFSMF | DELVD   | AVKDL   | ---     | GA    | DCIMMR | SEHL  | RAYRALL | RTV    | ---    | NVGP   | SE     | 196    |      |     |     |
| 465 | ---  | GVS | --- | MTFSMF | DELVD   | AVKDL   | ---     | GA    | DCIMMR | SEHL  | RAYRALL | RTV    | ---    | NVGP   | SE     | 196    |      |     |     |
| 466 | ---  | GAS | --- | MTFSMF | DELVD   | AVKDL   | ---     | GA    | DCIMMR | SEHL  | RAYRALL | RTV    | ---    | NVGP   | SE     | 196    |      |     |     |
| 467 | ---  | GAS | --- | MTFSMF | DELVD   | AVKDL   | ---     | GA    | DCIMMR | SEHL  | RAYRALL | RTV    | ---    | NVGP   | SE     | 196    |      |     |     |
| 468 | ---  | GAS | --- | MTFSMF | DELVD   | AVKDL   | ---     | GA    | DCIMMR | SEHL  | RAYRALL | RTV    | ---    | NVGP   | SE     | 196    |      |     |     |
| 469 | ---  | GAA | --- | ITFSMF | DELVD   | AVKDL   | ---     | GA    | DCIMMR | SEHL  | RAYRALL | RTM    | ---    | NAGPA  | E      | 195    |      |     |     |
| 470 | ---  | GAS | --- | MTFSMF | DELVD   | AVKDL   | ---     | GA    | DCIMMR | SEHL  | RAYRALL | RTV    | ---    | NVGP   | SE     | 196    |      |     |     |
| 471 | ---  | N   | GAA | ---    | LSFEKL  | DELMD   | TVTDKD  | ---   | GEV    | DYLT  | MHARS   | LRSF   | NALL   | RGL    | ---    | GGAS   | IGD  | 202 |     |
| 472 | ---  | N   | GNP | ---    | LTLT    | MMDEL   | CDAV    | PN    | ---    | GA    | DVLV    | MRRGT  | IRAY   | RALL   | RAT    | ---    | YGTD | AVM | 208 |
| 473 | ---  | N   | GAA | ---    | LSFEKL  | DELMD   | TVTDKD  | ---   | GEV    | DYLT  | MHARS   | LRSF   | NALL   | RGL    | ---    | GGAS   | IGD  | 202 |     |
| 474 | ---  | GAS | --- | MTFSMF | DELVD   | AVKDL   | ---     | GA    | DCIMMR | SEHL  | RAYRALL | RTV    | ---    | NVGP   | SE     | 196    |      |     |     |
| 475 | ---  | GAS | --- | MTFSMF | DELVD   | AVKDL   | ---     | GA    | DCIMMR | SEHL  | RAYRALL | RTV    | ---    | NVGP   | SE     | 196    |      |     |     |
| 476 | GAAN | GAA | --- | LSFEDL | DALID   | LVTDKD  | ---     | GQV   | DYLM   | MHSR  | TRRKY   | LALLR  | RAL    | ---    | GGTSP  | GD     | 205  |     |     |
| 477 | ---  | N   | GSA | ---    | LQFELL  | DELID   | SVKDKD  | ---   | GQV    | DYI   | LASAR   | TIRSY  | YALL   | RGL    | ---    | GGAT   | IGD  | 201 |     |
| 478 | ---  | N   | GAT | ---    | LSFELL  | DELL    | DRV     | TAKD  | ---    | GKV   | DFLM    | MHGRT  | IRSL   | KALL   | RQA    | ---    | GGAG | I   | 201 |
| 479 | GAAN | GAA | --- | LSFEDL | DALID   | LVTDKD  | ---     | GQV   | DYI    | MHGRT | TRRKY   | LALLR  | RAL    | ---    | GGTSP  | GD     | 205  |     |     |
| 480 | ---  | N   | GSA | ---    | LSFEIL  | DELMD   | LVVDKD  | ---   | GQV    | DYLT  | MHART   | LRSY   | NALL   | RSL    | ---    | GGAS   | IGD  | 202 |     |
| 481 | ---  | GVS | --- | MTFSMF | DELVD   | AVKDL   | ---     | GA    | DCIMMR | SEHL  | RAYRALL | RTV    | ---    | NVGP   | SE     | 196    |      |     |     |
| 482 | ---  | GVS | --- | MTFSMF | DELVD   | AVKDL   | ---     | GA    | DCIMMR | SEHL  | RAYRALL | RTV    | ---    | NVGP   | SE     | 196    |      |     |     |
| 483 | ---  | DSA | --- | MTFSM  | LDEL    | VDAVKDL | ---     | GA    | DAIMMR | SEHL  | RAYRALL | RTV    | ---    | NVGP   | Q      | 195    |      |     |     |
| 484 | ---  | GVS | --- | MTFSMF | DELVD   | AVKDL   | ---     | GA    | DCIMMR | SEHL  | RAYRALL | RTV    | ---    | NVGP   | SE     | 196    |      |     |     |
| 485 | ---  | D   | GGA | ---    | LTLDLMD | DELID   | LVRP    | ---   | GRP    | DALLM | HKRTRR  | KLSQL  | LRRTS  | ---    | GNLLET | TD     | 199  |     |     |
| 486 | ---  | DSA | --- | MTFSM  | LDEL    | VDAVKDL | ---     | GA    | DAIMMR | SEH   | IRAY    | RALL   | RTV    | ---    | NVGP   | Q      | 195  |     |     |
| 487 | ---  | KAS | --- | MTFSMF | DELVD   | AIKDL   | ---     | GA    | DCIMMR | SEHL  | RAYRALL | RTV    | ---    | NVGP   | SE     | 196    |      |     |     |
| 488 | ---  | DSA | --- | MTFSM  | LDEL    | VDAVKDL | ---     | GA    | DAIMMR | SEH   | IRAY    | RALL   | RTV    | ---    | NVGP   | TE     | 195  |     |     |
| 489 | ---  | DSA | --- | MTFSM  | LDEL    | VDAVKDL | ---     | GA    | DAIMMR | SEH   | IRAY    | RALL   | RTV    | ---    | NVGP   | Q      | 195  |     |     |
| 490 | GAAN | GAG | --- | LSFEDL | DALID   | LVTDKD  | ---     | GQV   | DYLM   | MHSR  | TRRKY   | LALLR  | RAL    | ---    | GGTSP  | GD     | 205  |     |     |
| 491 | ---  | GAS | --- | MTFSMF | DELVD   | AVKDL   | ---     | GA    | DCIMMR | SEHL  | RAYRALL | RTV    | ---    | NVGP   | SE     | 196    |      |     |     |
| 492 | ---  | N   | GGA | ---    | LSFEM   | LDELL   | DAVKAKD | ---   | GKV    | DFLM  | MHGRT   | IRSL   | KSL    | LLRG   | ---    | GGAG   | I    | 201 |     |
| 493 | ---  | GAS | --- | MTFSMF | DELVD   | AVKDL   | ---     | GA    | DCIMMR | SEHL  | RAYRALL | RTV    | ---    | NVGP   | SE     | 196    |      |     |     |
| 494 | ---  | N   | GG  | ---    | LTLDLMD | Q       | LIDLV   | KP    | ---    | GRP   | DALLM   | SKRSR  | RKLSA  | LLRR   | ---    | GNLLET | TD   | 199 |     |
| 495 | ---  | GAS | --- | MTFSMF | DELVD   | AVKDL   | ---     | GA    | DCIMMR | SEHL  | RAYRALL | RTV    | ---    | NVGP   | SE     | 196    |      |     |     |
| 496 | ---  | GAS | --- | MTFSMF | DELVD   | AVKDL   | ---     | GA    | DCIMMR | SEHL  | RAYRALL | RTV    | ---    | NVGP   | SE     | 196    |      |     |     |
| 497 | --   | DN  | GAN | ---    | LSFDQ   | L       | DQLIDY  | VKDKD | ---    | GQV   | DYMM    | M      | PARTIR | SFYALL | RQL    | ---    | GGAT | IND | 202 |
| 498 | ---  | GAS | --- | MTFSMF | DELVD   | AVKDL   | ---     | GA    | DCIMMR | SEHL  | RAYRALL | RTV    | ---    | NVGP   | SE     | 196    |      |     |     |
| 499 | ---  | DSA | --- | MTFSM  | LDEL    | VDAVKDL | ---     | GA    | DAIMMR | SEH   | IRAY    | RALL   | RTV    | ---    | NVGP   | TE     | 195  |     |     |
| 500 | GAAN | GAG | --- | LSFEDL | DALID   | LVTDKD  | ---     | GQV   | DYLM   | MHSR  | TRRKY   | LALLR  | RAL    | ---    | GGTSP  | GD     | 205  |     |     |

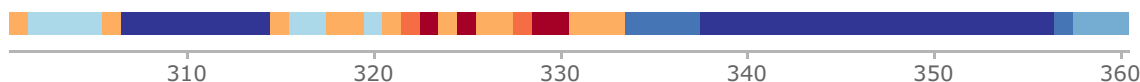

|    |     |     |   |      |     |     |   |     |    |     |   |      |     |     |     |     |     |    |    |     |
|----|-----|-----|---|------|-----|-----|---|-----|----|-----|---|------|-----|-----|-----|-----|-----|----|----|-----|
| 1  | --- | PVL | - | NGKS | --- | SFD | G | WKI | YI | NDF | - | QPTH | KIK | --- | --- | --- | --- | DK | DK | 221 |
| 2  | --- | PVL | - | NGKS | --- | SFD | G | WKI | YI | NDF | - | QPTH | KIK | --- | --- | --- | --- | DK | DK | 221 |
| 3  | --- | PVV | - | NGKS | --- | SFD | G | WKI | YI | NDF | - | QPTH | KIK | --- | --- | --- | --- | DK | DK | 221 |
| 4  | --- | PVL | - | NGKS | --- | SFD | G | WKI | YI | NDF | - | QPTH | KIK | --- | --- | --- | --- | DK | DK | 221 |
| 5  | --- | PVL | - | NGKS | --- | SFD | G | WKI | YI | NDF | - | QPTH | KIK | --- | --- | --- | --- | DK | DK | 221 |
| 6  | --- | TVV | - | NGKS | --- | SFD | G | WKI | YI | NDF | - | QPTH | KIK | --- | --- | --- | --- | DK | DK | 221 |
| 7  | --- | PVL | - | NGKS | --- | SFD | G | WKI | YI | NDF | - | QPIH | KI  | --- | --- | --- | --- | K  | DK | 219 |
| 8  | --- | PVI | - | DGKS | --- | SFD | G | WKI | YI | NDF | - | QPTH | CI  | --- | --- | --- | --- | K  | DK | 219 |
| 9  | --- | PVL | - | TGKS | --- | SFD | G | WKI | YI | NDF | - | QPIH | KI  | --- | --- | --- | --- | K  | DK | 219 |
| 10 | --- | PVV | - | DGKA | --- | SFD | G | WKI | YI | NDF | - | QPTH | CI  | --- | --- | --- | --- | K  | DK | 219 |
| 11 | --- | PVV | - | DGKS | --- | SFD | G | WKI | YI | NDF | - | QPTH | CI  | --- | --- | --- | --- | K  | DK | 219 |
| 12 | --- | PVV | - | NGKS | --- | SFD | G | WKI | YI | NDF | - | QPTH | KI  | --- | --- | --- | --- | K  | DK | 219 |

|    |                           |                          |                   |                                   |               |                |               |     |     |
|----|---------------------------|--------------------------|-------------------|-----------------------------------|---------------|----------------|---------------|-----|-----|
| 13 | -----PVI-DGKS-----SFDG    | WKIYI                    | NDF-QPTHCI-----   | KDK                               | 219           |                |               |     |     |
| 14 | -----PEV-NGHT-----VFDG    | WLIYI                    | NDM-QPLNCN-----   | DSE                               | 219           |                |               |     |     |
| 15 | EEMTFPGP-DGSSRMQQV        | LKFDG                    | APVYI             | NDLNQIYACDGSKPKDKLIPPEKALNLDGFDPS | 260           |                |               |     |     |
| 16 | EEMEFTCP-DGTIKFEHV        | LKFDG                    | APVYI             | NDLNQVYECGHNHVGAAISPENVLELNGMEPP  | 260           |                |               |     |     |
| 17 | EEMEFACP-DGTTKFEHV        | LKFDG                    | APVYI             | NDLNQVYECGHNHVGAAISPENVLELNGMEPP  | 260           |                |               |     |     |
| 18 | EEMEFTSP-DGTAKFEQV        | LKFDG                    | APVYI             | NDLNQIYECNDNNTGTPIPSEKISRINDNEPP  | 260           |                |               |     |     |
| 19 | TDMIFPCP-RNENQVERV        | LTVDG                    | APVYV             | NDLNQNLGSGSPDNPDGEPVHENPGELG--NSD | 257           |                |               |     |     |
| 20 | EEMAFPS-P-DGSSKMQQV       | LKFDG                    | APVYI             | NDLNQIYACDGSKPGKLIPPPKNALNLDGFDLP | 261           |                |               |     |     |
| 21 | TDMIFPCP-RNENQAEQV        | LTFDG                    | APVYV             | NDLNQNLGGSPDAPDGEVPENPLAPD--SAG   | 257           |                |               |     |     |
| 22 | TDMIFPCP-RNENQMERV        | LTFDG                    | APVYI             | NDLNQNLGSGSPDNPSGELVHENPQILG--SPG | 257           |                |               |     |     |
| 23 | TDMIFPCP-RNENQAEQV        | LTFDG                    | APVYV             | NDLNQNLGGSPDAPDGEVPENPLAPD--SAG   | 258           |                |               |     |     |
| 24 | TDMIFSCP-YNENQAEQV        | LTFDG                    | APVYV             | NDLNQNLGRSPDTPDGESIVENPLAFG--SAG  | 257           |                |               |     |     |
| 25 | TDMIFPCP-RNENHTERV        | LTVDG                    | APVYV             | NDLNQNLGSGSPDAPDGEVPENPLAPD--SAG  | 257           |                |               |     |     |
| 26 | TDMIFPCP-RNENQGERV        | LTVDG                    | APVYV             | NDLNQNLGSGSPDTPDGEPVHENPLASD--STG | 257           |                |               |     |     |
| 27 | EEMEFTCP-DGTTKFEHV        | LKFDG                    | APVYI             | NDLNQIFECSHNQVGAAIPPERVLALNGTEPP  | 260           |                |               |     |     |
| 28 | TDMIFSCP-YNENQAEQV        | LTFDG                    | APVYV             | NDLNQNLGRSPDTPDGESIVENPLAFG--SAG  | 257           |                |               |     |     |
| 29 | VTETWTDVPVKGRVSAP-IT      | CFNGT                    | TPWYI             | NDLI                              | IDDQAG-----   | 237            |               |     |     |
| 30 | VTETWTDVPVKGRVSAP-IT      | CFNGT                    | TPWYI             | NDLI                              | IDDQAG-----   | 243            |               |     |     |
| 31 | VKVARPDPIKGMVLEE-IAAFNGT  | TPWYI                    | NDLI              | IDDQAS-----                       | 239           |                |               |     |     |
| 32 | VKVARPDPIKGMVLEE-IAAFNGT  | TPWYI                    | NDLI              | IDDQAS-----                       | 239           |                |               |     |     |
| 33 | VKVPRTDPIKGIIVLEE-IASFNGT | TPWFI                    | NDLI              | IDDQAN-----                       | 239           |                |               |     |     |
| 34 | VDAEWTDPTKGTVRVPQI-AINGT  | TPVYV                    | NDMI              | IATVEDPGP-----                    | PAT           | 254            |               |     |     |
| 35 | TEMDWFDP                  | AQGR                     | TVKR              | LVPS                              | INGA          | PILIND         | MDVAT-DG----- | S   | 256 |
| 36 | -----PVI-DGKS-----SFDG    | WKIYI                    | NDF-QPTHCI-----   | KDK                               | 142           |                |               |     |     |
| 37 | VPYEWTDPIKGR              | LT                       | VQVA-SINGT        | PIFI                              | NDMI          | IAT-EDSDP----- | E             | 250 |     |
| 38 | VMDTWFDPIRGEITAG-ITSFKGT  | TPWYI                    | NDLI              | DDDLPG-----                       | 237           |                |               |     |     |
| 39 | VEFI-PLQ-DGPA--QKVMIDG    | CPILINDA-QPEHVLGGNP----- | 235               |                                   |               |                |               |     |     |
| 40 | VETEWGDPLKGTMRAPQI-AINGT  | TPVYI                    | NDWI              | IAT-----                          | DT            | 243            |               |     |     |
| 41 | -----NFEDW                | PICLND--QQPTCSACGVD----- | 218               |                                   |               |                |               |     |     |
| 42 | VLDTWMDPVLGEVTAP-ITAFNGT  | TPWYI                    | NDLI              | IDDEAG-----                       | 237           |                |               |     |     |
| 43 | VMDTWSDPIHGQITAP-ITAFNGT  | TPWYI                    | NDLI              | IDDQAG-----                       | 236           |                |               |     |     |
| 44 | VPASWMDPVLGEVTAP-ITAFNGT  | TPWYI                    | NDLI              | IDDQAG-----                       | 237           |                |               |     |     |
| 45 | VMDTWFDPIRGQVSAG-ITSFKGT  | TPWYI                    | NDLI              | DDDLPG-----                       | 237           |                |               |     |     |
| 46 | APFRWYNPASRRMEDGSVDAFNGT  | PWLANDLCNAAGAP-----      | G                 | 231                               |               |                |               |     |     |
| 47 | VPFRWYNPAIGGMQEGSVDALNGT  | PWLANDMLGS-----          | 227               |                                   |               |                |               |     |     |
| 48 | VPFMLYDPASRRMEDDAVDAFNGT  | PWLANDLCNADGL-----       | 229               |                                   |               |                |               |     |     |
| 49 | APFRWYNPASRRMEDGSVDAFNGT  | PWLANDLCNAAGTP-----      | G                 | 231                               |               |                |               |     |     |
| 50 | VPFMLYNPASRRMEDDVTDAFNGT  | PWLANDLCNAAGI-----       | 229               |                                   |               |                |               |     |     |
| 51 | EPWTWYHPDKRRMGPGSVDSFNGT  | PWLND                    | FINKSGLD-----     | 226                               |               |                |               |     |     |
| 52 | VPWTWYDPFKG-WQQGKVTSFHG   | VPWL                     | VNTKMNAAGLLP----- | 230                               |               |                |               |     |     |
| 53 | TIEMRIEDADGSTRVMPV        | LAWDGI                   | PVLVDDQVP         | PSDET-----                        | SNNY          | 245            |               |     |     |
| 54 | VEMEWIDPLTGGKKRQWM        | NAINGA                   | PILINDMI          | IET-DE-----                       | G             | 237            |               |     |     |
| 55 | FEVMELPAPGGGTRMVKVP       | CWDGI                    | PWVIDDNP          | PANEQP-----                       | GGTS          | 247            |               |     |     |
| 56 | VMETWTDVPVQGRMSAP-IT      | CFNGT                    | TPWYI             | NDLI                              | IDDQAG-----   | 237            |               |     |     |
| 57 | MPWQWYNPSLGRMEESLVTQFNGT  | PWLINGCMAGEASPK-----     | P                 | 231                               |               |                |               |     |     |
| 58 | VEMPFPDPISGGVKMVRVPAINGT  | PILVNDLI                 | IET-TSP-----      | G                                 | 241           |                |               |     |     |
| 59 | MKATTSEDVDGSRREI          | PGLAFDGI                 | PVVVDDLVP         | NDEG-----                         | SGSQ          | 245            |               |     |     |
| 60 | VQWRWYCPATRMWHDDWISAFRG   | VPWVIN                   | QEMNPGLLP-----    | 231                               |               |                |               |     |     |
| 61 | YEMMEIPVAGGGSRMIKVP       | CWDGVP                   | PWVIDDNP          | PNDEQP-----                       | SGTN          | 247            |               |     |     |
| 62 | AAFKWYNPASRRMEDGSVDAFNGT  | PWLANDLCNADGT-----       | 229               |                                   |               |                |               |     |     |
| 63 | MPWRWYDPLRG-WQVGKVTFHGV   | PWL                      | VNTKMNAAGLLA----- | 230                               |               |                |               |     |     |
| 64 | TVLMQVEDADGASRTVSALAFDGI  | PVVVDDQVP                | NNET-----         | SNSY                              | 245           |                |               |     |     |
| 65 | YMDWEVPRPGGGTRTVRT        | LCWEGVP                  | IVDDSV            | PNDEQP-----                       | GGTS          | 247            |               |     |     |
| 66 | SPWTWYYPAGKSSGPGSVDSFNGT  | PWLND                    | FINKDGH-----      | 226                               |               |                |               |     |     |
| 67 | VDFMWYDPVRRRMTPVKVTA      | FNGT                     | PWL               | VNDRMEGKTNP-----                  | A             | 233            |               |     |     |
| 68 | VAVVVPDG-NGGLKTVT         | MMHVNGWL                 | VMTDFVP           | PIEQFQ-----                       | GSTV          | 242            |               |     |     |
| 69 | VSAVPDG-NGGLKTIS          | MMHVNGWL                 | VSWTDFVP          | PIEQFQ-----                       | GSTV          | 258            |               |     |     |
| 70 | AEIEVPDPRTGTR-LARVPSIHG   | VPWYI                    | NDAMEVP           | PEGE-----                         | 240           |                |               |     |     |
| 71 | ADIEVPDPRTGTR-IARVPSIHG   | VPWYI                    | NDAMEVP           | PEGE-----                         | 291           |                |               |     |     |
| 72 | ADIEVPDPRTGTR-IARVPSIHG   | VPWYI                    | NDAMEVP           | PEGE-----                         | 286           |                |               |     |     |
| 73 | VEIDAPDPLTGTK-KQWVPSIHG   | VPWYI                    | NDAMEVP           | PEGE-----                         | 240           |                |               |     |     |
| 74 | VMIENF-----GRPMLCHNG      | VPI                      | IVND              | FLPLNEVQ-----                     | GSSS          | 232            |               |     |     |
| 75 | VPYRWYNPTVGGMQEGSVDAFNGT  | PWLANDMLGS-----          | 227               |                                   |               |                |               |     |     |
| 76 | VTETWTDVPVKGRVSAP-IT      | CFNGT                    | TPWYI             | NDLI                              | IDDQAG-----   | 172            |               |     |     |
| 77 | VPWRWYCPATGRWKDGVVPSFNGT  | PWVIN                    | DEMNP             | GVQP-----                         | 231           |                |               |     |     |
| 78 | ITVENF-----G-TV           | RAYDGT                   | PVI               | IND                               | FLPGDEVQ----- | GTEN           | 231           |     |     |
| 79 | VTETWTDVPVKGRVSAP-IT      | CFNGT                    | -----             | -----                             | 223           |                |               |     |     |



|     |                         |             |                  |              |       |      |     |
|-----|-------------------------|-------------|------------------|--------------|-------|------|-----|
| 80  | VMMENF                  | -----       | GRPMLTHNGVPIIV   | NDFLPSNEVQ   | ----- | GSSS | 232 |
| 81  | IMIENF                  | -----       | GRAVPGHNGIPII    | VNDFLPIDEVQ  | ----- | GTET | 233 |
| 82  | QQLENF                  | -----       | GRPMLTHNGIPIIL   | MNEFLPKNEVQ  | ----- | GASS | 232 |
| 83  | IQIPNF                  | -----       | GKPVPAYDGVPII    | INDFMTADEVQ  | ----- | GSAN | 232 |
| 84  | IQIPNF                  | -----       | GKPVPAYDGIPII    | INDFLTADAEVM | ----- | GSAN | 232 |
| 85  | IQIPNF                  | -----       | GKPVPAYDGIPII    | INDFLTADAEVM | ----- | GSAN | 232 |
| 86  | IMIPNF                  | -----       | GKPVPAYDGVPII    | INDFLTADAEVM | ----- | GSAN | 232 |
| 87  | VETHWADPVKGVV           | -RGKVISMYP  | TPWYI            | NAAMTTRPEGT  | ----- |      | 231 |
| 88  | VEMEWVDPLTGGKKRQW       | MNAINGAPILI | INDMIET-DG       | -----        | S     | 188  |     |
| 89  | IQIPNF                  | -----       | GKPVPAYDGIPII    | INDFLTADAEVM | ----- | GSAN | 232 |
| 90  | MMIKNF                  | -----       | GQAVPCYDGKPII    | INDFLPADEVQ  | ----- | GTAD | 232 |
| 91  | VPWRWYDPARGRMVEGSVDAFNG | TPWLAND     | DFVN-AGAD        | -----        | P     | 186  |     |
| 92  | VDAPWADPIRGVA           | -LGKVVSMYP  | TPWYI            | NGAMNTRPEGT  | ----- |      | 231 |
| 93  | VETQWADPIRGVV           | -PGKVVSVYP  | TPWYI            | NGAMTTRPEGT  | ----- |      | 231 |
| 94  | IMMENF                  | -----       | GRPMLTHNGVPIIL   | VNDFLNVAQ-D  | ----- | GEGK | 229 |
| 95  | IQIANF                  | -----       | GKPVPAYDGIPII    | INDFITADEVQ  | ----- | GSAN | 232 |
| 96  | QMLDNF                  | -----       | GRPMLTHNGVPII    | MNEFSPGTEDQ  | ----- | GTAT | 232 |
| 97  | IIVKDF                  | -----       | GKALPAFDGTPII    | INDFMTADEVQ  | ----- | GTNE | 232 |
| 98  | LQIENF                  | -----       | GM-MAHNDGIPII    | INDFIPVK-AQ  | ----- | GTTA | 232 |
| 99  | IMIPNF                  | -----       | GRPIPAFDGTPVI    | INDYMNADETQ  | ----- | GTAE | 232 |
| 100 | LQLDNF                  | -----       | GV-IPAHDGVPII    | INDFIPVK-AQ  | ----- | GTNA | 232 |
| 101 | VVQGEY                  | -----       | G-PIPAHNGVPII    | VNDFLPADEVQ  | ----- | GNSS | 232 |
| 102 | IECVKEDPILGPVRVKQL      | -CLYGT      | TPWYICDLIQARTVNS | -----        | Q     | 239  |     |
| 103 | LQLDNY                  | -----       | GQ-IPAHDGIPII    | INDFIPVK-AQ  | ----- | GTTA | 232 |
| 104 | QMVENF                  | -----       | GRPMLTHNGVPIVM   | NNEFLPADEVQ  | ----- | GTNT | 232 |
| 105 | QQLSNF                  | -----       | GRPMLTHNGIPII    | MNDWIAGDEVK  | ----- | GTNS | 232 |
| 106 | QQLSNF                  | -----       | GRPMLTHNGIPII    | MNDWIAGDEVK  | ----- | GTNS | 230 |
| 107 | QQGLNFD                 | -----       | GRPVLTHNGIPII    | MNEYLDGNENG  | ----- | N--  | 228 |
| 108 | QQLSNF                  | -----       | GRPMLTHNGIPII    | MNDWIAGDEVK  | ----- | GTNS | 232 |
| 109 | QQLSNF                  | -----       | GRPMLTHNGIPII    | MNDWIAGDEVK  | ----- | GTNS | 232 |
| 110 | QQLSNF                  | -----       | GRPMLTHNGIPII    | MNDWIAGDEVK  | ----- | GTNS | 232 |
| 111 | VMIKDF                  | -----       | GM-VMAHNGTPLL    | RNDFLPGNETL  | ----- | GTGN | 231 |
| 112 | QQLSNF                  | -----       | GRPMLTHNGIPII    | MNDWIAGDEVK  | ----- | GTNS | 234 |
| 113 | QQLSNF                  | -----       | GRPMLTHNGIPII    | MNDWIAGDEVK  | ----- | GTNS | 232 |
| 114 | QQLSNF                  | -----       | GRPMLTHNGIPII    | MNDWIAGDEVK  | ----- | GTNS | 232 |
| 115 | LQIDNF                  | -----       | GLSVPAHDGIPII    | NEFIPGNVAQ   | ----- | GSTA | 233 |
| 116 | VMLKNF                  | -----       | GHPMLTHNGVPII    | VNDYIKVDE    | ----- | GDES | 228 |
| 117 | QMVENF                  | -----       | GRPMLAHNGVPIVM   | NNEFLPADEVQ  | ----- | GTNT | 232 |
| 118 | QMVENF                  | -----       | GRPMLTHNGVPIVM   | NNEFLPADEVQ  | ----- | GTNT | 232 |
| 119 | VMLKNF                  | -----       | GHPMLTHNGVPII    | VNDYIKVDE    | ----- | GDES | 228 |
| 120 | IQHPNF                  | -----       | DVPVLAHNGCPII    | INDFMPGDELM  | ----- | GSNS | 233 |
| 121 | QQLSNF                  | -----       | GRPMLTHNGIPII    | MNDWIAGDEVK  | ----- | GTNS | 232 |
| 122 | QQLSNF                  | -----       | GRPMLTHNGIPII    | MNDWIAGDEVK  | ----- | GTNS | 232 |
| 123 | QQLENF                  | -----       | GRPMLTHNGIPII    | MNEFLAADEAQ  | ----- | GTAT | 232 |
| 124 | QQLSNF                  | -----       | GRPMLTHNGIPII    | MNEWIAGDEVK  | ----- | GTNQ | 232 |
| 125 | QQLSNF                  | -----       | GRPMLTHNGIPII    | MNEWIAGDEVK  | ----- | GTNQ | 232 |
| 126 | QQLSNF                  | -----       | GRPMLTHNGIPII    | MNDWIAGDEVK  | ----- | GTNS | 232 |
| 127 | IIVKDF                  | -----       | GKPLPAFDGTPVI    | INDYIGADEVQ  | ----- | GAST | 232 |
| 128 | IIVKDF                  | -----       | GKALPAFDGTPVI    | INDYITADEVQ  | ----- | GAST | 232 |
| 129 | VEIPNF                  | -----       | GQAVLAHNGIPII    | LRNDWLANDETM | ----- | GTNA | 232 |
| 130 | VEIPNF                  | -----       | GQAVLAHNGIPII    | LRNDWLANDETM | ----- | GTNA | 232 |
| 131 | VEIPNF                  | -----       | GQAVLAHNGIPII    | LRNDWLANDETM | ----- | GTNA | 232 |
| 132 | QQLSNF                  | -----       | GRPMLTHNGIPII    | MNDWIAGDEVK  | ----- | GTNS | 232 |
| 133 | VMEMPN                  | -----       | GARVIAYEGVPI     | FRNDYIPTNQTK | ----- | GGYA | 235 |
| 134 | VEIPNF                  | -----       | GQAVLAHNGIPII    | LRNDWLANDETM | ----- | GSNA | 232 |
| 135 | QQLSNF                  | -----       | GRPMLTHNGIPII    | MNDWIAGDEVK  | ----- | GTNS | 232 |
| 136 | VMMENF                  | -----       | GRPMLTHNGTPII    | VNDFI-AKT    | ----- | GDAG | 227 |
| 137 | VTLPGT                  | -----       | GISVPAYRRTPII    | INDFLPGDELH  | ----- | GTKS | 232 |
| 138 | QQLENF                  | -----       | GRPMLTHNGIPII    | MNEFLAADEAQ  | ----- | GSAN | 235 |
| 139 | IMLPNF                  | -----       | GHPVPAIDGMPVI    | INDFIPANEVT  | ----- | GSSS | 232 |
| 140 | VMLPQF                  | -----       | GKVMLTHNGVPII    | VNDFLPPVTD   | ----- | GEGT | 229 |
| 141 | LILPNF                  | -----       | GRPMLCHNGMPII    | VNDYI-GTEAQ  | ----- | GSAD | 234 |
| 142 | TMIENF                  | -----       | GHPVKAYDGTPII    | INDFLPANDEVQ | ----- | GTAN | 232 |
| 143 | VMLPQF                  | -----       | GKVMLTHNGVPII    | VNDFLPPVTD   | ----- | GEGT | 229 |
| 144 | IMIPNF                  | -----       | GHPVKAYDGTPII    | INDFLTANEVQ  | ----- | GSAT | 232 |
| 145 | IMLENF                  | -----       | GQSIPAYNGKPII    | INNYITADETQ  | ----- | GAGD | 232 |
| 146 | VTLPGT                  | -----       | GINVPAYRRTPII    | INDFLPGDEVH  | ----- | AAGT | 232 |



|     |        |       |                |             |       |        |     |
|-----|--------|-------|----------------|-------------|-------|--------|-----|
| 147 | IMMENF | ----- | SRPMLCHNGVPFIV | NDFIPK      | ----- | NEGD   | 226 |
| 148 | IMMENF | ----- | GRPMLCHNGVPFIV | NDFIPK      | ----- | NEGD   | 226 |
| 149 | IMMENF | ----- | GRPMLCHNGVPFIV | NDFIPK      | ----- | NEGD   | 226 |
| 150 | IMMENF | ----- | GRPMLCHNGVPFIV | NDFIPK      | ----- | NDN    | 226 |
| 151 | IMMENF | ----- | GRPMLCHNGIPFIV | NDFIPK      | ----- | KTEGQE | 239 |
| 152 | IMMENF | ----- | GRPMLCHNGVPFIV | NDFIPK      | ----- | NDN    | 226 |
| 153 | IMIPNF | ----- | GHPVKAYDGTPI   | INDFLTADEVQ | ----- | GSAT   | 232 |
| 154 | IMMENF | ----- | GRPMLCHNGVPFIV | NDFIPK      | ----- | TEEN   | 226 |
| 155 | IMMENF | ----- | GRPMLCHNGIPFIV | NDFIPK      | ----- | KTEGQE | 239 |
| 156 | IMMENF | ----- | GRPMLCHNGVPFIV | NDFIPK      | ----- | NDN    | 226 |
| 157 | IMMENF | ----- | GRPMLCHNGVPFIV | NDFIPK      | ----- | NDN    | 226 |
| 158 | IMMENF | ----- | GRPMLCHNGIPFIV | NDFIPK      | ----- | KTEGQE | 239 |
| 159 | IMMENF | ----- | GRPMLCHNGIPFIV | NDFIPK      | ----- | KTEGQE | 239 |
| 160 | IMMENF | ----- | GRPMLCHNGIPFIV | NDFIPK      | ----- | KTEGQE | 239 |
| 161 | QMVENF | ----- | GRPMLTHNGVPIVM | NEFLPADEV   | ----- | GTNT   | 232 |
| 162 | VMMPAF | ----- | GRPMLTHNGVPI   | INDFILNETT  | ----- | GTSN   | 239 |
| 163 | IMMENF | ----- | GRPMLCHNGIPFIV | NDFIPK      | ----- | KTEGQE | 239 |
| 164 | IMMENF | ----- | GRPMLCHNGVPFIV | NDFIPK      | ----- | NDN    | 226 |
| 165 | IMMENF | ----- | GRPMLCHNGVPFIV | NDFIPK      | ----- | NDN    | 226 |
| 166 | IMMENF | ----- | GRPMLCHNGVPFIV | NDFIPK      | ----- | NDN    | 226 |
| 167 | IMMENF | ----- | GRPMLCHNGVPFIV | NDFIPK      | ----- | NDGD   | 226 |
| 168 | IMMENF | ----- | GRPMLCHNGVPFIV | NDFIPK      | ----- | NDN    | 226 |
| 169 | IMMEDF | ----- | GRPMLCHNGVPFIV | NDFIPK      | ----- | NDGD   | 226 |
| 170 | IMMENF | ----- | GRPMLCHNGVPFIV | NDFIP       | ----- | TDS    | 224 |
| 171 | IMMENF | ----- | GRPMLCHNGVPFIV | NDFIPK      | ----- | NDN    | 226 |
| 172 | IMMENF | ----- | GRPMLCHNGIPFIV | NDFIPK      | ----- | KTEGQE | 239 |
| 173 | IMMENF | ----- | GRPMLCHNGVPFIV | NDFIP       | ----- | TDS    | 224 |
| 174 | IMMENF | ----- | GRPMLCHNGVPFIV | NDFIP       | ----- | TDS    | 224 |
| 175 | IMMENF | ----- | GRPMLCHNGVPFIV | NDFIP       | ----- | TDS    | 224 |
| 176 | IMMENF | ----- | GRPMLCHNGVPFIV | NDFIPK      | ----- | NDGD   | 226 |
| 177 | IMMENF | ----- | GRPMLCHNGIPFIV | NDFIPK      | ----- | KTEGQE | 239 |
| 178 | IMMENF | ----- | GRPMLCHNGIPFIV | NDFIPK      | ----- | KTEGQE | 239 |
| 179 | IMMENF | ----- | GRPMLCHNGVPFIV | NDFIP       | ----- | TDS    | 224 |
| 180 | IMMENF | ----- | GRPMLCHNGVPFIV | NDFIPK      | ----- | NDN    | 226 |
| 181 | IMMENF | ----- | GRPMLCHNGVPFIV | NDFIP       | ----- | TDA    | 224 |
| 182 | IMMENF | ----- | GRPMLCHNGVPFIV | NDFIP       | ----- | TDS    | 224 |
| 183 | IMMENF | ----- | GRPMLCHNGVPFIV | NDFIP       | ----- | TDA    | 224 |
| 184 | IMMENF | ----- | GRPMLCHNGVPFIV | NDFIP       | ----- | TDS    | 224 |
| 185 | IMMENF | ----- | GRPMLCHNGIPFIV | NDFIPK      | ----- | KTEGQE | 239 |
| 186 | IMMENF | ----- | GRPMLCHNGVPFIV | NDFIP       | ----- | TDS    | 224 |
| 187 | IMMENF | ----- | GRPMLCHNGVPFIV | NDFIP       | ----- | TDS    | 224 |
| 188 | IMMENF | ----- | GRPMLCHNGVPFIV | NDFIP       | ----- | TDA    | 224 |
| 189 | IMMENF | ----- | GRPMLCHNGVPFIV | NDFIP       | ----- | TDS    | 224 |
| 190 | V--NAF | ----- | GRRIETYDGIPIA  | ADDFILNTETQ | ----- | GTSS   | 231 |
| 191 | IMMENF | ----- | GRPMLCHNGIPFIV | NDFIPK      | ----- | KTEGQE | 239 |
| 192 | MMIENF | ----- | G-MVPAIDGMPVI  | INDFIRADEVQ | ----- | GTND   | 231 |
| 193 | IMMENF | ----- | GRPMLCHNGVPFIV | NDFIP       | ----- | TDS    | 224 |
| 194 | IMMENF | ----- | GRPMLCHNGVPFIV | NDFIP       | ----- | TDS    | 224 |
| 195 | IMMENF | ----- | GRPMLCHNGVPFIV | NDFIP       | ----- | TDS    | 224 |
| 196 | IMMENF | ----- | GRPMLCHNGVPFIV | NDFIP       | ----- | TDS    | 224 |
| 197 | IMMENF | ----- | GRPMLCHNGVPFIV | NDFIP       | ----- | TDS    | 224 |
| 198 | IMMENF | ----- | GRPMLCHNGVPFIV | NDFIP       | ----- | TDA    | 224 |
| 199 | IMMENF | ----- | GRPMLCHNGVPFIV | NDFIP       | ----- | TDS    | 224 |
| 200 | IMMENF | ----- | GRPMLCHNGVPFIV | NDFIP       | ----- | TDS    | 224 |
| 201 | IMMENF | ----- | DRPMLCHNGVPFIV | NDFIP       | ----- | TDA    | 224 |
| 202 | ITIKDF | ----- | G-TVKAYDGTPI   | INDFLTDNEVQ | ----- | GTAN   | 231 |
| 203 | IMMENF | ----- | GRPMLCHNGVPFIV | NDFIP       | ----- | TDA    | 224 |
| 204 | QQLENF | ----- | GRPMLTHNGIPVIM | NEWLPANETQ  | ----- | GTSV   | 233 |
| 205 | IMMENF | ----- | GRPMLCHNGVPFIV | NDFIP       | ----- | TDS    | 224 |
| 206 | IMMENF | ----- | GRPMLCHNGVPFIV | NDFIP       | ----- | TDS    | 224 |
| 207 | IMMENF | ----- | GRPMLCHNGVPFIV | NDFIP       | ----- | TDA    | 224 |
| 208 | IMMENF | ----- | GRPMLCHNGVPFIV | NDFIP       | ----- | TDA    | 224 |
| 209 | IMMENF | ----- | GRPMLCHNGVPFIV | NDFIP       | ----- | TDS    | 224 |
| 210 | IMMENF | ----- | GRPMLCHNGVPFIV | NDFIP       | ----- | TDA    | 224 |
| 211 | IMMENF | ----- | GRPMLCHNGVPFIV | NDFIP       | ----- | TDS    | 224 |
| 212 | IMMENF | ----- | GRPMLCHNGVPFIV | NDFIP       | ----- | TDA    | 224 |
| 213 | IMMENF | ----- | GRPMLCHNGVPFIV | NDFIP       | ----- | TDA    | 224 |

|     |        |       |                |       |       |               |       |        |     |
|-----|--------|-------|----------------|-------|-------|---------------|-------|--------|-----|
| 214 | IMMENF | ----- | GRPMLCHNGI     | PFIV  | NDFIP | KNGVKVTEGSEQ  | ----- | KTEGQE | 239 |
| 215 | IMMENF | ----- | GRPMLCHNGVPFI  | I     | NDFIP | -----         | ----- | TDS    | 224 |
| 216 | IMMENF | ----- | GRPMLCHNGVPFI  | I     | NDFIP | -----         | ----- | TDS    | 224 |
| 217 | IMMENF | ----- | GRPMLCHNGVPFI  | I     | NDFIP | -----         | ----- | TDS    | 224 |
| 218 | IMMENF | ----- | GRPMLCHNGVPFI  | I     | NDFIP | -----         | ----- | TDS    | 224 |
| 219 | IMMENF | ----- | GRPMLCHNGVPFI  | I     | NDFIP | -----         | ----- | TDS    | 224 |
| 220 | IMMENF | ----- | GRPMLCHNGVPFI  | I     | NDFIP | -----         | ----- | TDS    | 224 |
| 221 | IMMENF | ----- | GRPMLCHNGVPFI  | I     | NDFIP | -----         | ----- | TDS    | 224 |
| 222 | IMMENF | ----- | GRPMLCHNGVPFI  | I     | NDFIP | -----         | ----- | TDS    | 224 |
| 223 | IMMENF | ----- | GRPMLCHNGVPFI  | I     | NDFIP | -----         | ----- | TDA    | 224 |
| 224 | IMMENF | ----- | GRSMLCHNGVPFI  | V     | NDFIP | -----         | ----- | TDA    | 224 |
| 225 | IMMENF | ----- | GRPMLCHNGVPFI  | I     | NDFIP | -----         | ----- | TDA    | 224 |
| 226 | IMMENF | ----- | GRPMLCHNGVPFI  | I     | NDFIP | -----         | ----- | TDS    | 224 |
| 227 | IMMENF | ----- | GRPMLCHNGVPFI  | I     | NDFIP | -----         | ----- | TDA    | 224 |
| 228 | QMLPAF | ----- | GHPMLVHQGMPILM | NEFIP | MGE-D | -----         | ----- | G      | 226 |
| 229 | IMMENF | ----- | GRPMLCHNGVPFI  | I     | NDFIP | -----         | ----- | TDS    | 224 |
| 230 | QMLPAF | ----- | GHPMLVHQGMPILM | NEFIP | MGE-D | -----         | ----- | G      | 226 |
| 231 | IMMENF | ----- | GRPMLCHNGVPFI  | I     | NDFIP | -----         | ----- | TGA    | 224 |
| 232 | IMMENF | ----- | GRPMLCHNGI     | PFIV  | NDFIP | KNGVKVTEDESEQ | ----- | KTEGQE | 239 |
| 233 | IMMENF | ----- | GRPMLCHNGVPFI  | I     | NDFIP | -----         | ----- | TDS    | 224 |
| 234 | IMMENF | ----- | GRPMLCHNGVPFI  | V     | NDFIP | -----         | ----- | TDA    | 224 |
| 235 | IMMENF | ----- | GRPMLCHNGVPFI  | V     | NDFIP | -----         | ----- | TDA    | 224 |
| 236 | IMMENF | ----- | GRPMLCHNGVPFI  | I     | NDFIP | -----         | ----- | TDS    | 224 |
| 237 | IMMENF | ----- | GRPMLCHNGVPFI  | I     | NDFIP | -----         | ----- | TDA    | 224 |
| 238 | IMMENF | ----- | GRPMLCHNGVPFI  | V     | NDFIP | -----         | ----- | TDS    | 224 |
| 239 | I--DQF | ----- | GQRIVTYDGI     | PVLVD | DFVP  | DDETL         | ----- | GSGT   | 231 |
| 240 | IMMENF | ----- | GRPMLCHNGI     | PFIV  | NDFIP | KNGVKVTEDESEQ | ----- | KTEGQE | 239 |
| 241 | IMMENF | ----- | GRPMLCHNGVPFI  | V     | NDFIP | -----         | ----- | TDA    | 224 |
| 242 | IMMENF | ----- | GRPMLCHNGVPFI  | I     | NDFIP | -----         | ----- | TDA    | 224 |
| 243 | IMMENF | ----- | GRPMLCHNGVPFI  | V     | NDFIP | -----         | ----- | TDA    | 224 |
| 244 | IMMENF | ----- | GRPMLCHNGVPFI  | I     | NDFIP | -----         | ----- | TDA    | 224 |
| 245 | IMMENF | ----- | GRPMLCHNGVPFI  | I     | NDFIP | -----         | ----- | TDA    | 224 |
| 246 | IMMENF | ----- | GRPMLCHNGVPFI  | V     | NDFIP | -----         | ----- | TDA    | 224 |
| 247 | IMMENF | ----- | GRPMLCHNGVPFI  | I     | NDFIP | -----         | ----- | TDA    | 224 |
| 248 | IMMENF | ----- | GRPMLCHNGVPFI  | I     | NDFIP | -----         | ----- | TDS    | 224 |
| 249 | IMMENF | ----- | GRPMLCHNGVPFI  | I     | NDFIP | -----         | ----- | TDA    | 224 |
| 250 | IMMENF | ----- | GRPMLCHNGVPFI  | I     | NDFIP | -----         | ----- | TDA    | 224 |
| 251 | IMMENF | ----- | GRPMLCHNGVPFI  | I     | NDFIP | -----         | ----- | TDS    | 224 |
| 252 | IMMENF | ----- | GRPMLCHNGVPFI  | I     | NDFIP | -----         | ----- | TDS    | 224 |
| 253 | IMMENF | ----- | GRPMLCHNGVPFI  | I     | NDFIP | -----         | ----- | TDS    | 224 |
| 254 | IMMENF | ----- | GRPMLCHNGVPFI  | I     | NDFIP | -----         | ----- | TDA    | 224 |
| 255 | IMMENF | ----- | GRPMLCHNGVPFI  | I     | NDFIP | -----         | ----- | TDS    | 224 |
| 256 | IMMENF | ----- | GRPMLCHNGVPFI  | V     | NDFIP | -----         | ----- | TDA    | 224 |
| 257 | IMMENF | ----- | GRPMLCHNGVPFI  | V     | NDFIP | -----         | ----- | TDA    | 224 |
| 258 | IMMENF | ----- | GRPMLCHNGVPFI  | I     | NDFIP | -----         | ----- | TDS    | 224 |
| 259 | IMMENF | ----- | GRPMLCHNGVPFI  | I     | NDFIP | -----         | ----- | TDA    | 224 |
| 260 | IMMENF | ----- | GRPMLCHNGVPFI  | V     | NDFIP | -----         | ----- | TDA    | 224 |
| 261 | IMMENF | ----- | GRPMLCHNGVPFI  | I     | NDFIP | -----         | ----- | VADS   | 225 |
| 262 | IMMENF | ----- | GRPMLCHNGVPFI  | I     | NDFIP | -----         | ----- | TDS    | 224 |
| 263 | IMLENF | ----- | GRPMLCHNGI     | PFII  | NDFIP | K             | ----- | TEEN   | 226 |
| 264 | IMMENF | ----- | GRPMLCHNGVPFI  | I     | NDFIP | K             | ----- | NEDN   | 226 |
| 265 | IMMENF | ----- | GRPMLCHNGVPFI  | V     | NDFIP | -----         | ----- | VSDS   | 225 |
| 266 | IMMENF | ----- | GRPMLCHNGVPFI  | I     | NDFIP | -----         | ----- | TDS    | 224 |
| 267 | IMMENF | ----- | GRPMLCHNGVPFI  | V     | NDFIP | -----         | ----- | VADS   | 225 |
| 268 | IMMENF | ----- | GRPMLCHNGVPFI  | V     | NDFIP | -----         | ----- | VSDS   | 225 |
| 269 | IMMENF | ----- | GRPMLCHNGVPFI  | V     | NDFIP | -----         | ----- | TDA    | 224 |
| 270 | QMLPAF | ----- | GHHMLVHQGMPILM | NEFIP | MET-D | -----         | ----- | G      | 226 |
| 271 | IMMENF | ----- | GRPMLCHNGVPFI  | V     | NDFIP | -----         | ----- | TDA    | 224 |
| 272 | IMMENF | ----- | GRPMLCHNGVPFI  | V     | NDFIP | -----         | ----- | TDA    | 224 |
| 273 | IMMENF | ----- | GRPMLCHNGVPFI  | V     | NDFIP | -----         | ----- | VADS   | 225 |
| 274 | IMMENF | ----- | GRPMLCHNGVPFI  | V     | NDFIP | -----         | ----- | VADS   | 225 |
| 275 | IMMENF | ----- | GRPMLCHNGVPFI  | I     | NDFIP | -----         | ----- | TDS    | 224 |
| 276 | IMMENF | ----- | GRPMLCHNGVPFI  | V     | NDFIP | -----         | ----- | TDA    | 224 |
| 277 | IMMENF | ----- | GRPMLCHNGVPFI  | I     | NDFIP | -----         | ----- | TDS    | 224 |
| 278 | IMMENF | ----- | GRPMLCHNGVPFI  | I     | NDFIP | -----         | ----- | VADS   | 225 |
| 279 | IMMENF | ----- | GRPMLCHNGVPFI  | I     | NDFI  | T             | ----- | TDA    | 224 |
| 280 | IMMENF | ----- | GRPMLCHNGVPFI  | V     | NDFIP | -----         | ----- | TDA    | 224 |

|     |        |       |                                 |       |        |     |
|-----|--------|-------|---------------------------------|-------|--------|-----|
| 281 | QQLSNF | ----- | GRPMLTHNGIPIIMNDWIAGDEVK        | ----- | GTNS   | 232 |
| 282 | IMMENF | ----- | GRPMLCHNGVPFIVNDFIP             | ----- | VADS   | 225 |
| 283 | IMMENF | ----- | GRPMLCHNGVPFIVNDFIP             | ----- | TDA    | 224 |
| 284 | IMMENF | ----- | GRPMLCHNGVPFIVNDFIP             | ----- | TDS    | 224 |
| 285 | IMMENF | ----- | GRPMLCHNGVPFIVNDFIP             | ----- | TDS    | 224 |
| 286 | IMMENF | ----- | GRPMLCHNGVPFIVNDFIP             | ----- | TDS    | 224 |
| 287 | IMMENF | ----- | GRPMLCHNGVPFIVNDFIP             | ----- | VVDS   | 225 |
| 288 | IMMENF | ----- | GRPMLCHNGVPFIVNDFIP             | ----- | TDA    | 224 |
| 289 | IMMENF | ----- | GRPMLCHNGVPFIVNDFIP             | ----- | VADS   | 225 |
| 290 | IMMENF | ----- | GRPMLCHNGVPFIVNDFIP             | ----- | TDS    | 224 |
| 291 | IMMENF | ----- | GRPMLCHNGVPFIVNDFIP             | ----- | TDS    | 224 |
| 292 | IMMENF | ----- | GRPMLCHNGVPFIVNDFIP             | ----- | TDS    | 224 |
| 293 | IMMENF | ----- | GRPMLCHNGVPFIVNDFIP             | ----- | TDA    | 224 |
| 294 | IMMENF | ----- | GRPMLCHNGVPFIVNDFIP             | ----- | TDA    | 224 |
| 295 | IMMENF | ----- | GRPMLCHNGVPFIVNDFIP             | ----- | VADS   | 225 |
| 296 | IMMENF | ----- | GRPMLCHNGVPFIVNDFIP             | ----- | VADS   | 225 |
| 297 | IMMENF | ----- | GRPMLCHNGVPFIVNDFIP             | ----- | VADS   | 225 |
| 298 | IMMENF | ----- | GRPMLCHNGVPFIVNDFIP             | ----- | TDS    | 224 |
| 299 | IMMENF | ----- | GRPMLCHNGVPFIVNDFIP             | ----- | VADS   | 225 |
| 300 | IMMENF | ----- | GRPMLCHNGVPFIVNDFIP             | ----- | TDS    | 218 |
| 301 | IMIENF | ----- | GRPMLCHNGVPFIVNDFIP             | ----- | VADS   | 225 |
| 302 | IMMENF | ----- | GRPMLCHNGVPFIVNDFIP             | ----- | VADS   | 225 |
| 303 | IMMENF | ----- | GRPMLCHNGVPFIVNDFIP             | ----- | TDA    | 224 |
| 304 | IMMENF | ----- | GRPMLCHNGVPFIVNDFIP             | ----- | VVDS   | 225 |
| 305 | IMMENF | ----- | GRPMLCHNGVPFIVNDFIP             | ----- | VADS   | 225 |
| 306 | IMMENF | ----- | GRPMLCHNGVPFIVNDFIP             | ----- | VADS   | 225 |
| 307 | IMMENF | ----- | GRPMLCHNGVPFIVNDFIP             | ----- | ADA    | 224 |
| 308 | IMMENF | ----- | GRPMLCHNGVPFIVNDFIP             | ----- | VADS   | 225 |
| 309 | IMMENF | ----- | GRPMLCHNGVPFIVNDFIP             | ----- | TDA    | 224 |
| 310 | IMMENF | ----- | GRPMLCHNGVPFIVNDFIP             | ----- | TDS    | 224 |
| 311 | IMMENF | ----- | GRPMLCHNGVPFIVNDFIP             | ----- | ADA    | 224 |
| 312 | IMMENF | ----- | GRPMLCHNGVPFIVNDFIP             | ----- | VVDS   | 225 |
| 313 | IMMENF | ----- | GRPMLCHNGVPFIVNDFIP             | ----- | TDA    | 224 |
| 314 | IMMENF | ----- | GRPMLCHNGVPFIVNDFIP             | ----- | TDS    | 224 |
| 315 | IMMENF | ----- | GRPMLCHNGVPFIVNDFIP             | ----- | TDS    | 224 |
| 316 | IMMENF | ----- | GRPMLCHNGVPFIVNDFIP             | ----- | VADS   | 225 |
| 317 | IMMENF | ----- | GRPMLCHNGVPFIVNDFIPK            | ----- | NEDN   | 226 |
| 318 | IMMENF | ----- | GRPMLCHNGVPFIVNDFIP             | ----- | VADS   | 225 |
| 319 | IMMENF | ----- | GRPMLCHNGVPFIVNDFIP             | ----- | VADS   | 225 |
| 320 | IMMENF | ----- | GRPMLCHNGVPFIVNDFIP             | ----- | TDA    | 224 |
| 321 | IMMENF | ----- | GRPMLCHNGVPFIVNDFIP             | ----- | VADS   | 225 |
| 322 | IMMENF | ----- | GRPMLCHNGVPFIVNDFIP             | ----- | TDA    | 224 |
| 323 | IMMENF | ----- | GRPMLCHNGVPFIVNDFIP             | ----- | TDS    | 224 |
| 324 | IMMENF | ----- | GRPMLCHNGVPFIVNDFIP             | ----- | TDS    | 224 |
| 325 | IMMENF | ----- | GRPMLCHNGVPFIVNDFIP             | ----- | TDA    | 224 |
| 326 | IMMENF | ----- | GRPMLCHNGVPFIVNDFIP             | ----- | VADS   | 225 |
| 327 | IMMENF | ----- | GRPMLCHNGVPFIVNDFIP             | ----- | VADS   | 225 |
| 328 | IMMENF | ----- | GRPMLCHNGVPFIVNDFIP             | ----- | VADS   | 225 |
| 329 | IMMENF | ----- | GRPMLCHNGVPFIVNDFIP             | ----- | TDA    | 224 |
| 330 | IMMENF | ----- | GRPMLCYNGVPFIVNDFIP             | ----- | TDA    | 224 |
| 331 | IMMENF | ----- | GRPMLCHNGVPFIVNDFIP             | ----- | IADS   | 225 |
| 332 | IMMENF | ----- | GRPMLCHNGVPFIVNDFIP             | ----- | TDA    | 224 |
| 333 | IMMENF | ----- | GRPMLCHNGVPFIVNDFIP             | ----- | TDA    | 224 |
| 334 | IMMENF | ----- | GRPMLCHNGVPFIVNDFIPK            | ----- | SEDN   | 226 |
| 335 | IMMENF | ----- | GRPMLCHNGVPFIVNDFIP             | ----- | TDS    | 224 |
| 336 | IMMENF | ----- | GRPMLCHNGVPFIVNDFIP             | ----- | TDA    | 224 |
| 337 | IMMENF | ----- | GRPMLCHNGVPFIVNDFIP             | ----- | TDS    | 224 |
| 338 | IMMENF | ----- | GRPMLCHNGVPFIVNDFIP             | ----- | VADS   | 225 |
| 339 | IMMENF | ----- | GRPMLCHNGVPFIVNDFIP             | ----- | ADA    | 224 |
| 340 | IMMENF | ----- | GRPMLCHNGVPFIVNDFIP             | ----- | VADS   | 225 |
| 341 | IMMENF | ----- | GRPMLCHNGIPFIVNDFIP             | ----- | TDA    | 224 |
| 342 | IMMENF | ----- | GRPMLCHNGIPFIVNDFIPKNGVKVTEDSEQ | ----- | KTEGQE | 239 |
| 343 | IMMENF | ----- | GRPMLCHNGVPFIVNDFIP             | ----- | TDA    | 224 |
| 344 | IMMENF | ----- | GRPMLCHNGVPFIVNDFIP             | ----- | TDA    | 224 |
| 345 | IMMENF | ----- | GRPMLCHNGVPFIVNDFIP             | ----- | VADS   | 225 |
| 346 | IMMENF | ----- | GRPMLCHNGVPFIVNDFIP             | ----- | TDA    | 224 |
| 347 | IMMENF | ----- | GRPMLCHNGVPFIVNDFIP             | ----- | TDA    | 224 |

|     |        |       |               |                    |       |        |     |
|-----|--------|-------|---------------|--------------------|-------|--------|-----|
| 348 | IMMENF | ----- | GRPMLCHNGIPFI | INDFIPK            | ----- | NEDG   | 226 |
| 349 | IMMENF | ----- | GRPMLCHNGVPFI | VNDFIP             | ----- | TDA    | 224 |
| 350 | IMMENF | ----- | GRPMLCHNGVPFI | VNDFIP             | ----- | TDS    | 224 |
| 351 | QQLSNF | ----- | GRPMLTHNGIPI  | IMNDWIAGDEVK       | ----- | GTNS   | 213 |
| 352 | IMMENF | ----- | GRPMLCHNGVPFI | VNDFIP             | ----- | TDA    | 224 |
| 353 | VITLPD | ----- | GSQIPAYRNIPI  | FRNDYIPTDQTK       | ----- | GATS   | 236 |
| 354 | IMMENF | ----- | GRPMLCHNGVPFI | VNDFIP             | ----- | VADS   | 222 |
| 355 | IMMENF | ----- | GRPMLCHNGVPFI | INDFIPK            | ----- | SEDN   | 226 |
| 356 | IMMENF | ----- | GRPMLCHNGVPFI | VNDFIP             | ----- | TDA    | 224 |
| 357 | IMMENF | ----- | GRPMLCHNGVPFI | VNDFIP             | ----- | VADS   | 225 |
| 358 | IMMENF | ----- | GRPMLCHNGVPFI | VNDFIS             | ----- | TDA    | 224 |
| 359 | IMMENF | ----- | GRPMLCHNGVPFI | VNDFIP             | ----- | VADS   | 225 |
| 360 | IMMENF | ----- | GRPMLCHNGVPFI | VNDFIP             | ----- | ADA    | 224 |
| 361 | IMMENF | ----- | GRPMLCHNGVPFI | VNDFIPL            | ----- | TTEK   | 226 |
| 362 | IMMENF | ----- | GRPMLCHNGVPFI | INDFIP             | ----- | VADS   | 225 |
| 363 | IMMENF | ----- | GRPMLCHNGVPFI | VNDFIP             | ----- | TDA    | 224 |
| 364 | IMMENF | ----- | GRPMLCHNGVPFI | VNDFIP             | ----- | ADA    | 224 |
| 365 | IMMENF | ----- | GRPMLCHNGVPFI | VNDFIP             | ----- | TDA    | 224 |
| 366 | IMMENF | ----- | GRPMLCHNGVPFI | VNDFIP             | ----- | TDA    | 224 |
| 367 | IMLENF | ----- | GRPMLCHNGIPFI | INDFIPK            | ----- | TE DG  | 226 |
| 368 | IMMENF | ----- | GRPMLCHNGIPFI | INDFIPK            | ----- | GE DG  | 226 |
| 369 | IMMENF | ----- | GRPMLCHNGVPFI | VNDFIP             | ----- | TDA    | 224 |
| 370 | IMMENF | ----- | GRPMLCHNGVPFI | VNDFIP             | ----- | TDS    | 224 |
| 371 | IMMENF | ----- | GRPMLCHNGVPFI | VNDFIP             | ----- | ADA    | 224 |
| 372 | IMMENF | ----- | GRPMLCHNGVPFI | VNDFIP             | ----- | ADA    | 224 |
| 373 | IMMENF | ----- | GRPMLCHNGVPFI | VNDFIP             | ----- | TDA    | 224 |
| 374 | IMMENF | ----- | GRPMLCHNGVPFI | INDFIP             | ----- | TDS    | 224 |
| 375 | IMMENF | ----- | GRPMLCHNGVPFI | VNDFIP             | ----- | ADA    | 224 |
| 376 | IMMENF | ----- | GRPMLCHNGVPFI | VNDFIP             | ----- | TDA    | 224 |
| 377 | V--DQF | ----- | GQRVLFYDGI    | PVLVDVFVPDNETL     | ----- | GTGT   | 231 |
| 378 | IMMENF | ----- | GRPMLCHNGVPFI | VNDFIP             | ----- | TDA    | 224 |
| 379 | IMMENF | ----- | GRPMLCHNGVPFI | VNDFIP             | ----- | TDS    | 224 |
| 380 | IMMENF | ----- | GRPMLCHNGIPFI | INDFIPK            | ----- | TE DG  | 226 |
| 381 | IMMENF | ----- | GRPMLCHNGIPFI | INDFIPK            | ----- | TE DG  | 226 |
| 382 | VFELPS | ----- | GKNVPAYSGI    | PILRNDWIPINQTK     | ----- | GSGT   | 235 |
| 383 | IMMENF | ----- | GRPMLCHNGIPFI | INDFIPK            | ----- | SE DG  | 226 |
| 384 | IMMENF | ----- | GRPMLCHNGIPFI | INDFIPK            | ----- | SE DG  | 226 |
| 385 | IMMENF | ----- | GRPMLCHNGVPFI | VNDFIP             | ----- | TDA    | 224 |
| 386 | IMMENF | ----- | GRPMLCHNDVPFI | VNDFIP             | ----- | TDA    | 224 |
| 387 | IMIPNF | ----- | GLALPAHNGVPI  | IINDFMPTTENV       | ----- | GGTA   | 234 |
| 388 | IMMENF | ----- | GRPMLCHNGIPFI | INDFIPK            | ----- | TE DG  | 226 |
| 389 | IMMENF | ----- | GRPMLCHNGVPFI | VNDFIP             | ----- | VADS   | 225 |
| 390 | VVEMPN | ----- | GTRIMAYEGVP   | IFRNDYIPVNQAK      | ----- | GGQA   | 235 |
| 391 | IMMENF | ----- | GRPMLCHNGIPFI | INDFIPK            | ----- | TE DG  | 226 |
| 392 | IMMENF | ----- | GRPMLCHNGVPFI | VNDFIP             | ----- | TDA    | 224 |
| 393 | IMMENF | ----- | GRPMLCHNGVPFI | VNDFIP             | ----- | TDA    | 224 |
| 394 | IMMENF | ----- | GRPMLCHNGIPFI | INDFIPK            | ----- | TE DG  | 226 |
| 395 | IMMENF | ----- | GRPMLCHNGIPFI | INDFIPK            | ----- | TE DG  | 226 |
| 396 | IMIENF | ----- | GRPMLCHNGIPFI | VNDFIPKNGVTI-EGSEE | ----- | KAEGTE | 238 |
| 397 | VYTMAS | ----- | GRQVPAYRGI    | PLFRNDWIPINQTTQ    | ----- | GSAT   | 239 |
| 398 | IMMENF | ----- | GRPMLCHNGVPFI | INDFIP             | ----- | TDS    | 224 |
| 399 | IMMENF | ----- | GRPMLCHNGVPFI | INDFIPK            | ----- | DTAN   | 226 |
| 400 | IMMENF | ----- | GRPMLCHNGIPFI | INDFIPK            | ----- | TE DG  | 226 |
| 401 | IMMENF | ----- | GRPMLCHNGIPFI | INDFIPK            | ----- | TE DG  | 226 |
| 402 | IMMENF | ----- | GRPMLCHNGIPFI | INDFIPK            | ----- | TE DG  | 226 |
| 403 | IMMENF | ----- | GRPMLCHNGVPFI | VNDFIP             | ----- | VADS   | 225 |
| 404 | IMMENF | ----- | GRPMLCHNDVPFI | VNDFIP             | ----- | VADS   | 225 |
| 405 | IMMENF | ----- | GRPMLCHNGVPFI | INDFIP             | ----- | TDS    | 224 |
| 406 | IMMENF | ----- | GRPMLCHNGIPFI | INDFIPK            | ----- | TE DS  | 226 |
| 407 | IMMENF | ----- | GRPMLCHNGVPFI | INDFIP             | ----- | VADS   | 225 |
| 408 | IMMENF | ----- | GRPMLCHNGVPFI | VNDFIS             | ----- | TDA    | 224 |
| 409 | IMMENF | ----- | GRPMLCHNGIPFI | INDFIPK            | ----- | TE DG  | 226 |
| 410 | IMMENF | ----- | GRPMLCHNGIPFI | INDFIPK            | ----- | TE DG  | 226 |
| 411 | IMMENF | ----- | GRPMLCHNGIPFI | INDFIPK            | ----- | TE DS  | 226 |
| 412 | IMMENF | ----- | GRPMLCHNGIPFI | INDFIPK            | ----- | TE DG  | 226 |
| 413 | IMMENF | ----- | GRPMLCHNGVPFI | INDFIP             | ----- | TDA    | 224 |
| 414 | IMMENF | ----- | GRPMLCHNGIPFI | INDFIPK            | ----- | SE DG  | 226 |

|     |                |       |           |       |          |             |       |        |        |     |
|-----|----------------|-------|-----------|-------|----------|-------------|-------|--------|--------|-----|
| 415 | IMMENF         | ----- | GRPMLCHNG | IPFI  | INDFIPK  | -----       | TE    | DG     | 226    |     |
| 416 | IMMENF         | ----- | GRPMLCHNG | IPFI  | INDFIPK  | -----       | TE    | DG     | 226    |     |
| 417 | IMIENF         | ----- | GRPMLCHNG | IPFIV | NDFIPK   | NGVTI-EGSEE | ----- | KAEGTE | 238    |     |
| 418 | IMMENF         | ----- | GRPMLCHNG | VPFI  | INDFIL   | -----       | T     | DA     | 224    |     |
| 419 | MMVKNF         | ----- | GMPIKCYDG | TPVI  | INDFIP   | PADEKQ      | ----- | GSAT   | 232    |     |
| 420 | IMMENF         | ----- | GRPMLCHNG | IPFI  | INDFIPK  | -----       | SE    | DG     | 226    |     |
| 421 | IMMENF         | ----- | GRPMLCHNG | VPFI  | INDFIP   | -----       | T     | DS     | 224    |     |
| 422 | IMMENF         | ----- | GRPMLCHNG | IPFIV | NDFIPK   | NGVKVTE     | EDSEQ | -----  | KTEGQE | 239 |
| 423 | IMIENF         | ----- | GRPMLCHNG | IPFIV | NDFIPK   | NGVTI-EGSEE | ----- | KAEGTE | 238    |     |
| 424 | IMMENF         | ----- | GRPMLCHNG | IPFI  | INDFIPK  | -----       | TE    | DG     | 226    |     |
| 425 | IMMENF         | ----- | GRPMLCHNG | IPFIV | NDFIPK   | NGVKVTE     | EDSEQ | -----  | KTEGQE | 239 |
| 426 | IMMENF         | ----- | GRPMLCHNG | IPFIV | NDFIPK   | NGVKVTE     | EDSEQ | -----  | KTEGQE | 239 |
| 427 | IMMENF         | ----- | GRPMLCHNG | IPFIV | NDFIPK   | NGVKVTE     | EDSEQ | -----  | KTEGQE | 239 |
| 428 | IMMENF         | ----- | GRPMLCHNG | IPFI  | INDFIPK  | -----       | TE    | DG     | 226    |     |
| 429 | IMMENF         | ----- | GRPMLCHNG | VPFI  | INDFIP   | -----       | T     | DS     | 224    |     |
| 430 | IMMENF         | ----- | GRPMLCHNG | IPFIV | NDFIPK   | NGVKVTE     | EDSEQ | -----  | KTEGQE | 239 |
| 431 | IMMENF         | ----- | GRPMLCHNG | IPFI  | INDFIPK  | -----       | TE    | DD     | 226    |     |
| 432 | VYQMPS         | ----- | GETVIAYS  | GVPI  | FRND     | YLATNQVK    | ----- | GS     | GS     | 235 |
| 433 | IMMENF         | ----- | GRPMLCHNG | VPFI  | INDFIP   | -----       | T     | DA     | 224    |     |
| 434 | IMIENF         | ----- | GRPMLCHNG | VPFIV | NDFIP    | -----       | V     | ADS    | 225    |     |
| 435 | IMMENF         | ----- | GRPMLCHNG | VPFIV | NDFIP    | -----       | V     | ADS    | 225    |     |
| 436 | IMMENF         | ----- | GRPMLCHNG | IPFI  | INDFIPK  | -----       | SE    | GG     | 226    |     |
| 437 | IMMENF         | ----- | GRPMLCHNG | VPFI  | INDFIP   | -----       | N     | EG     | 224    |     |
| 438 | IMMENF         | ----- | GRPMLCHNG | IPFI  | INDFIPK  | -----       | SE    | DG     | 226    |     |
| 439 | QMLPAF         | ----- | GHHMLVHQ  | GMPIL | MEFIP    | MAD-D       | ----- | G      | --     | 226 |
| 440 | IMMENF         | ----- | GRPMLCHNG | VPFI  | INDFIP   | -----       | T     | DS     | 224    |     |
| 441 | V--DQF         | ----- | GQRVLFYD  | GIPVL | DDFVP    | DNETL       | ----- | GT     | GT     | 231 |
| 442 | IMIENF         | ----- | GRPMLTHNG | VPFIV | NDFIPK   | TG          | ----- | E      | AKS    | 227 |
| 443 | IMMENF         | ----- | GRPMLCHNG | VPFIV | NDFIP    | -----       | T     | DA     | 224    |     |
| 444 | TLTLPS         | ----- | GEETLVYEG | VPIFR | NDWVP    | TNQTQ       | ----- | GS     | ST     | 235 |
| 445 | VFTLPS         | ----- | GKEMLAYSG | VPIFR | NDYIP    | VNQTK       | ----- | GT     | GS     | 235 |
| 446 | IMMENF         | ----- | GRPMLCHNG | VPFI  | INDFIP   | -----       | T     | DS     | 224    |     |
| 447 | IMMENF         | ----- | GRPMLCHNG | VPFI  | INDFIP   | -----       | T     | DS     | 224    |     |
| 448 | V--DQF         | ----- | GRRALFYD  | GIPIL | DDFIP    | DNETL       | ----- | GT     | GT     | 229 |
| 449 | IMMENF         | ----- | GRPMLCHNG | VPFI  | INDFIP   | -----       | T     | DS     | 224    |     |
| 450 | IMMENF         | ----- | GRPMLCHNG | VPFIV | NDFIP    | -----       | T     | DA     | 224    |     |
| 451 | V--DQF         | ----- | GQRIVTYD  | GIPVL | DDFVP    | PEDETL      | ----- | GT     | GN     | 231 |
| 452 | V--DAF         | ----- | GRRALFYD  | GIP   | IIVDDFIP | IDETL       | ----- | G      | AGS    | 231 |
| 453 | IMMENF         | ----- | GRPMLCHNG | IPFI  | INDFIPK  | -----       | SE    | DG     | 226    |     |
| 454 | VYTMAS         | ----- | GRQVPAYRG | IP    | IFRNDWIP | INQTQ       | ----- | GS     | SAS    | 239 |
| 455 | VEIPNF         | ----- | GQPVLAHNG | IPIL  | RNDWLSN  | SETM        | ----- | GS     | NS     | 232 |
| 456 | IMMENF         | ----- | GRPMLCHNG | VPFI  | INDFIP   | -----       | V     | ADS    | 225    |     |
| 457 | IMMENF         | ----- | GRPMLCHNG | VPFI  | INDFIP   | -----       | T     | DS     | 224    |     |
| 458 | IMMENF         | ----- | GRPMLCHNG | IPFI  | INDFIPK  | -----       | TE    | DG     | 226    |     |
| 459 | IQHKNF         | ----- | DNPVLAHNG | TP    | IIVNDFL  | PATEAK      | ----- | GT     | GT     | 232 |
| 460 | IMMENF         | ----- | GRPMLCHNG | VPFI  | INDFIP   | -----       | T     | DS     | 224    |     |
| 461 | VYVMAS         | ----- | GRSVPAYRG | IP    | IFRNDWIP | INQTQ       | ----- | GT     | SA     | 239 |
| 462 | IMMENF         | ----- | GRPMLCHNG | VPFI  | INDFIP   | -----       | T     | DS     | 224    |     |
| 463 | MPWRWYCPAKRHWV | ----- | DGKVP     | SFNGT | TPWVI    | NDEMNP      | GVLP  | -----  | --     | 145 |
| 464 | IMMENF         | ----- | GRPMLCHNG | IPFIV | NDFIPK   | NGVKVTE     | EDSEQ | -----  | KTEGQE | 239 |
| 465 | IMMENF         | ----- | GRPMLCHNG | VPFI  | INDFIP   | -----       | T     | DS     | 224    |     |
| 466 | IMMENF         | ----- | GRPMLCHNG | VPFI  | INDFIP   | -----       | T     | DS     | 224    |     |
| 467 | IMMENF         | ----- | GRPMLCHNG | VPFI  | INDFIP   | -----       | T     | DA     | 224    |     |
| 468 | IMMENF         | ----- | GRPMLCHNG | VPFI  | INDFIP   | -----       | T     | DA     | 224    |     |
| 469 | VMVENF         | ----- | GRPMLTHNG | VPFI  | INDFIP   | VAD         | ----- | NG     | GT     | 227 |
| 470 | IMMENF         | ----- | GRPMLCHNG | VPFI  | INDFIP   | -----       | T     | DS     | 224    |     |
| 471 | VVTLP          | ----- | GAEVPAYRG | VP    | IFRNDFIP | VNQTV       | ----- | GT     | ST     | 236 |
| 472 | QMMENF         | ----- | GRPMLTHNG | IP    | IIMNE    | FLSGAEVK    | ----- | GT     | SI     | 242 |
| 473 | VVTLP          | ----- | GAEVPAYRG | VP    | IFRNDFIP | VNQTV       | ----- | GT     | ST     | 236 |
| 474 | IMMENF         | ----- | GRPMLCHNG | VPFI  | INDFIP   | -----       | T     | DA     | 224    |     |
| 475 | IMMENF         | ----- | GRPMLCHNG | VPFI  | INDFIP   | -----       | T     | DS     | 224    |     |
| 476 | VYTMAS         | ----- | GRTVPAYRG | IP    | IFRNDWIP | INQTQ       | ----- | GT     | SA     | 239 |
| 477 | VVTLP          | ----- | GRQVPAYRG | VP    | IFRNDYI  | ATNQTK      | ----- | GT     | AT     | 235 |
| 478 | TLELPS         | ----- | GEEVLEYEG | VPVFR | NDWMP    | TNQTQ       | ----- | GT     | ST     | 235 |
| 479 | IYTMPS         | ----- | GRQVPAYRG | IP    | IFRNDWIP | INQTQ       | ----- | GT     | SV     | 239 |
| 480 | VVTLP          | ----- | GAEVPAYRG | VP    | IFRNDYI  | PTNQTK      | ----- | GT     | GT     | 236 |
| 481 | IMMENF         | ----- | GRPMLCHNG | VPFI  | INDFIP   | -----       | T     | DS     | 224    |     |



|     |        |                |               |      |        |
|-----|--------|----------------|---------------|------|--------|
| 482 | IMMENF | GRPMLCHNGVPFI  | INDFIP        | TD   | 224    |
| 483 | IMIENF | GRPMLTHNGIPFLV | NDFIPVAG      | DGNA | 227    |
| 484 | IMMENF | GRPMLCHNGVPFI  | INDFIP        | TD   | 224    |
| 485 | V--DAF | GRRALFYDGIPI   | IIVDDFIPIDETL | GAGS | 231    |
| 486 | IMIENF | GRPMLTHNGVPFIV | NDFIPVVG      | DAKA | 227    |
| 487 | IMMENF | GRPMLCHNGIPFI  | INDFIPK       | TE   | DG 226 |
| 488 | IMIENF | GRPMLTHNGVPFLV | NDFIPKTG      | DTKA | 227    |
| 489 | IMIENF | GRPMLTHNGVPFIV | NDFIPVVG      | DTKA | 227    |
| 490 | VYTMAS | GRTVPAYRGIPI   | IFRNDWIPITQTQ | GTAT | 239    |
| 491 | IMMENF | GRPMLCHNGVPFI  | INDFIP        | TD   | 224    |
| 492 | TLKLPS | GEEVLLEYEGVPV  | FRNDWMPNTNQTQ | GSST | 235    |
| 493 | IMMENF | GRPMLCHNGVPFIV | NDFIP         | VV   | D 225  |
| 494 | V--DAF | GRRALFYDGIPI   | ILVDDFISDSETL | GSGT | 231    |
| 495 | IMMENF | GRPMLCHNGVPFIV | NDFIP         | V    | D 225  |
| 496 | IMMENF | GRPMLCHNGVPFIV | NDFIP         | V    | D 225  |
| 497 | VLELPS | GRRVPVYRDIPI   | IFRNDFIPTDQTV | GTSD | 236    |
| 498 | IMMENF | GRPMLCHNGVPFI  | INDFIP        | T    | D 224  |
| 499 | IMIENF | GRPMLTHNGVPFLV | NDFIPKTG      | DTKA | 227    |
| 500 | VYTMAS | GRTVPAYRGIPI   | IFRNDWIPITQTQ | GTAT | 239    |

|    |    |    |     |   |       |     |         |        |       |       |        |        |         |         |          |          |       |       |     |
|----|----|----|-----|---|-------|-----|---------|--------|-------|-------|--------|--------|---------|---------|----------|----------|-------|-------|-----|
| 1  | L  | TT | --- | N | IWFAS | LG  | -----   | MDALHG | IIPEN | -     | VGDNMF | V      | TRNT    | -----   | 254      |          |       |       |     |
| 2  | L  | TT | --- | N | IWFAS | LG  | -----   | MDALHG | IIPEN | -     | VGDNMF | V      | TRNT    | -----   | 254      |          |       |       |     |
| 3  | P  | TT | --- | N | IWFAS | LG  | -----   | MDALHG | IIPEN | -     | VGDNMF | V      | TRKT    | -----   | 254      |          |       |       |     |
| 4  | P  | TT | --- | N | IWFAS | LG  | -----   | MDALHG | IIPEN | -     | VGDNMF | V      | TRKT    | -----   | 254      |          |       |       |     |
| 5  | P  | TT | --- | N | IWFAS | LG  | -----   | MDALHG | IIPEN | -     | VGDNMF | V      | TRKT    | -----   | 254      |          |       |       |     |
| 6  | P  | TT | --- | N | IWFAS | LG  | -----   | MDALHG | IIPEN | -     | VGDNMF | V      | TRKT    | -----   | 254      |          |       |       |     |
| 7  | P  | TT | --- | N | IWFAS | LG  | -----   | MDALHG | IIPEN | -     | VGDNMF | V      | TRKT    | -----   | 252      |          |       |       |     |
| 8  | S  | TT | --- | N | IWFAS | LG  | -----   | TDALHG | IIPEN | -     | VGDNMF | V      | TRKT    | -----   | 252      |          |       |       |     |
| 9  | P  | TT | --- | N | IWFAS | LG  | -----   | IDALHG | IIPEN | -     | VGDNMF | V      | TRKT    | -----   | 252      |          |       |       |     |
| 10 | S  | TT | --- | N | IWLAS | LG  | -----   | TDALHG | IIPEN | -     | VGDNMF | V      | TRKT    | -----   | 252      |          |       |       |     |
| 11 | L  | TT | --- | N | IWFAS | LG  | -----   | MDALHG | IIPEN | -     | VGNMNF | V      | TRKT    | -----   | 252      |          |       |       |     |
| 12 | P  | AT | --- | N | IWFAS | LG  | -----   | MDALHG | IIPEN | -     | VGDNMF | V      | TRKT    | -----   | 252      |          |       |       |     |
| 13 | S  | TT | --- | N | IWFAS | LG  | -----   | TDALHG | IIPEN | -     | VGDNMF | V      | TRKT    | -----   | 252      |          |       |       |     |
| 14 | P  | TT | --- | N | IWFVT | LG  | -----   | PG     | GMHG  | IIPES | -      | VGGNMF | V       | TRQT    | -----    | 252      |       |       |     |
| 15 | V  | AT | --- | N | IWFFV | LG  | -----   | QGNLHG | IMPEK | -     | ARS    | -      | I       | TRST    | -----    | 291      |       |       |     |
| 16 | L  | AT | --- | N | IWFL  | SLG | -----   | PGNLHG | IKPEK | -     | AQN    | -      | I       | TRST    | -----    | 291      |       |       |     |
| 17 | L  | AT | --- | N | IWFL  | SLG | -----   | PGNLHG | IKPEK | -     | AQN    | -      | I       | TRST    | -----    | 291      |       |       |     |
| 18 | L  | AT | --- | N | IWFFS | LG  | -----   | PGSLHG | IKPEK | -     | AQN    | -      | I       | TRST    | -----    | 291      |       |       |     |
| 19 | V  | GT | --- | N | IWFFT | LG  | -----   | ENNLHG | MTPAA | -     | LDRDLF | V      | TRST    | -----   | 290      |          |       |       |     |
| 20 | V  | AT | --- | N | IWFFV | LG  | -----   | QGNLHG | IMPEK | -     | AQS    | -      | I       | TRST    | -----    | 292      |       |       |     |
| 21 | T  | GT | --- | N | IWFFS | MG  | -----   | ENNLHG | MTPAA | -     | LDT    | GLF    | V       | TRST    | -----    | 290      |       |       |     |
| 22 | V  | GV | --- | N | IWFFS | LG  | -----   | ENNLHG | MTPAA | -     | LDT    | GLF    | V       | TRST    | -----    | 290      |       |       |     |
| 23 | T  | GT | --- | N | IWFFS | MG  | -----   | ENNLHG | MTPAA | -     | LDT    | GLF    | V       | TRST    | -----    | 291      |       |       |     |
| 24 | I  | GT | --- | N | IWFFS | MG  | -----   | ENNLHG | MTPAA | -     | LDT    | GLF    | V       | TRST    | -----    | 290      |       |       |     |
| 25 | I  | GT | --- | N | IWFFS | MG  | -----   | ENNLHG | MTPAA | -     | LDT    | GLF    | V       | TRST    | -----    | 290      |       |       |     |
| 26 | I  | GT | --- | N | IWFFS | MG  | -----   | ENNLHG | MTPAA | -     | LDT    | GLF    | V       | TRST    | -----    | 290      |       |       |     |
| 27 | L  | AT | --- | N | IWFFS | LG  | -----   | PGSLHG | IKPEK | -     | AQS    | -      | I       | TRST    | -----    | 291      |       |       |     |
| 28 | I  | GT | --- | N | IWFFS | MG  | -----   | ENNLHG | MTPAA | -     | LDT    | GLF    | V       | TRST    | -----    | 290      |       |       |     |
| 29 | A  | RG | --- | I | VFFMV | LG  | -DDRGP  | GHFR   | GISG  | I     | VPRG   | -      | RERNMFI | KRQVDG  | VVGD     | -        | IVVP  | 287   |     |
| 30 | A  | RG | --- | I | VFFMV | LG  | -DDRGP  | GHFR   | GISG  | I     | VPKG   | -      | RERNMFI | KRQVDG  | VVGD     | -        | IVVP  | 293   |     |
| 31 | S  | TG | --- | I | VFFMV | LG  | -DDKGP  | GHFR   | GITG  | I     | VPKG   | -      | RERNMFI | KRQTDG  | HTD      | ---      | ---   | 284   |     |
| 32 | S  | RG | --- | I | VFFMV | LG  | -DDKGP  | GHFR   | GITG  | I     | VPKG   | -      | RERDMFI | KRQTAG  | HTD      | ---      | ---   | 284   |     |
| 33 | S  | TG | --- | I | VFFMV | LG  | -DDKGP  | GHFR   | GITG  | I     | VPKG   | -      | RERDMFI | KRQTDG  | VVSM     | -        | TLDP  | 289   |     |
| 34 | S  | LT | --- | K | IYFMV | LG  | -DSGEA  | GPTR   | GITG  | I     | VP     | GP     | -       | LKDTMF  | FIRRESSE | PV       | ---   | ---   | 298 |
| 35 | N  | LT | --- | R | IYFMV | VG  | -ENCDRG | -IH    | GVTG  | I     | VL     | LD     | -       | LKDKLF  | V        | RR       | EAAEP | ----- | 298 |
| 36 | S  | TT | --- | N | IWFAS | LG  | -----   | TDALHG | IIPEN | -     | VGDNMF | V      | TRKT    | -----   | 175      |          |       |       |     |
| 37 | F  | YT | --- | R | IYFMV | LG  | -DACESG | PVR    | GITG  | I     | VP     | GP     | -       | LKDTLF  | FIRRESTE | PA       | ---   | ---   | 294 |
| 38 | N  | QG | --- | I | IYFMV | LG  | -DDEGPG | HER    | GIVGL | V     | PRD    | -      | LADTWF  | IKREANG | VVGT     | -        | QVIT  | 287   |     |
| 39 | -- | VT | --- | N | IWFTY | TG  | -----   | PN     | GLFG  | I     | PHL    | -      | KDGS    | LF      | FRKRQV   | -----    | ---   | 267   |     |
| 40 | N  | LT | --- | K | IYFMV | LG  | -DACEAG | PVR    | GITG  | I     | VP     | GP     | -       | IKPTMF  | V        | RHETAEP  | ----- | ---   | 286 |
| 41 | -- | TT | --- | N | MWFS  | LG  | -----   | LN     | GLCG  | I     | PPK    | -      | EN      | GSMF    | RI       | RQV      | ----- | ---   | 250 |
| 42 | E  | TG | --- | I | IYFMV | LG  | -DDGGPG | HSR    | GITGL | V     | PQG    | -      | MRDRWF  | V       | RRDANGL  | VGTGEATV | G     | 289   |     |

|     |          |           |               |              |                     |                    |     |
|-----|----------|-----------|---------------|--------------|---------------------|--------------------|-----|
| 43  | E-TG---- | IIFYFMVL  | LG-DDGGPGHYRG | ITGLVPKK--   | LEHGW               | VVKRESNGVSGTGEALVT | 288 |
| 44  | E-TG---- | IIFYFMVL  | LG-DDGGPGHYRG | ITGLVPQG--   | FENRWF              | VRRDANGLVGTGEATVG  | 289 |
| 45  | D-QG---- | IIFYFMVL  | LG-DDEGPGHERG | IVGLVPHD--   | LSDTWFIKREANGVIGT-- | QTIT               | 287 |
| 46  | G-VE---- | RTYFMVVG  | -DDGKSGPTRG   | VTGIVPAH--   | LGSEMF              | IKRTVPALV-----     | 275 |
| 47  | T-PE---- | RTYFMVVG  | -DDGNAGPTRG   | VTGIVPAH--   | LGRNMF              | IKRTVPAIISVE-----  | 274 |
| 48  | G-TE---- | RTYFMVVG  | -DDGKAGPTRG   | VTGIVPAN--   | LGREMF              | IKRTVPALV-----     | 273 |
| 49  | G-VE---- | RTYFMVVG  | -DDGKAGPTRG   | VTGIVPAH--   | LGREMF              | IKRTVPALV-----     | 275 |
| 50  | G-TE---- | RTYFMVVG  | -DDGKAGPTRG   | VTGIVPAH--   | MGREMF              | IKRTVPALL-----     | 273 |
| 51  | --GE---- | YIFYFMVTG | -DDGGKGPTRG   | VTGILPRQ--   | QMSNPF              | NKRVRVQGIYNPD----- | 272 |
| 52  | V-DR---- | RIYFMVMG  | -DDGGPGHTRG   | ITCIRPAD--   | LMNRRY              | IKRAVNGVPDF-----   | 276 |
| 53  | T-----   | SIYALVL   | LG-RE-----    | GIYGV        | IPEG--              | FQGRMIRANRA-----   | 276 |
| 54  | N-LT---- | RIYMMVVG  | -EVCDRQ-IH    | GVTVGIVPKD-- | LENKLF              | FIRREAAEP-----     | 279 |
| 55  | T-----   | SVYALVL   | LG-QE-----    | GLHG         | IVPAG--             | TKNSMFRVARS-----   | 278 |
| 56  | T-RG---- | IVFFMVL   | LG-DDKGPGRF   | RG-----      | -----               | -----              | 258 |
| 57  | S-NQ---- | RIYFMVL   | LG-DDGGEGTTRG | VTGIVPQH--   | LISWPF              | VKRVNTNGTHTFD----- | 278 |
| 58  | N-LT---- | RIYMMVMG  | -EDCERQ-IY    | GVTVGIIPKD-- | LEGKLF              | FIRRESAEP-----     | 283 |
| 59  | T-----   | SIYALVVG  | -RE-----      | GLYGV        | IPRG--              | FGGRMFRIQAG-----   | 276 |
| 60  | A-DR---- | RIYFMVL   | LG-DDDGKGPTRG | LTIRMVPAG--  | MEYNPF              | ILRMTNGVPDF-----   | 277 |
| 61  | T-----   | SVYALVL   | LG-QD-----    | GLHG         | IVPQG--             | TKDSMFRVART-----   | 278 |
| 62  | G-TE---- | RTYFMVVG  | -DDGKASPTRG   | VTGIVPAH--   | LGSEMF              | IKRTVPALLPGP-----  | 276 |
| 63  | P-DR---- | RIYFIVMG  | -DDGGKGPTRG   | LTGIRPAD--   | MMNRPY              | VKRAVNGVPDF-----   | 276 |
| 64  | T-----   | SIYALVL   | LG-RE-----    | GIYGV        | IPRG--              | SEGRMIQAARV-----   | 276 |
| 65  | T-----   | SVYALAL   | LG-RE-----    | GLHG         | IVPRG--             | TRESMFRVSKS-----   | 278 |
| 66  | --GE---- | YIFFMVTG  | -DDGGQGPTRG   | VTGITPRQ--   | QVGRMF              | NKRTVQGIIFAPD----- | 272 |
| 67  | G-AQ---- | RIYFMVL   | LG-DDGSSGPTRG | VTGIVPQE--   | LLHSMF              | VKRVVPAAYNIE-----  | 280 |
| 68  | T-----   | KIWFFKFG  | -----         | RRHIHG       | IVPASG--            | GRRSMFKIRS-----    | 273 |
| 69  | T-----   | KIWFKVL   | LG-----       | RRHIHG       | IVPASS--            | GTRSMFKVRS-----    | 289 |
| 70  | -----    | NVYFMVMG  | -DNGHHTPGH    | GLQLIMPQV--  | RRGDMF              | VKRHIPITPSND-----  | 284 |
| 71  | -----    | NVYFMVMG  | -DNGHHTPGH    | GLQLILPQV--  | RRGDMF              | VKRHIPITPSND-----  | 335 |
| 72  | -----    | NVYFMVMG  | -DNGHHTPGH    | GLQLILPQV--  | RRGDMF              | VKRHIPITPSND-----  | 330 |
| 73  | -----    | NVYFMVL   | LG-DNGHHTPGH  | GLQLIMPAA--  | RRGDMF              | VKRHIPITPTAD-----  | 284 |
| 74  | T-TC---- | SIYAARFN  | -EAD-----     | GLHGI        | YGGG--              | SAGIRIEDIG-----    | 265 |
| 75  | T-PE---- | RTYFMVVG  | -DDGGAGPTRG   | VSS--PRH--   | -----               | -----              | 254 |
| 76  | A-RG---- | IVFFMVL   | LG-DDRGPGHFRG | ISGIVPRG--   | RERNMF              | IKRQVDGVVGD--IVVP  | 222 |
| 77  | A-DR---- | RIWFMVL   | LG-DDGGKGHTRG | LTRIVPAG--   | MERSPF              | ILRMTNGVPDF-----   | 277 |
| 78  | N-SC---- | SIYAMRLN  | -TAD-----     | GFHGI        | YGGD--              | SAGLVFEDLG-----    | 264 |
| 79  | -----    | -----     | -----         | -----        | -----               | -----              | 223 |
| 80  | A-TA---- | SIYAMRLN  | -EVD-----     | GLHGI        | FGGG--              | NAGFVVEDIG-----    | 265 |
| 81  | A-AT---- | SIYAMRLN  | -EVD-----     | GLHAI        | YGGG--              | SAGIVVEDIG-----    | 266 |
| 82  | A-TG---- | SIYAVRLN  | -EVD-----     | GLHGI        | YGGG--              | NAGFSVEDIG-----    | 265 |
| 83  | A-TC---- | SIYALRLN  | -EAD-----     | GFHGI        | FGGG--              | SAGIQFEEIG-----    | 265 |
| 84  | E-TC---- | SIYALRLN  | -EAD-----     | GFHGI        | YGGG--              | SAGIQFEEIG-----    | 265 |
| 85  | A-TC---- | SIYALRLN  | -EAD-----     | GFHGI        | YGGGA--             | SAGIQFEEIG-----    | 265 |
| 86  | A-TC---- | SIYALRLN  | -EAD-----     | GFHGI        | YGGG--              | SAGIQFEEIG-----    | 265 |
| 87  | -----    | NIYFMVL   | LG-DNGEARPGH  | GLTMIMPAE--  | RMGNPY              | VEREWPMKTDG-----   | 275 |
| 88  | N-LT---- | RIYMMVVG  | -EVCDRQ-IH    | GVTVGIVPKD-- | LENKYF              | FIRREAHEP-----     | 230 |
| 89  | A-TC---- | SVYALRLN  | -EAD-----     | GFHGI        | YGGGP--             | SAGIQFEEIG-----    | 265 |
| 90  | A-TC---- | SIYALRLN  | -ETD-----     | GFHGI        | YGGGP--             | NAGIQVESIG-----    | 265 |
| 91  | T-EE---- | RTFFMVMG  | -DDGGQGPTRG   | VTGIVPAA--   | QGRNLF              | NRRRIEGVFAAD-----  | 233 |
| 92  | -----    | NIYFMVL   | LG-DNGEARPGH  | GLTMIMPAE--  | RRGNPY              | VEREWPMKTDG-----   | 275 |
| 93  | -----    | NIYFMVL   | LG-DNGEARPGH  | GLTMIMPAE--  | RRGNPY              | IEREWPMKTDG-----   | 275 |
| 94  | R-TA---- | PIFAARLN  | -ETD-----     | GLHGI        | FGGGA--             | SAGVRMEEIG-----    | 262 |
| 95  | E-TT---- | SIYALRLN  | -EAD-----     | GFHGI        | FGGGP--             | SAGIQFEDIG-----    | 265 |
| 96  | D-TC---- | SVYALRLN  | -ELD-----     | GLHGI        | YGGGG--             | NAGIVVENLG-----    | 265 |
| 97  | T-TC---- | SIYALRLN  | -EVD-----     | GIHGLY       | GGGA--              | SAGLRVEEIG-----    | 265 |
| 98  | N-TC---- | SVYALRLN  | -EVD-----     | GLHGLY       | GGGA--              | SAGIRVEDIG-----    | 265 |
| 99  | N-TC---- | SIYALRLN  | -EAD-----     | GFHGI        | YGGGA--             | SAGLRVEEIG-----    | 265 |
| 100 | N-TT---- | SIYAVRLN  | -EVD-----     | GLHGLY       | GGGA--              | SAGVRVEDIG-----    | 265 |
| 101 | A-CC---- | SIYAMRLN  | -VAD-----     | GLHGLY       | GGGP--              | ELGIRIEDVG-----    | 265 |
| 102 | T-VS---- | NIYMMVL   | GANNKDPQGP    | FVTGIIPKQNV  | QPD                 | TMFMRRESNIVY-----  | 286 |
| 103 | N-TC---- | SVYALRLN  | -EVD-----     | GLHGLY       | GGGA--              | SAGIRVEDIG-----    | 265 |
| 104 | K-TC---- | SIYAIRAN  | -EVD-----     | GLHGI        | YGGGG--             | PAGIVVENIG-----    | 265 |
| 105 | K-TT---- | SIYAVRLN  | -EVD-----     | GLHGLY       | GGGG--              | NAGIVVEDIG-----    | 265 |
| 106 | K-TT---- | SIYAVRLN  | -EVD-----     | GLHGLY       | GGGG--              | NAGIVVEDIG-----    | 263 |
| 107 | --TC---- | SVYAVRMN  | -ELD-----     | GLHGI        | YGGGD--             | NAGIVVENIG-----    | 260 |
| 108 | K-TT---- | SIYAVRLN  | -EVD-----     | GLHGLY       | GGGG--              | NAGIVVEDIG-----    | 265 |
| 109 | K-TT---- | SIYAVRLN  | -EVD-----     | GLHGLY       | GGGG--              | NAGIVVEDIG-----    | 265 |

|     |          |     |       |          |     |           |     |     |   |   |   |   |   |   |   |       |       |       |     |
|-----|----------|-----|-------|----------|-----|-----------|-----|-----|---|---|---|---|---|---|---|-------|-------|-------|-----|
| 110 | K-TT---- | SIY | AVRLN | EVD----- | GLH | GLYGGG    | --- | NAG | I | V | V | E | D | I | G | ----- | 265   |       |     |
| 111 | N-LC---- | SVY | AARFN | ESD----- | GLH | AIYGGD    | --- | NAG | I | V | V | E | D | I | G | ----- | 264   |       |     |
| 112 | K-TT---- | SIY | AVRLN | EVD----- | GLH | GLYGGG    | --- | NAG | I | V | V | E | D | I | G | ----- | 267   |       |     |
| 113 | K-TT---- | SIY | AVRLN | EVD----- | GLH | GLYGGG    | --- | NAG | I | V | V | E | D | I | G | ----- | 265   |       |     |
| 114 | K-TT---- | SIY | AVRLN | EVD----- | GLH | GLYGGG    | --- | NAG | I | V | V | E | D | I | G | ----- | 265   |       |     |
| 115 | N-TC---- | SVY | ALRLN | EVD----- | GVH | GLFGGE    | --- | SAG | I | R | I | E | D | I | G | ----- | 266   |       |     |
| 116 | SKSC---- | YIY | AARFN | EVD----- | GVH | GLFGGP    | --- | NAG | M | V | V | E | D | I | G | ----- | 262   |       |     |
| 117 | K-TC---- | SIY | AIRAN | EVD----- | GLH | GIYGGG    | --- | PAG | I | V | V | E | N | I | G | ----- | 265   |       |     |
| 118 | K-TC---- | SIY | AIRAN | EVD----- | GLH | GIYGGG    | --- | PAG | I | V | V | E | N | I | G | ----- | 265   |       |     |
| 119 | SKSC---- | YIY | AARFN | EVD----- | GVH | GLFGGP    | --- | NAG | M | V | V | E | D | I | G | ----- | 262   |       |     |
| 120 | S-TC---- | SVY | AVRAN | ELD----- | GLH | GLYGGA    | --- | SAG | I | R | V | E | T | I | G | ----- | 266   |       |     |
| 121 | K-TT---- | SIY | AVRLN | EVD----- | GLH | GLYGGG    | --- | NAG | I | V | V | E | D | I | G | ----- | 265   |       |     |
| 122 | K-TT---- | SIY | AGRLN | EVD----- | GLH | GLYGGG    | --- | NAG | I | V | V | E | D | I | G | ----- | 265   |       |     |
| 123 | A-TC---- | SVY | ALRLN | EAD----- | GLH | GLYGGE    | --- | SAG | I | V | V | E | N | L | G | ----- | 265   |       |     |
| 124 | N-TT---- | SIY | AVRLN | EVD----- | GLH | GLYGGG    | --- | NAG | I | V | V | E | D | I | G | ----- | 265   |       |     |
| 125 | N-TT---- | SIY | AVRLN | EVD----- | GLH | GLYGGG    | --- | NAG | I | V | V | E | D | I | G | ----- | 265   |       |     |
| 126 | K-TT---- | SIY | AVRLN | EVD----- | GLH | GLYGGG    | --- | NAG | I | V | V | E | D | I | G | ----- | 265   |       |     |
| 127 | A-ST---- | SIY | ALRLN | EVD----- | GVH | GLYGGA    | --- | TAG | L | R | V | E | E | I | G | ----- | 265   |       |     |
| 128 | A-ST---- | SIY | ALRLN | EVD----- | GIH | GLYGGA    | --- | TAG | L | R | V | E | E | I | G | ----- | 265   |       |     |
| 129 | K-TC---- | SIY | AVRLN | ELD----- | GMH | GLWGGK    | --- | DAG | I | R | V | E | D | V | G | ----- | 265   |       |     |
| 130 | K-TC---- | SIY | AVRLN | ELD----- | GMH | GLWGGK    | --- | DAG | I | R | V | E | D | V | G | ----- | 265   |       |     |
| 131 | K-TC---- | SIY | AVRLN | ELD----- | GMH | GLWGGK    | --- | DAG | I | R | V | E | D | V | G | ----- | 265   |       |     |
| 132 | K-TT---- | SIY | AVRLN | EVD----- | GLH | GLYGGG    | --- | NAG | I | V | V | E | D | I | G | ----- | 265   |       |     |
| 133 | N-CT---- | TIF | AGCID | DGSR---- | KV  | GLTGLTARN | --- | AY  | G | L | E | V | E | Q | V | G     | ----- | 271   |     |
| 134 | K-TC---- | SVY | AIRLN | ELD----- | GMH | GLWGGK    | --- | DAG | I | R | V | E | D | V | G | ----- | 265   |       |     |
| 135 | K-TT---- | SIY | AVRLN | EVD----- | GLH | GLYGGG    | --- | NAG | I | V | V | E | D | I | G | ----- | 265   |       |     |
| 136 | SEVC---- | PIY | AMRLN | EVD----- | GLH | GLYGGN    | --- | NAG | I | V | V | E | N | I | G | ----- | 261   |       |     |
| 137 | K-SC---- | SIY | AVRFN | EAD----- | GMH | GIFGGP    | --- | TAG | F | R | V | Q | S | I | G | ----- | 265   |       |     |
| 138 | A-TT---- | SVY | ALRLN | ELD----- | GLH | GIYGGG    | --- | DAG | I | V | V | E | N | I | G | ----- | 268   |       |     |
| 139 | V-TT---- | SIY | ALRLN | EVD----- | GFH | GIVGGE    | --- | AAG | L | K | V | E | E | I | G | ----- | 265   |       |     |
| 140 | K-KA     | PIY | ALHLS | EEN----- | GVT | GLYGGD    | --- | NAG | I | V | V | E | S | I | G | ----- | 262   |       |     |
| 141 | A-TT---- | SVY | ALRLN | EDD----- | GLH | GLHGGG    | --- | AAG | I | R | L | E | A | L | G | ----- | 267   |       |     |
| 142 | E-TC---- | SIY | ALRLN | EAD----- | GLH | GIYGGH    | --- | SAG | V | R | M | E | E | I | G | ----- | 265   |       |     |
| 143 | K-KA     | PIY | ALHLS | EEN----- | GVT | GLYGGD    | --- | NAG | I | V | V | E | S | I | G | ----- | 262   |       |     |
| 144 | A-TC---- | SIY | ALRLN | EAD----- | GFH | GIYGGA    | --- | NAG | V | Q | L | E | D | I | G | ----- | 265   |       |     |
| 145 | D-LT---- | SIY | ALRLN | ETD----- | GFH | MLYGGE    | --- | SAG | I | V | V | E | N | V | G | ----- | 265   |       |     |
| 146 | K-TA     | SIY | AVRFN | EAD----- | GMH | GIFGGP    | --- | QAG | L | R | V | S | H | V | G | ----- | 265   |       |     |
| 147 | D-SA     | NIY | CLHLS | EEN----- | GVT | GLYGGE    | --- | NAG | I | V | V | E | N | I | G | ----- | 259   |       |     |
| 148 | D-SA     | NIY | CLHLS | EEN----- | GVT | GLYGGE    | --- | NAG | I | V | V | E | N | I | G | ----- | 259   |       |     |
| 149 | D-SA     | NIY | CLHLS | EEN----- | GVT | GLYGGE    | --- | NAG | I | V | V | E | N | I | G | ----- | 259   |       |     |
| 150 | T-TA     | NIY | CLHLS | EEN----- | GVT | GLYGGE    | --- | NAG | I | V | V | E | N | I | G | ----- | 259   |       |     |
| 151 | G-TA     | NIY | CLHLS | EEN----- | GLT | GLYGGD    | --- | NAG | I | V | V | E | N | I | G | ----- | 272   |       |     |
| 152 | T-TA     | NIY | CLHLS | EEN----- | GVT | GLYGGE    | --- | NAG | I | V | V | E | N | I | G | ----- | 259   |       |     |
| 153 | A-TC---- | SIY | ALRLN | EAD----- | GFH | GIYGGA    | --- | NAG | V | Q | L | E | D | I | G | ----- | 265   |       |     |
| 154 | D-AA     | NIY | CLHLS | EEN----- | GVT | GLYGGE    | --- | NAG | I | V | V | E | N | I | G | ----- | 259   |       |     |
| 155 | G-TA     | NIY | CLHLS | EEN----- | GLT | GLYGGD    | --- | NAG | I | V | V | E | N | I | G | ----- | 272   |       |     |
| 156 | T-TA     | NIY | CLHLS | EEN----- | GVT | GLYGGE    | --- | N   | V | G | I | V | V | E | N | I     | G     | ----- | 259 |
| 157 | T-SA     | NIY | CLHLS | EEN----- | GVT | GLYGGE    | --- | NAG | I | V | V | E | N | I | G | ----- | 259   |       |     |
| 158 | G-TA     | NIY | CLHLS | EEN----- | GLT | GLYGGD    | --- | NAG | I | V | V | E | N | I | G | ----- | 272   |       |     |
| 159 | G-TA     | NIY | CLHLS | EEN----- | GLT | GLYGGD    | --- | NAG | I | V | V | E | N | I | G | ----- | 272   |       |     |
| 160 | G-TA     | NIY | CLHLS | EEN----- | GLT | GLYGGD    | --- | NAG | I | V | V | E | N | I | G | ----- | 272   |       |     |
| 161 | K-TC---- | SIY | AIRAN | EVD----- | GLH | GIYGGG    | --- | PAG | I | V | V | E | N | I | G | ----- | 265   |       |     |
| 162 | V-TT---- | SVY | ALRLN | EYD----- | GLH | GLYGGG    | --- | TAG | V | V | V | E | D | I | G | ----- | 272   |       |     |
| 163 | G-TA     | NIY | CLHLS | EEN----- | GLT | GLYGGD    | --- | NAG | I | V | V | E | N | I | G | ----- | 272   |       |     |
| 164 | T-AA     | NIY | CLHLS | EEN----- | GVT | GLYGGE    | --- | NAG | I | V | V | E | N | I | G | ----- | 259   |       |     |
| 165 | T-GA     | NIY | CLHLS | EEN----- | GVT | GLYGGE    | --- | NAG | I | V | V | E | N | I | G | ----- | 259   |       |     |
| 166 | T-AA     | NIY | CLHLS | EEN----- | GVT | GLYGGE    | --- | NAG | I | V | V | E | N | I | G | ----- | 259   |       |     |
| 167 | D-SA     | NIY | CLHLS | EEN----- | GVT | GLYGGE    | --- | NAG | I | V | V | E | N | I | G | ----- | 259   |       |     |
| 168 | T-GA     | NIY | CLHLS | EEN----- | GVT | GLYGGE    | --- | NAG | I | V | V | E | N | I | G | ----- | 259   |       |     |
| 169 | D-SA     | NIY | CLHLS | EEN----- | GVT | GLYGGE    | --- | NAG | I | V | V | E | N | I | G | ----- | 259   |       |     |
| 170 | G-KA     | SIY | CLHLS | EEN----- | GVT | GLYGGD    | --- | NAG | I | V | V | E | N | I | G | ----- | 257   |       |     |
| 171 | T-GA     | NIY | CLHLS | EEN----- | GVT | GLYGGE    | --- | NAG | I | V | V | E | N | I | G | ----- | 259   |       |     |
| 172 | G-TA     | NIY | CLHLS | EEN----- | GLT | GLYGGD    | --- | NAG | I | V | V | E | N | I | G | ----- | 272   |       |     |
| 173 | S-KA     | SIY | CLHLS | EEN----- | GVT | GLYGGD    | --- | NAG | I | V | V | E | N | I | G | ----- | 257   |       |     |
| 174 | G-KA     | SIY | CLHLS | EEN----- | GVT | GLYGGD    | --- | NAG | I | V | V | E | N | I | G | ----- | 257   |       |     |
| 175 | G-KA     | SIY | CLHLS | EEN----- | GVT | GLYGGD    | --- | NAG | I | V | V | E | N | I | G | ----- | 257   |       |     |
| 176 | D-SA     | NIY | CLHLS | EEN----- | GVT | GLYGGE    | --- | NAG | I | V | V | E | N | I | G | ----- | 259   |       |     |

|     |      |     |          |     |     |           |     |            |     |     |
|-----|------|-----|----------|-----|-----|-----------|-----|------------|-----|-----|
| 177 | G-TA | --- | NIYCLHLS | EEN | --- | GLTGLYGGD | --- | NAGIVVENIG | --- | 272 |
| 178 | G-TA | --- | NIYCLHLS | EEN | --- | GLTGLYGGD | --- | NAGIVVENIG | --- | 272 |
| 179 | G-KA | --- | SIYCLHLS | EEN | --- | GVTGLYGGD | --- | NAGIVVENIG | --- | 257 |
| 180 | T-GA | --- | NIYCLHLS | EEN | --- | GVTGLYGGE | --- | NAGIVVENIG | --- | 259 |
| 181 | G-KA | --- | SIYCLHLS | EEN | --- | GVTGLYGGD | --- | NAGIVVENIG | --- | 257 |
| 182 | G-KA | --- | SIYCLHLS | EEN | --- | GVTGLYGGD | --- | NAGIVVESIG | --- | 257 |
| 183 | G-KA | --- | SIYCLHLS | EEN | --- | GVTGLYGGD | --- | NAGIVVENIG | --- | 257 |
| 184 | G-KA | --- | SIYCLHLS | EEN | --- | GVTGLYGGD | --- | NAGIVVENIG | --- | 257 |
| 185 | G-TA | --- | NIYCLHLS | EEN | --- | GLTGLYGGD | --- | NAGIVVENIG | --- | 272 |
| 186 | G-KA | --- | SIYCLHLS | EEN | --- | GVTGLYGGD | --- | NAGIVVENIG | --- | 257 |
| 187 | G-KA | --- | SIYCLHLS | EEN | --- | GVTGLYGGD | --- | NAGIVVENIG | --- | 257 |
| 188 | G-KA | --- | SIYCLHLS | EEN | --- | GVTGLYGGD | --- | NAGIVVENIG | --- | 257 |
| 189 | G-KA | --- | SIYCLHLS | EEN | --- | GVTGLYGGD | --- | NAGIVVENIG | --- | 257 |
| 190 | D-CT | --- | SIWFIQFG | MMR | --- | GVIIGLE   | --- | NGGIVHEDVG | --- | 261 |
| 191 | G-TA | --- | NIYCLHLS | EEN | --- | GLTGLYGGD | --- | NAGIVVENIG | --- | 272 |
| 192 | K-TT | --- | SIYALRLN | EAD | --- | GFHGLWAGA | --- | QAGIRYEHLG | --- | 264 |
| 193 | G-KA | --- | SIYCLHLS | EEN | --- | GVTGLYGGD | --- | NAGIVVENIG | --- | 257 |
| 194 | G-KA | --- | SIYCLHLS | EEN | --- | GVTGLYGGD | --- | NAGIVVENIG | --- | 257 |
| 195 | G-KA | --- | SIYCLHLS | EEN | --- | GVTGLYGGD | --- | NAGIVVENIG | --- | 257 |
| 196 | G-KA | --- | SIYCLHLS | EEN | --- | GVTGLYGGD | --- | NAGIVVENIG | --- | 257 |
| 197 | G-KA | --- | SIYCLHLS | EEN | --- | GVTGLYGGD | --- | NAGIVVENIG | --- | 257 |
| 198 | G-KA | --- | SIYCLHLS | EEN | --- | GVTGLYGGD | --- | NAGIVVENIG | --- | 257 |
| 199 | G-KA | --- | SIYCLHLS | EEN | --- | GVTGLYGGD | --- | NAGIVVENIG | --- | 257 |
| 200 | G-KA | --- | SIYCLHMS | EEN | --- | GVTGLYGGD | --- | NAGIVVENIG | --- | 257 |
| 201 | G-KA | --- | SIYCLHLS | EEN | --- | GVTGLYGGD | --- | NAGIVVENIG | --- | 257 |
| 202 | E-TC | --- | SIYALRLN | ETD | --- | GFHGIYGGP | --- | TAGVQFEDIG | --- | 264 |
| 203 | G-KA | --- | SIYCLHLS | EEN | --- | GVTGLYGGD | --- | NAGIVVENIG | --- | 257 |
| 204 | GNTC | --- | SVYAARLN | EVD | --- | GLHGLYGGD | --- | NAGLVVENIG | --- | 267 |
| 205 | G-KA | --- | SIYCLHLS | EEN | --- | GVTGLYGGD | --- | NAGIVVENIG | --- | 257 |
| 206 | G-KA | --- | SIYCLHLS | EEN | --- | GVTGLYGGD | --- | NAGIVVENIG | --- | 257 |
| 207 | G-KA | --- | SIYCLHLS | EEN | --- | GVTGLYGGD | --- | NAGIVVENIG | --- | 257 |
| 208 | G-KA | --- | SIYCLHLS | EEN | --- | GVTGLYGGD | --- | NAGIVVENIG | --- | 257 |
| 209 | G-KA | --- | SIYCLHLS | EEN | --- | GVTGLYGGD | --- | NAGIVVENIG | --- | 257 |
| 210 | G-KA | --- | SIYCLHLS | EEN | --- | GVTGLYGGD | --- | NAGIVVENIG | --- | 257 |
| 211 | G-KA | --- | SIYCLHLS | EEN | --- | GVTGLYGGD | --- | NAGIVVENIG | --- | 257 |
| 212 | G-KA | --- | SIYCLHLS | EEN | --- | GVTGLYGGD | --- | NAGIVVENIG | --- | 257 |
| 213 | G-KA | --- | SIYCLHLS | EEN | --- | GVTGLYGGD | --- | NAGIVVENIG | --- | 257 |
| 214 | G-TA | --- | NIYCLHLS | EEN | --- | GLTGLYGGD | --- | NAGIVVENIG | --- | 272 |
| 215 | G-KA | --- | SIYCLHLS | EEN | --- | GVTGLYGGD | --- | NAGIVVENIG | --- | 257 |
| 216 | G-KA | --- | SIYCLHLS | EEN | --- | GVTGLYGGD | --- | NAGIVVENIG | --- | 257 |
| 217 | G-KA | --- | SIYCLHLS | EES | --- | GVTGLYGGD | --- | NAGIVVENIG | --- | 257 |
| 218 | G-KA | --- | SIYCLHLS | EEN | --- | GVTGLYGGD | --- | NAGIVVENIG | --- | 257 |
| 219 | G-KA | --- | SIYCLHLS | EEN | --- | GVTGLYGGD | --- | NAGIVVENIG | --- | 257 |
| 220 | G-KA | --- | SIYCLHLS | EEN | --- | GVTGLYGGD | --- | NAGIVVENIG | --- | 257 |
| 221 | G-KA | --- | SIYCLHLS | EEN | --- | GVTGLYGGD | --- | NAGIVVENIG | --- | 257 |
| 222 | G-KA | --- | SIYCLHLS | EEN | --- | GVTGLYGGD | --- | NAGIVVENIG | --- | 257 |
| 223 | G-KA | --- | SIYCLHLS | EEN | --- | GVTGLYGGD | --- | NAGIVVENIG | --- | 257 |
| 224 | G-KA | --- | SIYCLHLS | EEN | --- | GVTGLYGGD | --- | NAGIVVENIG | --- | 257 |
| 225 | G-KA | --- | SIYCLHLS | EEN | --- | GVTGLYGGE | --- | NAGIVVENIG | --- | 257 |
| 226 | G-KA | --- | SIYCLHLS | EEN | --- | GVTGLYGGD | --- | NAGIVVENIG | --- | 257 |
| 227 | G-KA | --- | SIYCLHLS | EEN | --- | GVTGLYGGD | --- | NAGIVVENIG | --- | 257 |
| 228 | --TC | --- | PIYAIRAN | ELD | --- | GLHGLFGGD | --- | NAGIVVENLG | --- | 258 |
| 229 | G-KA | --- | SIYCLHLS | EEN | --- | GVTGLYGGD | --- | NAGIVVENIG | --- | 257 |
| 230 | --TC | --- | QIYAIRAN | ELD | --- | GLHGLFGGD | --- | NAGIVVENLG | --- | 258 |
| 231 | G-KA | --- | SIYCLHLS | EEN | --- | GVTGLYGGD | --- | NAGIVVENIG | --- | 257 |
| 232 | G-TA | --- | NIYCLHLS | EEN | --- | GLTGLYGGD | --- | NAGIVVENIG | --- | 272 |
| 233 | G-KA | --- | SIYCLHLS | EEN | --- | GVTGLYGGD | --- | NAGIVVENIG | --- | 257 |
| 234 | G-KA | --- | SIYCLHLS | EEN | --- | GVTGLYGGD | --- | NAGIVVENIG | --- | 257 |
| 235 | G-KA | --- | SIYCLHLS | EEN | --- | GVTGLYGGD | --- | NAGIVVENIG | --- | 257 |
| 236 | G-KA | --- | SIYCLHLS | EEN | --- | GVTGLYGGD | --- | NAGIVVENIG | --- | 257 |
| 237 | G-KA | --- | SIYCLHLS | EEN | --- | GVTGLYGGD | --- | NAGIVVENIG | --- | 257 |
| 238 | G-KA | --- | SIYCLHMS | EEN | --- | GVTGLYGGD | --- | NAGIVVENIG | --- | 257 |
| 239 | N-LS | --- | SIYAVKFG | -PS | --- | GLMGLE    | --- | NGGITVEEVG | --- | 260 |
| 240 | G-TA | --- | NIYCLHLS | EEN | --- | GLTGLYGGD | --- | NAGIVVENIG | --- | 272 |
| 241 | G-KA | --- | SIYCLHLS | EEN | --- | GVTGLYGGE | --- | NAGIVVENIG | --- | 257 |
| 242 | G-KA | --- | SIYCLHLS | EEN | --- | GVTGLYGGD | --- | NAGIVVENIG | --- | 257 |
| 243 | G-KA | --- | SIYCLHLS | EEN | --- | GVTGLYGGD | --- | NAGIVVENIG | --- | 257 |





|     |      |     |          |      |     |             |      |            |     |     |
|-----|------|-----|----------|------|-----|-------------|------|------------|-----|-----|
| 311 | G-KA | --- | SIYCLHLS | EEN  | --- | GVTGLYGG    | E--- | NAGIVVENIG | --- | 257 |
| 312 | T-KA | --- | DIYCLHLS | EEN  | --- | GVTGLYGG    | D--- | NAGIVVENIG | --- | 258 |
| 313 | G-KA | --- | SIYCLHLS | EEN  | --- | GVTGLYGG    | D--- | NAGIVVENIG | --- | 257 |
| 314 | G-KA | --- | SIYCLHLS | EEN  | --- | GVTGLYGG    | E--- | NAGIVVENIG | --- | 257 |
| 315 | G-KA | --- | SIYCLHLS | EEN  | --- | GVTGLYGG    | D--- | NAGIVVENIG | --- | 257 |
| 316 | T-KA | --- | DIYCLHLS | EEN  | --- | GVTGLYGG    | E--- | NAGIVVENIG | --- | 258 |
| 317 | T-AA | --- | DIYCLHLS | EEN  | --- | GVTGLYGG    | E--- | NAGIVVENIG | --- | 259 |
| 318 | T-KA | --- | DIYCLHLS | EEN  | --- | GVTGLYGG    | E--- | NAGIVVENIG | --- | 258 |
| 319 | T-KA | --- | DIYCLHLS | EEN  | --- | GVTGLYGG    | E--- | NAGIVVENIG | --- | 258 |
| 320 | G-KA | --- | SIYCLHLS | EEN  | --- | GVTGLYGG    | E--- | NAGIVVENIG | --- | 257 |
| 321 | T-KA | --- | DIYCLHLS | EEN  | --- | GVTGLYGG    | E--- | NAGIVVENIG | --- | 258 |
| 322 | G-KA | --- | SIYCLHLS | EEN  | --- | GVTGLYGG    | E--- | NAGIVVENIG | --- | 257 |
| 323 | G-KA | --- | SIYCLHLS | EEN  | --- | GVTGLYGG    | E--- | NAGIVVENIG | --- | 257 |
| 324 | G-KA | --- | SIYCLHLS | EEN  | --- | GVTGLYGG    | D--- | NAGIVVENIG | --- | 257 |
| 325 | G-KA | --- | SIYCLHLS | EEN  | --- | GVTGLYGG    | D--- | NAGIVVENIG | --- | 257 |
| 326 | T-KA | --- | DIYCLHLS | EEN  | --- | GVTGLYGG    | E--- | NAGIVVENIG | --- | 258 |
| 327 | T-KA | --- | DIYCLHLS | EEN  | --- | GVTGLYGG    | E--- | NAGIVVENIG | --- | 258 |
| 328 | T-KA | --- | DIYCLHLS | EEN  | --- | GVTGLYGG    | E--- | NAGIVVENIG | --- | 258 |
| 329 | G-KA | --- | SIYCLHLS | EEN  | --- | GVTGLYGG    | E--- | NAGIVVENIG | --- | 257 |
| 330 | G-KA | --- | SIYCLHLS | EEN  | --- | GVTGLYGG    | E--- | NAGIVVENIG | --- | 257 |
| 331 | T-KA | --- | DIYCLHLS | EEN  | --- | GVTGLYGG    | E--- | NAGIVVENIG | --- | 258 |
| 332 | G-KA | --- | SIYCLHLS | EEN  | --- | GVTGLYGG    | E--- | NAGIVVENIG | --- | 257 |
| 333 | G-KA | --- | SIYCLHLS | EEN  | --- | GVTGLYGG    | E--- | NAGIVVENIG | --- | 257 |
| 334 | T-AA | --- | DIYCLHLS | EEN  | --- | GVTGLYGG    | E--- | NAGIVVENIG | --- | 259 |
| 335 | G-KA | --- | SIYCLHLS | EEN  | --- | GVTGLYGG    | E--- | NAGIVVENIG | --- | 257 |
| 336 | G-KA | --- | SIYCLHLS | EEN  | --- | GVTGLYGG    | D--- | NAGIVVENIG | --- | 257 |
| 337 | G-KA | --- | SIYCLHLS | EEN  | --- | GVTGLYGG    | E--- | NAGIVVENIG | --- | 257 |
| 338 | T-KA | --- | DIYCLHLS | EEN  | --- | GVTGLYGG    | E--- | NAGIVVENIG | --- | 258 |
| 339 | G-KA | --- | SIYCLHLS | EEN  | --- | GVTGLYGG    | E--- | NAGIVVENIG | --- | 257 |
| 340 | T-KA | --- | DIYCLHLS | EEN  | --- | GVTGLYGG    | E--- | NAGIVVENIG | --- | 258 |
| 341 | G-KA | --- | SIYCLHLS | EEN  | --- | GVTGLYGG    | E--- | NAGIVVENIG | --- | 257 |
| 342 | G-TA | --- | NIYCLHLS | EEN  | --- | GLTGLYGG    | D--- | NAGIVVENIG | --- | 272 |
| 343 | G-KA | --- | SIYCLHLS | EEN  | --- | GVTGLYGG    | E--- | NAGIVVENIG | --- | 257 |
| 344 | G-KA | --- | SIYCLHMS | EEN  | --- | GVTGLYGG    | E--- | NAGIVVENIG | --- | 257 |
| 345 | T-KA | --- | DIYCLHLS | EEN  | --- | GVTGLYGG    | E--- | NAGIVVENIG | --- | 258 |
| 346 | G-KA | --- | SIYCLHLS | EEN  | --- | GVTGLYGG    | D--- | NAGIVVENIG | --- | 257 |
| 347 | G-KA | --- | SIYCLHLS | EEN  | --- | GVTGLYGG    | D--- | NAGIVVENIG | --- | 257 |
| 348 | S-AA | --- | DIYGLHLS | EEN  | --- | GVTGLYGG    | E--- | NAGIVVENIG | --- | 259 |
| 349 | G-KA | --- | SIYCLHLS | EEN  | --- | GVTGLYGG    | E--- | NAGIVVENIG | --- | 257 |
| 350 | G-KA | --- | SIYCLHLS | EEN  | --- | GVTGLYGG    | E--- | NAGIVVENIG | --- | 257 |
| 351 | K-TT | --- | SIYAVRLN | EVD  | --- | GLHGLYGG    | G--- | NAGIVVEDIG | --- | 246 |
| 352 | G-KA | --- | SIYCLHLS | EEN  | --- | GVTGLYGG    | E--- | NAGIVVENIG | --- | 257 |
| 353 | T-CT | --- | SVVAGTLD | DGSM | --- | QSGIAGLTAMD | ---  | ASGIQVEEVG | --- | 272 |
| 354 | T-KA | --- | DIYCLHLS | EEN  | --- | GVTGLYGG    | E--- | NAGIVVENIG | --- | 255 |
| 355 | T-AA | --- | DIYCLHLS | EEN  | --- | GVTGLYGG    | E--- | NAGIVVENIG | --- | 259 |
| 356 | G-KA | --- | SIYCLHLS | EEN  | --- | GVTGLYGG    | E--- | NAGIVVENIG | --- | 257 |
| 357 | T-KA | --- | DIYCLHLS | EEN  | --- | GVTGLYGG    | E--- | NAGIVVENIG | --- | 258 |
| 358 | G-KA | --- | SIYCLHLS | EEN  | --- | GVTGLYGG    | E--- | NAGIVVENIG | --- | 257 |
| 359 | T-KA | --- | DIYCLHLS | EEN  | --- | GVTGLYGG    | E--- | NAGIVVENIG | --- | 258 |
| 360 | G-KA | --- | SIYCLHLS | EEN  | --- | GVTGLYGG    | E--- | NAGIVVENIG | --- | 257 |
| 361 | D-AA | --- | DIYCLHLS | EEN  | --- | GVTGLYGG    | D--- | NAGIVVENIG | --- | 259 |
| 362 | T-KA | --- | DIYCLHLS | EEN  | --- | GVTGLYGG    | E--- | NAGIVVENIG | --- | 258 |
| 363 | G-KA | --- | SIYCLHLS | EEN  | --- | GVTGLYGG    | E--- | NAGIVVENIG | --- | 257 |
| 364 | G-KA | --- | SIYCLHLS | EEN  | --- | GVTGLYGG    | E--- | NAGIVVENIG | --- | 257 |
| 365 | G-KA | --- | SIYCLHLS | EEN  | --- | GVTGLYGG    | E--- | NAGIVVENIG | --- | 257 |
| 366 | G-KA | --- | SIYCLHLS | EEN  | --- | GVTGLYGG    | E--- | NAGIVVENIG | --- | 257 |
| 367 | A-AA | --- | DIYGLHLS | EEN  | --- | GVTGLYGG    | E--- | NAGIVVENIG | --- | 259 |
| 368 | A-AA | --- | DIYGLHLS | EEN  | --- | GVTGLYGG    | E--- | NAGIVVENIG | --- | 259 |
| 369 | G-KA | --- | SIYCLHLS | EEN  | --- | GVTGLYGG    | E--- | NAGIVVENIG | --- | 257 |
| 370 | G-KA | --- | SIYCLHLS | EEN  | --- | GVTGLYGG    | E--- | NAGIVVENIG | --- | 257 |
| 371 | G-KA | --- | SIYCLHLS | EEN  | --- | GVTGLYGG    | E--- | NAGIVVENIG | --- | 257 |
| 372 | G-KA | --- | SIYCLHLS | EEN  | --- | GVTGLYGG    | E--- | NAGIVVENIG | --- | 257 |
| 373 | G-KA | --- | SIYCLHLS | EEN  | --- | GVTGLYGG    | E--- | NAGIVVENIG | --- | 257 |
| 374 | G-KA | --- | SIYCLHLS | EEN  | --- | GVTGLYGG    | D--- | NAGIVVENIG | --- | 257 |
| 375 | G-KA | --- | SIYCLHLS | EEN  | --- | GVTGLYGG    | E--- | NAGIVVENIG | --- | 257 |
| 376 | G-KA | --- | SIYCLHLS | EEN  | --- | GVTGLYGG    | D--- | NAGIVVENIG | --- | 257 |
| 377 | G-LS | --- | SIYAVKWG | -PS  | --- | GLMGLE      | ---  | NGGIVVEEVG | --- | 260 |

|     |          |     |           |      |      |              |     |             |       |     |
|-----|----------|-----|-----------|------|------|--------------|-----|-------------|-------|-----|
| 378 | G-KA     | --- | SIYCLHLS  | EEN  | ---- | GVTGLYGG     | E-- | NAGIVVENIG  | ----- | 257 |
| 379 | G-KA     | --- | SIYCLHLS  | EEN  | ---- | GVTGLYGG     | E-- | NAGIVVENIG  | ----- | 257 |
| 380 | S-AA     | --- | DIYGLHLS  | EEN  | ---- | GVTGLYGG     | E-- | NAGIVVENIG  | ----- | 259 |
| 381 | S-AA     | --- | DIYGLHLS  | EEN  | ---- | GVTGLYGG     | E-- | NAGIVVENIG  | ----- | 259 |
| 382 | A-CT     | --- | TIFAGVFD  | DGDM | ---  | KTGLLGLTAAN  | --- | AYGMHVVDVG  | ----- | 271 |
| 383 | A-AA     | --- | DIYGLHLS  | EEN  | ---- | GVTGLYGG     | E-- | NAGIVVENIG  | ----- | 259 |
| 384 | A-AA     | --- | DIYGLHLS  | EEN  | ---- | GVTGLYGG     | E-- | NAGIVVENIG  | ----- | 259 |
| 385 | G-KA     | --- | SIYCLHLS  | EEN  | ---- | GVTGLYGG     | E-- | NAGIVVENIG  | ----- | 257 |
| 386 | G-KA     | --- | SIYCLHLS  | EEN  | ---- | GVTGLYGGD    | --- | NAGIVVENIG  | ----- | 257 |
| 387 | L-TGGSFR | SVY | AMRLN     | EAD  | ---- | GLFGVYGG     | S-- | EAAGFTVEDIG | ----- | 272 |
| 388 | S-AA     | --- | DIYGLHLS  | EEN  | ---- | GVTGLYGG     | E-- | NAGIVVENIG  | ----- | 259 |
| 389 | T-KA     | --- | DIYCLHLS  | EEN  | ---- | GVTGLYGG     | E-- | NAGIVVENIG  | ----- | 258 |
| 390 | N-CT     | --- | TILAGVLD  | DGSR | ---  | KVGVTGLTAKN  | --- | AYGLAVEPVG  | ----- | 271 |
| 391 | A-AA     | --- | DIYGLHLS  | EEN  | ---- | GVTGLYGG     | E-- | NAGIVVENIG  | ----- | 259 |
| 392 | G-KA     | --- | SIYCLHLS  | EEN  | ---- | GVTGLYGG     | E-- | NAGIVVENIG  | ----- | 257 |
| 393 | G-KA     | --- | SIYCLHLS  | EEN  | ---- | GVTGLYGG     | E-- | NAGIVVENIG  | ----- | 257 |
| 394 | A-AA     | --- | DIYGLHLS  | EEN  | ---- | GVTGLYGG     | E-- | NAGIVVENIG  | ----- | 259 |
| 395 | A-AA     | --- | DIYGLHLS  | EEN  | ---- | GVTGLYGG     | E-- | NAGIVVENIG  | ----- | 259 |
| 396 | G-TA     | --- | NIYCLHLS  | EEN  | ---- | GLTGLYGG     | E-- | NAGIVVENIG  | ----- | 271 |
| 397 | N-AT     | --- | SVFAGTFD  | DGSR | ---  | THGIAGLTAER  | --- | QAGMHIKYVG  | ----- | 275 |
| 398 | G-KA     | --- | SIYCLHLS  | EEN  | ---- | GVTGLYGGD    | --- | NAGIVVENIG  | ----- | 257 |
| 399 | S-TA     | --- | DIFCLHLS  | EEN  | ---- | GVTGLYGG     | E-- | NAGIVVENIG  | ----- | 259 |
| 400 | T-AA     | --- | DIYGLHLS  | EEN  | ---- | GVTGLYGG     | E-- | NAGIVVENIG  | ----- | 259 |
| 401 | S-AA     | --- | DIYGLHLS  | EEN  | ---- | GVTGLYGG     | E-- | NAGIVVENIG  | ----- | 259 |
| 402 | S-AA     | --- | DIYGLHLS  | EEN  | ---- | GVTGLYGG     | E-- | NAGIVVENIG  | ----- | 259 |
| 403 | T-KA     | --- | DIYCLHLS  | EEN  | ---- | GVTGLYGG     | E-- | NAGIVVENIG  | ----- | 258 |
| 404 | T-KA     | --- | DIYCLHLS  | EEN  | ---- | GVTGLYGG     | E-- | NAGIVVENIG  | ----- | 258 |
| 405 | G-KA     | --- | SIYCLHLS  | EEN  | ---- | GVTGLYGGD    | --- | NAGIVVENIG  | ----- | 257 |
| 406 | A-AA     | --- | DIYGLHLS  | EEN  | ---- | GVTGLYGG     | E-- | NAGIVVENIG  | ----- | 259 |
| 407 | T-KA     | --- | DIYCLHLS  | EEN  | ---- | GVTGLYGG     | E-- | NAGIVVENIG  | ----- | 258 |
| 408 | G-KA     | --- | SIYCLHLS  | EEN  | ---- | GVTGLYGG     | E-- | NAGIVVENIG  | ----- | 257 |
| 409 | A-AA     | --- | DIYGLHLS  | EEN  | ---- | GVTGLYGG     | E-- | NAGIVVENIG  | ----- | 259 |
| 410 | A-AA     | --- | DIYGLHLS  | EEN  | ---- | GVTGLYGG     | E-- | NAGIVVENIG  | ----- | 259 |
| 411 | A-AA     | --- | DIYGLHLS  | EEN  | ---- | GVTGLYGG     | E-- | NAGIVVENIG  | ----- | 259 |
| 412 | A-AA     | --- | DIYGLHLS  | EEN  | ---- | GVTGLYGG     | E-- | NAGIVVENIG  | ----- | 259 |
| 413 | G-KA     | --- | SIYCLHLS  | EEN  | ---- | GVTGLYGGD    | --- | NAGIVVENIG  | ----- | 257 |
| 414 | A-AA     | --- | DIYGLHLS  | EEN  | ---- | GVTGLYGG     | E-- | NAGIVVENIG  | ----- | 259 |
| 415 | A-AA     | --- | DIYGLHLS  | EEN  | ---- | GVTGLYGG     | E-- | NAGIVVENIG  | ----- | 259 |
| 416 | A-AA     | --- | DIYGLHLS  | EEN  | ---- | GVTGLYGG     | E-- | NAGIVVENIG  | ----- | 259 |
| 417 | G-TA     | --- | NIYCLHLS  | EEN  | ---- | GLTGLYGG     | E-- | NAGIVVENIG  | ----- | 271 |
| 418 | G-KA     | --- | SIYCLHLS  | EEN  | ---- | GVTGLYGG     | E-- | NAGIVVENIG  | ----- | 257 |
| 419 | A-TT     | --- | SVYALRLN  | EID  | ---- | GFHGLYGGN    | --- | AAGIRIDDLG  | ----- | 265 |
| 420 | A-AA     | --- | DIYGLHLS  | EEN  | ---- | GVTGLYGG     | E-- | NAGIVVENIG  | ----- | 259 |
| 421 | G-KA     | --- | SIYCLHLS  | EEN  | ---- | GVTGLYGGD    | --- | NAGIVVENIG  | ----- | 257 |
| 422 | G-TA     | --- | NIYCLHLS  | EEN  | ---- | GLTGLYGGD    | --- | NAGIVVENIG  | ----- | 272 |
| 423 | G-TA     | --- | NIYCLHLS  | EEN  | ---- | GLTGLYGG     | E-- | NAGIVVENIG  | ----- | 271 |
| 424 | A-AA     | --- | DIYGLHLS  | EEN  | ---- | GVTGLYGG     | E-- | NAGIVVENIG  | ----- | 259 |
| 425 | G-TA     | --- | NIYCLHLS  | EEN  | ---- | GLTGLYGGD    | --- | NAGIVVENIG  | ----- | 272 |
| 426 | G-TA     | --- | NIYCLHLS  | EEN  | ---- | GLTGLYGGD    | --- | NAGIVVENIG  | ----- | 272 |
| 427 | G-TA     | --- | NIYCLHLS  | EEN  | ---- | GLTGLYGGD    | --- | NAGIVVENIG  | ----- | 272 |
| 428 | S-AA     | --- | DIYGLHLS  | EEN  | ---- | GVTGLYGG     | E-- | NAGIVVENIG  | ----- | 259 |
| 429 | G-KA     | --- | SIYCLHLS  | EEN  | ---- | GVTGLYGGD    | --- | NAGIVVENIG  | ----- | 257 |
| 430 | G-TA     | --- | NIYCLHLS  | EEN  | ---- | GLTGLYGGD    | --- | NAGIVVENIG  | ----- | 272 |
| 431 | A-AA     | --- | DIYGLHLS  | EEN  | ---- | GVTGLYGG     | E-- | NAGIVVENIG  | ----- | 259 |
| 432 | A-QT     | --- | TIFAGTLD  | DGSR | ---  | THGIAGLTAAN  | --- | DAGIVIEDVG  | ----- | 271 |
| 433 | G-KA     | --- | SIYCLHLS  | EEN  | ---- | GVTGLYGGD    | --- | NAGIVVENIG  | ----- | 257 |
| 434 | T-KA     | --- | DIYCLHLS  | EEN  | ---- | GVTGLYGG     | E-- | NAGIVVENIG  | ----- | 258 |
| 435 | T-KA     | --- | DIYCLHLS  | EEN  | ---- | GVTGLYGG     | E-- | NAGIVVENIG  | ----- | 258 |
| 436 | A-AA     | --- | DIYGLHLS  | EEN  | ---- | GVTGLYGG     | E-- | NAGIVVENIG  | ----- | 259 |
| 437 | G-KA     | --- | SIYGLHMS  | EEN  | ---- | GLTGLYGGD    | --- | NAGIVVENIG  | ----- | 257 |
| 438 | A-AA     | --- | DIYGLHLS  | EEN  | ---- | GVTGLYGG     | E-- | NAGIVVENIG  | ----- | 259 |
| 439 | --TC     | --- | QIFALRAN  | ELD  | ---- | GLHGLYGG     | E-- | NAGIVVENIG  | ----- | 258 |
| 440 | G-KA     | --- | SIYCLHLS  | EEN  | ---- | GVTGLYGGD    | --- | NAGIVVENIG  | ----- | 257 |
| 441 | G-LS     | --- | SIYAVKWG  | -PS  | ---- | GLMGLE       | --- | NGGIVVEEVG  | ----- | 260 |
| 442 | Q-KA     | --- | DIYCLHMS  | EEN  | ---- | GLTGLYGGD    | --- | TAGIVVEDIG  | ----- | 260 |
| 443 | G-KA     | --- | SIYCLHLS  | EEN  | ---- | GVTGLYGG     | E-- | NAGIVVENIG  | ----- | 257 |
| 444 | T-CT     | --- | SI IAGCLD | DGSR | ---  | KVG IAGLHAKK | --- | AMGIQVKALG  | ----- | 271 |

|     |      |     |          |            |     |     |           |      |                   |            |       |     |     |     |     |     |
|-----|------|-----|----------|------------|-----|-----|-----------|------|-------------------|------------|-------|-----|-----|-----|-----|-----|
| 445 | A-QT | --- | TVFAGVFD | -DGDR      | --- | KT  | GLAGL     | TATN | ---               | AFGLH      | VERVG | --- | --- | --- | --- | 271 |
| 446 | G-KA | --- | SIYCLHLS | -EEN       | --- | --- | GVTGLYGGD | ---  | NAGIVVENIG        | ---        | ---   | --- | --- | --- | --- | 257 |
| 447 | G-KA | --- | SIYCLHLS | -EEN       | --- | --- | GVTGLYGGD | ---  | NAGIVVENIG        | ---        | ---   | --- | --- | --- | --- | 257 |
| 448 | N-LS | --- | SIYAVKFG | -SA        | --- | --- | GVMGLE    | ---  | NGGIQVVRVG        | ---        | ---   | --- | --- | --- | --- | 258 |
| 449 | G-KA | --- | SIYCLHLS | -EEN       | --- | --- | GVTGLYGGD | ---  | NAGIVVENIG        | ---        | ---   | --- | --- | --- | --- | 257 |
| 450 | G-KA | --- | SIYCLHLS | -EEN       | --- | --- | GVTGLYGGD | ---  | NAGIVVENIG        | ---        | ---   | --- | --- | --- | --- | 257 |
| 451 | N-LS | --- | SIYAVKFG | -PS        | --- | --- | GLMGLE    | ---  | NGGITVEEVG        | ---        | ---   | --- | --- | --- | --- | 260 |
| 452 | N-LS | --- | SIYAVKFG | -PS        | --- | --- | GVMGIE    | ---  | NGGIQIEAIG        | ---        | ---   | --- | --- | --- | --- | 260 |
| 453 | A-AA | --- | DIYGLHLS | -EEN       | --- | --- | GVTGLYGGE | ---  | NAGIVVENIG        | ---        | ---   | --- | --- | --- | --- | 259 |
| 454 | N-AT | --- | SVFAGTFD | -DGSR      | --- | TH  | GIAGL     | TAER | ---               | QAGMHIKYVG | ---   | --- | --- | --- | --- | 275 |
| 455 | S-TC | --- | SIYAVRLN | -ELD       | --- | --- | GFHGLWGGK | ---  | DAGIRVEDVG        | ---        | ---   | --- | --- | --- | --- | 265 |
| 456 | T-KA | --- | DIYCLHLS | -EEN       | --- | --- | GVTGLYGGE | ---  | NAGIVVENIG        | ---        | ---   | --- | --- | --- | --- | 258 |
| 457 | G-KA | --- | SIYCLHLS | -EEN       | --- | --- | GVTGLYGGD | ---  | NAGIVVENIG        | ---        | ---   | --- | --- | --- | --- | 257 |
| 458 | A-AA | --- | DIYGLHLS | -EEN       | --- | --- | GVTGLYGGE | ---  | NAGIVVENIG        | ---        | ---   | --- | --- | --- | --- | 259 |
| 459 | N-LA | --- | SVYAVRAN | -ELD       | --- | --- | GFHGLYGGD | ---  | AAGVRVEAIG        | ---        | ---   | --- | --- | --- | --- | 265 |
| 460 | G-KA | --- | SIYCLHLS | -EEN       | --- | --- | GVTGLYGGD | ---  | NAGIVVENIG        | ---        | ---   | --- | --- | --- | --- | 257 |
| 461 | N-AT | --- | SVFAGTFD | -DGSR      | --- | TH  | GIAGL     | TAER | ---               | QAGMHVKYVG | ---   | --- | --- | --- | --- | 275 |
| 462 | G-KA | --- | SIYCLHLS | -EEN       | --- | --- | GVTGLYGGD | ---  | NAGIVVENIG        | ---        | ---   | --- | --- | --- | --- | 257 |
| 463 | A-NR | --- | RIWFMVLG | -DDGGKGPTR | --- | --- | GLSRIVPAG | ---  | MERRPFVVRMTNGVPDF | ---        | ---   | --- | --- | --- | --- | 191 |
| 464 | G-TA | --- | NIYCLHLS | -EEN       | --- | --- | GLTGLYGGD | ---  | NAGIVVENIG        | ---        | ---   | --- | --- | --- | --- | 272 |
| 465 | G-KA | --- | SIYCLHLS | -EEN       | --- | --- | GVTGLYGGD | ---  | NAGIVVENIG        | ---        | ---   | --- | --- | --- | --- | 257 |
| 466 | G-KA | --- | SIYCLHLS | -EEN       | --- | --- | GVTGLYGGD | ---  | NAGIVVENIG        | ---        | ---   | --- | --- | --- | --- | 257 |
| 467 | G-KA | --- | SIYCLHLS | -EEN       | --- | --- | GVTGLYGGD | ---  | NAGIVVENIG        | ---        | ---   | --- | --- | --- | --- | 257 |
| 468 | G-KA | --- | SIYCLHLS | -EEN       | --- | --- | GVTGLYGGD | ---  | NAGIVVENIG        | ---        | ---   | --- | --- | --- | --- | 257 |
| 469 | K-SA | --- | SIYCLHMS | -EEN       | --- | --- | GLTGLYGGD | ---  | NAGIVVEDIG        | ---        | ---   | --- | --- | --- | --- | 260 |
| 470 | G-KA | --- | SIYCLHLS | -EEN       | --- | --- | GVTGLYGGD | ---  | NAGIVVENIG        | ---        | ---   | --- | --- | --- | --- | 257 |
| 471 | N-CT | --- | TVFAGTFD | -DGSR      | --- | TH  | GIAGL     | TAE  | ---               | AAGIQIEDVG | ---   | --- | --- | --- | --- | 272 |
| 472 | A-TA | --- | SVYALRLN | -EQD       | --- | --- | GLHGLYGGD | ---  | NAGIVVENIG        | ---        | ---   | --- | --- | --- | --- | 275 |
| 473 | N-CT | --- | TVFAGTFD | -DGSR      | --- | TH  | GIAGL     | TAE  | ---               | AAGIQIEDVG | ---   | --- | --- | --- | --- | 272 |
| 474 | G-KA | --- | SIYCLHLS | -EEN       | --- | --- | GVTGLYGGD | ---  | NAGIVVENIG        | ---        | ---   | --- | --- | --- | --- | 257 |
| 475 | G-KA | --- | SIYCLHLS | -EEN       | --- | --- | GVTGLYGGD | ---  | NAGIVVENIG        | ---        | ---   | --- | --- | --- | --- | 257 |
| 476 | N-AT | --- | SVFAGTFD | -DGSR      | --- | TH  | GIAGL     | TAER | ---               | QAGMHVKYVG | ---   | --- | --- | --- | --- | 275 |
| 477 | N-TT | --- | TLFAGTLD | -DGSG      | --- | KH  | GIAGL     | TAAG | ---               | EAGIRVTEIG | ---   | --- | --- | --- | --- | 271 |
| 478 | N-CT | --- | SIIAGCLD | -DGSQ      | --- | RV  | GIAGL     | HAKK | ---               | AMGIQVKDIG | ---   | --- | --- | --- | --- | 271 |
| 479 | N-AT | --- | SVFAGTFD | -DGSR      | --- | TH  | GIAGL     | TAAT | ---               | EAGVKIKYVG | ---   | --- | --- | --- | --- | 275 |
| 480 | N-TT | --- | SIFAGTLD | -DGSR      | --- | TH  | GLAGL     | TAE  | ---               | AAGIRVEDVG | ---   | --- | --- | --- | --- | 272 |
| 481 | G-KA | --- | SIYCLHLS | -EEN       | --- | --- | GVTGLYGGD | ---  | NAGIVVENIG        | ---        | ---   | --- | --- | --- | --- | 257 |
| 482 | G-KA | --- | SIYCLHLS | -EEN       | --- | --- | GVTGLYGGD | ---  | NAGIVVENIG        | ---        | ---   | --- | --- | --- | --- | 257 |
| 483 | K-KS | --- | DIFCLHMS | -EEN       | --- | --- | GLTGLYGGE | ---  | NAGIVVEDIG        | ---        | ---   | --- | --- | --- | --- | 260 |
| 484 | G-KA | --- | SIYCLHLS | -EEN       | --- | --- | GVTGLYGGD | ---  | NAGIVVENIG        | ---        | ---   | --- | --- | --- | --- | 257 |
| 485 | N-LS | --- | SIYAVKFG | -PS        | --- | --- | GVMGIE    | ---  | NGGIQIEAIG        | ---        | ---   | --- | --- | --- | --- | 260 |
| 486 | K-KS | --- | DIYCLHMS | -EEN       | --- | --- | GLTGLYGGD | ---  | TAGIVVEDIG        | ---        | ---   | --- | --- | --- | --- | 260 |
| 487 | A-AA | --- | DIYGLHLS | -EEN       | --- | --- | GVTGLYGGE | ---  | NAGIVVENIG        | ---        | ---   | --- | --- | --- | --- | 259 |
| 488 | Q-KA | --- | DIYCLHLS | -EEN       | --- | --- | GLTGLYGGD | ---  | NAGIVVEDIG        | ---        | ---   | --- | --- | --- | --- | 260 |
| 489 | K-KA | --- | DIYCLHLS | -EEN       | --- | --- | GLTGLYGGD | ---  | NAGIVVESIG        | ---        | ---   | --- | --- | --- | --- | 260 |
| 490 | N-AT | --- | SVFAGTFD | -DGSR      | --- | TH  | GIAGL     | TAEK | ---               | QAGMHVKYVG | ---   | --- | --- | --- | --- | 275 |
| 491 | G-KA | --- | SIYCLHLS | -EEN       | --- | --- | GVTGLYGGD | ---  | NAGIVVENIG        | ---        | ---   | --- | --- | --- | --- | 257 |
| 492 | T-ST | --- | SIVAGCLD | -DGSQ      | --- | RV  | GIAGL     | HAKK | ---               | AMGIQVKNIG | ---   | --- | --- | --- | --- | 271 |
| 493 | T-KA | --- | DIYCLHLS | -EEN       | --- | --- | GVTGLYGGD | ---  | NAGIVVENIG        | ---        | ---   | --- | --- | --- | --- | 258 |
| 494 | G-LS | --- | SIYAVKFG | -PA        | --- | --- | GLMGLE    | ---  | HGGIQVERVG        | ---        | ---   | --- | --- | --- | --- | 260 |
| 495 | T-KA | --- | DIYCLHLS | -EEN       | --- | --- | GVTGLYGGE | ---  | NAGIVVENIG        | ---        | ---   | --- | --- | --- | --- | 258 |
| 496 | T-KA | --- | DIYCLHLS | -EEN       | --- | --- | GVTGLYGGE | ---  | NAGIVVENIG        | ---        | ---   | --- | --- | --- | --- | 258 |
| 497 | N-CT | --- | TVFAGTFD | -DGSG      | --- | MH  | GVSGITPTM | ---  | NAGMSVTEIG        | ---        | ---   | --- | --- | --- | --- | 272 |
| 498 | G-KA | --- | SIYCLHLS | -EEN       | --- | --- | GVTGLYGGD | ---  | NAGIVVENIG        | ---        | ---   | --- | --- | --- | --- | 257 |
| 499 | Q-KA | --- | DIYCLHLS | -EEN       | --- | --- | GLTGLYGGD | ---  | NAGIVVEDIG        | ---        | ---   | --- | --- | --- | --- | 260 |
| 500 | N-AT | --- | SVFAGTFD | -DGSR      | --- | TH  | GIAGL     | TAEK | ---               | QAGMHVKYVG | ---   | --- | --- | --- | --- | 275 |

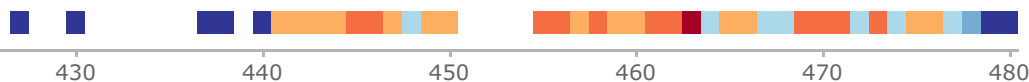

|   |       |                |         |             |          |     |
|---|-------|----------------|---------|-------------|----------|-----|
| 1 | ----- | IRTEGSEIVV---- | HKTWPVG | LALGSQAALSS | LKNVAI   | 288 |
| 2 | ----- | IRTEGSEIVV---- | HKTWPVG | LALGSQAALSS | LKNVAI   | 288 |
| 3 | ----- | LRTEGSEIVV---- | HKTWPVG | LALGSQAAL   | ASVKNVAI | 288 |
| 4 | ----- | IRTEGSEIVV---- | HKTWPVG | LALGSQAAL   | ASVKNVAI | 288 |
| 5 | ----- | VRTEGSEIVV---- | HKTWPVG | LALGSQAAL   | ASVKNVAI | 288 |

|    |                                   |                                           |     |
|----|-----------------------------------|-------------------------------------------|-----|
| 6  | -----IRTEGSEIVV----               | HKTWPVGLALGSQAALASVKNVAI--                | 288 |
| 7  | -----IRTEGSEIVV----               | HKTWPVGLALGSQAALASLKNVAI--                | 286 |
| 8  | -----VRTEGSEIVV----               | HKTWPVGLALGSQAALASVKNVAI--                | 286 |
| 9  | -----IRTEGSEIVV----               | HKTWPVGLALGSQAALASLKNVAI--                | 286 |
| 10 | -----VRTEGSEIVV----               | HKTWPVGLALGSQAALASVKNVAI--                | 286 |
| 11 | -----IRTEGSEIIL----               | HKTWPVGLALGSQAALASVNNVAI--                | 286 |
| 12 | -----LRTEGSEIVV----               | HKTWPVGLALGSQAALASVKNVAI--                | 286 |
| 13 | -----VRTEGSEIVV----               | HKTWPVGLALGSQAALASVKNVAIQ-                | 287 |
| 14 | -----SQADQSQTVV----               | SVTWPVGLALGSQGALSGILNVGIN-                | 287 |
| 15 | -----IQADASTLVY----               | HLTMPVGIALGSACALAVIKNATIPK                | 327 |
| 16 | -----ILADASTLVY----               | HLTMPVGIALGSSAALSVIRNATIPV                | 327 |
| 17 | -----ILADASTLVY----               | HLTMPVGIALGSSAALSVIRNATIPV                | 327 |
| 18 | -----ILADASTLVY----               | HLAMPVGIALGSAAALSVIKNVITPK                | 327 |
| 19 | -----MLPDGSTLVY----               | HVTMPVSIALGSASSLAVIKNVAIPS                | 326 |
| 20 | -----ILADASTLVY----               | HMMMPVGIALGSACALSVIKNATIPR                | 328 |
| 21 | -----MLPDGSTLVY----               | HVTMPASIALGSASSLAVIKNAVIPA                | 326 |
| 22 | -----MLPDGSTLVY----               | HVTMPASIALGSASSLAVIKNAVIPA                | 326 |
| 23 | -----MLPDGSTLVY----               | HVTMPASIALGSASSLAVIKNAVIPA                | 327 |
| 24 | -----MLPDGSTLVY----               | HVTMPASIALGSVSSLAVIKNAVIPA                | 326 |
| 25 | -----MLPDGSTLVY----               | HVTMPASIALGSASSLAVIKNALIPA                | 326 |
| 26 | -----MLPDGSTLVY----               | HVTMPASIALGSASSLAVIKNAVIPA                | 326 |
| 27 | -----ILADASTLVY----               | HLAMPVGIALGSSAALSVIRHATIPG                | 327 |
| 28 | -----MLPDGSTLVY----               | HVTMPASIALGSVSSLAVIKNAVIPA                | 326 |
| 29 | SQQVLVPDVPTTITVNGATI              | TPSLNAVTTN----WVSWPCGMAMGAQGSLSILKGFGL-V  | 342 |
| 30 | SQQVLVPDVPTTITVNGATI              | TPSLNAVTTN----WVSWPCGMAMGAQGSLSILKGFGL-V  | 348 |
| 31 | ----EVPEAP-----                   | YLKAITNT----WVSWPCGMAMGAQGSLSILKGFNL-V    | 323 |
| 32 | ----EVPEAP-----                   | YLKAITNT----WVSWPCGMAMGAQGSLSILKGFNL-V    | 323 |
| 33 | ---VTVPEVPTTIQPTG---              | SVTVNAITDT----WVSMPCGLAVGAQGSLSILKGFNL-V  | 338 |
| 34 | -----AASSTSQINV----               | DYTFPVATAMGSSGALAILEGVD--V                | 332 |
| 35 | -----SAATTSRINV----               | TYTFPVATAMGTQGALAILENVL--V                | 332 |
| 36 | -----VRTEGSEIVV----               | HKTWPVGLALGSQAALASVKNVAI--                | 209 |
| 37 | -----SAHSTSLINV----               | DYTFPVAIAMGSSGALSILDQVD--V                | 328 |
| 38 | ---APDPGKPF-----                  | TVQLPTLPTL-DT--WVSWPTGVAMGSQGSLSILSGFAL-V | 332 |
| 39 | -----TMPDGSETVG----               | QIFLPIGLALATESALAGITNIA--                 | 300 |
| 40 | -----STSTKSRICV----               | TYTFPVATAVGSSGALSILEGVD--V                | 320 |
| 41 | -----YDPDNGTIIIV----              | FVTWPVSIISLATKAALSAAVNNIAITP              | 286 |
| 42 | ---LDIPSVPPFIGSVLAPVTIPTLPTV-DT-- | WVSWPTGVAMGSQGSLSILRGFPL-V                | 340 |
| 43 | ---LDIPSVPPFIGTAEGAVTVPTLPTV-DT-- | WASWPTGIAMGSQGSLSILKGFNL-V                | 339 |
| 44 | ---LDIASVPFIGSVQAPVTIPTLPTV-DT--  | WVSWPTGVAMGSQGSLSILKGFNL-V                | 340 |
| 45 | ---VPDPGNPI-----                  | TVQLPTLPTL-DT--WVSWPTGIAMGSQGSRLAYP--KI-P | 330 |
| 46 | -----TIDGPGEDT----                | FVTMPAGIAGVGSQGALSIIQNYTT-V               | 309 |
| 47 | -----A-----                       | AESQPGEET----WVTMPAGIALGSQGALSIIENYTI-I   | 309 |
| 48 | -----TIDGPGEDT----                | FVTMPAGIAGVGSQGALSIIQNYTT-A               | 307 |
| 49 | -----TIDGPGEDT----                | FVTMPAGIAGVGSQGALSIIQNYTT-V               | 309 |
| 50 | -----PNDGPGEDT----                | FVTMPAGIAGVGSQGALSIIQNYTT-A               | 307 |
| 51 | -----AGGPGSPGMQPGIDV----          | WVSMPAGVAGVGSQGALSIIIRNFTT-V              | 312 |
| 52 | -----ANGEVNMARNV----              | WLTMPAGLAMGSQGSLSILTNFEN-V                | 312 |
| 53 | -----LVDGKGQDCW----               | VAYWPVGVAVLESQGGVARLQQVG--                | 309 |
| 54 | -----SGATSSQMRV----               | TYTFPVATAMGTGSALAVLKNVV--V                | 313 |
| 55 | -----LVDGKAQDNL----               | TVHWAVGLALASDQAIARLQKVAK-A                | 313 |
| 56 | -----                             | -----                                     | 258 |
| 57 | -----VGQ-----                     | TLPVRDM----WVSFSPGLAIGSQGATISMIQNFEPLV    | 314 |
| 58 | -----SAATTSRMNV----               | TYTYPTATAMGCASALAILENVL--V                | 317 |
| 59 | -----DVGDKGQRSW----               | VVSWPVSVAVLESQSGVARLQKVG--                | 309 |
| 60 | -----ANQTVNMTKDI----              | WLTMPAGIALGSQGALSMLTNFEH-V                | 313 |
| 61 | -----LIDGKAQDTN----               | TLYWAVGLALAAEQAVARLQKVS--                 | 311 |
| 62 | -----I-----                       | QPDAGPGEDT----FVTMPAGIAGVGSQGALSIIQNYTT-V | 312 |
| 63 | -----ANAEVNMARNI----              | WLTMPAGIALGSQGCLSILTNFAN-V                | 312 |
| 64 | -----LIDGKGQDGW----               | IAYWPVGVAVLESQAGVARLQQVG--                | 309 |
| 65 | -----LVDGKAQDQQ----               | IVSWAVGLALASEQAIARLEKVAS-S                | 313 |
| 66 | -----GGG-GQPAMLPGV DV----         | WVSTPAGYAGVGSQGALSIIIRNFTP-V              | 311 |
| 67 | -----AGI-----                     | GDPIAADDV----FLGWVPVGTAVGSPAATISLLQNFSA-A | 317 |
| 68 | -----TLSQGSIGIRY----              | DVVFVPAISVPAVSDIAVISNVLV--                | 307 |
| 69 | -----TLSQGSIGTRY----              | DVVFVPAISVPAVTDIAVISNVLV--                | 323 |
| 70 | -----PSADAGTLSSRNAVS----          | VIWPMGIAYGSAGAVSRLANITP-L                 | 323 |
| 71 | -----RGADTGTLASRHAVS----          | VIWPMGIAYGSAGAVSRLANITP-L                 | 374 |
| 72 | -----RGADTGTLASRHAVS----          | VIWPMGIAYGSAGAVSRLANITP-L                 | 369 |

|     |                                                 |                                         |       |     |
|-----|-------------------------------------------------|-----------------------------------------|-------|-----|
| 73  | -----RLADAGTLSSRQAISCIWPMGIAYGSAGAVSR           | LANITP-L                                | 323   |     |
| 74  | -----TVQTKDASRT-----RLKWYAAALALKSTKSLARIKGV     | VTN-S                                   | 300   |     |
| 75  | -----HQQSG-----                                 |                                         | 259   |     |
| 76  | SQQVLVPDVPTTITVNGATI                            | TPSLNAVTTN---WVSWPCGMAMGAQGSLSILKGFGL-V | 277   |     |
| 77  | -----ANQTVNMT-----                              |                                         | 285   |     |
| 78  | -----THATKDAMSF-----RMKWYVGTALKATHAVAR          | LKGITN-I                                | 299   |     |
| 79  | -----                                           |                                         | 223   |     |
| 80  | -----TVQNKDATRT-----RVKWCGLALKSTSTRSLARVRGV     | VTN-V                                   | 300   |     |
| 81  | -----TVQNKDATRT-----RLKWYCGTALKSTKSLARIQGIQN-I  | 301                                     |       |     |
| 82  | -----TVQNKDAQRF-----RMKWYVGTALKSTKSLARLKGVT     | TT-V                                    | 300   |     |
| 83  | -----TVQNKDASRY-----RVKWCAGTALKATHSVAR          | LKGILN-I                                | 300   |     |
| 84  | -----TIQNKDASRY-----RVKWCAGTALKATHSVAR          | LKGILN-I                                | 300   |     |
| 85  | -----TIQNKDASRY-----RVKWCAGTALKATHSVAR          | LKGILN-I                                | 300   |     |
| 86  | -----TIQNKDASRY-----RVKWCAGTALKATHSVAR          | LKGILN-I                                | 300   |     |
| 87  | -----SLTPTSTITR-----ALHWPVGYALGSMGAVSM          | LENITP-L                                | 310   |     |
| 88  | -----SGATTSTQTRV-----TYTFPVATAMGTGSALAILKNV     | V--V                                    | 264   |     |
| 89  | -----TIQNKDASRY-----RVKWCAGTALKATHSVAR          | LKGILN-I                                | 300   |     |
| 90  | -----TIQNKDAVRY-----RVKWCAGTALKATHSVAR          | LQGV                                    | VTN-V | 300 |
| 91  | -----AGA-GAPDMLPGVD                             | T---WVSMPAGLALGSQGALSIIENYTT-V          | 272   |     |
| 92  | -----SLTPTSTITR-----ALHWPVGYALGSMGAVSM          | LENITP-L                                | 310   |     |
| 93  | -----SLMPTSTITR-----ALHWPVGYALGSMGAVSM          | LENITP-L                                | 310   |     |
| 94  | -----TVQNKDAIRY-----RVKWCAGLALKSTKSLAKVADVAM-G  | 297                                     |       |     |
| 95  | -----TIQNKDASRY-----RVKWCAGTALKATHSVAR          | LKGILN-I                                | 300   |     |
| 96  | -----TVQNKDATRI-----RMKWYTGALALKSTKSVAR         | LKGVTN-I                                | 300   |     |
| 97  | -----KLQGKDAQRW-----RLKWYCGTALKATHSVAR          | LKGITN-V                                | 300   |     |
| 98  | -----TVQNKDATRT-----RLKWYCGLALKSTKSLAAVKGITN-V  | 300                                     |       |     |
| 99  | -----KLEGKDAQRW-----RLKWYAGTVLRATHSVAR          | LKGITN-V                                | 300   |     |
| 100 | -----TVQNKDATRT-----RLKWYVGLALKSTHSLAAIKGITN-V  | 300                                     |       |     |
| 101 | -----LVQNKDARRT-----RLKWYCGIALKSTKSLARIKGITN-I  | 300                                     |       |     |
| 102 | -----EGASGASELNV-----DYIFTAGVALGQEMALSIMRNARE-- | 321                                     |       |     |
| 103 | -----TVQNKDATRT-----RLKWYCGLALKSTKSLAAVKGITN-V  | 300                                     |       |     |
| 104 | -----TVQNKDATRI-----RLKWYVGLVLKSTKSLARLKGVTN-I  | 300                                     |       |     |
| 105 | -----TVQNKDATRT-----RIKWYCGLALKSTRSIAAIRGV      | VTN-I                                   | 300   |     |
| 106 | -----TVQNKDATRT-----RIKWYCGLALKSTRSIAAIRGV      | VTN-I                                   | 298   |     |
| 107 | -----TVQNKDATRI-----RLKWYAGLALKSTRSIAR          | LKGVTN-I                                | 295   |     |
| 108 | -----TVQNKDATRT-----RIKWYCGLALKSTRSIAAIRGV      | T--                                     | 298   |     |
| 109 | -----TVQNKDATRT-----RIKWYCGLALKSTRSIAAIRGV      | VTN--                                   | 299   |     |
| 110 | -----TVQNKDATRT-----RIKWYCGLALKSTRSIAAIRGV      | VTN-I                                   | 300   |     |
| 111 | -----TVQNKDATRT-----RLKWYTATALKSTKSLAR          | LRGITN-I                                | 299   |     |
| 112 | -----TVQNKDATRT-----RIKWYCGLALKSTRSIAAIRGV      | VTN-I                                   | 302   |     |
| 113 | -----TVQNKDATRT-----RIKWYCGLALKSTRSIAAIRGV      | VTN-I                                   | 300   |     |
| 114 | -----TVQNKDATRT-----RIKWYCGLALKSTRSIAAIRGV      | ---                                     | 297   |     |
| 115 | -----TVQNKDATRT-----RLKWYCGLALKATKSLAAIRGV      | VTN-V                                   | 301   |     |
| 116 | -----TVQNKDATRT-----RIKWYCGLALKSTKSLAALKGV      | PN-I                                    | 297   |     |
| 117 | -----TVQNKDATRI-----RLKWYVGLVLKSTKSLARLKGVTN-I  | 300                                     |       |     |
| 118 | -----TVQNKDATRI-----RLKWYVGLVLKSTKSLARLKGVTN-I  | 300                                     |       |     |
| 119 | -----TVQNKDATRT-----RIKWYCGLALKSTKSLAALKGV      | PN-I                                    | 297   |     |
| 120 | -----TVQNKDAIRT-----RLKWYCGLALKSTKSLARLAGV      | VTN-V                                   | 301   |     |
| 121 | -----TVQNKDATRT-----RIKWYCGLALKSTRSIAAIRG       | ----                                    | 296   |     |
| 122 | -----TVQNKDATRT-----RIKWYCGLALKSTRSIAAIRGV      | VTN-I                                   | 300   |     |
| 123 | -----TVQNKDATRI-----RLKWYCGLALKSTKSIAR          | LKGVTN-I                                | 300   |     |
| 124 | -----TVQNKDATRT-----RIKWYCGLALKSTRSIAAIRGV      | VTN-I                                   | 300   |     |
| 125 | -----TVQNKDATRT-----RIKWYCGLALKSTRSIAAIRGV      | VTN-I                                   | 300   |     |
| 126 | -----TVQNKDATRT-----RIKWYCGLALKSTRSIAAIR        | ----                                    | 295   |     |
| 127 | -----KLEGKDAQRW-----RLKWYCGTALKRTTSVAR          | LKGVTN-I                                | 300   |     |
| 128 | -----KLEGKDAQRW-----RLKWYCGTALKRTTSVAR          | LKGVTN-I                                | 300   |     |
| 129 | -----TVQNKDADRI-----RVKWCAGTALKSTSTRSLAR        | LRGV                                    | VTN-I | 300 |
| 130 | -----TVQNKDADRI-----RVKWCAGTALKSTSTRSLAR        | LRGV                                    | VTN-I | 300 |
| 131 | -----TVQNKDADRI-----RVKWCAGTALKSTSTRSLAR        | LRGV                                    | VTN-I | 300 |
| 132 | -----TVQNKDATRT-----RIKWYCGLALKSTRSI            | -----                                   | 291   |     |
| 133 | -----VHQTKDERIW-----RVKWCGLALFSQLGVASADGIRD--   | 305                                     |       |     |
| 134 | -----TVQNKDADRI-----RVKWCAGTALKSTSTRSLAR        | LRGV                                    | VTN-I | 300 |
| 135 | -----TVQNKDATRT-----RIKWYCGLALKSTR-----         | 289                                     |       |     |
| 136 | -----TVQNKDAIRT-----RLKWYCGLALKSTKSLAALT        | NV                                      | PN-V  | 296 |
| 137 | -----TVQNKDVERY-----RMKWYCGTALKSTSTRSLAR        | LKGITN-I                                | 300   |     |
| 138 | -----TVQNKDATRI-----RLKWYTGALALKSTRSIAR         | LKGVTN-I                                | 303   |     |
| 139 | -----TIQNKDAVRY-----RVKWCAGTALKATHSVAR          | LAGITN-I                                | 300   |     |



|     |            |                           |     |
|-----|------------|---------------------------|-----|
| 140 | TVQNKDAVRT | RVKWCYGLANKHDYAIARIDNVKF  | 296 |
| 141 | TVQNKDAWRY | RLKWYVGLALKSTRSMARLKGITN  | 302 |
| 142 | TLEDKDATRY | RLKWYAGLVLKATHGVARLKGITN  | 300 |
| 143 | TVQNKDAVRT | RVKWCYGLANKHDYAIARIDNVKF  | 296 |
| 144 | THHTKDARKW | RVKWCYAGTALKATHSVARLKGITN | 300 |
| 145 | TVQNKDAERW | RVKWCYVGSALKATHSVARLRAISN | 300 |
| 146 | TVQNKDVERY | RMKWYVGTALKSTKSLARLKGITN  | 300 |
| 147 | TVQNKDATRT | RVKWCYCSLANKHDKAIAALTNVKI | 293 |
| 148 | TVQNKDATRT | RVKWCYCSLANKHDKAIAALTNVKI | 293 |
| 149 | TVQNKDATRT | RVKWCYCSLANKHDKAIAALTNVKI | 293 |
| 150 | TVQNKDATRT | RVKWCYCSLANKHDKAIAALTNVKI | 293 |
| 151 | TVQNKDAVRT | RVKWCYCSLANKHDKAIAALNNVKI | 306 |
| 152 | TVQNKDATRT | RVKWCYCSLANKHDKAIAALTNVKI | 293 |
| 153 | THHTKDARKW | RVKWCYAGTALKATHSVARLKGITN | 300 |
| 154 | TVQNKDAVRT | RVKWCYCSLANKHDKAIAALTNVKI | 293 |
| 155 | TVQNKDAVRT | RVKWCYCSLANKHDKAIAALNNVKI | 306 |
| 156 | TVQNKDATRT | RVKWCYCSLANKHDKAIAALTNVKI | 293 |
| 157 | TVQNKDATRT | RVKWCYCSLANKHDKAIAALTNVKI | 293 |
| 158 | TVQNKDAVRT | RVKWCYCSLANKHDKAIAALNNVKI | 306 |
| 159 | TVQNKDAVRT | RVKWCYCSLANKHDKAIAALNNVKI | 306 |
| 160 | TVQNKDAVRT | RVKWCYCSLANKHDKAIAALNNVKI | 306 |
| 161 | TVQNKDATRI | RLKWYVGLVLKSTK            | 289 |
| 162 | TVQTkdSSRT | RLKWYCGLALKSTKSMARLKGITN  | 307 |
| 163 | TVQNKDAVRT | RVKWCYCSLANKHDKAIAALNNVKI | 306 |
| 164 | TVQNKDATRT | RVKWCYCSLANKHDKAIAALTNVKI | 293 |
| 165 | TVQNKDATRT | RVKWCYCSLANKHDKAIAALTNVKI | 293 |
| 166 | TVQNKDATRT | RVKWCYCSLANKHDKAIAALTNVKI | 293 |
| 167 | TVQNKDATRT | RVKWCYCSLANKHDKAIAALTNVKI | 293 |
| 168 | TVQNKDATRT | RVKWCYCSLANKHDKAIAALTNVKI | 293 |
| 169 | TVQNKDATRT | RVKWCYCSLANKHDKAIAALTNVKI | 293 |
| 170 | TVQNKDAVRT | RVKWCYCSLANKHDKAIAALTNVKI | 291 |
| 171 | TVQNKDATRT | RVKWCYCSLANKHDKAIAALTNVKI | 293 |
| 172 | TVQNKDAVRT | RVKWCYCSLANKHDKAIAALNNVKI | 306 |
| 173 | TVQNKDAVRT | RVKWCYCSLANKHDKAIAALTNVKI | 291 |
| 174 | TVQNKDAVRT | RVKWCYCSLANKHDKAIAALTNVKI | 291 |
| 175 | TVQNKDAVRT | RVKWCYCSLANKHDKAIAALTNVKI | 291 |
| 176 | TVQNKDATRT | RVKWCYCSLANKHDKAIAALTNVKI | 293 |
| 177 | TVQNKDAVRT | RVKWCYCSLANKHDKAIAALNNVKI | 306 |
| 178 | TVQNKDAVRT | RVKWCYCSLANKHDKAIAALNNV   | 304 |
| 179 | TVQNKDATRT | RVKWCYCSLANKHDKAIAALTNVKI | 291 |
| 180 | TVQNKDATRT | RVKWCYCSLANKHDKAIAALTNVKI | 293 |
| 181 | TVQNKDAVRT | RVKWCYCSLANKHDKAIAALTNVKI | 291 |
| 182 | TVQNKDAVRT | RVKWCYCSLANKHDKAIAALTNVKI | 291 |
| 183 | TVQNKDAVRT | RVKWCYCSLANKHDKAIAALTNVKI | 291 |
| 184 | TVQNKDAVRT | RVKWCYCSLANKHDKAIAALTNVKI | 292 |
| 185 | TVQNKDAVRT | RVKWCYCSLANKHDKAIAALNNVKI | 306 |
| 186 | TVQNKDAVRT | RVKWCYCSLANKHDKAIAALTNVKI | 291 |
| 187 | TVQNKDAVRT | RVKWCYCSLANKHDKAIAALTNVKI | 291 |
| 188 | TVQNKDAVRT | RVKWCYCSLANKHDKAIAALTNVKI | 291 |
| 189 | TVQNKDAVRT | RVKWCYCSLANKHDKAIAALTNVKI | 291 |
| 190 | PMETKDARRH | RIKWYCGLALFRKAALARLKGIRP  | 296 |
| 191 | TVQNKDAVRT | RVKWCYCSLANKHDKAIAALNNVKI | 306 |
| 192 | TSHVKDADLH | RLKWYCGTALKATHALARLKGVTN  | 299 |
| 193 | TVQNKDAVRT | RVKWCYCSLANKHDKAIAALTNVKI | 291 |
| 194 | TVQNKDAVRT | RVKWCYCSLANKHDKAIAALTNVKI | 291 |
| 195 | TVQNKDAVRT | RVKWCYCSLANKHDKAIAALTNVKI | 291 |
| 196 | TVQNKDAVRT | RVKWCYCSLANKHDKAIAALTNVKI | 291 |
| 197 | TVQNKDAVRT | RVKWCYCSLANKHDKAIAALTNVKI | 291 |
| 198 | TVQNKDAVRT | RVKWCYCSLANKHDKAIAALTNVKI | 291 |
| 199 | TVQNKDAVRT | RVKWCYCSLANKHDKAIAALTNVKI | 291 |
| 200 | TVQNKDAVRT | RVKWCYCSLANKHDKAIAALTNVKI | 291 |
| 201 | TVQNKDAVRT | RVKWCYCSLANKHDKAIAALTNVKI | 291 |
| 202 | THATKDAHKW | RLKWYAGTALKATHSVARLKGILN  | 299 |
| 203 | TVQNKDAVRT | RVKWCYCSLANKHDKAIAALTNVKI | 291 |
| 204 | TVQNKDATRI | RLKWYAGLALKSTKSLARLKGVTN  | 302 |
| 205 | TVQNKDAVRT | RVKWCYCSLANKHDKAIAALTNVKI | 291 |
| 206 | TVQNKDAVRT | RVKWCYCSLANKHDKAIAALTNVKI | 291 |

|     |       |            |      |                          |        |     |
|-----|-------|------------|------|--------------------------|--------|-----|
| 207 | ----- | TVQNKDAVRT | ---- | RVKWYCSLANKHDKAIAALTNVKI | --     | 291 |
| 208 | ----- | TVQNKDAVRT | ---- | RVKWYCSLANKHDKAIAALTNVKI | --     | 291 |
| 209 | ----- | TVQNKDAVRT | ---- | RVKWYCSLANKHDKAIAALTNVKI | --     | 291 |
| 210 | ----- | TVQNKDAVRT | ---- | RVKWYCSLANKHDKAIAALTNVKI | --     | 291 |
| 211 | ----- | TVQNKDAVRT | ---- | RVKWYCSLANKHDKAIAALTNVKI | --     | 291 |
| 212 | ----- | TVQNKDAVRT | ---- | RVKWYCSLANKHDKAIAALTNVKI | --     | 291 |
| 213 | ----- | TVQNKDAVRT | ---- | RVKWYCSLANKHDKAIAALTNVKV | --     | 291 |
| 214 | ----- | TVQNKDAVRT | ---- | RVKWYCSLANKHDKAIAALNNVKI | --     | 306 |
| 215 | ----- | TVQNKDAVRT | ---- | RVKWYCSLANKHDKAIAALTNVKI | --     | 291 |
| 216 | ----- | TVQNKDAVRT | ---- | RVKWYCSLANKHDKAIAALTNVKI | --     | 291 |
| 217 | ----- | TVQNKDAVRT | ---- | RVKWYCSLANKHDKAIAALTNVKI | --     | 291 |
| 218 | ----- | TVQNKDAVRT | ---- | RVKWYCSLANKHDKAIAALTNVKI | --     | 291 |
| 219 | ----- | TVQNKDAVRT | ---- | RVKWYCSLANKHDKAIAALTNVKI | --     | 291 |
| 220 | ----- | TVQNKDAVRT | ---- | RVKWYCSLANKHDKAIAALTNVKI | --     | 291 |
| 221 | ----- | TVQNKDAVRT | ---- | RVKWYCSLANKHDKAIAALTNVKI | --     | 291 |
| 222 | ----- | TVQNKDAVRT | ---- | RVKWYCSLANKHDKAIAALTNVKI | --     | 291 |
| 223 | ----- | TVQNKDAVRT | ---- | RVKWYCSLANKHDKAIAALTNVKI | --     | 291 |
| 224 | ----- | TVQNKDAVRT | ---- | RVKWYCSLANKHDKAIAALTNVKI | --     | 291 |
| 225 | ----- | TVQNKDAVRT | ---- | RVKWYCSLANKHDKAIAALTNVKI | --     | 291 |
| 226 | ----- | TVQNKDAVRT | ---- | RVKWYCSLANKHDKAIAALTNVK  | --     | 290 |
| 227 | ----- | TVQNKDAVRT | ---- | RVKWYCSLANKHDKAIAALTNVKI | --     | 291 |
| 228 | ----- | TVQNKDAIRT | ---- | RLKWYCGLALKSTKSLACLKNVQI | -G     | 293 |
| 229 | ----- | TVQNKDAVRT | ---- | RVKWYCSLANKHDKAIAALTNVKI | --     | 291 |
| 230 | ----- | TVQNKDAIRT | ---- | RLKWYCGLALKSTKSLACLKNVQI | -G     | 293 |
| 231 | ----- | TVQNKDAVRT | ---- | RVKWYCSLANKHDKAIAALTNVKI | --     | 291 |
| 232 | ----- | TVQNKDAVRT | ---- | RVKWYCSLANKHDKAIAALNNVKI | --     | 306 |
| 233 | ----- | TVQNKDAVRT | ---- | RVKWYCSLANKHDKAIAALTNVKI | --     | 291 |
| 234 | ----- | TVQNKDAVRT | ---- | RVKWYCSLANKHDKAIAALTNVKI | --     | 291 |
| 235 | ----- | TVQNKDAVRT | ---- | RVKWYCSLANKHDKAIAALTNVKI | --     | 291 |
| 236 | ----- | TVQNKDAVRT | ---- | RVKWYCSLANKHDKAIAALTNVKI | --     | 291 |
| 237 | ----- | TVQNKDAVRT | ---- | RVKWYCSLANKHDKAIAALT     | LTNVKI | 291 |
| 238 | ----- | TVQNKDAVRT | ---- | RVKWYCSLANKHDKAIAALTNVKI | --     | 291 |
| 239 | ----- | ALETKNARRW | ---- | RVRWYVGLALFSTVAVAQLQGITA | -N     | 295 |
| 240 | ----- | TVQNKDAVRT | ---- | RVKWYCSLANKHDKAIAALNN    | ----   | 303 |
| 241 | ----- | TVQNKDATRT | ---- | RVKWYCSLANKHDKAIAALTNVKI | --     | 291 |
| 242 | ----- | TVQNKDAVRT | ---- | RVKWYCSLANKHDKAIAALTNVKI | --     | 291 |
| 243 | ----- | TVQNKDAVRT | ---- | RVKWYCSLANKHDKAIAALTNVKI | --     | 291 |
| 244 | ----- | TVQNKDAVRT | ---- | RVKWYCSLANKHDKAIAALTNVKI | --     | 291 |
| 245 | ----- | TVQNKDAVRT | ---- | RVKWYCSLANKHDKAIAALTNVKI | --     | 291 |
| 246 | ----- | TVQNKDAVRT | ---- | RVKWYCSLANKHDKAIAALTNVKI | --     | 291 |
| 247 | ----- | TVQNKDAVRT | ---- | RVKWYCSLANKHDKAIAALTNVKI | --     | 291 |
| 248 | ----- | TVQNKDAVRT | ---- | RVKWYCSLANKHDKAIAALTNV   | ----   | 289 |
| 249 | ----- | TVQNKDAVRT | ---- | RVKWYCSLANKHDKAIAALTNVKI | --     | 291 |
| 250 | ----- | TVQNKDAVRT | ---- | RVKWYCSLANKHDKAIAALTNVKI | --     | 291 |
| 251 | ----- | TVQNKDAVRT | ---- | RVKWYCSLANKHDKAIAALTNVKI | --     | 291 |
| 252 | ----- | TVQNKDAVRT | ---- | RVKWYCSLANKHDKAIAALTNVKI | --     | 291 |
| 253 | ----- | TVQNKDAVRT | ---- | RVKWYCSLANKHDKAIAALTNVKI | --     | 291 |
| 254 | ----- | TVQNKDAVRT | ---- | RVKWYCSLANKHDKAIAALTNVK  | --     | 290 |
| 255 | ----- | TVQNKDAVRT | ---- | RVKWYCSLANKHDKAIAALTNVKI | --     | 291 |
| 256 | ----- | TVQNKDATRT | ---- | RVKWYCSLANKHDKAIAALTNVKI | --     | 291 |
| 257 | ----- | TVQNKDATRT | ---- | RVKWYCSLANKHDKAIAALTNVKI | --     | 291 |
| 258 | ----- | TVQNKDAVRT | ---- | RVKWYCSLANKHDKAIAALTNVKI | --     | 291 |
| 259 | ----- | TVQNKDAVRT | ---- | RVKWYCSLANKHDKAIAALTNVKI | --     | 291 |
| 260 | ----- | TVQNKDAVRT | ---- | RVKWYCSLANKHDKAIAALTNVKI | --     | 291 |
| 261 | ----- | TVQNKDAVRT | ---- | RVKWYCSLANKHDKAIAALTNVKI | --     | 292 |
| 262 | ----- | TVQNKDAVRT | ---- | RVKWYCSLANKHDKAIAALTNVKI | --     | 291 |
| 263 | ----- | TVQNKDAVRT | ---- | RVKWYCSLANKHDKAIAALKNVKI | --     | 293 |
| 264 | ----- | TVQNKDAVRT | ---- | RVKWYCSLANKHDKAIAALTNVKI | --     | 293 |
| 265 | ----- | TVQNKDAVRT | ---- | RVKWYCSLANKHDKAIAALTNVKI | --     | 292 |
| 266 | ----- | TVQNKDAVRT | ---- | RVKWYCSLANKHDKAIAALTNVK  | --     | 290 |
| 267 | ----- | TVQNKDAVRT | ---- | RVKWYCSLANKHDKAIAALTNVKI | --     | 292 |
| 268 | ----- | TVQNKDAVRT | ---- | RVKWYCSLANKHDKAIAALTNVKI | --     | 292 |
| 269 | ----- | TVQNKDATRT | ---- | RVKWYCSLANKHDKAIAALTNVKI | --     | 291 |
| 270 | ----- | TVQNKDAIRT | ---- | RLKWYCGLALKSTKSLACLKNVQI | -G     | 293 |
| 271 | ----- | TVQNKDAVRT | ---- | RVKWYCSLANKHDKAIAALTNVKI | --     | 291 |
| 272 | ----- | TVQNKDAVRT | ---- | RVKWYCSLANKHDKAIAALTNVKI | --     | 291 |
| 273 | ----- | TVQNKDAVRT | ---- | RVKWYCSLANKHDKAIAALTNVKI | --     | 292 |



|     |            |                           |     |
|-----|------------|---------------------------|-----|
| 341 | TVQNKDATRT | RVKWYCSLANKHDKAIAALTNVKI  | 291 |
| 342 | TVQNKDAVRT | RVKWYCSLANKHDKAIAAL       | 301 |
| 343 | TVQNKDATRT | RVKWYCSLANKHDKAIAALTNVKI  | 291 |
| 344 | TVQNKDATRT | RVKWYCSLANKHDKAIAALTNVKI  | 291 |
| 345 | TVQNKDAVRT | RVKWYCSLANKHDKAIAALTNVK   | 291 |
| 346 | TVQNKDAVRT | RVKWYCSLANKHDKAIAALTNVKI  | 291 |
| 347 | TVQNKDAVRT | RVKWYCSLANKHDKAIAALTN     | 288 |
| 348 | TVQNKDAVRT | RVKWYCSLANKHDKAIAALTNVKI  | 293 |
| 349 | TVQNKDATRT | RVKWYCSLANKHDKAIAALTNVKI  | 291 |
| 350 | TVQNKDATRT | RVKWYCSLANKHDKAIAALTNVK   | 290 |
| 351 | TVQNKDATRT | RIKWYCSGLALKSTRSIAAIRGVTN | 281 |
| 352 | TVQNKDATRT | RVKWYCSLANKHDKAIAALTNVKI  | 291 |
| 353 | TSETKDEIT  | RVKWYCSGLALFSEKGLAALTGITN | 306 |
| 354 | TVQNKDAVRT | RVKWYCSLANKHDKAIAALTNV    | 287 |
| 355 | TVQNKDAVRT | RVKWYCSLANKHDKAIAALTNVKI  | 293 |
| 356 | TVQNKDATRT | RVKWYCSLANKHDKAIAALTNVKI  | 291 |
| 357 | TVQNKDAVRT | RVKWYCSLANKHDKAIAALTNV    | 290 |
| 358 | TVQNKDATRT | RVKWYCSLANKHDKAIAALTNVKI  | 291 |
| 359 | TVQNKDAVRT | RVKWYCSLANKHDKAIAALTNVKI  | 292 |
| 360 | TVQNKDATRT | RVKWYCSLANKHDKAIAALTNVKI  | 291 |
| 361 | TVQNKDATRT | RVKWYCSLANKHDKAIAALTNVKI  | 293 |
| 362 | TVQNKDAVRT | RVKWYCSLANKHDKAIAALTNVKI  | 292 |
| 363 | TVQNKDATRT | RVKWYCSLANKHDKAIAALTNVKT  | 291 |
| 364 | TVQNKDATRT | RVKWYCSLANKHDKAIAALTNVKI  | 291 |
| 365 | TVQNKDATRT | RVKWYCSLANKHDKAIAALTNVKI  | 291 |
| 366 | TVQNKDATRT | RVKWYCSLANKHDKAIAALTNVKI  | 291 |
| 367 | TVQNKDAVRT | RVKWYCSLANKHDKAIAALTNVKI  | 293 |
| 368 | TVQNKDAVRT | RVKWYCSLANKHDKAIAALTNVKI  | 293 |
| 369 | TVQNKDATRT | RVKWYCSLANKHDKAIAALTNVKI  | 291 |
| 370 | TVQNKDATRT | RVKWYCSLANKHDKAIAALTNVKI  | 291 |
| 371 | TVQNKDATRT | RVKWYCSLANKHDKAIAALTNVKI  | 291 |
| 372 | TVQNKDATRT | RVKWYCSLANKHDKAIAALTNVKI  | 291 |
| 373 | TVQNKDATRT | RVKWYCSLANKHDKAIAALTNVKI  | 291 |
| 374 | TVQNKDAVRT | RVKWYCSLANKHDKAIAALTNVKI  | 291 |
| 375 | TVQNKDATRT | RVKWYCSLANKHDKAIAALTNVKI  | 291 |
| 376 | TVQNKDAVRT | RVKWYCSLANKHDKAIAALTNVKI  | 291 |
| 377 | ALETKNARRW | RVRWYCSGLALFSTVAVARLQGIAA | 295 |
| 378 | TVQNKDATRT | RVKWYCSLANKHDKAIAALTNVKI  | 291 |
| 379 | TVQNKDATRT | RVKWYCSLANKHDKAIAALTNVKI  | 291 |
| 380 | TVQNKDAVRT | RVKWYCSLANKHDKAIAALTNVKI  | 293 |
| 381 | TVQNKDAVRT | RVKWYCSLANKHDKAIAALTNVKI  | 293 |
| 382 | EAEAKDEHIW | RVKWYCSGLALFSELGLSAEIGILN | 305 |
| 383 | TVQNKDAVRT | RVKWYCSLANKHDKAIAALTNVKI  | 293 |
| 384 | TVQNKDAVRT | RVKWYCSLANKHDKAIAALTNVKI  | 293 |
| 385 | TVQNKDATRT | RVKWYCSLANKHDKAIAALTNVKI  | 291 |
| 386 | TVQNKDAVRT | RVKWYCSLANKHDKAIAALTNVKI  | 291 |
| 387 | TVQNKDATRT | RLKWYCSNLALKSTKSLARLYGVSN | 306 |
| 388 | TVQNKDAVRT | RVKWYCSLANKHDKAIAALTNVKI  | 293 |
| 389 | TVQNKDAVRT | RVKWYCSLANKHDKAIAALTNVKI  | 292 |
| 390 | VHQSKDERIW | RVKWYCSGLALFSQLGIAAADGIRN | 305 |
| 391 | TVQNKDAVRT | RVKWYCSLANKHDKAIAALTNVKI  | 293 |
| 392 | TVQNKDATRT | RVKWYCSLANKHDKAIAALTNVKI  | 291 |
| 393 | TVQNKDATRT | RVKWYCSLANKHDKAIAALTNVKI  | 291 |
| 394 | TVQNKDAVRT | RVKWYCSLANKHDKAIAALTNVKI  | 293 |
| 395 | TVQNKDAVRT | RVKWYCSLANKHDKAIAALTNVKI  | 293 |
| 396 | TVQNKDAVRT | RVKWYCSLANKHDKAIAALTNVKI  | 305 |
| 397 | EKEDADESIT | RISWYCSGLALFSEKGLAVLKGVIP | 310 |
| 398 | TVQNKDAVRT | RVKWYCSLANKHDKAIAALTN     | 287 |
| 399 | TVQNKDAVRT | RVKWYCSLANKHDKAIAALTNVKI  | 293 |
| 400 | TVQNKDAVRT | RVKWYCSLANKHDKAIAALTNVKI  | 293 |
| 401 | TVQNKDAVRT | RVKWYCSLANKHDKAIAALTNVKI  | 293 |
| 402 | TVQNKDAVRT | RVKWYCSLANKHDKAIAALTNVKI  | 293 |
| 403 | TVQNKDAVRT | RVKWYCSLANKHDKAIAALTN     | 289 |
| 404 | TVQNKDAVRT | RVKWYCSLANKHDKAIAALTNVKI  | 292 |
| 405 | TVQNKDAVRT | RVKWYCSLANKHDKAIAAL       | 286 |
| 406 | TVQNKDAVRT | RVKWYCSLANKHDKAIAALTNVKI  | 293 |
| 407 | TVQNKDAVRT | RVKWYCSLANKHDKAIAALTNV    | 290 |

|     |             |                            |     |
|-----|-------------|----------------------------|-----|
| 408 | TVQNKDATRT  | RVKWYCSLANKHDKAIAALTNVKI   | 291 |
| 409 | TVQNKDAVRT  | RVKWYCSLANKHDKAIAALTNVKI   | 293 |
| 410 | TVQNKDAVRT  | RVKWYCSLANKHDKAIAALTNVKI   | 293 |
| 411 | TVQNKDAVRT  | RVKWYCSLANKHDKAIAALTNVKI   | 293 |
| 412 | TVQNKDAVRT  | RVKWYCSLANKHDKAIAALTNVKI   | 293 |
| 413 | TVQNKDAVRT  | RVKWYCSLANKHDKAIAALT       | 287 |
| 414 | TVQNKDAVRT  | RVKWYCSLANKHDKAIAALTNVKI   | 293 |
| 415 | TVQNKDAVRT  | RVKWYCSLANKHDKAIAALTNVKI   | 293 |
| 416 | TVQNKDAVRT  | RVKWYCSLANKHDKAIAALTNVKI   | 293 |
| 417 | TVQNKDAVRT  | RVKWYCSLANKHDKAIAALANVKI   | 305 |
| 418 | TVQNKDATRT  | RVKWYCSLANKHDKAIAALTNVKI   | 291 |
| 419 | LLEKRDAARRW | RLRWYCGAALKATHSLARLKGVTN-V | 300 |
| 420 | TVQNKDAVRT  | RVKWYCSLANKHDKAIAALTNVKI   | 293 |
| 421 | TVQNKDAVRT  | RVKWYCSLANKHDKAIAALT       | 287 |
| 422 | TVQNKDAVRT  | RVKWYCSLANKHD              | 295 |
| 423 | TVQNKDAVRT  | RVKWYCSLANKHDKAIAALANVKI   | 305 |
| 424 | TVQNKDAVRT  | RVKWYCSLANKHDKAIAALTNVKI   | 293 |
| 425 | TVQNKDAVRT  | RVKWYCSLANK                | 293 |
| 426 | TVQNKDAVRT  | RVKWYCSLANKHD              | 295 |
| 427 | TVQNKDAVRT  | RVKWYCSLA                  | 291 |
| 428 | TVQNKDAVRT  | RVKWYCSLANKHDKAIAALTNV     | 291 |
| 429 | TVQNKDAVRT  | RVKWYCSLANKHDKAIAAL        | 286 |
| 430 | TVQNKDAVRT  | RVKWYCSLANKHDKAI           | 298 |
| 431 | TVQNKDAVRT  | RVKWYCSLANKHDKAIAALTNVKI   | 293 |
| 432 | IHQSKDEHIT  | RVKWYCGLALFSLKGLAADGITN    | 305 |
| 433 | TVQNKDAVRT  | RVKWYCSLANKHDKAIAAL        | 286 |
| 434 | TVQNKDAVRT  | RVKWYCSLANKHDKAIAALTNVKI   | 292 |
| 435 | TVQNKDAVRT  | RVKWYCSLANKHDKAIAALTNVKI   | 292 |
| 436 | TVQNKDAVRT  | RVKWYCSLANKHDKAIAALTNVKI   | 293 |
| 437 | TVQNKDATRT  | RVKWYVSLANKHDKAIASLNNVKI   | 291 |
| 438 | TVQNKDAVRT  | RVKWYCSLANKHDKAIAALTNVKI   | 293 |
| 439 | TVQNKDAIRT  | RLKWYCGLALKSTKSLACLKNVQI-G | 293 |
| 440 | TVQNKDAVRT  | RVKWYCSLANKHDKAIAALT       | 287 |
| 441 | ALETKNARRW  | RVRWYCGLALFSTVAVARLQGIAA-N | 295 |
| 442 | TVQNKDSTRT  | RVKWYCSLANKHDKAISALTGVAL   | 294 |
| 443 | TVQNKDATRT  | RVKWYCSLANKHDKAIAALTNVKI   | 291 |
| 444 | ESESKDESIT  | RVKFYCGLACYSDLALAVVKGISN   | 305 |
| 445 | ISETKDETIW  | RVKWYCGLALFSELGLAAAEGITN   | 305 |
| 446 | TVQNKDAVRT  | RVKWYCSLANKHDKAIA          | 284 |
| 447 | TVQNKDAVRT  | RVKWYCSLANKHDKAIAA         | 285 |
| 448 | DLETKDASRW  | RVKWYVSLAVFSELGVARLQGITA-N | 293 |
| 449 | TVQNKDAVRT  | RVKWYCSLANKHDKAIA          | 284 |
| 450 | TVQNKDAVRT  | RVKWYCSLANKHDKAIAAL        | 286 |
| 451 | ALETKNARRW  | RVRWYVGLALFSTVAVARLQGITA-N | 295 |
| 452 | ELETKDASRH  | RIKWYAGLALFSELGVARLRGIEG-A | 295 |
| 453 | TVQNKDAVRT  | RVKWYCSLANKHDKAIAALTKVKI   | 293 |
| 454 | EKEDADESIT  | RISWYCGLALFSEKGLAVLKGVIP-G | 310 |
| 455 | TVQNKDADRI  | RVKWYCGTALKSTRSLARLQGITN-I | 300 |
| 456 | TVQNKDAVRT  | RVKWYCSLANKHDKAIAALT       | 288 |
| 457 | TVQNKDAVRT  | RVKWYCSLANKHDKA            | 282 |
| 458 | TVQNKDAVRT  | RVKWYCSLANKHDKAIAALTN      | 290 |
| 459 | TVQNKDATRT  | RLKWYVGAALKSTKSVARLEAVTN-V | 300 |
| 460 | TVQNKDAVRT  | RVKWYCSLANKHDKAI           | 283 |
| 461 | EKEDADESIT  | RISWYCGLALFSEKGLAVLKGVTP-G | 310 |
| 462 | TVQNKDAVRT  | RVKWYCSLANK                | 278 |
| 463 | VNQTVNMTKDI | WVSMPAGLALGSQAALSLLTNFEH-V | 227 |
| 464 | TVQNKDAVRT  | RVKWYCSL                   | 290 |
| 465 | TVQNKDAVRT  | RVKWYCSLANKHDKAIAA         | 285 |
| 466 | TVQNKDAVRT  | RVKWYCSLA                  | 276 |
| 467 | TVQNKDAVRT  | RVKWYCSLANKHD              | 280 |
| 468 | TVQNKDAVRT  | RVKWYCSLANKHDK             | 281 |
| 469 | TVQNKDATRT  | RVKWYCGLANKHEKAIAALTDVQL   | 294 |
| 470 | TVQNKDAVRT  | RVKWYCSLANKHDKA            | 282 |
| 471 | ASETKDNYIT  | RVKWYCGLALFSEKGLAALPGVTN   | 306 |
| 472 | TVQNKDATRI  | RLKWYTSLALKSTRSIAALQGVTN-I | 310 |
| 473 | ASETKDNYIT  | RVKWYCGLALFSEKGLAALPGVTN   | 306 |
| 474 | TVQNKDAVRT  | RVKWYCSLA                  | 276 |



|     |                |            |       |                          |                |     |
|-----|----------------|------------|-------|--------------------------|----------------|-----|
| 475 | -- -- -- -- -- | TVQNKDAVRT | -- -- | RVKWYCSLANKHDKA          | -- -- -- -- -- | 282 |
| 476 | -- -- -- -- -- | EKEDADESIT | -- -- | RISWYCGLALFSEKGLAVLKGV   | TP-G           | 310 |
| 477 | -- -- -- -- -- | ESETKDETIT | -- -- | RVKMYCGLANFSQLGLYAMP     | GITN--         | 305 |
| 478 | -- -- -- -- -- | ESETKDESIT | -- -- | RVKFYCGLAVYSDLALAVAQGV   | KN--           | 305 |
| 479 | -- -- -- -- -- | EKEDADESIT | -- -- | RITWYCGLALFSEKGLAVLEGV   | TP--           | 309 |
| 480 | -- -- -- -- -- | PAEDKDNYIT | -- -- | RVKWYCSLALFSEKGLAMADG    | ITN--          | 306 |
| 481 | -- -- -- -- -- | TVQNKDAVRT | -- -- | RVKWYCSLANK              | -- -- -- -- -- | 278 |
| 482 | -- -- -- -- -- | TVQNKDAVRT | -- -- | RVKWYCSLA                | -- -- -- -- -- | 276 |
| 483 | -- -- -- -- -- | TVQNKDSTRT | -- -- | RVKWYCSLANKHDKALAALTGV   | VAL--          | 294 |
| 484 | -- -- -- -- -- | TVQNKDAVRT | -- -- | RVKWYCSLAN               | -- -- -- -- -- | 277 |
| 485 | -- -- -- -- -- | ELETKDASRH | -- -- | RIKWYAGLALFSELGVARLRGIEG | -A             | 295 |
| 486 | -- -- -- -- -- | TVQNKDSTRT | -- -- | RVKWYCSLANKHDKAISALTGV   | VAL--          | 294 |
| 487 | -- -- -- -- -- | TVQNKDAVRT | -- -- | RVKWYCSLANKHDKAIAAL      | -- -- -- --    | 288 |
| 488 | -- -- -- -- -- | TVQNKDATRT | -- -- | RVKWYCSLANKHDKAIAALTGV   | VAL--          | 294 |
| 489 | -- -- -- -- -- | TVQNKDATRT | -- -- | RVKWYCSLANKHDKAISALTGV   | VAL--          | 294 |
| 490 | -- -- -- -- -- | EKEDADESIT | -- -- | RISWYCGLALFSEKGLAVLKGV   | TP-A           | 310 |
| 491 | -- -- -- -- -- | TVQNKDAVRT | -- -- | RVKWYCSL                 | -- -- -- -- -- | 275 |
| 492 | -- -- -- -- -- | ESETKDESIT | -- -- | RVKFYCGLAVYSDLALAVAKGV   | VTN--          | 305 |
| 493 | -- -- -- -- -- | TVQNKDAVRT | -- -- | RVKWYCSLANK              | -- -- -- -- -- | 279 |
| 494 | -- -- -- -- -- | ALETKDATRW | -- -- | RVKWYVGLALASDLGVARLQGITA | -N             | 295 |
| 495 | -- -- -- -- -- | TVQNKDAVRT | -- -- | RVKWYCSLA                | -- -- -- -- -- | 277 |
| 496 | -- -- -- -- -- | TVQNKDAVRT | -- -- | RVKWYCSLAN               | -- -- -- -- -- | 278 |
| 497 | -- -- -- -- -- | ESETKDNTIT | -- -- | RVKMYTGMA LFSELGLAAMTGV  | VTN--          | 306 |
| 498 | -- -- -- -- -- | TVQNKDAVRT | -- -- | RVKWYCSL                 | -- -- -- -- -- | 275 |
| 499 | -- -- -- -- -- | TVQNKDATRT | -- -- | RVKWYCSLANKHNKAIAALTGV   | VAL--          | 294 |
| 500 | -- -- -- -- -- | EKEDADESIT | -- -- | RISWYCGLALFSEKGLAVLKGV   | TP-A           | 310 |

|    |          |             |     |
|----|----------|-------------|-----|
| 1  |          | - - - - -   | 288 |
| 2  |          | - - - - -   | 288 |
| 3  |          | - - - - -   | 288 |
| 4  |          | - - - - -   | 288 |
| 5  |          | - - - - -   | 288 |
| 6  |          | - - - - -   | 288 |
| 7  |          | - - - - -   | 286 |
| 8  |          | - - - - -   | 286 |
| 9  |          | - - - - -   | 286 |
| 10 |          | - - - - -   | 286 |
| 11 |          | - - - - -   | 286 |
| 12 |          | - - - - -   | 286 |
| 13 |          | - - - - -   | 287 |
| 14 |          | - - - - -   | 287 |
| 15 | GDGY-    | -SSKRKG-    | 337 |
| 16 | CGK-     | - - - - -   | 330 |
| 17 | CGK-     | - - - - -   | 330 |
| 18 | CR-      | - - - - -   | 329 |
| 19 | SRIPL-   | -INFENHGA-  | 339 |
| 20 | G-       | - - - - -   | 329 |
| 21 | QRSPL-   | -IDFDIRGA-  | 339 |
| 22 | HRSP L-  | -IDFDIRGA-  | 339 |
| 23 | QRSPL-   | -IDFDIRGA-  | 340 |
| 24 | HRSP L-  | -IDFDIRGA-  | 339 |
| 25 | HRSP L-  | -IDFDIRRA-  | 339 |
| 26 | H RG PL- | -IDFDIQGA-  | 339 |
| 27 | CR-      | - - - - -   | 329 |
| 28 | HRSP L-  | -IDFDIRGA-  | 339 |
| 29 | ANLT-    | - - - - TT- | 348 |
| 30 | ANLT-    | - - - - TT- | 354 |
| 31 | ADLP-    | - - - - TT- | 329 |
| 32 | ADLP-    | - - - - TT- | 329 |
| 33 | ANLA-    | - - - - AT- | 344 |
| 34 | VDFA-    | - - - - -   | 336 |
| 35 | -        | - - - - -   | 332 |

|     |                                      |     |
|-----|--------------------------------------|-----|
| 36  | - - - - -                            | 209 |
| 37  | AAYT - - - - -                       | 332 |
| 38  | ANLP - - - - - VT - - - - -          | 338 |
| 39  | - - - - -                            | 300 |
| 40  | SNVA - - - - -                       | 324 |
| 41  | - - - - -                            | 286 |
| 42  | ADLP - - - - - TT - - - - -          | 346 |
| 43  | ADLP - - - - - TT - - - - -          | 345 |
| 44  | ADLP - - - - - TT - - - - -          | 346 |
| 45  | AHL - - - - -                        | 333 |
| 46  | GSCG - - - - - GG - - - - -          | 315 |
| 47  | GPCV - - - - - PDPA - - - - -        | 317 |
| 48  | ASCG - - - - - GG - - - - -          | 313 |
| 49  | ASCG - - - - - GGGG - - - - -        | 317 |
| 50  | ASCG - - - - - GGT - - - - -         | 314 |
| 51  | ADCG - - - - - GG - - - - -          | 318 |
| 52  | GECA - - - - - GIVP - - - - -        | 320 |
| 53  | - - - - -                            | 309 |
| 54  | - - - - -                            | 313 |
| 55  | - - - - -                            | 313 |
| 56  | - - - - -                            | 258 |
| 57  | EDCN - - - - - GAELAMEAGATSAKSKSKRSK | 339 |
| 58  | - - - - -                            | 317 |
| 59  | - - - - -                            | 309 |
| 60  | GECA - - - - - GGPPPA - - - - -      | 323 |
| 61  | - - - - -                            | 311 |
| 62  | ASCG - - - - - GGGG - - - - -        | 320 |
| 63  | GECT - - - - - GIVP - - - - -        | 320 |
| 64  | - - - - -                            | 309 |
| 65  | - - - - -                            | 313 |
| 66  | SDCS - - - - - VG - - - - -          | 317 |
| 67  | GPCP - - - - - TITPA - - - - -       | 326 |
| 68  | - - - - - QPL - - - - -              | 310 |
| 69  | - - - - - QPL - - - - -              | 326 |
| 70  | - - - - -                            | 323 |
| 71  | - - - - -                            | 374 |
| 72  | - - - - -                            | 369 |
| 73  | - - - - -                            | 323 |
| 74  | GGQ - - - - - DQSGTGKPTLV - - - - -  | 314 |
| 75  | - - - - -                            | 259 |
| 76  | ANLT - - - - - TT - - - - -          | 283 |
| 77  | - - - - -                            | 285 |
| 78  | - - - - -                            | 299 |
| 79  | - - - - -                            | 223 |
| 80  | - - - - -                            | 300 |
| 81  | - - - - -                            | 301 |
| 82  | - - - - -                            | 300 |
| 83  | - - - - -                            | 300 |
| 84  | - - - - -                            | 300 |
| 85  | - - - - -                            | 300 |
| 86  | - - - - -                            | 300 |
| 87  | - - - - -                            | 310 |
| 88  | - - - - -                            | 264 |
| 89  | - - - - -                            | 300 |
| 90  | - - - - -                            | 300 |
| 91  | ASCG - - - - - G - - - - -           | 277 |
| 92  | - - - - -                            | 310 |
| 93  | - - - - -                            | 310 |
| 94  | - - - - - ESGGPLA - - - - -          | 304 |
| 95  | - - - - -                            | 300 |
| 96  | - - - - -                            | 300 |
| 97  | - - - - -                            | 300 |
| 98  | - - - - -                            | 300 |
| 99  | - - - - -                            | 300 |
| 100 | - - - - -                            | 300 |
| 101 | - - - - -                            | 300 |
| 102 | - - - - - GA - - - - -               | 323 |

|     |     |     |
|-----|-----|-----|
| 103 | -   | 300 |
| 104 | -   | 300 |
| 105 | -   | 300 |
| 106 | -   | 298 |
| 107 | -   | 295 |
| 108 | -   | 298 |
| 109 | -   | 299 |
| 110 | -   | 300 |
| 111 | -   | 299 |
| 112 | -   | 302 |
| 113 | -   | 300 |
| 114 | -   | 297 |
| 115 | -   | 301 |
| 116 | -   | 297 |
| 117 | -   | 300 |
| 118 | -   | 300 |
| 119 | -   | 297 |
| 120 | -   | 301 |
| 121 | -   | 296 |
| 122 | -   | 300 |
| 123 | -   | 300 |
| 124 | -   | 300 |
| 125 | -   | 300 |
| 126 | -   | 295 |
| 127 | -   | 300 |
| 128 | -   | 300 |
| 129 | -   | 300 |
| 130 | -   | 300 |
| 131 | -   | 300 |
| 132 | -   | 291 |
| 133 | -   | 305 |
| 134 | -   | 300 |
| 135 | -   | 289 |
| 136 | -   | 296 |
| 137 | -   | 300 |
| 138 | -   | 303 |
| 139 | -   | 300 |
| 140 | -   | 296 |
| 141 | -   | 302 |
| 142 | -   | 300 |
| 143 | -   | 296 |
| 144 | -   | 300 |
| 145 | -   | 300 |
| 146 | -   | 300 |
| 147 | -   | 293 |
| 148 | -   | 293 |
| 149 | -   | 293 |
| 150 | -   | 293 |
| 151 | -   | 306 |
| 152 | -   | 293 |
| 153 | -   | 300 |
| 154 | -   | 293 |
| 155 | -   | 306 |
| 156 | -   | 293 |
| 157 | -   | 293 |
| 158 | -   | 306 |
| 159 | -   | 306 |
| 160 | -   | 306 |
| 161 | -   | 289 |
| 162 | A - | 308 |
| 163 | -   | 306 |
| 164 | -   | 293 |
| 165 | -   | 293 |
| 166 | -   | 293 |
| 167 | -   | 293 |
| 168 | -   | 293 |
| 169 | -   | 293 |

|     |       |     |
|-----|-------|-----|
| 170 | -     | 291 |
| 171 | -     | 293 |
| 172 | -     | 306 |
| 173 | -     | 291 |
| 174 | -     | 291 |
| 175 | -     | 291 |
| 176 | -     | 293 |
| 177 | -     | 306 |
| 178 | -     | 304 |
| 179 | -     | 291 |
| 180 | -     | 293 |
| 181 | -     | 291 |
| 182 | -     | 291 |
| 183 | -     | 291 |
| 184 | SV -  | 294 |
| 185 | -     | 306 |
| 186 | -     | 291 |
| 187 | -     | 291 |
| 188 | -     | 291 |
| 189 | -     | 291 |
| 190 | S -   | 297 |
| 191 | -     | 306 |
| 192 | -     | 299 |
| 193 | -     | 291 |
| 194 | -     | 291 |
| 195 | -     | 291 |
| 196 | -     | 291 |
| 197 | -     | 291 |
| 198 | -     | 291 |
| 199 | -     | 291 |
| 200 | -     | 291 |
| 201 | -     | 291 |
| 202 | -     | 299 |
| 203 | -     | 291 |
| 204 | -     | 302 |
| 205 | -     | 291 |
| 206 | -     | 291 |
| 207 | -     | 291 |
| 208 | -     | 291 |
| 209 | -     | 291 |
| 210 | -     | 291 |
| 211 | -     | 291 |
| 212 | -     | 291 |
| 213 | -     | 291 |
| 214 | -     | 306 |
| 215 | -     | 291 |
| 216 | -     | 291 |
| 217 | -     | 291 |
| 218 | -     | 291 |
| 219 | -     | 291 |
| 220 | -     | 291 |
| 221 | -     | 291 |
| 222 | -     | 291 |
| 223 | -     | 291 |
| 224 | -     | 291 |
| 225 | -     | 291 |
| 226 | -     | 290 |
| 227 | -     | 291 |
| 228 | ASA - | 296 |
| 229 | -     | 291 |
| 230 | AGA - | 296 |
| 231 | -     | 291 |
| 232 | -     | 306 |
| 233 | -     | 291 |
| 234 | -     | 291 |
| 235 | -     | 291 |
| 236 | -     | 291 |

|     |                                  |     |
|-----|----------------------------------|-----|
| 237 | - - - - -                        | 291 |
| 238 | - - - - -                        | 291 |
| 239 | - - - - -                        | 295 |
| 240 | - - - - -                        | 303 |
| 241 | - - - - -                        | 291 |
| 242 | - - - - -                        | 291 |
| 243 | - - - - -                        | 291 |
| 244 | - - - - -                        | 291 |
| 245 | - - - - -                        | 291 |
| 246 | - - - - -                        | 291 |
| 247 | - - - - -                        | 291 |
| 248 | - - - - -                        | 289 |
| 249 | - - - - -                        | 291 |
| 250 | - - - - -                        | 291 |
| 251 | - - - - -                        | 291 |
| 252 | - - - - -                        | 291 |
| 253 | - - - - -                        | 291 |
| 254 | - - - - -                        | 290 |
| 255 | - - - - -                        | 291 |
| 256 | - - - - -                        | 291 |
| 257 | - - - - -                        | 291 |
| 258 | - - - - -                        | 291 |
| 259 | - - - - -                        | 291 |
| 260 | - - - - -                        | 291 |
| 261 | - - - - -                        | 292 |
| 262 | - - - - -                        | 291 |
| 263 | - - - - -                        | 293 |
| 264 | - - - - -                        | 293 |
| 265 | - - - - -                        | 292 |
| 266 | - - - - -                        | 290 |
| 267 | - - - - -                        | 292 |
| 268 | - - - - -                        | 292 |
| 269 | - - - - -                        | 291 |
| 270 | EKPTTGGSGSTGGNQGGTGGGN - - - - - | 315 |
| 271 | - - - - -                        | 291 |
| 272 | - - - - -                        | 291 |
| 273 | - - - - -                        | 292 |
| 274 | - - - - -                        | 292 |
| 275 | - - - - -                        | 291 |
| 276 | - - - - -                        | 291 |
| 277 | - - - - -                        | 291 |
| 278 | - - - - -                        | 292 |
| 279 | - - - - -                        | 291 |
| 280 | - - - - -                        | 291 |
| 281 | - - - - -                        | 282 |
| 282 | - - - - -                        | 292 |
| 283 | - - - - -                        | 291 |
| 284 | - - - - -                        | 291 |
| 285 | - - - - -                        | 289 |
| 286 | - - - - -                        | 291 |
| 287 | - - - - -                        | 292 |
| 288 | - - - - -                        | 291 |
| 289 | - - - - -                        | 292 |
| 290 | - - - - -                        | 291 |
| 291 | - - - - -                        | 291 |
| 292 | - - - - -                        | 291 |
| 293 | - - - - -                        | 291 |
| 294 | - - - - -                        | 291 |
| 295 | - - - - -                        | 292 |
| 296 | - - - - -                        | 292 |
| 297 | - - - - -                        | 292 |
| 298 | - - - - -                        | 289 |
| 299 | - - - - -                        | 292 |
| 300 | - - - - -                        | 285 |
| 301 | - - - - -                        | 292 |
| 302 | - - - - -                        | 292 |
| 303 | - - - - -                        | 291 |



|     |           |     |
|-----|-----------|-----|
| 304 | - - - - - | 292 |
| 305 | - - - - - | 292 |
| 306 | - - - - - | 292 |
| 307 | - - - - - | 291 |
| 308 | - - - - - | 292 |
| 309 | - - - - - | 291 |
| 310 | - - - - - | 291 |
| 311 | - - - - - | 291 |
| 312 | - - - - - | 292 |
| 313 | - - - - - | 291 |
| 314 | - - - - - | 291 |
| 315 | - - - - - | 291 |
| 316 | - - - - - | 292 |
| 317 | - - - - - | 293 |
| 318 | - - - - - | 292 |
| 319 | - - - - - | 292 |
| 320 | - - - - - | 291 |
| 321 | - - - - - | 292 |
| 322 | - - - - - | 291 |
| 323 | - - - - - | 291 |
| 324 | - - - - - | 288 |
| 325 | - - - - - | 291 |
| 326 | - - - - - | 292 |
| 327 | - - - - - | 292 |
| 328 | - - - - - | 292 |
| 329 | - - - - - | 291 |
| 330 | - - - - - | 291 |
| 331 | - - - - - | 292 |
| 332 | - - - - - | 291 |
| 333 | - - - - - | 291 |
| 334 | - - - - - | 293 |
| 335 | - - - - - | 291 |
| 336 | - - - - - | 289 |
| 337 | - - - - - | 291 |
| 338 | - - - - - | 292 |
| 339 | - - - - - | 291 |
| 340 | - - - - - | 292 |
| 341 | - - - - - | 291 |
| 342 | - - - - - | 301 |
| 343 | - - - - - | 291 |
| 344 | - - - - - | 291 |
| 345 | - - - - - | 291 |
| 346 | - - - - - | 291 |
| 347 | - - - - - | 288 |
| 348 | - - - - - | 293 |
| 349 | - - - - - | 291 |
| 350 | - - - - - | 290 |
| 351 | - - - - - | 281 |
| 352 | - - - - - | 291 |
| 353 | - - - - - | 306 |
| 354 | - - - - - | 287 |
| 355 | - - - - - | 293 |
| 356 | - - - - - | 291 |
| 357 | - - - - - | 290 |
| 358 | - - - - - | 291 |
| 359 | - - - - - | 292 |
| 360 | - - - - - | 291 |
| 361 | - - - - - | 293 |
| 362 | - - - - - | 292 |
| 363 | - - - - - | 291 |
| 364 | - - - - - | 291 |
| 365 | - - - - - | 291 |
| 366 | - - - - - | 291 |
| 367 | - - - - - | 293 |
| 368 | - - - - - | 293 |
| 369 | - - - - - | 291 |
| 370 | - - - - - | 291 |

|     |       |     |
|-----|-------|-----|
| 371 | ----- | 291 |
| 372 | ----- | 291 |
| 373 | ----- | 291 |
| 374 | ----- | 291 |
| 375 | ----- | 291 |
| 376 | ----- | 291 |
| 377 | ----- | 295 |
| 378 | ----- | 291 |
| 379 | ----- | 291 |
| 380 | ----- | 293 |
| 381 | ----- | 293 |
| 382 | ----- | 305 |
| 383 | ----- | 293 |
| 384 | ----- | 293 |
| 385 | ----- | 291 |
| 386 | ----- | 291 |
| 387 | ----- | 306 |
| 388 | ----- | 293 |
| 389 | ----- | 292 |
| 390 | ----- | 305 |
| 391 | ----- | 293 |
| 392 | ----- | 291 |
| 393 | ----- | 291 |
| 394 | ----- | 293 |
| 395 | ----- | 293 |
| 396 | ----- | 305 |
| 397 | ----- | 310 |
| 398 | ----- | 287 |
| 399 | ----- | 293 |
| 400 | ----- | 293 |
| 401 | ----- | 293 |
| 402 | ----- | 293 |
| 403 | ----- | 289 |
| 404 | ----- | 292 |
| 405 | ----- | 286 |
| 406 | ----- | 293 |
| 407 | ----- | 290 |
| 408 | ----- | 291 |
| 409 | ----- | 293 |
| 410 | ----- | 293 |
| 411 | ----- | 293 |
| 412 | ----- | 293 |
| 413 | ----- | 287 |
| 414 | ----- | 293 |
| 415 | ----- | 293 |
| 416 | ----- | 293 |
| 417 | ----- | 305 |
| 418 | ----- | 291 |
| 419 | ----- | 300 |
| 420 | ----- | 293 |
| 421 | ----- | 287 |
| 422 | ----- | 295 |
| 423 | ----- | 305 |
| 424 | ----- | 293 |
| 425 | ----- | 293 |
| 426 | ----- | 295 |
| 427 | ----- | 291 |
| 428 | ----- | 291 |
| 429 | ----- | 286 |
| 430 | ----- | 298 |
| 431 | ----- | 293 |
| 432 | ----- | 305 |
| 433 | ----- | 286 |
| 434 | ----- | 292 |
| 435 | ----- | 292 |
| 436 | ----- | 293 |
| 437 | ----- | 291 |

|     |                                       |     |
|-----|---------------------------------------|-----|
| 438 | - - - - -                             | 293 |
| 439 | AKPTTGGs - - - GGTQGSGTGGGN - - - - - | 312 |
| 440 | - - - - -                             | 287 |
| 441 | - - - - -                             | 295 |
| 442 | - - - - -                             | 294 |
| 443 | - - - - -                             | 291 |
| 444 | - - - - -                             | 305 |
| 445 | - - - - -                             | 305 |
| 446 | - - - - -                             | 284 |
| 447 | - - - - -                             | 285 |
| 448 | - - - - -                             | 293 |
| 449 | - - - - -                             | 284 |
| 450 | - - - - -                             | 286 |
| 451 | - - - - -                             | 295 |
| 452 | - - - - -                             | 295 |
| 453 | - - - - -                             | 293 |
| 454 | - - - - -                             | 310 |
| 455 | - - - - -                             | 300 |
| 456 | - - - - -                             | 288 |
| 457 | - - - - -                             | 282 |
| 458 | - - - - -                             | 290 |
| 459 | - - - - -                             | 300 |
| 460 | - - - - -                             | 283 |
| 461 | - - - - -                             | 310 |
| 462 | - - - - -                             | 278 |
| 463 | GECA - - - - - GPVPA - - - - -        | 236 |
| 464 | - - - - -                             | 290 |
| 465 | - - - - -                             | 285 |
| 466 | - - - - -                             | 276 |
| 467 | - - - - -                             | 280 |
| 468 | - - - - -                             | 281 |
| 469 | - - - - -                             | 294 |
| 470 | - - - - -                             | 282 |
| 471 | - - - - -                             | 306 |
| 472 | - - - - -                             | 310 |
| 473 | - - - - -                             | 306 |
| 474 | - - - - -                             | 276 |
| 475 | - - - - -                             | 282 |
| 476 | - - - - -                             | 310 |
| 477 | - - - - -                             | 305 |
| 478 | - - - - -                             | 305 |
| 479 | - - - - -                             | 309 |
| 480 | - - - - -                             | 306 |
| 481 | - - - - -                             | 278 |
| 482 | - - - - -                             | 276 |
| 483 | - - - - -                             | 294 |
| 484 | - - - - -                             | 277 |
| 485 | - - - - -                             | 295 |
| 486 | - - - - -                             | 294 |
| 487 | - - - - -                             | 288 |
| 488 | - - - - -                             | 294 |
| 489 | - - - - -                             | 294 |
| 490 | - - - - -                             | 310 |
| 491 | - - - - -                             | 275 |
| 492 | - - - - -                             | 305 |
| 493 | - - - - -                             | 279 |
| 494 | - - - - -                             | 295 |
| 495 | - - - - -                             | 277 |
| 496 | - - - - -                             | 278 |
| 497 | - - - - -                             | 306 |
| 498 | - - - - -                             | 275 |
| 499 | - - - - -                             | 294 |
| 500 | - - - - -                             | 310 |

**Compare to:** the consensus

Amino acids that match the reference are marked with yellow highlighting.

**Created:** 4 Aug 2022

**Last Modified:** 4 Aug 2022

| Feature | Location | Size |  | Type |
|---------|----------|------|-----------------------------------------------------------------------------------|------|
|---------|----------|------|-----------------------------------------------------------------------------------|------|
